# Supplementary material for: A copper-catalyzed arylation of tryptamines for the direct synthesis of aryl pyrroloindolines
Source: Royal Society of Chemistry journal article supplement (doi:10.1039/c2sc20914d), 2012-01-01

## **A Copper-Catalyzed Arylation of Tryptamines for the Synthesis of Pyrroloindolines**

Madeleine E. Kieffer, Kangway V. Chuang, Sarah E. Reisman\*

*The Warren and Katharine Schlinger Laboratory of Chemistry and Chemical Engineering  
Division of Chemistry and Chemical Engineering, California Institute of Technology, Pasadena,  
California 91125  
reisman@caltech.edu*

### **Supporting Information 1 (Experimental Procedures):**

## Table of Contents

|                                                                          |     |
|--------------------------------------------------------------------------|-----|
| 1. General considerations                                                | S3  |
| 2. Optimization of reaction parameters                                   | S4  |
| 3. Synthesis of <i>N</i> -tosyl tryptamine derivatives                   | S6  |
| 4. Synthesis of <i>N</i> -tosyl- <i>N'</i> -alkyl tryptamine derivatives | S9  |
| 5. Synthesis of Diaryliodonium tetrafluoroborates                        | S10 |
| 6. Synthesis of <i>N</i> -tosyl pyrroloindolines                         | S12 |
| 7. Reaction scalability and catalyst efficiency: large scale reaction    | S21 |

**1. General Considerations.** Unless otherwise stated, reactions were performed under a nitrogen atmosphere using freshly dried solvents. Tetrahydrofuran (THF), methylene chloride ( $\text{CH}_2\text{Cl}_2$ ), acetonitrile (MeCN), dimethylformamide (DMF), and toluene (PhMe) were dried by passing through activated alumina columns. Triethylamine ( $\text{Et}_3\text{N}$ ) was distilled over calcium hydride prior to use. Unless otherwise stated, chemicals and reagents were used as received. All reactions were monitored by thin-layer chromatography using EMD/Merck silica gel 60 F254 pre-coated plates (0.25 mm) and were visualized by UV, *p*-anisaldehyde, or  $\text{KMnO}_4$  staining. Reaction samples were analyzed on an Agilent 1290 Series LC/MS using an Eclipse Plus C18 column (RRHD 1.8  $\mu\text{m}$ , 2.1 x 50 mm, 11,072 plates). Flash column chromatography was performed either as described by Still et al.<sup>1</sup> using silica gel (partical size 0.032-0.063) purchased from Silicycle or using pre-packaged RediSep<sup>®</sup>Rf columns on a CombiFlash Rf system (Teledyne ISCO Inc.). Alumina was purchased from Sigma-Aldrich (Aluminum oxide, ~150 mesh, 58Å pore size, activated, basic, Brockmann I) and deactivated with 3% v/w  $\text{H}_2\text{O}$  (30.0 mL / 970 g).  $^1\text{H}$  and  $^{13}\text{C}$  NMR spectra were recorded on a Varian 400 MR (at 400 MHz and 101 MHz, respectively), a Varian Inova 500 (at 500 MHz and 126 MHz, respectively), or a Varian Inova 600 (at 600 MHz and 150 MHz, respectively), and are reported relative to internal  $\text{CHCl}_3$  ( $^1\text{H}$ ,  $\delta = 7.26$ ) or DMSO ( $^1\text{H}$ ,  $\delta = 2.50$ ), and  $\text{CDCl}_3$  ( $^{13}\text{C}$ ,  $\delta = 77.0$ ), or DMSO ( $^{13}\text{C}$ ,  $\delta = 40.0$ ). Data for  $^1\text{H}$  NMR spectra are reported as follows: chemical shift ( $\delta$  ppm) (multiplicity, coupling constant (Hz), integration). Multiplicity and qualifier abbreviations are as follows: s = singlet, d = doublet, t = triplet, q = quartet, m = multiplet, br = broad. IR spectra were recorded on a Perkin Elmer Paragon 1000 spectrometer and are reported in frequency of absorption ( $\text{cm}^{-1}$ ). HRMS were acquired using an Agilent 6200 Series TOF with an Agilent G1978A Multimode source in electrospray ionization (ESI), atmospheric pressure chemical ionization (APCI), or mixed (MM) ionization mode.

## 2. Optimization of Reaction Parameters

### A. Palladium-Catalyzed Reaction Screens

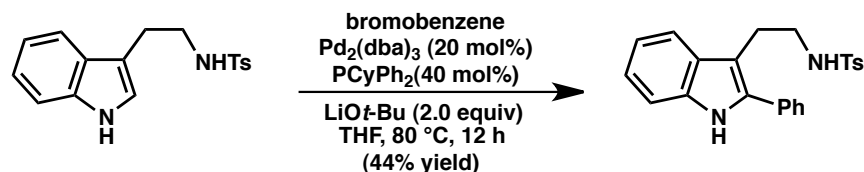

To a flame-dried vial in the glove box was charged  $\text{PCyPh}_2$  (11 mg, 0.04 mmol),  $\text{Pd}_2(\text{dba})_3$  (11 mg, 0.02 mmol), N-tosyltryptamine (31 mg, 0.1 mmol), bromobenzene (51  $\mu\text{L}$ , 0.5 mmol),  $\text{LiOtBu}$  (16 mg, 0.2 mmol) and THF (1 mL). The vial was sealed and heated to 80 °C for 12 hours. The reaction mixture was filtered through a plug of silica and concentrated *in vacuo*. The crude residue was purified by silica gel flash chromatography (20% EtOAc in hexanes) to afford 2-phenyl tryptamine **17** (16.9 mg, 0.04 mmol, 44%).  $^1\text{H}$  NMR ( $\text{CDCl}_3$ , 500 MHz)  $\delta$  8.11 (s, 1H), 7.58 (d,  $J$  = 8.2 Hz, 2H), 7.52 – 7.42 (m, 5H), 7.40 (ddd,  $J$  = 4.1, 1.5, 1.5 Hz, 1H), 7.37 (d,  $J$  = 8.1 Hz, 1H), 7.20 (dd,  $J$  = 16.1, 7.8 Hz, 3H), 7.09 (dd,  $J$  = 7.8, 7.2 Hz, 1H), 4.35 (t,  $J$  = 5.8 Hz, 1H), 3.28 (dd,  $J$  = 13.3, 6.8 Hz, 2H), 3.08 (dd,  $J$  = 7.1, 7.1 Hz, 2H), 2.40 (s, 3H);  $^{13}\text{C}$  NMR ( $\text{CDCl}_3$ , 126 MHz)  $\delta$  143.2, 136.7, 135.8, 132.5, 129.6, 129.0, 128.5, 128.10, 128.09, 127.0, 122.6, 120.0, 118.8, 110.9, 108.3, 43.2, 25.0, 21.5; HRMS (MM) calc'd for  $[\text{M}+\text{H}]^+$  391.1475, found 391.1491.

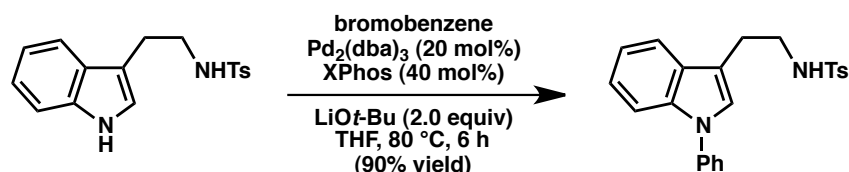

To a flame-dried vial in the glove box was charged XPhos (19 mg, 0.04 mmol),  $\text{Pd}_2(\text{dba})_3$  (11 mg, 0.02 mmol), N-tosyltryptamine (31 mg, 0.1 mmol), bromobenzene (51  $\mu\text{L}$ , 0.5 mmol),  $\text{LiOtBu}$  (16 mg, 0.2 mmol) and THF (1 mL). The vial was sealed and heated to 80 °C for 6 hours. The reaction mixture was filtered through a plug of silica and concentrated *in vacuo*. The crude residue was purified by silica gel flash chromatography (20% EtOAc in hexanes) to afford N-phenyl tryptamine **16** (35.2 mg, 0.09 mmol, 90%).  $^1\text{H}$  NMR ( $\text{CDCl}_3$ , 500 MHz)  $\delta$  7.70 – 7.65 (m, 2H), 7.57 – 7.43 (m, 6H), 7.39 – 7.32 (m, 1H), 7.23 (dd,  $J$  = 11.6, 4.5 Hz, 3H), 7.16 – 7.10 (m, 1H), 7.09 (s, 1H), 4.54 (t,  $J$  = 6.1 Hz, 1H), 3.34 (q,  $J$  = 6.6 Hz, 2H), 2.99 (t,  $J$  = 6.7 Hz, 2H), 2.38 (s, 3H);  $^{13}\text{C}$  NMR ( $\text{CDCl}_3$ , 126 MHz)  $\delta$  143.3, 139.4, 136.8, 136.1, 129.6, 128.3, 127.0, 126.4, 126.2, 124.1, 122.7, 120.1, 118.8, 112.7, 110.7, 43.1, 25.4, 21.5. HRMS (MM) calc'd for  $[\text{M}+\text{H}]^+$  391.1475, found 391.1470.



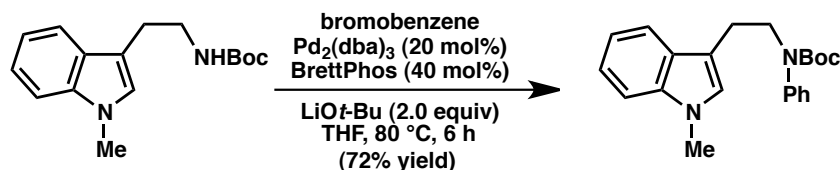

To a flame-dried vial in the glove box was charged BrettPhos (6.4 mg, 0.012 mmol),  $\text{Pd}_2(\text{dba})_3$  (3.5 mg, 0.006 mmol), *N*-Boc-*N*'-methyltryptamine (8 mg, 0.1 mmol), bromobenzene (16  $\mu\text{L}$ , 0.15 mmol), LiOtBu (4.8 mg, 0.06 mmol) and THF (1 mL). The vial was sealed and heated to 80 °C for 6 hours. The reaction mixture was filtered through a plug of silica and concentrated *in vacuo*. The crude residue was purified by silica gel flash chromatography (20% EtoAc in hexanes) to afford *N*-phenyl tryptamine **15** (28.0 mg, 0.02 mmol, 72%).  $^1\text{H}$  NMR ( $\text{CDCl}_3$ , 500 MHz)  $\delta$  7.54 (d,  $J$  = 7.9 Hz, 1H), 7.34 (dd,  $J$  = 10.7, 4.9 Hz, 2H), 7.28 (d,  $J$  = 8.2 Hz, 1H), 7.24 – 7.18 (m, 4H), 7.07 (ddd,  $J$  = 7.9, 7.0, 1.0 Hz, 1H), 6.85 (s, 1H), 3.97 – 3.87 (m, 2H), 3.72 (s, 3H), 3.06 – 2.95 (m, 2H), 1.42 (s, 10H).  $^{13}\text{C}$  NMR ( $\text{CDCl}_3$ , 126 MHz) 148.4, 143.5, 139.4, 136.4, 135.6, 132.6, 131.9, 129.6, 128.5, 127.2, 127.1, 127.0, 125.7, 124.3, 119.2, 109.4, 84.4, 62.1, 47.4, 37.9, 21.4, 20.8. FTIR (NaCl, thin film): 3056, 3027, 2949, 2891, 2827, 1762, 1605, 1491, 1347, 1160, 1092, 1022. HRMS (MM) calc'd for  $[\text{M}+\text{H}]^+$  409.1381, found 409.1363.

## B. Copper-Catalyzed Reaction Screen

**General Procedure** – To a flame-dried, 1-dram vial was charged the appropriate tryptamine (0.10 mmol), 4,4'-di-*tert*-butylbiphenyl, diaryl iodonium salt (0.11 mmol), copper catalyst (0.010 mmol), and additive (0.10 mmol, if applicable). Anhydrous  $\text{CH}_2\text{Cl}_2$  (1.0 mL) was then added and the reaction stirred under inert atmosphere and monitored by UHPLC-MS for optimal yield.

The following response factors relative to an internal standard of 4,4'-di-*tert*-butylbiphenyl were measured and calculated based on three runs of varied concentration at  $\lambda$  = 254 nm:

*N*-Tosyltryptamine **18a** (Starting Material): Response Factor = 0.117

*N*-Tosylpyrroloindoline **19a** (Product): Response Factor = 0.253

UHPLC samples were analyzed at  $\lambda$  = 254 nm and yields calculated based on the above factors.

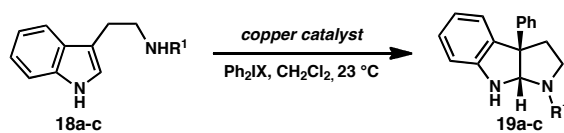

| entry | R  | Cu source                 | X             | additive | pdt        | yield (%) <sup>a</sup> |
|-------|----|---------------------------|---------------|----------|------------|------------------------|
| 1     | Ts | $\text{Cu}(\text{OTf})_2$ | $\text{BF}_4$ | –        | <b>19a</b> | 62 <sup>b</sup>        |

|    |     |                            |                 |                    |            |    |
|----|-----|----------------------------|-----------------|--------------------|------------|----|
| 2  | Ts  | –                          | BF <sub>4</sub> | –                  | <b>19a</b> | 0  |
| 3  | Boc | Cu(OTf) <sub>2</sub>       | BF <sub>4</sub> | –                  | <b>19b</b> | <5 |
| 4  | Ac  | Cu(OTf) <sub>2</sub>       | BF <sub>4</sub> | –                  | <b>19c</b> | <5 |
| 5  | Ts  | (CuOTf) <sub>2</sub> •PhMe | BF <sub>4</sub> | –                  | <b>19a</b> | 64 |
| 6  | Ts  | CuI                        | BF <sub>4</sub> | –                  | <b>19a</b> | 0  |
| 7  | Ts  | Cu(MeCN)PF <sub>6</sub>    | BF <sub>4</sub> | –                  | <b>19a</b> | 0  |
| 8  | Ts  | Cu(OAc) <sub>2</sub>       | BF <sub>4</sub> | –                  | <b>19a</b> | 64 |
| 9  | Ts  | Cu(OTf) <sub>2</sub>       | PF <sub>6</sub> | –                  | <b>19a</b> | 28 |
| 10 | Ts  | Cu(OTf) <sub>2</sub>       | OTf             | –                  | <b>19a</b> | 32 |
| 11 | Ts  | Cu(OTf) <sub>2</sub>       | Cl              | –                  | <b>19a</b> | 0  |
| 12 | Ts  | Cu(OTf) <sub>2</sub>       | BF <sub>4</sub> | dtbpy              | <b>19a</b> | <5 |
| 13 | Ts  | Cu(OTf) <sub>2</sub>       | BF <sub>4</sub> | NaHCO <sub>3</sub> | <b>19a</b> | 55 |
| 14 | Ts  | Cu(OTf) <sub>2</sub>       | BF <sub>4</sub> | AcOH               | <b>19a</b> | 62 |
| 15 | Ts  | Cu(OTf) <sub>2</sub>       | BF <sub>4</sub> | – <sup>c</sup>     | <b>19a</b> | 65 |

[a] Determined by HPLC versus an internal standard. [b] Isolated yield. [c] [Ph-I-Mes]BF<sub>4</sub> was employed as the electrophile

### 3. Preparation of *N*-tosyltryptamine derivatives (**20a** – **20j**):

**General Procedure A** – To a solution of tryptamine (1.00 equiv) in CH<sub>2</sub>Cl<sub>2</sub> (0.1 M) was added Et<sub>3</sub>N (1.50 equiv). The solution was cooled to 0 °C in an ice bath and *p*-toluenesulfonyl chloride (1.01 equiv) added in one portion as solid against a positive stream of nitrogen. The solution was stirred for 15 minutes, then the ice bath removed and allowed to warm up to ambient temperature (20 to 25 °C) and stirred for an additional 4 hours. The reaction was then quenched with 1 N aq. HCl (equal volume to CH<sub>2</sub>Cl<sub>2</sub> used) and the organic layer separated and washed with another portion of 1N aq. HCl. The combined aqueous layers were then combined and back extracted with CH<sub>2</sub>Cl<sub>2</sub> (20 mL), then the organic layers combined, dried over anhydrous Na<sub>2</sub>SO<sub>4</sub>, filtered, and concentrated *in vacuo*. The resulting crude residue was purified by flash chromatography (SiO<sub>2</sub>) to afford *N*-tosyltryptamine as a white or off-white solid.

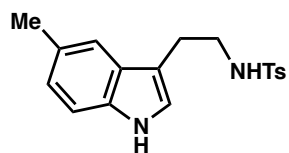

***N*-Tosyltryptamine 20b:** Prepared according to General Procedure A. Reaction run on 6.40 mmol (1.30 g) scale. The crude material was purified by silica gel chromatography (gradient elution, 10-60% EtOAc in Hexane) to afford **20b** as a white, amorphous solid (1.58 g, 4.81 mmol, 75 % yield). <sup>1</sup>H NMR (CDCl<sub>3</sub>, 500 MHz) δ 7.98

(s, 1H), 7.67 – 7.60 (m, 2H), 7.25 – 7.19 (m, 3H), 7.17 (dd, *J* = 1.5, 0.7 Hz, 1H), 7.01 (dd, *J* = 8.3, 1.6 Hz, 1H), 6.92 (d, *J* = 2.3 Hz, 1H), 4.46 (t, *J* = 6.0 Hz, 1H), 3.26 (q, *J* = 6.5 Hz, 2H), 2.89 (dd, *J* = 6.9, 6.3 Hz, 2H), 2.41 (s, 3H), 2.40 (s, 3H); <sup>13</sup>C NMR (CDCl<sub>3</sub>, 126 MHz) 143.2, 136.7, 134.7, 129.6, 128.7, 127.0, 127.0, 123.8, 122.7, 118.1, 110.9, 110.9, 42.9, 25.4, 21.5, 21.4; FTIR (NaCl, thin film): 3401, 3290, 3042, 2919, 2864, 1597, 1423, 1320, 1303, 1157, 1093. HRMS (MM) calc'd for [M+H]<sup>+</sup> 329.1318, found 329.1316.

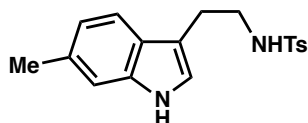

***N*-Tosyltryptamine 20c:** Prepared according to General Procedure A. Reaction run on 3.68 mmol (641 mg) scale. The crude material was purified by silica gel

chromatography (gradient elution, 10-60% EtOAc in Hexane) to afford **20c** as a white, amorphous solid (940 mg, 2.87 mmol, 78 % yield).

$^1\text{H}$  NMR ( $\text{CDCl}_3$ , 500 MHz)  $\delta$  7.94 (s, 1H), 7.67 – 7.59 (m, 2H), 7.29 (d,  $J$  = 8.1 Hz, 1H), 7.21 (d,  $J$  = 8.0 Hz, 2H), 7.14 (s, 1H), 6.92 – 6.86 (m, 2H), 4.46 (t,  $J$  = 6.1 Hz, 1H), 3.25 (q,  $J$  = 6.5 Hz, 2H), 2.90 (t,  $J$  = 6.6 Hz, 2H), 2.45 (s, 3H), 2.40 (s, 3H).  $^{13}\text{C}$  NMR ( $\text{CDCl}_3$ , 126 MHz)  $\delta$  143.2, 136.8, 136.7, 132.1, 129.6, 127.0, 124.7, 121.9, 121.3, 118.1, 111.3, 111.2, 43.0, 25.5, 21.6, 21.5. FTIR (NaCl, thin film): 3401, 3280, 2913, 2859, 1456, 1404, 1320, 1301, 1157, 1093. HRMS (MM) calc'd for  $[\text{M}+\text{H}]^+$  329.1318, found 329.1307.

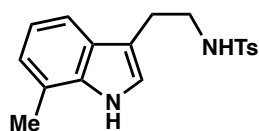

**N-Tosyltryptamine 20d:** Prepared according to General Procedure A. Reaction run on 3.84 mmol (669 mg) scale. The crude material was purified by silica gel chromatography (gradient elution, 10-60% EtOAc in Hexane) to afford **20d** as a white, amorphous solid

(1.02g, 3.11 mmol, 81 % yield).  $^1\text{H}$  NMR ( $\text{CDCl}_3$ , 500 MHz)  $\delta$  8.27 (s, 1H), 7.90 (d,  $J$  = 8.2 Hz, 2H), 7.57 – 7.50 (m, 1H), 7.48 (d,  $J$  = 8.5 Hz, 2H), 7.24 (dd,  $J$  = 9.7, 2.0 Hz, 3H), 4.75 (t,  $J$  = 6.1 Hz, 1H), 3.53 (q,  $J$  = 6.5 Hz, 2H), 3.18 (t,  $J$  = 6.6 Hz, 2H), 2.73 (s, 3H), 2.66 (s, 3H);  $^{13}\text{C}$  NMR (126 MHz,  $\text{cdcl}_3$ )  $\delta$  143.3, 136.7, 136.0, 129.6, 127.0, 126.3, 122.7, 122.3, 120.5, 119.7, 116.2, 112.0, 43.0, 25.6, 21.5, 16.6l FTIR (NaCl, thin film): 3400, 3275, 3047, 2908, 2849, 1436, 1320, 1303, 1157, 1093, 1063. HRMS (MM) calc'd for  $[\text{M}+\text{H}]^+$  329.1318, found 329.1307.

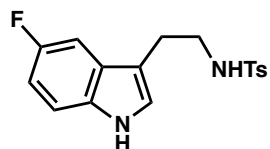

**N-Tosyltryptamine 20e:** Prepared according to General Procedure A. Reaction run on 3.43 mmol (610 mg) scale. The crude material was purified by silica gel chromatography (gradient elution, 10-60% EtOAc in Hexane) to afford **20e** as an off-white, amorphous solid (940 mg, 2.83 mmol, 82 % yield).

$^1\text{H}$  NMR ( $\text{CDCl}_3$ , 500 MHz)  $\delta$  8.12 (s, 1H), 7.64 – 7.60 (m, 2H), 7.28 – 7.24 (m, 1H), 7.22 (dd,  $J$  = 8.5, 0.6 Hz, 2H), 7.02 (d,  $J$  = 2.4 Hz, 1H), 6.99 – 6.89 (m, 2H), 4.45 (t,  $J$  = 6.0 Hz, 1H), 3.24 (q,  $J$  = 6.6 Hz, 2H), 2.87 (dd,  $J$  = 6.8, 6.4 Hz, 2H), 2.40 (s, 3H);  $^{13}\text{C}$  NMR (126 MHz,  $\text{CDCl}_3$ )  $\delta$  157.6 (d,  $J_{\text{C-F}}$  = 233.8 Hz), 143.5, 136.4, 132.8, 129.6, 127.1 (d,  $J_{\text{C-F}}$  = 10.0 Hz), 127.0, 124.4, 111.9 (d,  $J_{\text{C-F}}$  = 8.8 Hz), 111.6 (d,  $J_{\text{C-F}}$  = 5.0 Hz), 110.6 (d,  $J_{\text{C-F}}$  = 26.3 Hz), 103.4 (d,  $J_{\text{C-F}}$  = 22.5 Hz), 42.71, 25.32, 21.47; FTIR (NaCl, thin film): 3392, 3275, 2933, 2864, 1486, 1457, 1319, 1301, 1157, 1093  $\text{cm}^{-1}$ . HRMS (MM) calc'd for  $[\text{M}+\text{H}]^+$  333.1068, found 333.1058.

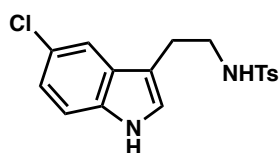

**N-Tosyltryptamine 20f:** Prepared according to General Procedure A. Reaction run on 3.34 mmol (650 mg) scale. The crude material was purified by silica gel chromatography (gradient elution, 10-60% EtOAc in Hexane) to afford **20f** as an off-

white, amorphous solid (1.08 g, 3.10 mmol, 92 % yield).  $^1\text{H}$  NMR ( $\text{CDCl}_3$ , 500 MHz)  $\delta$  8.18 (s, 1H), 7.65 – 7.57 (m, 2H), 7.28 (d,  $J$  = 2.0 Hz, 1H), 7.24 (d,  $J$  = 0.5 Hz, 1H), 7.21 (dd,  $J$  = 8.5, 0.6 Hz, 2H), 7.11 (dd,  $J$  = 8.7, 1.9 Hz, 1H), 7.00 (d,  $J$  = 2.3 Hz, 1H), 4.49 (t,  $J$  = 6.0 Hz, 1H), 3.23 (q,  $J$  = 6.6 Hz, 2H), 2.86 (td,  $J$  = 6.7, 0.6 Hz, 2H), 2.40 (s, 3H);  $^{13}\text{C}$  NMR ( $\text{CDCl}_3$ , 126 MHz)  $\delta$  143.5, 136.4, 134.7, 129.7, 127.9, 126.9, 125.2, 124.1, 122.5, 117.9, 112.3, 111.2, 42.7, 25.2, 21.5; FTIR (NaCl, thin film): 3385, 3275, 2913, 2859, 1464, 1422, 1319, 1156, 1093  $\text{cm}^{-1}$ ; HRMS (MM) calc'd for  $[\text{M}+\text{H}]^+$  349.0772, found 349.0766.

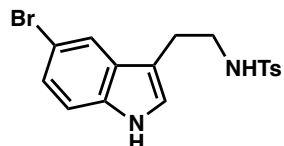

**5-Bromo-*N*-Tosyltryptamine 20g:** Reaction run on 7.99 mmol (1.91 g) scale. The crude material was purified by silica gel chromatography (gradient elution, 10-60% EtOAc in Hexane) to afford **20g** as a white amorphous solid (2.63g, 6.69 mmol, 84% yield).  $^1\text{H}$  NMR ( $\text{CDCl}_3$ , 500 MHz)  $\delta$  8.17 (s, 1H), 7.68 – 7.65 (m, 1H), 7.63 – 7.59 (m, 2H), 7.41 (dd,  $J$  = 8.5, 1.6 Hz, 1H), 7.23 (dd,  $J$  = 8.5, 0.6 Hz, 2H), 7.12 (dd,  $J$  = 8.5, 0.4 Hz, 1H), 6.95 (d,  $J$  = 2.3 Hz, 1H), 4.48 (t,  $J$  = 6.0 Hz, 1H), 3.23 (q,  $J$  = 6.5 Hz, 2H), 2.85 (t,  $J$  = 6.6 Hz, 2H), 2.41 (s, 3H);  $^{13}\text{C}$  NMR ( $\text{CDCl}_3$ , 126 MHz)  $\delta$  143.5, 136.4, 135.4, 130.5, 129.7, 129.4, 127.3, 126.9, 123.5, 113.3, 110.9, 82.9, 42.8, 25.2, 21.6; FTIR (NaCl, thin film): 3376, 3290, 2922, 2864, 1598, 1460, 1420, 1320, 1157, 1093  $\text{cm}^{-1}$ ; HRMS (MM) calc'd for  $[\text{M}+\text{H}]^+$  393.0267, found 393.0260.

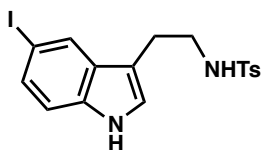

**5-Iodo-*N*-tosyltryptamine 20h:** To a 50-mL Schlenk tube was charged 5-bromo-*N*-tosyltryptamine **20g** (858 mg, 2.18 mmol, 1.00 equiv), CuI (42.0 mg, 0.220 mmol, 0.10 equiv), and NaI (654 mg, 4.36 mmol, 2.00 equiv). The vessel was then evacuated and backfilled with  $\text{N}_2$  three times, and *N,N'*-dimethylethylene diamine (47  $\mu\text{L}$ , 0.44 mmol, 0.20 equiv) and 1,4-dioxane (2.2 mL) added. The vessel was then sealed and heated to 100  $^\circ\text{C}$  for 23 hours, then cooled to room temperature, and quenched with concentrated aqueous  $\text{NH}_4\text{OH}$  (10 mL), then diluted with  $\text{H}_2\text{O}$  (30 mL). The mixture was then extracted with  $\text{CH}_2\text{Cl}_2$  (3 x 30 mL), the organic layers combined, dried over anhydrous  $\text{Na}_2\text{SO}_4$ , filtered, and concentrated *in vacuo*. Flash chromatography (gradient elution, 10-60% EtOAc in Hexanes) afforded 5-iodo-*N*-tosyltryptamine as a white solid (900 mg, 2.04 mmol, 94% yield).  $^1\text{H}$  NMR ( $\text{CDCl}_3$ , 500 MHz)  $\delta$  8.27 (s, 1H), 7.63 – 7.57 (m, 2H), 7.44 (d,  $J$  = 1.8 Hz, 1H), 7.24 – 7.17 (m, 4H), 6.96 (d,  $J$  = 2.4 Hz, 1H), 4.62 (t,  $J$  = 6.0 Hz, 1H), 3.22 (q,  $J$  = 6.6 Hz, 2H), 2.83 (t,  $J$  = 6.6 Hz, 2H), 2.40 (s, 3H).  $^{13}\text{C}$  NMR ( $\text{CDCl}_3$ , 126 MHz)  $\delta$  143.5, 136.3, 134.9, 129.7, 128.5, 126.9, 124.9, 124.0, 120.9, 112.8, 112.6, 111.0, 42.7, 25.1, 21.5; FTIR (NaCl, thin film): 3391, 3290, 2928, 2854, 1598, 1456, 1417, 1319, 1288, 1157, 1093  $\text{cm}^{-1}$ ; HRMS (MM) calc'd for  $[\text{M}+\text{H}]^+$  441.0128, found 441.0130.

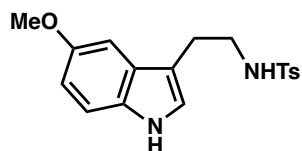

**5-Methoxy-*N*-Tosyltryptamine 20i:** Prepared according to General Procedure A.

Reaction run on 5.94 mmol (1.13 g) scale. The crude material was purified by silica gel chromatography (gradient elution, 10-60% EtOAc in Hexane) to afford **20i** as a white amorphous solid (1.68g, 4.88 mmol, 82 % yield). <sup>1</sup>H NMR (CDCl<sub>3</sub>, 500 MHz)

δ 7.98 (s, 1H), 7.64 – 7.58 (m, 2H), 7.24 (dd, *J* = 8.7, 0.5 Hz, 1H), 7.20 (d, *J* = 7.9 Hz, 2H), 6.95 (d, *J* = 2.3 Hz, 1H), 6.87 – 6.81 (m, 2H), 4.45 (t, *J* = 6.0 Hz, 1H), 3.80 (s, 3H), 3.25 (q, *J* = 6.5 Hz, 2H), 2.91 (t, *J* = 6.6 Hz, 2H), 2.40 (s, 3H); <sup>13</sup>C NMR (CDCl<sub>3</sub>, 126 MHz) δ 154.0, 143.3, 136.6, 131.6, 129.6, 127.2, 127.0, 123.3, 112.5, 112.0, 111.2, 100.2, 55.8, 42.8, 25.4, 21.5; FTIR (NaCl, thin film): 3390, 3285, 2928, 2824, 1486, 1459, 1437, 1319, 1215, 1156, 1092 cm<sup>-1</sup>; HRMS (MM) calc'd for [M+H]<sup>+</sup> 345.1267, found 345.1266.

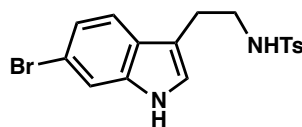

***N*-Tosyltryptamine 20j:** Prepared according to General Procedure A. Reaction run

on 10.90 mmol (2.61 g) scale. The crude material was purified by silica gel chromatography (gradient elution, 10-60% EtOAc in Hexane) to afford **20j** as a

white, amorphous solid (3.42g, 8.70 mmol, 80 % yield). <sup>1</sup>H NMR (CDCl<sub>3</sub>, 500 MHz) δ 8.11 (s, 1H), 7.63 – 7.56 (m, 2H), 7.49 (dd, *J* = 1.7, 0.5 Hz, 1H), 7.23 (d, *J* = 8.4 Hz, 1H), 7.21 – 7.18 (m, 2H), 7.13 (dd, *J* = 8.4, 1.7 Hz, 1H), 6.95 (d, *J* = 2.4 Hz, 1H), 4.44 (t, *J* = 6.1 Hz, 1H), 3.24 (q, *J* = 6.5 Hz, 2H), 2.89 (t, *J* = 6.4 Hz, 2H), 2.40 (s, 3H). <sup>13</sup>C NMR (CDCl<sub>3</sub>, 126 MHz) δ 143.4, 137.1, 36.5, 129.6, 126.9, 125.8, 123.2, 122.8, 119.7, 115.8, 114.2, 111.8, 42.9, 25.3, 21.5; FTIR (NaCl, thin film): 3368, 3270, 2933, 2864, 1457, 1399, 1319, 1156, 1092. HRMS (MM) calc'd for [M+H]<sup>+</sup> 393.0267, found 393.0252.

#### 4. Preparation of *N*-tosyl-*N'*-alkyltryptamines (20k - 20l):

**General procedure B** – To a solution of *N*-tosyltryptamine (1.57 g, 5.00 mmol, 1.00 equiv) in DMF (17 mL) at 20 °C was added NaH (60% dispersion in mineral oil, 0.700 g, 17.5 mmol, 3.5 equiv) slowly, with vigorous stirring, and stirring continued at 20 °C. After 30 minutes, the solution was cooled to 0 °C in an ice bath, and the appropriate alkyl halide (5.00 mmol, 1.00 equiv) was added dropwise by syringe over three minutes. Stirring was continued at 0 °C for two hours, and the reaction allowed to warm to 20 °C and stirring continued for 13 hours. The reaction was then carefully quenched by the dropwise addition of saturated, aqueous ammonium chloride (10 mL), and the mixture diluted with EtOAc (100 mL), and washed with brine (2 x 50 mL). The organic layer was then dried over anhydrous Na<sub>2</sub>SO<sub>4</sub>, filtered, and concentrated *in vacuo*. Flash chromatography (SiO<sub>2</sub>) afforded *N'*-alkylated tryptamines as a white solid.

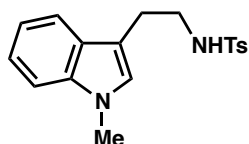

**N-tosyl-N'-methyltryptamines 20k:** Prepared according to General Procedure B. Reaction run on 5.00 mmol (1.57 g) scale. The crude material was purified by silica gel chromatography (gradient elution, 20-40% EtOAc in Hexane) to afford **20k** as a white, amorphous solid (1.18 g, 3.59 mmol, 72 % yield).  $^1\text{H}$  NMR ( $\text{CDCl}_3$ , 500 MHz)  $\delta$  7.64 (d,  $J$  = 8.3 Hz, 2H), 7.40 (d,  $J$  = 7.9 Hz, 1H), 7.29 (d,  $J$  = 8.2 Hz, 1H), 7.25 – 7.19 (m, 3H), 7.05 (dd,  $J$  = 7.4, 7.4 Hz, 1H), 6.82 (s, 1H), 4.41 (t,  $J$  = 6.0 Hz, 1H), 3.73 (s, 3H), 3.26 (q,  $J$  = 6.5 Hz, 2H), 2.92 (t,  $J$  = 6.6 Hz, 2H), 2.41 (s, 3H).  $^{13}\text{C}$  NMR ( $\text{CDCl}_3$ , 126 MHz)  $\delta$  143.1, 143.1, 137.0, 136.8, 129.6, 129.5, 129.5, 129.5, 129.5, 129.5, 127.3, 127.2, 126.9, 121.7, 118.9, 118.9, 118.5, 109.9, 109.9, 109.3, 109.3, 43.2, 43.2, 32.6, 32.5, 25.3, 25.3, 21.5, 21.4, 14.1; FTIR (NaCl, thin film): 3292, 3051, 2929, 1616, 1473, 1325, 1158, 1093  $\text{cm}^{-1}$ ; HRMS (MM) calc'd for  $[\text{M}+\text{H}]^+$  329.1318, found 329.1314.

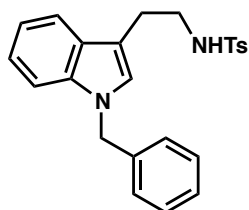

**N-tosyl-N'-benzyltryptamines:** Prepared according to General Procedure B. Reaction run on 5.00 mmol (1.57 g) scale. The crude material was purified by silica gel chromatography (gradient elution, 20-30% EtOAc in Hexane) to afford **20l** as a white, amorphous solid (1.52 g, 3.76 mmol, 75 % yield).  $^1\text{H}$  NMR ( $\text{CDCl}_3$ , 500 MHz)  $\delta$  7.62 (d,  $J$  = 8.3 Hz, 2H), 7.41 (d,  $J$  = 7.9 Hz, 1H), 7.33 – 7.22 (m, 4H), 7.21 – 7.13 (m, 3H), 7.12 – 7.07 (m, 2H), 7.06 – 7.01 (m, 1H), 6.85 (s, 1H), 5.23 (s, 2H), 4.44 (t,  $J$  = 6.1 Hz, 1H), 3.27 (q,  $J$  = 6.6 Hz, 2H), 2.91 (t,  $J$  = 6.7 Hz, 2H), 2.38 (s, 3H);  $^{13}\text{C}$  NMR ( $\text{CDCl}_3$ , 126 MHz)  $\delta$  143.2, 137.3, 136.8, 136.8, 129.6, 128.8, 127.7, 127.5, 127.0, 126.8, 126.5, 122.0, 119.3, 118.7, 110.7, 109.8, 49.9, 43.1, 25.5, 21.5; FTIR (NaCl, thin film): 3284, 3057, 3029, 2922, 1597, 1466, 1326, 1159, 1094, 1076  $\text{cm}^{-1}$ ; HRMS (MM) calc'd for  $[\text{M}+\text{H}]^+$  405.1557, found 405.1630.

## 5. Preparation of diaryliodonium tetrafluoroborates:

**General Procedure C** – To a solution of aryl iodide (1.00 equiv) in  $\text{Ac}_2\text{O}$  (0.5 M) was added *m*CPBA (1.50 equiv). After stirring 1 hour at 23 °C, the mixture was cooled to 0 °C and mesitylene (1.10 equiv) was added followed by dropwise addition of  $\text{HBF}_4$  (50% aq solution, 2.00 equiv). The reaction continued stirring at 0 °C for 30 minutes, followed by 6 hours at 23 °C. The mixture was diluted with water, extracted with  $\text{CH}_2\text{Cl}_2$ , dried over  $\text{MgSO}_4$ , filtered and concentrated *in vacuo*. Crude reaction mixtures were dissolved in minimal  $\text{CH}_2\text{Cl}_2$  and precipitated with  $\text{Et}_2\text{O}$  to yield fine, white powders. The precipitate was filtered and dried overnight under high vacuum at 100 °C.

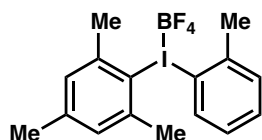

**(2-Methylphenyl)(2,4,6-trimethylphenyl)iodonium tetrafluoroborate (S-1):**

Prepared according to General Procedure C. Reaction run on 10.0 mmol (2.18 g) scale.

Trituration afforded **S-1** as a white powder (3.0 g, 7.1 mmol, 71 % yield).  $^1\text{H}$  NMR (500 MHz, DMSO)  $\delta$  7.96 (d,  $J$  = 7.8 Hz, 1H), 7.56 – 7.54 (m, 2H), 7.29 – 7.23 (m, 1H), 7.21 (s, 2H), 2.56 (s, 6H), 2.56 (s, 3H), 2.29 (s, 3H).  $^{13}\text{C}$  NMR (DMSO, 125 MHz)  $\delta$  143.5, 142.1, 141.2, 137.2, 132.9, 132.4, 130.4, 129.8, 122.3, 119.1, 26.6, 24.9, 21.0. FTIR (NaCl, thin film): 1587, 1558, 1457, 1382, 1301, 1064, 1024. HRMS (MM) calc'd for  $[\text{M}]^+$  337.0448, found 337.0443.

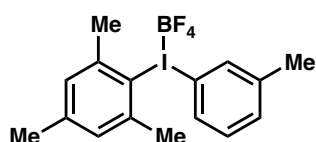

**(3-Methylphenyl)(2,4,6-trimethylphenyl)iodonium tetrafluoroborate (S-2):**

Prepared according to General Procedure C. Reaction run on 10.0 mmol (2.18 g) scale. Trituration afforded **S-2** as a white powder (3.9 g, 9.2 mmol, 92 % yield).

$^1\text{H}$  NMR (500 MHz, DMSO)  $\delta$  7.85 (s, 1H), 7.76 (d,  $J$  = 8.0 Hz, 1H), 7.45 (d,  $J$  = 7.6 Hz, 1H), 7.38 (t,  $J$  = 7.8 Hz, 1H), 7.22 (s, 2H), 2.60 (s, 6H), 2.32 (s, 3H), 2.29 (s, 3H);  $^{13}\text{C}$  NMR (DMSO, 126 MHz)  $\delta$  143.5, 142.45, 142.1, 135.1, 133.0, 132.2, 132.0, 130.3, 122.9, 114.8, 26.8, 21.2, 21.0. FTIR (NaCl, thin film): 2913, 1595, 1558, 1452, 1301, 1063, 1024  $\text{cm}^{-1}$ ; HRMS (MM) calc'd for  $[\text{M}]^+$  337.0448, found 337.0443.

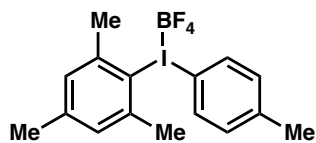

**(4-Methylphenyl)(2,4,6-trimethylphenyl)iodonium tetrafluoroborate (S-3):**

Prepared according to General Procedure C. Reaction run on 10.0 mmol (2.18 g) scale. Trituration afforded **S-3** as a white powder (3.4 g, 8.2 mmol, 80 % yield).

$^1\text{H}$  NMR (500 MHz, DMSO)  $\delta$  7.90 – 7.84 (m, 2H), 7.31 (dd,  $J$  = 8.5, 0.6 Hz, 2H), 7.20 (s, 2H), 2.60 (s, 6H), 2.33 (s, 3H), 2.29 (s, 3H).  $^{13}\text{C}$  NMR (DMSO, 125 MHz)  $\delta$  143.5, 142.7, 141.9, 135.0, 133.0, 130.2, 123.2, 111.4, 26.8, 21.7, 21.0. FTIR (NaCl, thin film): 1586, 1451, 1381, 1064, 1024. HRMS (MM) calc'd for  $[\text{M}]^+$  337.0448, found 447.0446.

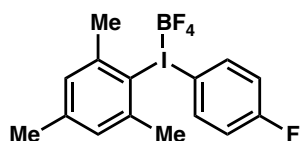

**(4-Fluorophenyl)(2,4,6-trimethylphenyl)iodonium tetrafluoroborate (S-4):**

Prepared according to General Procedure C. Reaction run on 10.0 mmol (2.22 g) scale. Trituration afforded **S-4** as a white powder (1.7 g, 4.1 mmol, 40 % yield).

$^1\text{H}$  NMR (500 MHz, DMSO)  $\delta$  8.08 – 8.01 (m, 2H), 7.40 – 7.34 (m, 2H), 7.22 (s, 2H), 2.60 (s, 6H), 2.30 (s, 3H).  $^{13}\text{C}$  NMR (DMSO, 125 MHz)  $\delta$  164.2 (d,  $J_{\text{C-F}}$  = 250.0 Hz), 143.7, 142.00, 137.8 (d,  $J_{\text{C-F}}$  = 8.75 Hz), 130.3, 123.4, 119.7 (d,  $J_{\text{C-F}}$  = 22.5 Hz), 109.1, 26.8, 21.0; FTIR (NaCl, thin film): 1576, 1482, 1301, 1237, 1165, 1064, 1024  $\text{cm}^{-1}$ ; HRMS (MM) calc'd for  $[\text{M-BF}_4]^+$  341.0197, found 341.0188.

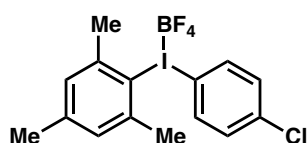

**(4-Chlorophenyl)(2,4,6-trimethylphenyl)iodonium tetrafluoroborate (S-5):**

Prepared according to General Procedure C. Reaction run on 10.0 mmol (2.39 g) scale. Trituration afforded **S-5** as a white powder (1.92 g, 4.3 mmol, 44 % yield).



NMR (500 MHz, DMSO)  $\delta$  7.99 – 7.93 (m, 2H), 7.60 – 7.55 (m, 2H), 7.23 (d,  $J$  = 0.5 Hz, 2H), 2.59 (s, 6H), 2.30 (s, 3H);  $^{13}\text{C}$  NMR (DMSO, 125 MHz)  $\delta$  143.7, 142.1, 137.5, 136.7, 132.3, 130.3, 123.3, 112.8, 26.77, 21.02; FTIR (NaCl, thin film): 1469, 1380, 1301, 1064, 1027  $\text{cm}^{-1}$ ; HRMS (MM) calc'd for  $[\text{M}-\text{BF}_4]^+$  356.9901, found 356.9895.

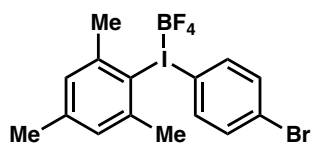

**(4-Bromophenyl)(2,4,6-trimethylphenyl)iodonium tetrafluoroborate (S-6):**

Prepared according to General Procedure C. Reaction run on 10.0 mmol (2.83 g) scale. Trituration afforded **S-6** as a white powder (2.67 g, 5.5 mmol, 55 % yield).  $^1\text{H}$  NMR (500 MHz, DMSO)  $\delta$  7.91 – 7.86 (m, 2H), 7.73 – 7.68 (m, 2H), 7.23 (d,  $J$  = 0.5 Hz, 2H), 2.59 (s, 6H), 2.30 (s, 3H).  $^{13}\text{C}$  NMR (DMSO, 126 MHz)  $\delta$  143.8, 142.1, 136.8, 135.2, 130.3, 126.3, 123.2, 113.5, 26.8, 21.0; FTIR (NaCl, thin film): 1085, 1469, 1388, 1303, 1064 1024  $\text{cm}^{-1}$ ; HRMS (MM) calc'd for  $[\text{M}-\text{BF}_4]^+$  400.9396, found 400.9392.

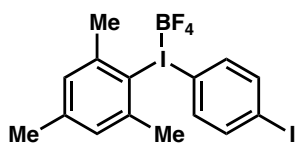

**(4-iodophenyl)(2,4,6-trimethylphenyl)iodonium tetrafluoroborate (S-7):**

Prepared according to General Procedure C. Reaction run on 5.0 mmol (1.24 g) scale. Trituration afforded **S-7** as a white powder (1.59 g, 3.0 mmol, 30 % yield).  $^1\text{H}$  NMR (500 MHz, DMSO)  $\delta$  7.88 – 7.82 (m, 2H), 7.73 – 7.69 (m, 2H), 7.22 (s, 2H), 2.58 (s, 6H), 2.30 (s, 3H);  $^{13}\text{C}$  NMR (DMSO, 125 MHz)  $\delta$  143.71, 142.06, 140.93, 136.50, 130.31, 123.13, 114.38, 100.25, 26.77, 21.02; FTIR (NaCl, thin film): 1464, 1380, 1303, 1064, 1024, 984  $\text{cm}^{-1}$ ; HRMS (MM) calc'd for  $[\text{M}-\text{BF}_4]^+$  448.9258, found 448.9248.

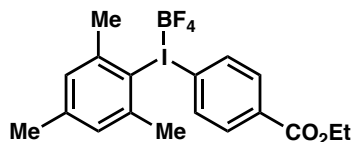

**(4-ethoxycarbonyl)(2,4,6-trimethylphenyl)iodonium tetrafluoroborate (S-8):**

Prepared according to General Procedure C. Reaction run on 10.0 mmol (2.76 g) scale. Trituration afforded **S-8** as a white powder (2.20 g, 4.6 mmol, 46 % yield).  $^1\text{H}$  NMR (500 MHz, DMSO)  $\delta$  8.11 – 8.05 (m, 2H), 8.02 – 7.96 (m, 2H), 7.24 (d,  $J$  = 0.5 Hz, 2H), 4.32 (q,  $J$  = 7.1 Hz, 2H), 2.59 (s, 6H), 2.30 (s, 3H), 1.30 (t,  $J$  = 7.1 Hz, 3H);  $^{13}\text{C}$  NMR (DMSO, 125 MHz)  $\delta$  165.03, 143.8, 142.2, 135.2, 133.1, 132.4, 130.4, 123.2, 119.8, 62.0, 26.8, 21.0, 14.5; FTIR (NaCl, thin film): 2984, 1719, 1583, 1449, 1395, 1365, 1277, 1064, 1024  $\text{cm}^{-1}$ ; HRMS (MM) calc'd for  $[\text{M}-\text{BF}_4]^+$  395.0502, found 395.0493.

## 5. Preparation of *N*-tosylpyrroloindolines (19, 21-22):

**General Procedure D** – To a flame-dried flask was charged the appropriate *N*-tosyltryptamine derivative (0.300 mmol, 1.0 equiv), the appropriate iodonium (0.330 mmol, 1.1 equiv),  $\text{Cu}(\text{OAc})_2$  or  $\text{Cu}(\text{OTf})_2$  (0.030 mmol or 0.060 mmol, 0.10 equiv or 0.20 mmol) and  $\text{CH}_2\text{Cl}_2$  (3.0 mL). The reaction was stirred for the time indicated, at



which point the reaction was diluted with CH<sub>2</sub>Cl<sub>2</sub> (10 mL), and quenched with saturated aq. NaHCO<sub>3</sub> (15 mL). The organic layer was separated and washed with additional NaHCO<sub>3</sub> (2 x 15 mL) and the resulting aqueous layers were then combined and back extracted with CH<sub>2</sub>Cl<sub>2</sub> (15 mL). The organic layers were combined, dried over anhydrous Na<sub>2</sub>SO<sub>4</sub>, filtered, and concentrated *in vacuo*. The crude residue was purified by flash chromatography (SiO<sub>2</sub> or basic alumina) to afford the *N*-tosylpyrroloindoline as a white or off-white solid.

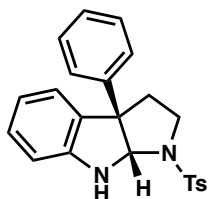

**Pyrroloindoline 19a:** Prepared according to General Procedure D using 10 mol% Cu(OAc)<sub>2</sub> for 4 hours. Reaction run on 0.30 mmol (94 mg) scale. The crude material was purified on basic alumina (gradient elution, 40% THF in hexanes) to afford **19a** as a white, amorphous solid (72.6 mg, 0.19 mmol, 62 % yield).

<sup>1</sup>H NMR (CDCl<sub>3</sub>, 500 MHz) δ 7.76 – 7.71 (m, 2H), 7.30 (dd, *J* = 8.5, 0.6 Hz, 2H), 7.25 – 7.15 (m, 3H), 7.14 – 7.09 (m, 3H), 7.00 (ddd, *J* = 7.4, 1.1, 0.5 Hz, 1H), 6.80 – 6.74 (m, 1H), 6.70 (dd, *J* = 7.8, 0.6 Hz, 1H), 5.43 (s, 1H), 4.91 (s, 1H), 3.65 (ddd, *J* = 10.6, 7.8, 1.4 Hz, 1H), 3.25 (td, *J* = 11.0, 5.6 Hz, 1H), 2.48 (ddd, *J* = 12.4, 5.6, 1.0 Hz, 1H), 2.44 (s, 3H), 2.34 (ddd, *J* = 12.4, 11.3, 7.9 Hz, 1H). <sup>13</sup>C NMR (CDCl<sub>3</sub>, 126 MHz) δ 148.8, 143.6, 143.0, 136.3, 131.4, 129.8, 128.8, 128.6, 127.0, 127.0, 125.7, 123.9, 119.6, 110.1, 85.6, 61.8, 48.1, 37.3, 21.5. FTIR (NaCl, thin film): 3366, 2978, 2878, 1610, 1595, 1491, 1466, 1332, 1318, 1303, 1159, 1094. HRMS (MM) calc'd for [M+H]<sup>+</sup> 391.1475, found 391.1473.

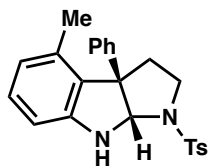

**Pyrroloindoline 21a:** Prepared according to General Procedure D using 10 mol% Cu(OAc)<sub>2</sub> for 6 hours. Reaction run on 0.30 mmol (98.5 mg) scale. The crude material was purified on basic alumina (gradient elution, 40% THF in Hexane) to afford **21a** as a white foam (99.4 mg, 0.25 mmol, 82 % yield).

<sup>1</sup>H NMR (CDCl<sub>3</sub>, 500 MHz) δ 7.78 – 7.70 (m, 2H), 7.30 (dd, *J* = 8.5, 0.6 Hz, 2H), 7.24 – 7.15 (m, 3H), 7.12 – 7.08 (m, 2H), 6.95 (dd, *J* = 6.5, 0.8 Hz, 1H), 6.89 – 6.82 (m, 1H), 6.72 (dd, *J* = 7.4, 7.4 Hz, 1H), 5.47 (s, 1H), 4.70 (s, 1H), 3.67 (ddd, *J* = 10.5, 7.8, 1.5 Hz, 1H), 3.24 (ddd, *J* = 10.9, 10.9, 5.6 Hz, 1H), 2.47 (ddd, *J* = 12.4, 5.6, 1.1 Hz, 1H), 2.44 (s, 3H), 2.35 (ddd, *J* = 12.4, 11.2, 7.8 Hz, 1H), 2.16 (s, 3H). <sup>13</sup>C NMR (CDCl<sub>3</sub>, 126 MHz) δ 147.4, 143.6, 143.1, 136.5, 130.8, 129.8, 129.7, 128.6, 126.98, 126.94, 125.7, 121.4, 119.7, 119.5, 85.5, 62.2, 48.2, 37.6, 21.5, 16.7. FTIR (NaCl, thin film): 3351, 3059, 2892, 1595, 1447, 1332, 1153, 1089. HRMS (MM) calc'd for [M+H]<sup>+</sup> 405.1631, found 405.1629.

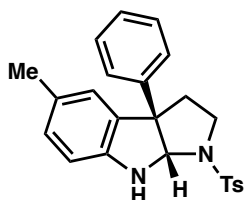

**Pyrroloindoline 21b:** Prepared according to General Procedure D using 10 mol% Cu(OAc)<sub>2</sub> for 6 hours. Reaction run on 0.30 mmol (98.5 mg) scale. The crude material

was purified on basic alumina (gradient elution, 40% THF in Hexane) to afford **21b** as a white, amorphous solid (76.6 mg, 0.19 mmol, 63 % yield).

$^1\text{H}$  NMR ( $\text{CDCl}_3$ , 500 MHz)  $\delta$  7.73 (d,  $J$  = 8.3 Hz, 2H), 7.29 (d,  $J$  = 8.0 Hz, 2H), 7.25 – 7.16 (m, 3H), 7.15 – 7.10 (m, 2H), 6.91 (dd,  $J$  = 7.9, 1.0 Hz, 1H), 6.79 (d,  $J$  = 0.4 Hz, 1H), 6.61 (d,  $J$  = 7.9 Hz, 1H), 5.41 (s, 1H), 3.64 (ddd,  $J$  = 10.5, 7.8, 1.3 Hz, 1H), 3.25 (ddd,  $J$  = 11.0, 11.0, 5.6 Hz, 1H), 2.50 – 2.38 (m, 1H), 2.43 (s, 3H), 2.32 (ddd,  $J$  = 12.3, 11.3, 7.9 Hz, 1H), 2.22 (s, 3H).  $^{13}\text{C}$  NMR ( $\text{CDCl}_3$ , 126 MHz)  $\delta$  146.4, 143.5, 143.1, 136.3, 131.7, 129.8, 129.2, 129.0, 128.6, 126.97, 126.95, 125.7, 124.4, 110.1, 85.9, 61.8, 48.1, 37.1, 21.5, 20.9. FTIR (NaCl, thin film): 3385, 2922, 1617, 1597, 1496, 1448, 1340, 1159, 1093. HRMS (MM) calc'd for  $[\text{M}+\text{H}]^+$  405.1631, found 405.1644.

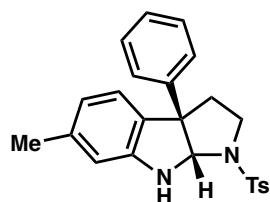

**Pyrroloindoline 21c:** Prepared according to General Procedure D using 10 mol%  $\text{Cu}(\text{OAc})_2$  for 6 hours. Reaction run on 0.30 mmol (98.5 mg) scale. The crude material was purified on basic alumina (gradient elution, 40% THF in Hexane) to afford **21c** as a white foam (61.0 mg, 0.15 mmol, 50 % yield).

$^1\text{H}$  NMR ( $\text{CDCl}_3$ , 500 MHz)  $\delta$  7.77 – 7.70 (m, 2H), 7.30 (dd,  $J$  = 8.5, 0.6 Hz, 2H), 7.25 – 7.14 (m, 3H), 7.13 – 7.07 (m, 2H), 6.88 (d,  $J$  = 7.6 Hz, 1H), 6.59 (ddd,  $J$  = 7.6, 1.4, 0.7 Hz, 1H), 6.55 – 6.51 (m, 1H), 5.41 (s, 1H), 4.83 (s, 1H), 3.64 (ddd,  $J$  = 10.6, 7.8, 1.4 Hz, 1H), 3.27 (ddd,  $J$  = 11.0, 11.0, 5.6 Hz, 1H), 2.49 – 2.41 (m, 1H), 2.44 (s, 3H), 2.31 (ddd,  $J$  = 7.9, 6.9, 5.7 Hz, 1H), 2.28 (s, 3H).  $^{13}\text{C}$  NMR ( $\text{CDCl}_3$ , 126 MHz)  $\delta$  149.0, 143.6, 143.2, 138.8, 136.4, 129.8, 128.6, 128.6, 127.0, 126.9, 125.7, 123.6, 120.4, 111.0, 85.9, 61.6, 48.2, 37.3, 21.5, 21.5. FTIR (NaCl, thin film): 3353, 2889, 1595, 1490, 1448, 1331, 1307, 1159, 1119, 1092. HRMS (MM) calc'd for  $[\text{M}+\text{H}]^+$  405.1631, found 405.1609.

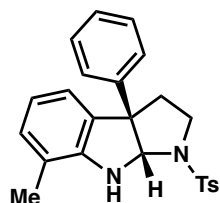

**Pyrroloindoline 21d:** Prepared according to General Procedure D using 10 mol%  $\text{Cu}(\text{OAc})_2$  for 6 hours. Reaction run on 0.30 mmol (98.5 mg) scale. The crude material was purified on basic alumina (gradient elution, 40% THF in Hexane) to afford **21d** as a white, crystalline solid (69.2 mg, 0.17 mmol, 57% yield).

$^1\text{H}$  NMR ( $\text{CDCl}_3$ , 500 MHz)  $\delta$  7.81 – 7.70 (m, 2H), 7.30 (d,  $J$  = 7.9 Hz, 2H), 7.25 – 7.15 (m, 3H), 7.13 – 7.07 (m, 2H), 6.95 (d,  $J$  = 7.4 Hz, 1H), 6.86 (d,  $J$  = 7.1 Hz, 1H), 6.72 (dd,  $J$  = 7.4, 7.4 Hz, 1H), 5.47 (s, 1H), 4.70 (s, 1H), 3.67 (ddd,  $J$  = 10.5, 7.8, 1.4 Hz, 1H), 3.24 (ddd,  $J$  = 10.9, 10.9, 5.6 Hz, 1H), 2.47 (ddd,  $J$  = 12.4, 5.6, 1.1 Hz, 1H), 2.44 (s, 3H), 2.35 (ddd,  $J$  = 12.4, 11.2, 7.8 Hz, 1H), 2.16 (s, 3H);  $^{13}\text{C}$  NMR ( $\text{CDCl}_3$ , 126 MHz)  $\delta$  147.4, 143.6, 143.1, 136.5, 130.8, 129.8, 129.7, 128.6, 127.0, 126.9, 125.7, 121.4, 119.7, 119.5, 85.5, 62.2, 48.2, 37.6, 21.5, 16.7; FTIR (NaCl, thin film): 3350, 2892, 1594, 1490,

1465, 1448, 1331, 1319, 1305, 1243, 1151, 1109, 1089  $\text{cm}^{-1}$ ; HRMS (MM) calc'd for  $[\text{M}+\text{H}]^+$  405.1631, found 405.1590.

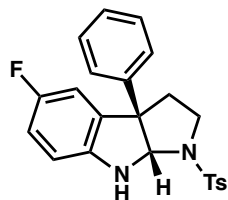

**Pyrroloindoline 21e:** Prepared according to General Procedure D using 10 mol%  $\text{Cu}(\text{OAc})_2$  for 24 hours. Reaction run on 0.30 mmol (99.7 mg) scale. The crude material was purified on basic alumina (gradient elution, 40% THF in Hexane) to afford **21e** as a white, crystalline solid (80.1 mg, 0.20 mmol, 65 % yield).  $^1\text{H}$  NMR ( $\text{CDCl}_3$ , 500 MHz)  $\delta$  7.73 (d,  $J$  = 8.3 Hz, 2H), 7.30 (d,  $J$  = 8.0 Hz, 2H), 7.26 – 7.17 (m, 3H), 7.15 – 7.08 (m, 2H), 6.82 (ddd,  $J$  = 8.9, 8.9, 2.6 Hz, 1H), 6.71 (dd,  $J$  = 8.2, 2.6 Hz, 1H), 6.63 (dd,  $J$  = 8.5, 4.2 Hz, 1H), 5.43 (s, 1H), 3.65 (ddd,  $J$  = 10.5, 7.8, 1.4 Hz, 1H), 3.27 (ddd,  $J$  = 10.9, 10.9, 5.7 Hz, 1H), 2.48 – 2.39 (m, 1H), 2.44 (s, 3H), 2.33 (ddd,  $J$  = 12.5, 11.2, 7.9 Hz, 1H).  $^{13}\text{C}$  NMR ( $\text{CDCl}_3$ , 126 MHz)  $\delta$  157.4 (d,  $J_{\text{C-F}}$  = 235.0 Hz), 144.7, 143.7, 142.3, 136.1, 133.3 (d,  $J_{\text{C-F}}$  = 7.5 Hz), 129.9, 128.7, 127.3, 127.0, 125.6, 115.2 (d,  $J_{\text{C-F}}$  = 22.5 Hz), 111.2 (d,  $J_{\text{C-F}}$  = 23.8 Hz), 110.8 (d,  $J_{\text{C-F}}$  = 7.5 Hz), 86.2, 62.0, 48.0, 37.0, 21.5. FTIR (NaCl, thin film): 3365, 2891, 1996, 1593, 1488, 1448, 1329, 1306, 1154, 1091. HRMS (MM) calc'd for  $[\text{M}+\text{H}]^+$  409.1381, found 409.1375.

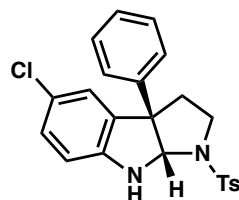

**Pyrroloindoline 21f:** Prepared according to General Procedure D using 10 mol%  $\text{Cu}(\text{OAc})_2$  for 24 hours. Reaction run on 0.30 mmol (105 mg) scale. The crude material was purified on basic alumina (gradient elution, 40% THF in Hexane) to afford **21f** as a white, crystalline solid (81.7 mg, 0.19 mmol, 64 % yield).

$^1\text{H}$  NMR ( $\text{CDCl}_3$ , 500 MHz)  $\delta$  7.74 – 7.69 (m, 2H), 7.29 (dd,  $J$  = 8.5, 0.6 Hz, 2H), 7.27 – 7.19 (m, 3H), 7.13 – 7.09 (m, 2H), 7.06 (dd,  $J$  = 8.3, 2.1 Hz, 1H), 6.93 (d,  $J$  = 2.1 Hz, 1H), 6.62 (d,  $J$  = 8.3 Hz, 1H), 5.44 (s, 1H), 4.95 (s, 1H), 3.64 (ddd,  $J$  = 10.6, 7.8, 1.5 Hz, 1H), 3.27 (ddd,  $J$  = 11.0, 11.0, 5.6 Hz, 1H), 2.50 – 2.40 (m, 1H), 2.43 (s, 3H), 2.33 (ddd,  $J$  = 12.5, 11.2, 7.9 Hz, 1H).  $^{13}\text{C}$  NMR ( $\text{CDCl}_3$ , 126 MHz)  $\delta$  147.3, 143.8, 142.3, 136.1, 133.6, 129.9, 128.8, 128.7, 127.3, 126.9, 125.5, 124.1, 111.0, 85.8, 61.8, 48.0, 37.0, 21.5. FTIR (NaCl, thin film): 3386, 3059, 2971, 1598, 1481, 1447, 1336, 1258, 1158, 1090 1037. HRMS (MM) calc'd for  $[\text{M}+\text{H}]^+$  425.1085, found 425.1083.

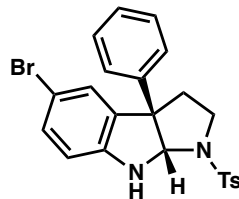

**Pyrroloindoline 21g:** Prepared according to General Procedure D using 10 mol%  $\text{Cu}(\text{OAc})_2$  for 24 hours. Reaction run on 0.30 mmol (118.0 g) scale. The crude material was purified on basic alumina (gradient elution, 40% THF in Hexane) to afford **21g** as a white, crystalline solid (82.1 mg, 0.18 mmol, 58 % yield).  $^1\text{H}$  NMR ( $\text{CDCl}_3$ , 500 MHz)  $\delta$  7.75 – 7.69 (m, 2H), 7.29 (dd,  $J$  = 8.5, 0.6 Hz, 2H), 7.27 – 7.18 (m, 4H), 7.10 (dd,  $J$  = 8.1, 1.5 Hz, 2H), 7.06 (d,  $J$  = 2.0 Hz, 1H), 6.58 (d,  $J$  = 8.3 Hz, 1H), 5.43 (s, 1H), 4.96 (s, 1H), 3.64 (ddd,  $J$  = 10.7, 7.8, 1.5 Hz, 1H), 3.27 (ddd,

$J = 11.0, 11.0, 5.6$  Hz, 1H), 2.48 – 2.44 (m, 1H), 2.43 (s, 3H), 2.33 (ddd,  $J = 8.2, 6.4, 4.8$  Hz, 1H).  $^{13}\text{C}$  NMR ( $\text{CDCl}_3$ , 126 MHz) 147.8, 143.8, 142.3, 136.1, 134.1, 131.5, 129.9, 128.7, 127.3, 126.9, 126.9, 125.5, 111.5, 111.1, 85.7, 61.8, 48.0, 37.0, 21.5. FTIR (NaCl, thin film): 3386, 3059, 2971, 1598, 1477, 1336, 1258, 1093, 1037. HRMS (MM) calc'd for  $[\text{M}+\text{H}]^+$  469.0580, found 469.0578.

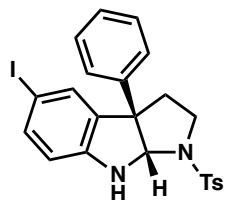

**Pyrroloindoline 21h:** Prepared according to General Procedure D using 10 mol%  $\text{Cu}(\text{OAc})_2$  for 24 hours. Reaction run on 0.30 mmol (132.1 mg) scale. The crude material was purified on basic alumina (gradient elution, 40% THF in Hexane) to afford **21h** as a white, amorphous solid (92.6 mg, 0.19 mmol, 62 % yield).  $^1\text{H}$  NMR ( $\text{CDCl}_3$ , 500 MHz)  $\delta$  7.67 (d,  $J = 8.3$  Hz, 2H), 7.33 (dd,  $J = 8.2, 1.8$  Hz, 1H), 7.25 (d,  $J = 7.9$  Hz, 2H), 7.23 – 7.15 (m, 4H), 7.08 – 7.03 (m, 2H), 6.45 (d,  $J = 8.3$  Hz, 1H), 5.38 (d,  $J = 6.8$  Hz, 1H), 4.93 (s, 1H), 3.59 (ddd,  $J = 10.6, 7.8, 1.5$  Hz, 1H), 3.23 (ddd,  $J = 10.9, 10.9, 5.6$  Hz, 1H), 2.45 – 2.35 (m, 1H), 2.39 (s, 3H), 2.28 (ddd,  $J = 12.5, 11.2, 7.8$  Hz, 1H);  $^{13}\text{C}$  NMR ( $\text{CDCl}_3$ , 126 MHz)  $\delta$  148.4, 143.6, 142.4, 137.4, 136.1, 134.6, 132.6, 129.9, 128.7, 127.3, 126.9, 125.5, 112.2, 85.5, 80.3, 61.6, 48.0, 37.0, 21.5. FTIR (NaCl, thin film): 3385, 3057, 2968, 1597, 1476, 1446, 1420, 1334, 1260, 1159, 1093  $\text{cm}^{-1}$ ; HRMS (MM) calc'd for  $[\text{M}+\text{H}]^+$  517.0441, found 517.0436.

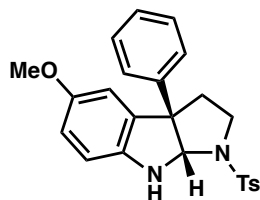

**Pyrroloindoline 21i:** Prepared according to General Procedure D using 10 mol%  $\text{Cu}(\text{OAc})_2$  for 6 hours. Reaction run on 0.30 mmol (103.3 mg) scale. The crude material was purified on basic alumina (gradient elution, 40% THF in Hexane) to afford **21i** as a white, amorphous solid (72.6 mg, 0.19 mmol, 62 % yield).  $^1\text{H}$  NMR ( $\text{CDCl}_3$ , 500 MHz)  $\delta$  7.76 – 7.70 (m, 2H), 7.30 (d,  $J = 7.9$  Hz, 2H), 7.25 – 7.15 (m, 3H), 7.15 – 7.08 (m, 2H), 6.69 (dd,  $J = 8.5, 2.5$  Hz, 1H), 6.64 (d,  $J = 8.4$  Hz, 1H), 6.60 (d,  $J = 2.5$  Hz, 1H), 5.40 (s, 1H), 4.71 (s, 1H), 3.71 (s, 3H), 3.65 (ddd,  $J = 10.5, 7.8, 1.3$  Hz, 1H), 3.25 (ddd,  $J = 11.0, 11.0, 5.6$  Hz, 1H), 2.49 – 2.44 (m, 1H), 2.43 (s, 3H), 2.32 (ddd,  $J = 12.4, 11.3, 7.9$  Hz, 1H);  $^{13}\text{C}$  NMR ( $\text{CDCl}_3$ , 126 MHz) 153.9, 143.6, 142.7, 142.6, 136.3, 133.0, 129.8, 128.6, 127.1, 127.0, 125.7, 113.6, 110.8, 110.6, 86.3, 62.1, 55.8, 48.1, 37.0, 21.5; FTIR (NaCl, thin film): 3380, 3057, 3025, 2947, 2832, 1598, 1492, 1336, 1159, 1093, 1035; HRMS (MM) calc'd for  $[\text{M}+\text{H}]^+$  421.1580, found 421.1577.

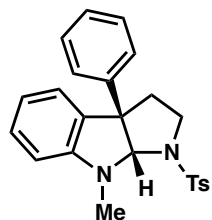

**Pyrroloindoline 21k:** Prepared according to General Procedure D using 10 mol%  $\text{Cu}(\text{OAc})_2$  for 24 hours. Reaction run on 0.30 mmol (98.5 mg) scale. The crude material was purified on basic alumina (gradient elution, 20 – 25% THF in Hexane) to afford **21k** as a white, solid (65.1 mg, 0.16 mmol, 54% yield).  $^1\text{H}$  NMR ( $\text{CDCl}_3$ , 500 MHz)  $\delta$  7.71 – 7.65 (m, 2H), 7.23 (d,  $J = 8.0$  Hz, 2H), 7.20 – 7.17 (m, 3H), 7.17 – 7.13 (m, 1H), 6.96 – 6.89 (m, 2H), 6.85 (dd,  $J$

= 7.3, 1.1 Hz, 1H), 6.67 (ddd,  $J = 7.4, 7.4, 0.8$  Hz, 1H), 6.50 (d,  $J = 7.9$  Hz, 1H), 5.53 (s, 1H), 3.76 (ddd,  $J = 12.1, 7.0, 1.0$  Hz, 1H), 3.13 (ddd,  $J = 11.9, 11.9, 5.2$  Hz, 1H), 3.06 (s, 3H), 2.44 (s, 3H), 2.21 (ddd,  $J = 12.2, 5.0, 1.2$  Hz, 1H), 2.05 (ddd,  $J = 12.0, 12.0, 7.1$  Hz, 1H);  $^{13}\text{C}$  NMR ( $\text{CDCl}_3$ , 126 MHz) 150.5, 143.6, 143.0, 136.5, 132.2, 129.7, 128.8, 128.4, 127.2, 126.7, 125.9, 123.62, 117.8, 106.2, 91.9, 61.1, 48.8, 38.0, 31.2, 21.5; FTIR (NaCl, thin film): 3056, 3027, 2949, 2891, 2827, 1762, 1605, 1491, 1347, 1160, 1092, 1022  $\text{cm}^{-1}$ ; HRMS (MM) calc'd for  $[\text{M}+\text{H}]^+$  405.1631, found 405.1600.

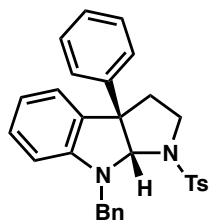

**Pyrroloindoline 21I:** Prepared according to General Procedure D using 10 mol%  $\text{Cu}(\text{OAc})_2$  for 24 hours. Reaction run on 0.30 mmol (121 mg) scale. The crude material was purified on basic alumina (gradient elution, 20 – 25% THF in Hexane) to afford **21I** as a white foam (83.4 mg, 0.17 mmol, 58% yield).  $^1\text{H}$  NMR ( $\text{CDCl}_3$ , 500 MHz)  $\delta$  7.64 – 7.52 (m, 2H), 7.41 – 7.36 (m, 2H), 7.36 – 7.30 (m, 2H), 7.29 – 7.24 (m, 1H), 7.19 – 7.12 (m, 5H), 7.09 – 7.02 (m, 1H), 6.89 – 6.81 (m, 3H), 6.64 (ddd,  $J = 7.4, 7.4, 0.9$  Hz, 1H), 6.42 (d,  $J = 7.8$  Hz, 1H), 5.69 (s, 1H), 4.89 (d,  $J = 16.4$  Hz, 1H), 4.63 (d,  $J = 16.4$  Hz, 1H), 3.82 (dd,  $J = 12.5, 6.8$  Hz, 1H), 3.25 (ddd,  $J = 12.2, 12.2, 5.1$  Hz, 1H), 2.41 (s, 3H), 2.24 (dd,  $J = 11.9, 4.7$  Hz, 1H), 2.06 (ddd,  $J = 12.1, 12.1, 7.2$  Hz, 1H);  $^{13}\text{C}$  NMR ( $\text{CDCl}_3$ , 126 MHz)  $\delta$  149.7, 143.6, 143.5, 138.5, 136.4, 132.2, 129.7, 128.7, 128.4, 128.4, 127.3, 127.2, 126.9, 126.7, 125.8, 123.9, 117.9, 106.5, 90.7, 61.3, 48.5, 48.1, 38.2, 21.5; FTIR (NaCl, thin film): 3062, 3027, 2898, 1604, 1493, 1346, 1158, 1089  $\text{cm}^{-1}$ ; HRMS (MM) calc'd for  $[\text{M}+\text{H}]^+$  481.1944, found 481.1947.

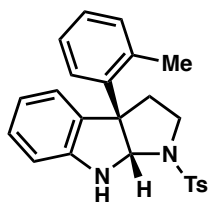

**Pyrroloindoline 22a:** Prepared according to General Procedure D using 20 mol%  $\text{Cu}(\text{OTf})_2$  for 12 hours. Reaction run on 0.30 mmol (94 mg) scale with the symmetric di-*o*-tolyliodonium tetrafluoroborate. The crude material was purified by silica gel chromatography (gradient elution, 20% EtOAc in Hexane) to afford **22a** as a white, amorphous solid (60.6 mg, 0.15 mmol, 50 % yield).  $^1\text{H}$  NMR ( $\text{CDCl}_3$ , 500 MHz)  $\delta$  7.69 – 7.63 (m, 2H), 7.20 (d,  $J = 7.9$  Hz, 2H), 7.14 – 7.04 (m, 4H), 7.03 – 6.98 (m, 1H), 6.92 (dd,  $J = 7.4, 0.8$  Hz, 1H), 6.76 (ddd,  $J = 7.4, 7.4, 1.0$  Hz, 1H), 6.65 (d,  $J = 7.8$  Hz, 1H), 5.67 (s, 1H), 4.94 (s, 1H), 3.59 (ddd,  $J = 10.1, 7.7, 4.0$  Hz, 1H), 3.36 (ddd,  $J = 10.1, 8.6, 6.6$  Hz, 1H), 2.69 (ddd,  $J = 12.9, 7.9, 7.9$  Hz, 1H), 2.40 (s, 3H), 2.39 – 2.34 (m, 1H), 2.03 (s, 3H);  $^{13}\text{C}$  NMR ( $\text{CDCl}_3$ , 126 MHz)  $\delta$  148.4, 143.5, 139.4, 136.4, 135.6, 132.6, 131.9, 129.6, 128.5, 127.2, 127.1, 127.0, 125.7, 124.3, 119.2, 109.4, 84.4, 62.1, 47.4, 37.9, 21.4, 20.8; FTIR (NaCl, thin film): 3390, 3057, 2975, 2883, 1606, 1485, 1338, 1158  $\text{cm}^{-1}$ ; HRMS (MM) calc'd for  $[\text{M}+\text{H}]^+$  405.1631, found 405.1633.

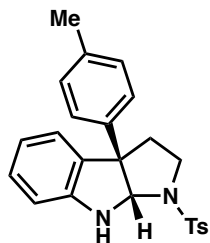

**Pyrroloindoline 22b:** Prepared according to General Procedure D using 20 mol % Cu(OTf)<sub>2</sub> for 12 hours. Reaction run on 0.30 mmol (94 mg) scale. The crude material was purified by silica gel chromatography (gradient elution, 20% EtOAc in Hexane) to afford **22b** as a white, amorphous solid (90.0 mg, 0.22 mmol, 74 % yield). <sup>1</sup>H NMR (CDCl<sub>3</sub>, 500 MHz) δ 7.76 – 7.71 (m, 2H), 7.30 (dd, *J* = 8.5, 0.6 Hz, 2H), 7.11 (ddd, *J* = 7.7, 7.7, 1.3 Hz, 1H), 7.04 (dd, *J* = 4.7, 4.0 Hz, 2H), 6.99 (ddd, *J* = 3.8, 3.8, 1.6 Hz, 3H), 6.77 (ddd, *J* = 7.4, 1.0 Hz, 1H), 6.70 (d, *J* = 7.8 Hz, 1H), 5.39 (s, 1H), 3.64 (ddd, *J* = 10.6, 7.8, 1.4 Hz, 1H), 3.25 (ddd, *J* = 10.9, 10.9, 5.6 Hz, 1H), 2.51 – 2.40 (m, 1H), 2.44 (s, 3H), 2.37 – 2.29 (m, 1H), 2.28 (s, 3H); <sup>13</sup>C NMR (CDCl<sub>3</sub>, 126 MHz) δ 148.7, 143.6, 140.0, 136.7, 136.31, 131.6, 129.8, 129.2, 128.7, 127.0, 125.6, 123.8, 120.0, 110.1, 85.7, 61.5, 48.1, 37.3, 21.5, 20.9; FTIR (NaCl, thin film): 3395, 3052, 3022, 2913, 1607, 1465, 1336, 1159, 1094, 1035 cm<sup>-1</sup>; HRMS (MM) calc'd for [M+H]<sup>+</sup> 405.1631, found 405.1624.

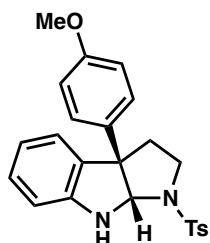

**Pyrroloindoline 22c:** Prepared according to General Procedure D using 20 mol % Cu(OTf)<sub>2</sub> for 4 hours. Reaction run on 0.30 mmol (94 mg) scale. The crude material was purified by silica gel chromatography (gradient elution, 6:3:1 Hexanes:CH<sub>2</sub>Cl<sub>2</sub>:Acetone) to afford **22c** as a white foam (88.1 mg, 0.21 mmol, 70 % yield). <sup>1</sup>H NMR (CDCl<sub>3</sub>, 500 MHz) δ 7.75 – 7.70 (m, 2H), 7.30 (dd, *J* = 8.5, 0.6 Hz, 2H), 7.11 (ddd, *J* = 7.9, 7.4, 1.3 Hz, 1H), 7.04 – 6.96 (m, 3H), 6.80 – 6.72 (m, 3H), 6.71 – 6.67 (m, 1H), 5.36 (s, 1H), 4.89 (br s, 1H), 3.74 (s, 3H), 3.63 (ddd, *J* = 10.6, 7.8, 1.5 Hz, 1H), 3.23 (td, *J* = 10.9, 5.6 Hz, 1H), 2.47 – 2.40 (m, 1H), 3.2.44 (s, 3H) 2.32 (ddd, *J* = 12.4, 11.2, 7.8 Hz, 1H); <sup>13</sup>C NMR (CDCl<sub>3</sub>, 126 MHz) δ 158.5, 148.77, 143.6, 136.3, 135.0, 131.7, 129.8, 128.7, 127.0, 126.8, 123.8, 119.6, 113.9, 110.1, 85.8, 61.2, 55.2, 48.2, 37.3, 21.5; FTIR (NaCl, thin film): 3390, 3047, 2953, 2834, 1608, 1512, 1483, 1466, 1336, 1251, 1183, 1159, 1094 cm<sup>-1</sup>; HRMS (MM) calc'd for [M+H]<sup>+</sup> 421.1580, found 421.1580.

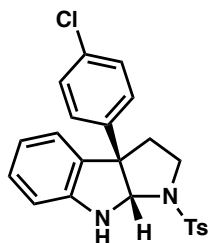

**Pyrroloindoline 22d:** Prepared according to General Procedure D using 20 mol % Cu(OTf)<sub>2</sub> for 12 hours. Reaction run on 0.30 mmol (94 mg) scale. The crude material was purified on basic alumina (gradient elution, 40% THF in Hexane) to afford **22d** as a white, amorphous solid (86.5 mg, 0.20 mmol, 68 % yield). <sup>1</sup>H NMR (CDCl<sub>3</sub>, 500 MHz) δ 7.76 – 7.69 (m, 2H), 7.30 (dd, *J* = 8.5, 0.6 Hz, 2H), 7.21 – 7.15 (m, 2H), 7.15 – 7.09 (m, 1H), 7.06 – 7.00 (m, 2H), 6.95 (ddd, *J* = 7.4, 1.2, 0.5 Hz, 1H), 6.77 (ddd, *J* = 7.4, 7.4, 1.0 Hz, 1H), 6.70 (dd, *J* = 4.5, 4.0 Hz, 1H), 5.37 (s, 1H), 4.91 (br s, 1H), 3.65 (ddd, *J* = 10.7, 7.8, 1.5 Hz, 1H), 3.24 (ddd, *J* = 11.0, 11.0, 5.6 Hz, 1H), 2.51 – 2.40 (m, 1H), 2.44 (s, 3H), 2.28 (ddd, *J* = 12.4, 11.2, 7.8 Hz, 1H); <sup>13</sup>C NMR (CDCl<sub>3</sub>, 126 MHz) δ 148.7, 143.7, 141.5, 136.2, 132.9, 131.0, 129.9, 129.0, 128.7, 127.1, 126.9, 123.7, 119.7, 110.2, 85.6, 61.3, 48.1, 37.1, 21.5; FTIR

(NaCl, thin film): 3386, 3051, 2970, 2893, 1607, 1493, 1466, 1483, 1399, 1336, 1159, 1093  $\text{cm}^{-1}$ ; HRMS (MM) calc'd for  $[\text{M}+\text{H}]^+$  425.1085, found 425.1077.

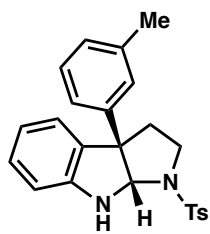

**Pyrroloindoline 22e:** Prepared according to General Procedure D using 20 mol %  $\text{Cu}(\text{OTf})_2$  for 12 hours. Reaction run on 0.30 mmol (94 mg) scale. The crude material was purified by silica gel chromatography (gradient elution, 20% EtOAc in Hexane) to afford **22e** as a white, amorphous solid (75.2 mg, 0.19 mmol, 63% yield).  $^1\text{H}$  NMR ( $\text{CDCl}_3$ , 500 MHz)  $\delta$  7.77 – 7.72 (m, 2H), 7.31 (d,  $J = 7.9$  Hz, 2H), 7.14 – 7.08 (m, 2H), 7.02 – 6.97 (m, 2H), 6.92 – 6.86 (m, 2H), 6.77 (ddd,  $J = 7.4, 7.4, 1.0$  Hz, 1H), 6.70 (d,  $J = 7.8$  Hz, 1H), 5.42 (s, 1H), 3.66 (ddd,  $J = 10.6, 7.8, 1.4$  Hz, 1H), 3.25 (ddd,  $J = 11.0, 11.0, 5.6$  Hz, 1H), 2.49 – 2.45 (m, 1H), 2.44 (s, 3H), 2.32 (ddd,  $J = 12.5, 11.4, 7.9$  Hz, 1H), 2.25 (s, 3H);  $^{13}\text{C}$  NMR ( $\text{CDCl}_3$ , 126 MHz)  $\delta$  148.8, 143.6, 143.0, 138.2, 136.4, 131.4, 129.9, 128.7, 128.4, 127.8, 127.0, 126.3, 124.0, 122.8, 119.6, 110.1, 85.7, 61.8, 48.2, 37.6, 21.5, 21.5; FTIR (NaCl, thin film): 3390, 2047, 2970, 1607, 1483, 1466, 1340, 1159, 1094  $\text{cm}^{-1}$ ; HRMS (MM) calc'd for  $[\text{M}+\text{H}]^+$  405.1631, found 405.1626.

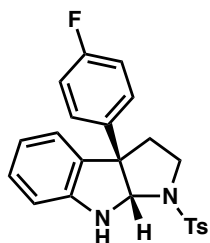

**Pyrroloindoline 22f:** Prepared according to General Procedure D using 20 mol %  $\text{Cu}(\text{OTf})_2$  for 12 hours. Reaction run on 0.30 mmol (94 mg) scale. The crude material was purified on basic alumina (gradient elution, 40% THF in Hexane) to afford **22f** as a white, amorphous solid (80.3 mg, 0.20 mmol, 66 % yield).  $^1\text{H}$  NMR ( $\text{CDCl}_3$ , 500 MHz)  $\delta$  7.77 – 7.70 (m, 2H), 7.30 (dd,  $J = 8.5, 0.6$  Hz, 2H), 7.16 – 7.09 (m, 1H), 7.09 – 7.04 (m, 2H), 6.97 (ddd,  $J = 7.4, 1.2, 0.5$  Hz, 1H), 6.93 – 6.86 (m, 2H), 6.78 (ddd,  $J = 7.4, 7.4, 1.0$  Hz, 1H), 6.70 (d,  $J = 7.8$  Hz, 1H), 5.38 (s, 1H), 3.66 (ddd,  $J = 10.6, 7.8, 1.4$  Hz, 1H), 3.24 (ddd,  $J = 11.0, 11.0, 5.6$  Hz, 1H), 2.49 – 2.42 (m, 1H), 2.44 (s, 3H), 2.30 (ddd,  $J = 12.4, 11.2, 7.8$  Hz, 1H);  $^{13}\text{C}$  NMR ( $\text{CDCl}_3$ , 126 MHz)  $\delta$  161.6 (d,  $J_{\text{C-F}} = 245.0$  Hz), 148.7, 143.7, 138.7, 138.7, 136.2, 131.3, 129.8, 128.9, 127.3 (d,  $J_{\text{C-F}} = 7.5$  Hz), 126.9, 123.7, 119.7, 115.3 (d,  $J_{\text{C-F}} = 20.0$  Hz), 110.2, 109.9, 85.7, 61.2, 48.1, 37.3, 21.5; FTIR (NaCl, thin film): 3391, 3051, 2970, 2892, 1607, 1510, 1483, 1466, 1400, 1336, 1233, 1160, 1095  $\text{cm}^{-1}$ ; HRMS (MM) calc'd for  $[\text{M}+\text{H}]^+$  409.1381, found 409.1363.

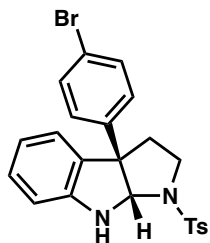

**Pyrroloindoline 22g:** Prepared according to General Procedure D using 20 mol %  $\text{Cu}(\text{OTf})_2$  for 12 hours. Reaction run on 0.30 mmol (94 mg) scale. Reaction run on 0.30 mmol (94 mg) scale. The crude material was purified on basic alumina (gradient elution, 40% THF in Hexane) to afford **22g** as a white, amorphous solid (83.4 mg, 0.19 mmol, 59 % yield).  $^1\text{H}$  NMR ( $\text{CDCl}_3$ , 500 MHz)  $\delta$  7.76 – 7.69 (m, 2H), 7.36 – 7.28 (m, 4H), 7.12 (ddd,  $J = 7.7, 7.7, 1.2$  Hz, 1H), 7.00 – 6.92 (m, 3H), 6.77 (ddd,  $J = 7.4, 7.4, 1.0$  Hz, 1H), 6.70 (d,  $J = 7.8$  Hz, 1H), 5.37 (s, 1H), 4.91



(s, 1H), 3.65 (ddd,  $J = 10.7, 7.8, 1.4$  Hz, 1H), 3.24 (ddd,  $J = 10.9, 10.9, 5.6$  Hz, 1H), 2.49 – 2.40 (m, 1H), 2.44 (s, 3H), 2.27 (ddd,  $J = 12.4, 11.2, 7.9$  Hz, 1H);  $^{13}\text{C}$  NMR ( $\text{CDCl}_3$ , 126 MHz)  $\delta$  148.6, 143.7, 142.0, 136.1, 131.6, 130.9, 129.9, 129.0, 127.5, 126.9, 123.71, 121.0, 119.7, 110.2, 85.5, 61.4, 48.1, 37.0, 21.5; FTIR (NaCl, thin film): 3391, 3051, 2970, 2892, 1608, 1597, 1484, 1466, 1396, 1336, 1159, 1095  $\text{cm}^{-1}$ ; HRMS (MM) calc'd for  $[\text{M}+\text{H}]^+$  469.0580, found 469.0553.

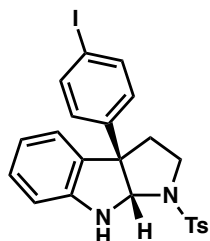

**Pyrroloindoline 22h:** Prepared according to General Procedure D using 20 mol %  $\text{Cu}(\text{OTf})_2$  for 12 hours. Reaction run on 0.30 mmol (94 mg) scale. The crude material was purified on basic alumina (gradient elution, 40% THF in Hexanes) to afford **22h** as a white, amorphous solid (95.8 mg, 0.19 mmol, 62 % yield).  $^1\text{H}$  NMR ( $\text{CDCl}_3$ , 500 MHz)  $\delta$  7.75 – 7.69 (m, 2H), 7.55 – 7.51 (m, 2H), 7.30 (d,  $J = 7.9$  Hz, 2H), 7.12 (ddd,  $J = 7.7, 7.7, 1.2$  Hz, 1H), 6.96 – 6.92 (m, 1H), 6.88 – 6.83 (m, 2H), 6.76 (ddd,  $J = 7.4, 7.4, 1.0$  Hz, 1H), 6.70 (d,  $J = 7.8$  Hz, 1H), 5.35 (s, 1H), 3.64 (ddd,  $J = 10.7, 7.8, 1.4$  Hz, 1H), 3.24 (ddd,  $J = 11.0, 11.0, 5.6$  Hz, 1H), 2.49 – 2.39 (m, 1H), 2.44 (s, 3H), 2.26 (ddd,  $J = 12.4, 11.2, 7.9$  Hz, 1H);  $^{13}\text{C}$  NMR ( $\text{CDCl}_3$ , 126 MHz)  $\delta$  148.7, 143.8, 142.8, 137.6, 136.2, 130.9, 129.9, 129.0, 127.7, 126.9, 123.7, 119.8, 110.3, 92.5, 85.5, 61.5, 48.1, 36.9, 21.6; FTIR (NaCl, thin film): 3390, 3047, 2948, 2878, 1612, 1486, 1336, 1158, 1005  $\text{cm}^{-1}$ ; HRMS (MM) calc'd for  $[\text{M}+\text{H}]^+$  517.0441, found 517.0424.

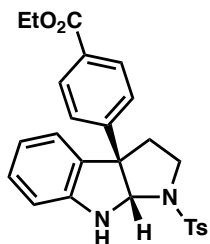

**Pyrroloindoline 22i:** Prepared according to General Procedure D using 20 mol %  $\text{Cu}(\text{OTf})_2$  for 12 hours. Reaction run on 0.30 mmol (94.0 mg) scale. The crude material was purified by silica gel chromatography (gradient elution, 6:3:1 Hexanes:DCM:Acetone) to afford **22i** as a colorless oil (78.2 mg, 0.17 mmol, 56 % yield).  $^1\text{H}$  NMR ( $\text{CDCl}_3$ , 500 MHz)  $\delta$  7.91 – 7.85 (m, 2H), 7.75 – 7.69 (m, 2H), 7.29 (dd,  $J = 8.5, 0.6$  Hz, 2H), 7.21 – 7.15 (m, 2H), 7.14 – 7.08 (m, 1H), 6.96 (ddd,  $J = 7.4, 1.2, 0.5$  Hz, 1H), 6.76 (ddd,  $J = 7.5, 7.5, 1.0$  Hz, 1H), 6.71 (dd,  $J = 7.2, 0.7$  Hz, 1H), 5.43 (s, 1H), 4.92 (s, 1H), 4.34 (q,  $J = 7.1$  Hz, 2H), 3.66 (ddd,  $J = 10.7, 7.8, 1.4$  Hz, 1H), 3.26 (ddd,  $J = 11.0, 11.0, 5.6$  Hz, 1H), 2.49 (ddd,  $J = 12.3, 5.5, 1.0$  Hz, 1H), 2.43 (s, 3H), 2.31 (ddd,  $J = 12.4, 11.3, 7.9$  Hz, 1H), 1.36 (t,  $J = 7.1$  Hz, 3H);  $^{13}\text{C}$  NMR ( $\text{CDCl}_3$ , 126 MHz)  $\delta$  166.1, 148.7, 148.0, 143.8, 136.2, 130.9, 129.9, 129.9, 129.7, 129.0, 126.9, 125.63, 123.8, 119.7, 110.2, 85.4, 61.8, 60.9, 48.1, 37.1, 21.5, 14.3; FTIR (NaCl, thin film): 3387, 3052, 2979, 2895, 1713, 1610, 1483, 1467, 1343, 1278, 1160, 1110  $\text{cm}^{-1}$ . HRMS (MM) calc'd for  $[\text{M}+\text{H}]^+$  463.1686, found 463.1666.



## 6. Catalyst Efficiency and Scalability

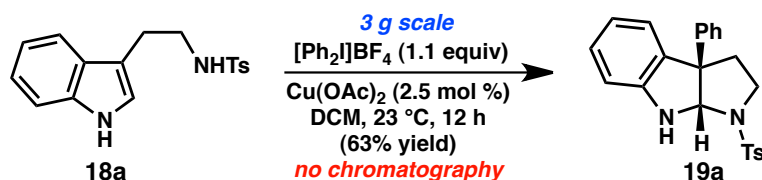

To a flame-dried, 100 mL flask was charged *N*-tosyltryptamine (3.15 g, 10.0 mmol, 1.0 equiv),  $\text{Ph}_2\text{IBF}_4$  (4.04 g, 11.0 mmol, 1.1 equiv) and  $\text{Cu}(\text{OAc})_2$  (45.4 mg, 0.25 mmol, 0.025 equiv). The dissolved in 50 mL  $\text{CH}_2\text{Cl}_2$  and allowed to stir at room temperature for 12 hours at which point the reaction was diluted with  $\text{CH}_2\text{Cl}_2$  (100 mL), washed with saturated aqueous  $\text{NaHCO}_3$  (2 x 50 mL) and the resulting aqueous layers were then combined and back extracted with  $\text{CH}_2\text{Cl}_2$  (50 mL). The organic layers were combined, dried over anhydrous  $\text{Na}_2\text{SO}_4$ , filtered, and concentrated *in vacuo*. The resultant yellow solid was dissolved in 50 mL  $\text{CH}_2\text{Cl}_2$ , 100 mL  $\text{Et}_2\text{O}$  and 200 mL hexanes to afford a light yellow powder. The powder was filtered and dried under vacuum to give **19a** (2.55g, 6.5 mmol, 65% yield).

## References

- <sup>1</sup> Still, W. C., Kahn, M. & Mitra, A. Rapid chromatographic technique for preparative separations with moderate resolution. *J. Org. Chem.* **43**, 2923-2925 (1978).

KVC12-161

Sample Name:  
KVC12-161  
Data Collected on:  
indy.caltech.edu-inova500  
Archive directory:  
/home/kangway/vnmrsys/data  
Sample directory:  
KVC12-161  
FidFile: PROTON01

Pulse Sequence: PROTON (s2pul)  
Solvent: cdcl3  
Data collected on: Apr 23 2012

Sample #9, Operator: kangway

Relax. delay 5.000 sec  
Pulse 45.0 degrees  
Acq. time 2.500 sec  
Width 8000.0 Hz  
32 repetitions  
OBSERVE H1, 499.7127408 MHz  
DATA PROCESSING  
Line broadening 0.2 Hz  
FT size 65536  
Total time 4 min 0 sec

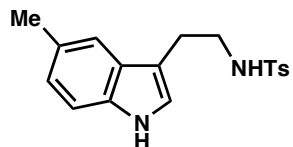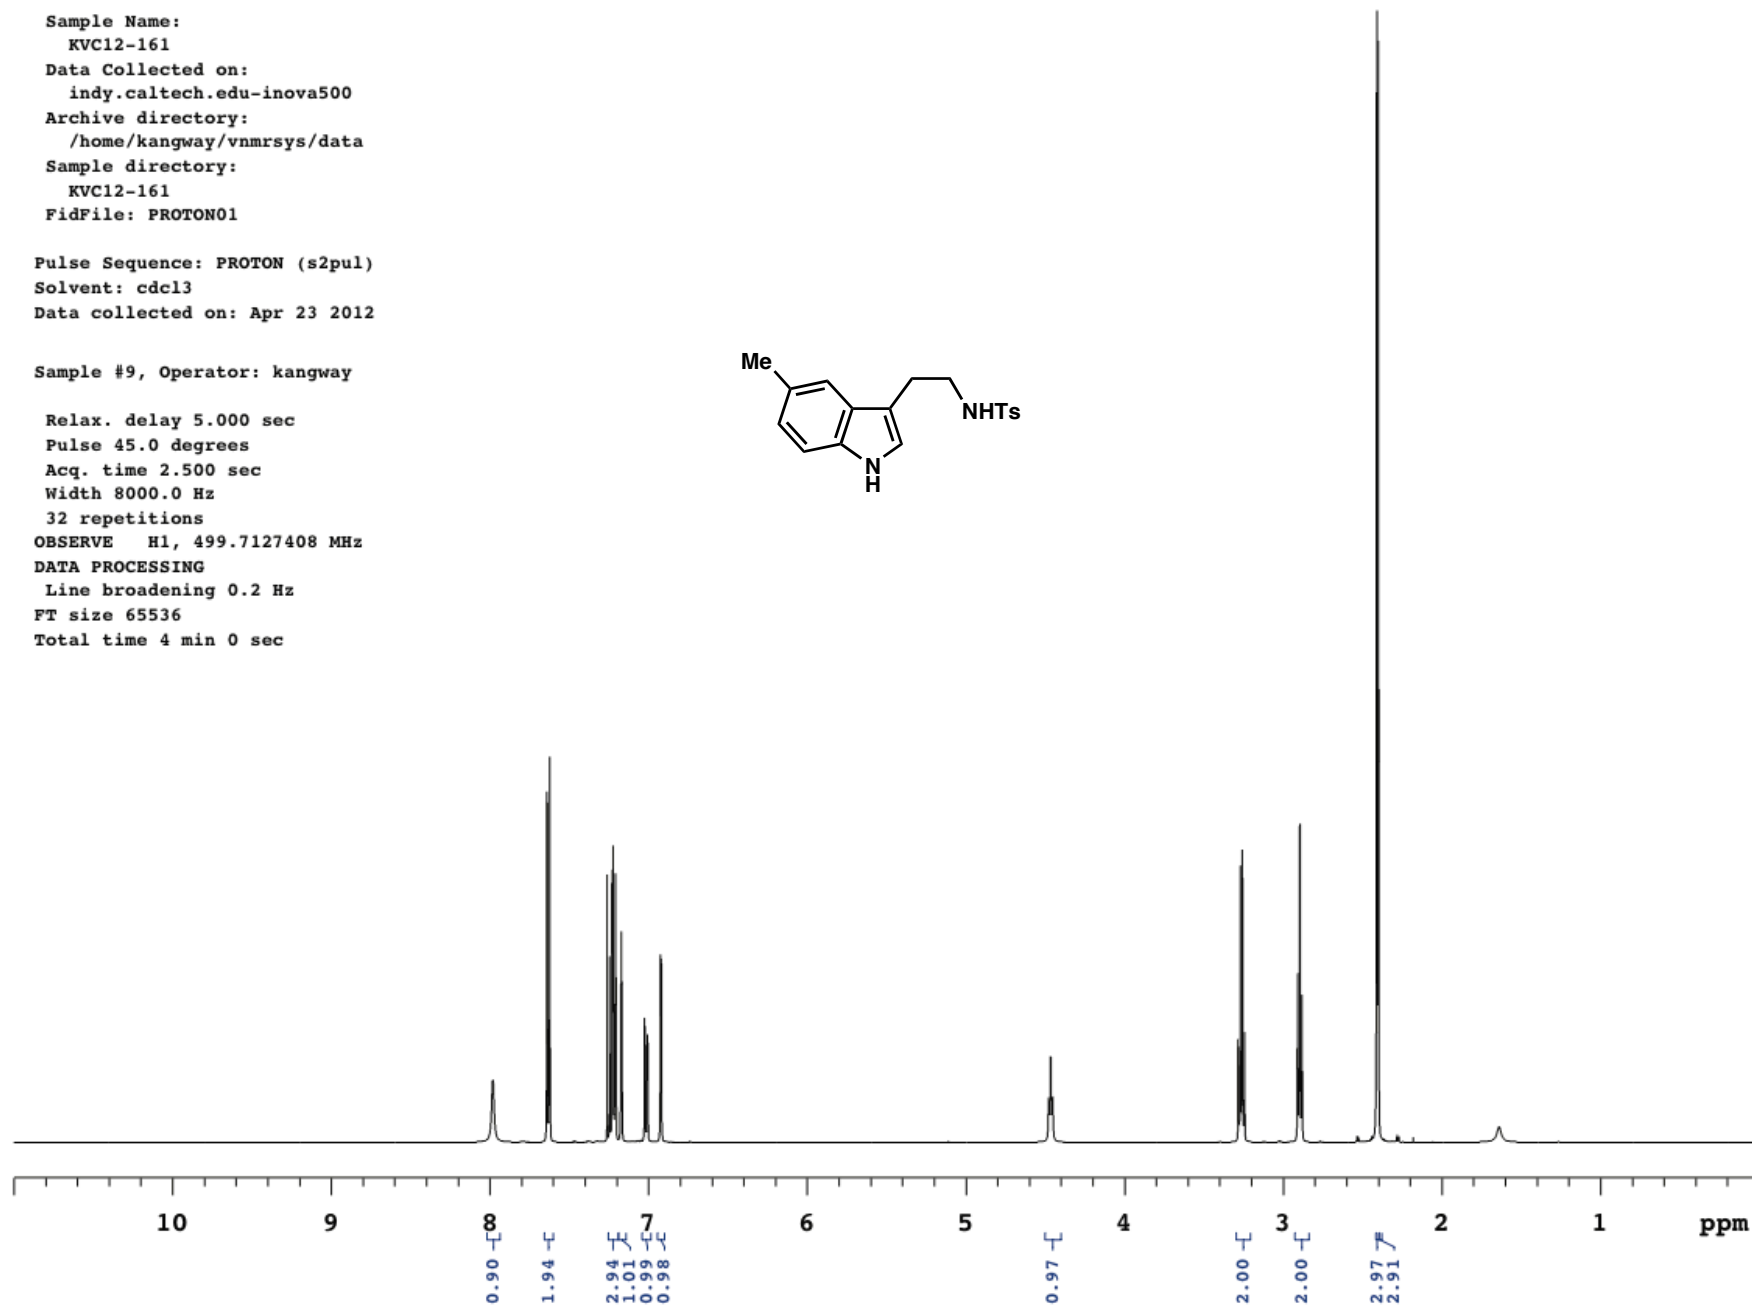

KVC12-161

Sample Name:

KVC12-161

Data Collected on:

indy.caltech.edu-inova500

Archive directory:

/home/kangway/vnmrsys/data

Sample directory:

KVC12-161

FidFile: CARBON01

Pulse Sequence: CARBON (s2pul)

Solvent: cdcl3

Data collected on: Apr 23 2012

Sample #9, Operator: kangway

Relax. delay 1.000 sec

Pulse 45.0 degrees

Acq. time 1.042 sec

Width 31446.5 Hz

512 repetitions

OBSERVE C13, 125.6528748 MHz

DECOUPLE H1, 499.7152303 MHz

Power 39 dB

continuously on

WALTZ-16 modulated

DATA PROCESSING

Line broadening 0.5 Hz

FT size 65536

Total time 17 min

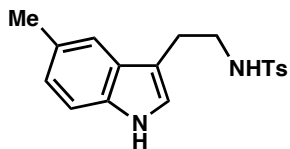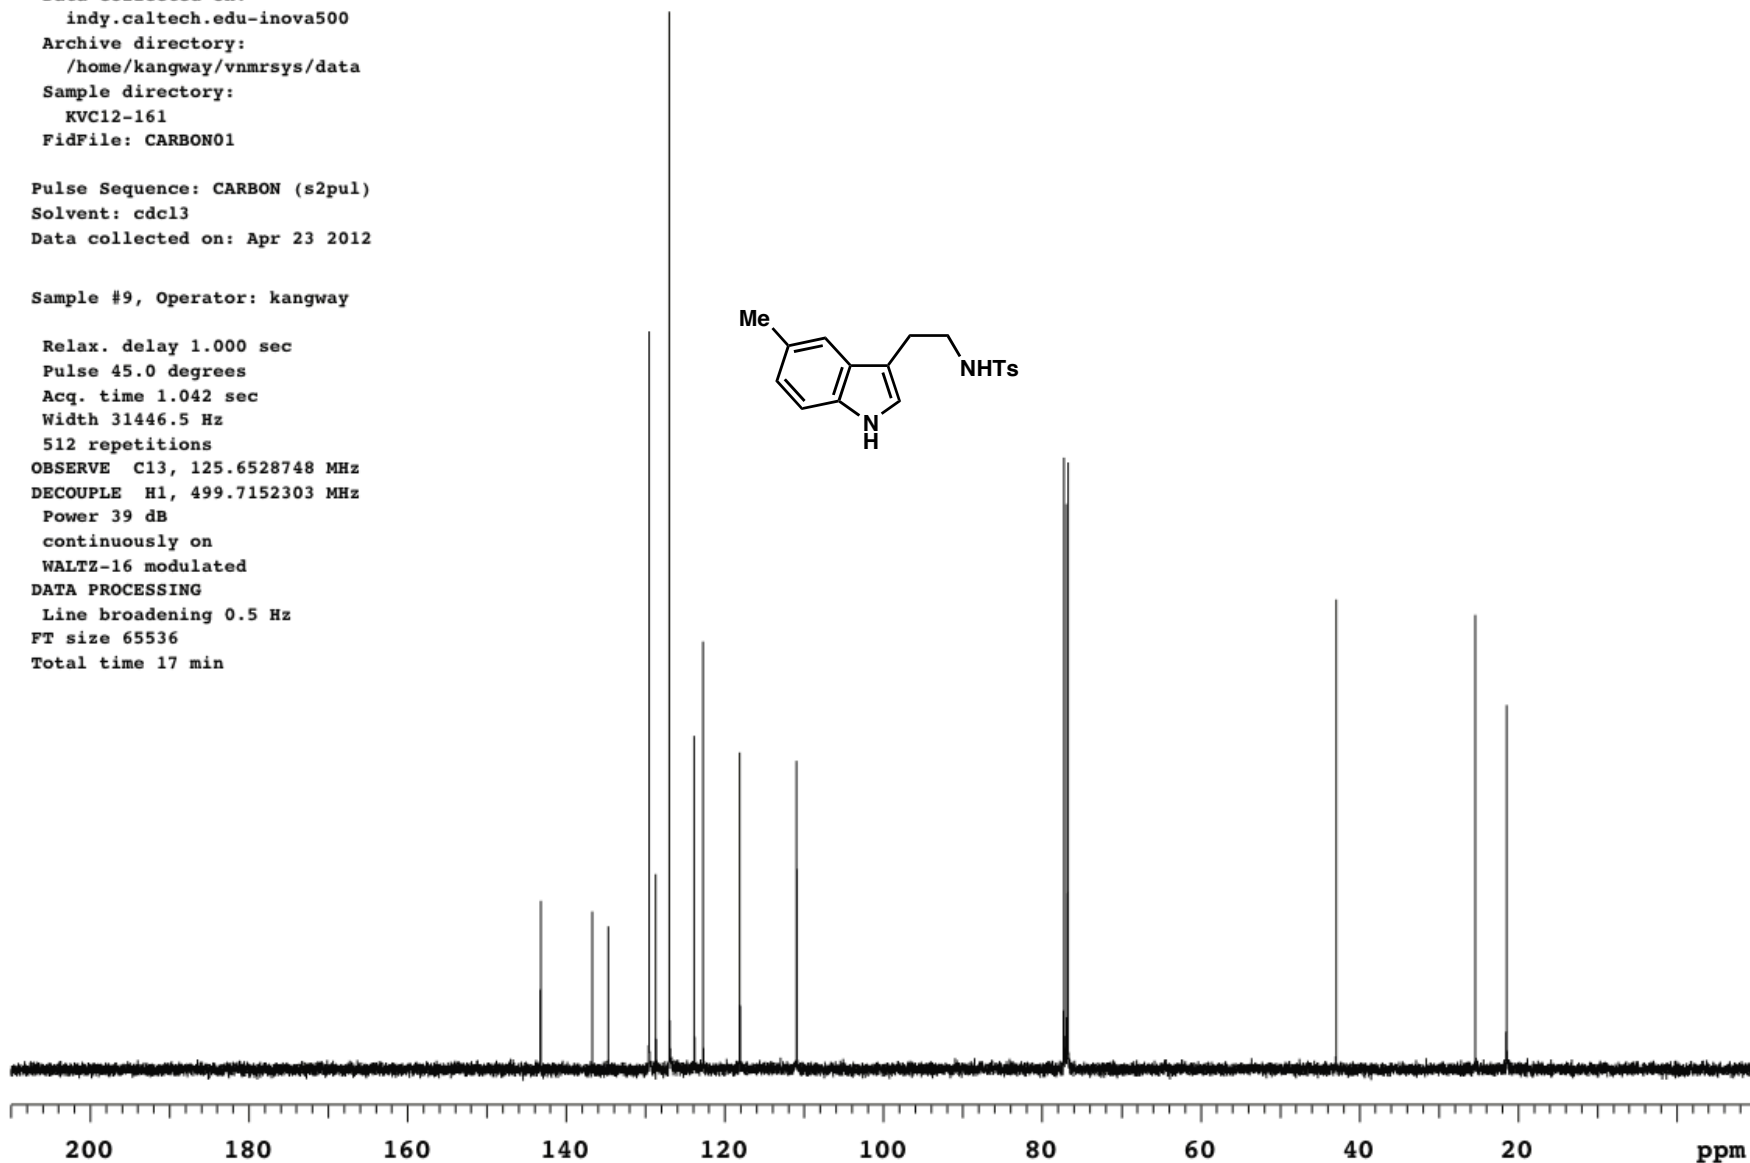

KVC12-221

Sample Name:  
KVC12-221  
Data Collected on:  
indy.caltech.edu-inova500  
Archive directory:  
/home/kangway/vnmrsys/data  
Sample directory:  
KVC12-221  
FidFile: PROTON01

Pulse Sequence: PROTON (s2pul)  
Solvent: cdcl3  
Data collected on: Apr 23 2012

Sample #7, Operator: kangway

Relax. delay 5.000 sec  
Pulse 45.0 degrees  
Acq. time 2.500 sec  
Width 8000.0 Hz  
32 repetitions  
OBSERVE H1, 499.7127408 MHz  
DATA PROCESSING  
Line broadening 0.2 Hz  
FT size 65536  
Total time 4 min 0 sec

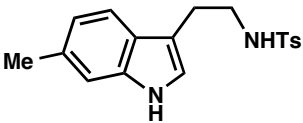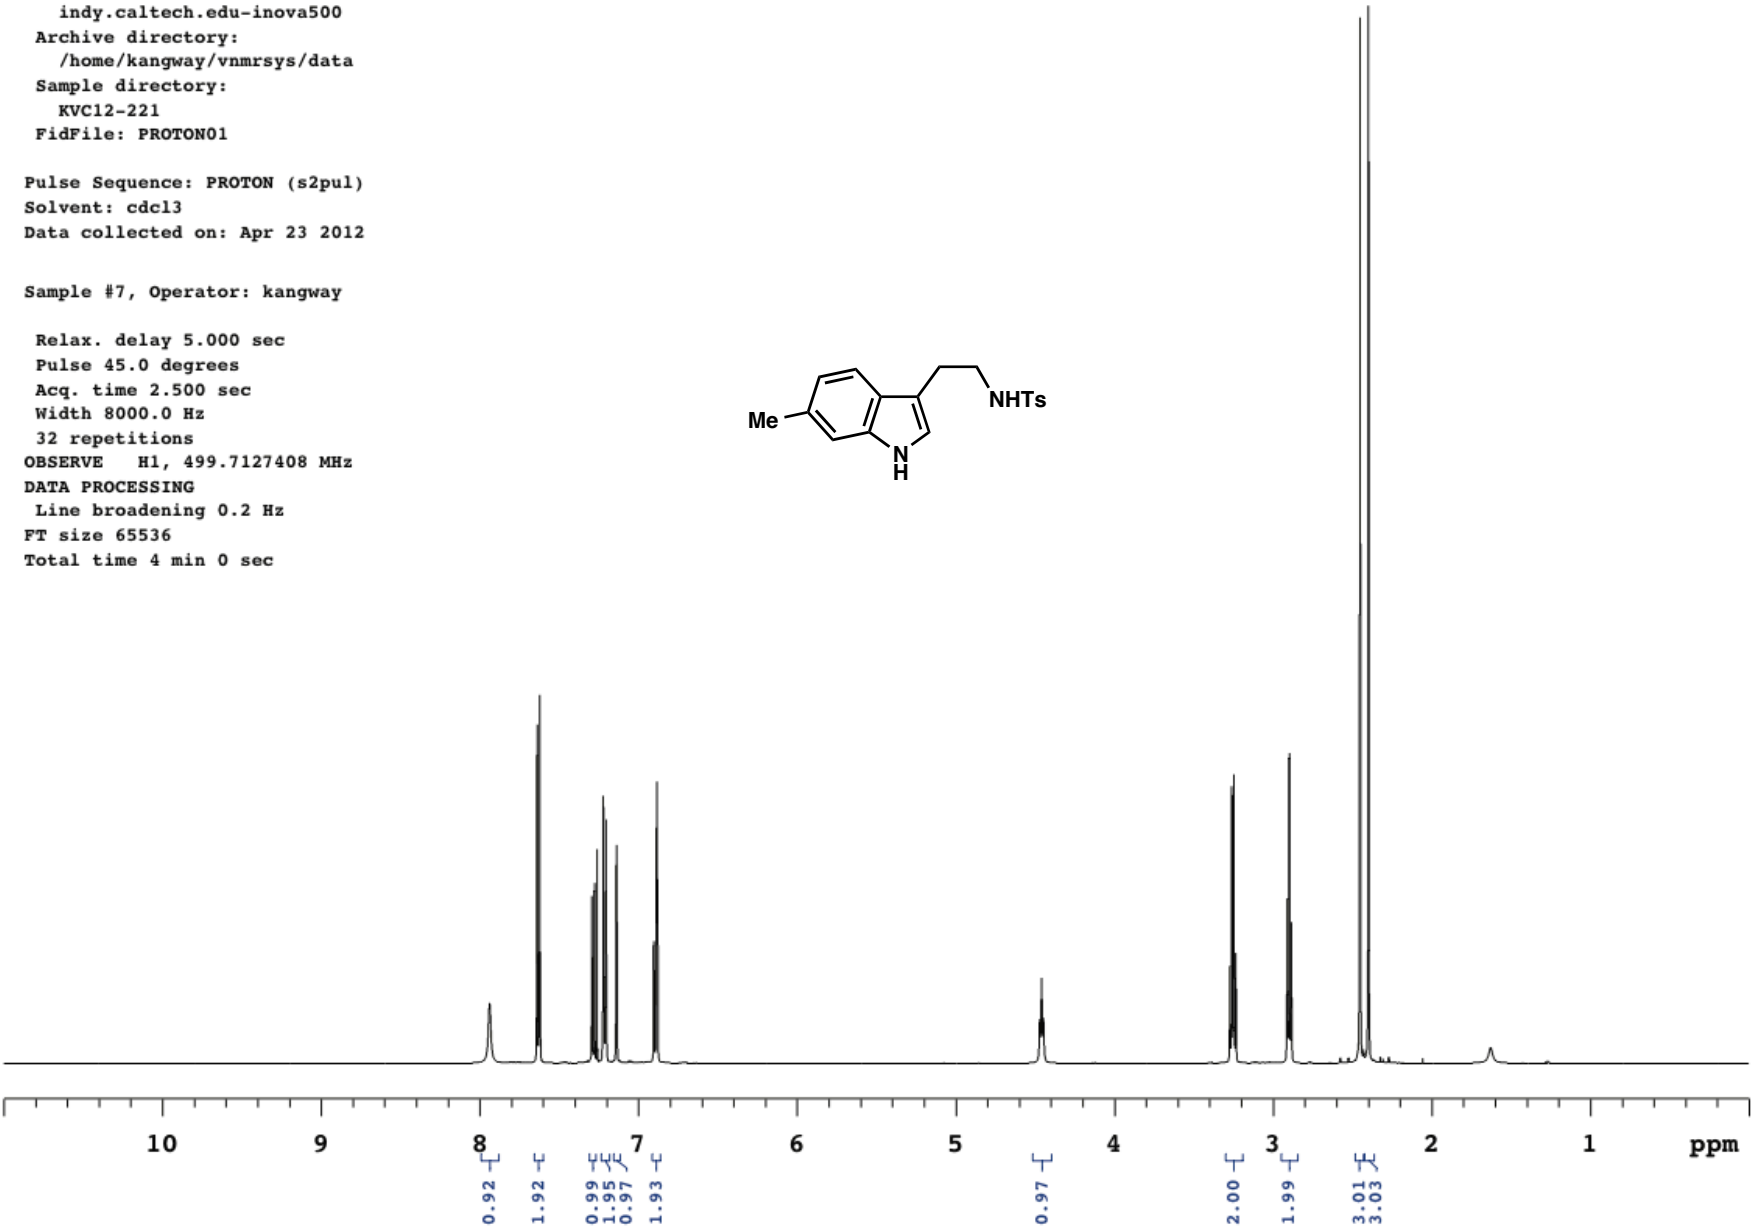

KVC12-221

Sample Name:

KVC12-221

Data Collected on:

indy.caltech.edu-inova500

Archive directory:

/home/kangway/vnmrsys/data

Sample directory:

KVC12-221

FidFile: CARBON01

Pulse Sequence: CARBON (s2pul)

Solvent: cdcl3

Data collected on: Apr 23 2012

Sample #7, Operator: kangway

Relax. delay 1.000 sec

Pulse 45.0 degrees

Acq. time 1.042 sec

Width 31446.5 Hz

512 repetitions

OBSERVE C13, 125.6528739 MHz

DECOUPLE H1, 499.7152303 MHz

Power 39 dB

continuously on

WALTZ-16 modulated

DATA PROCESSING

Line broadening 0.5 Hz

FT size 65536

Total time 17 min

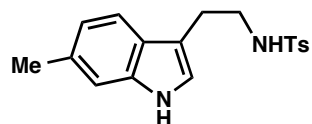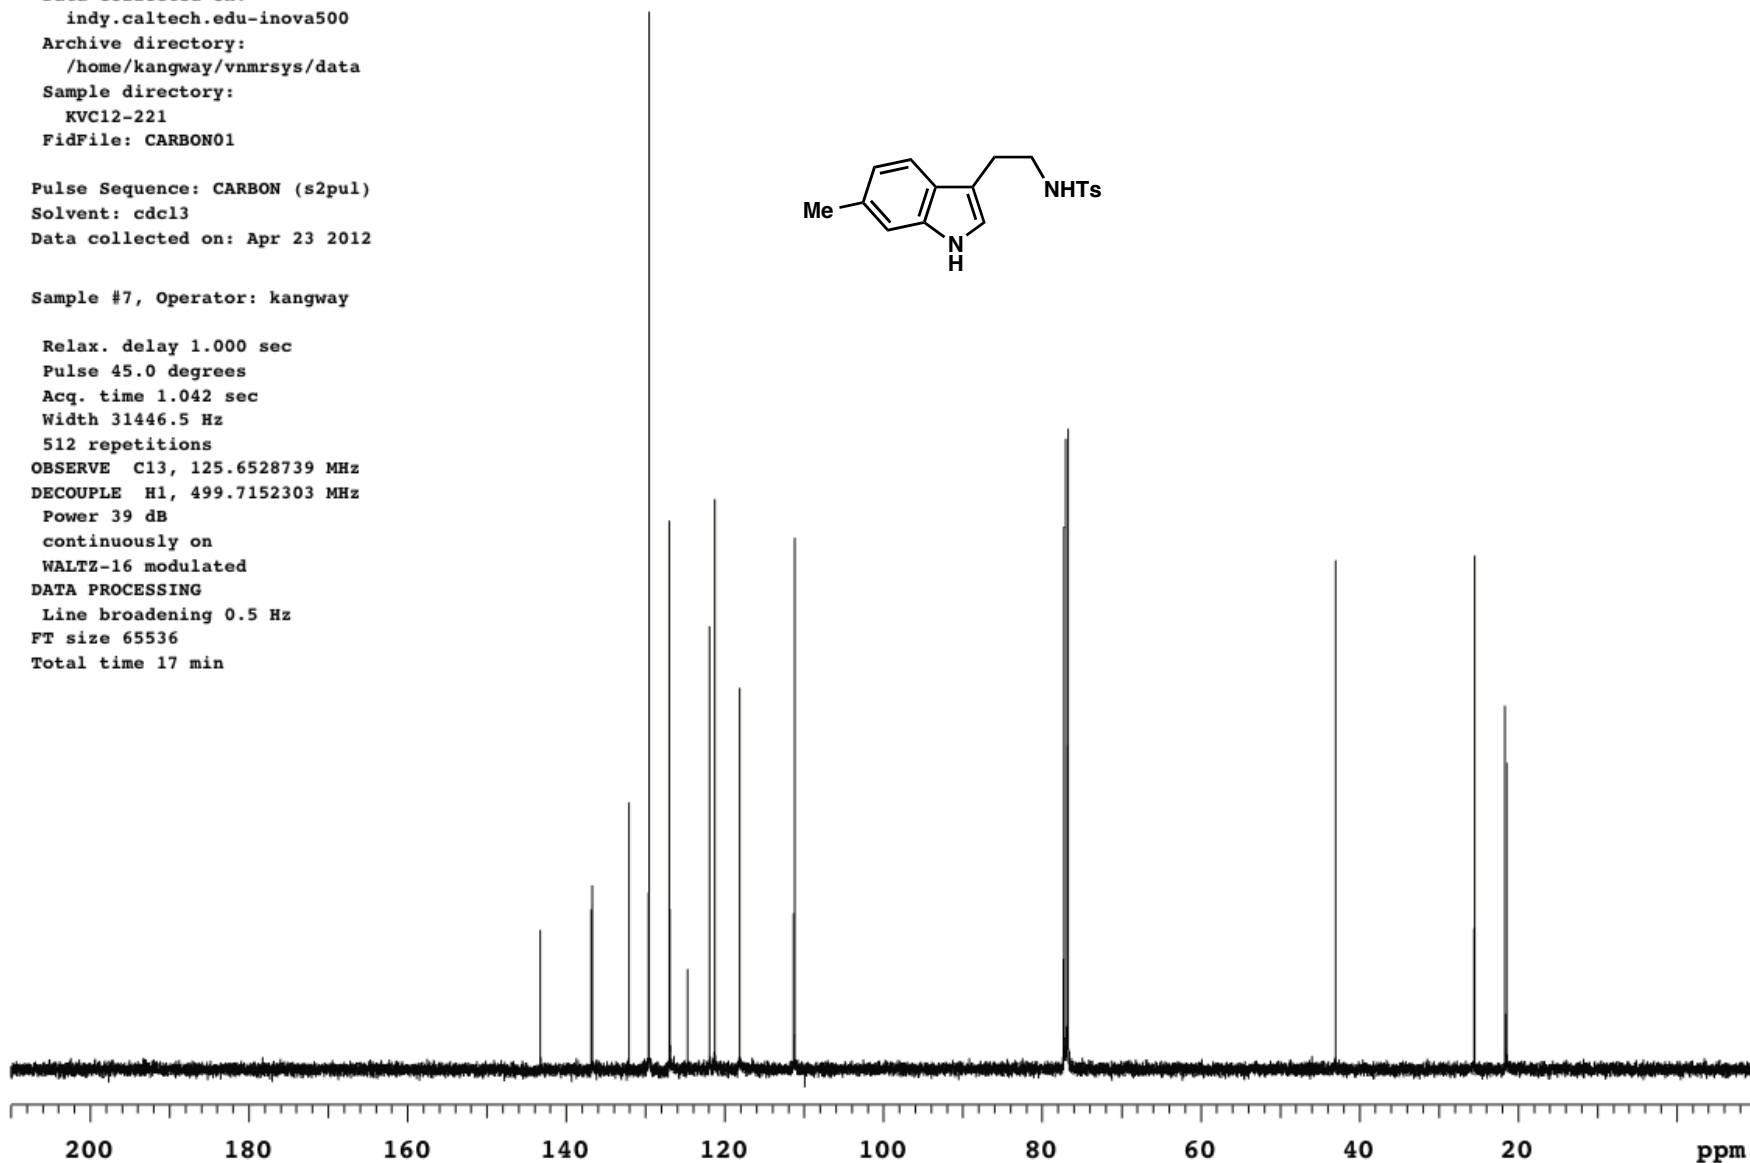

KVC12-223

Sample Name:

KVC12-223

Data Collected on:

indy.caltech.edu-inova500

Archive directory:

/home/kangway/vnmrsys/data

Sample directory:

KVC12-223

FidFile: PROTON01

Pulse Sequence: PROTON (s2pul)

Solvent: cdcl3

Data collected on: Apr 23 2012

Sample #8, Operator: kangway

Relax. delay 5.000 sec

Pulse 45.0 degrees

Acq. time 2.500 sec

Width 8000.0 Hz

32 repetitions

OBSERVE H1, 499.7127410 MHz

DATA PROCESSING

Line broadening 0.2 Hz

FT size 65536

Total time 4 min 0 sec

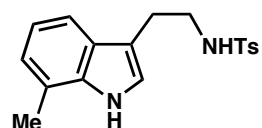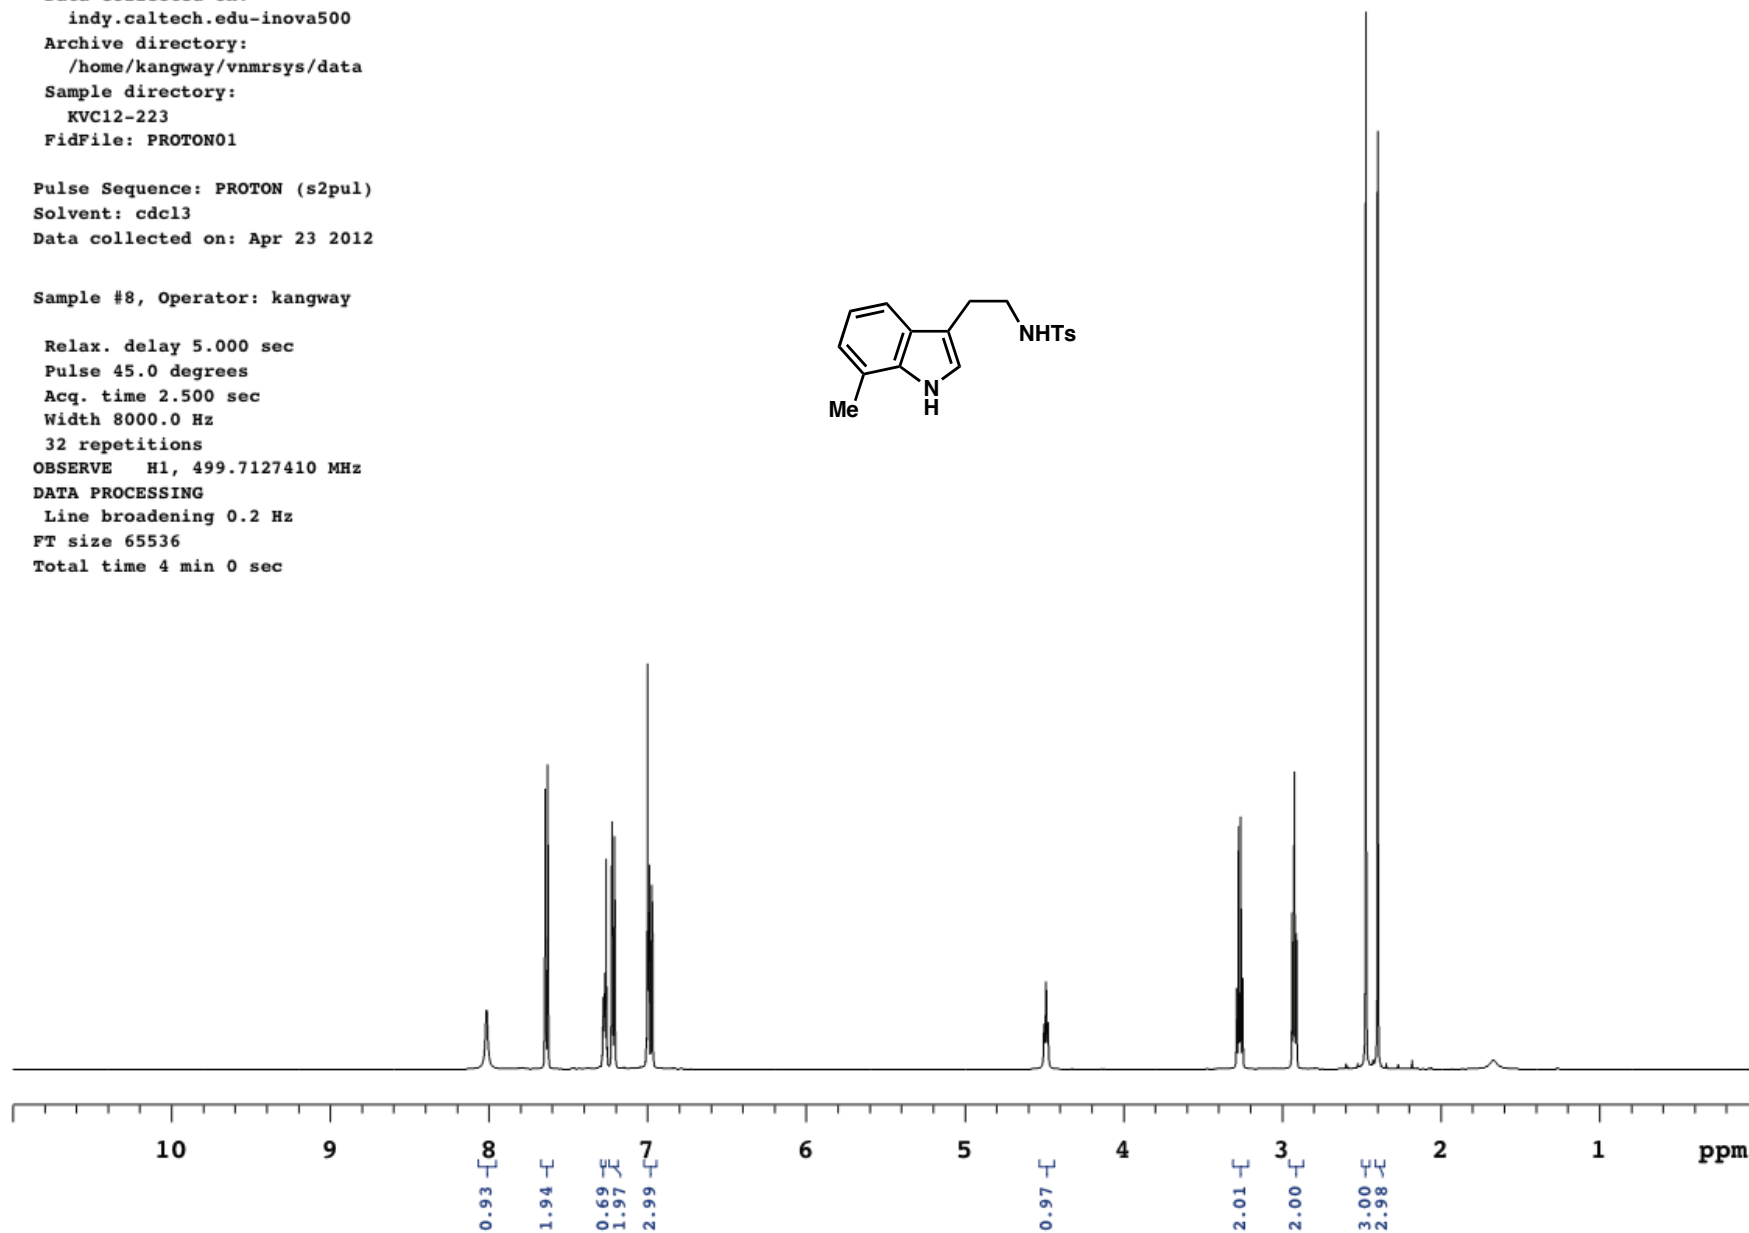

KVC12-223

Sample Name:

KVC12-223

Data Collected on:

indy.caltech.edu-inova500

Archive directory:

/home/kangway/vnmrsys/data

Sample directory:

KVC12-223

FidFile: CARBON01

Pulse Sequence: CARBON (s2pul)

Solvent: cdcl3

Data collected on: Apr 23 2012

Sample #8, Operator: kangway

Relax. delay 1.000 sec

Pulse 45.0 degrees

Acq. time 1.042 sec

Width 31446.5 Hz

512 repetitions

OBSERVE C13, 125.6528748 MHz

DECOUPLE H1, 499.7152303 MHz

Power 39 dB

continuously on

WALTZ-16 modulated

DATA PROCESSING

Line broadening 0.5 Hz

FT size 65536

Total time 17 min

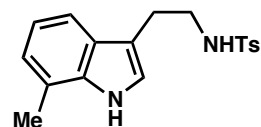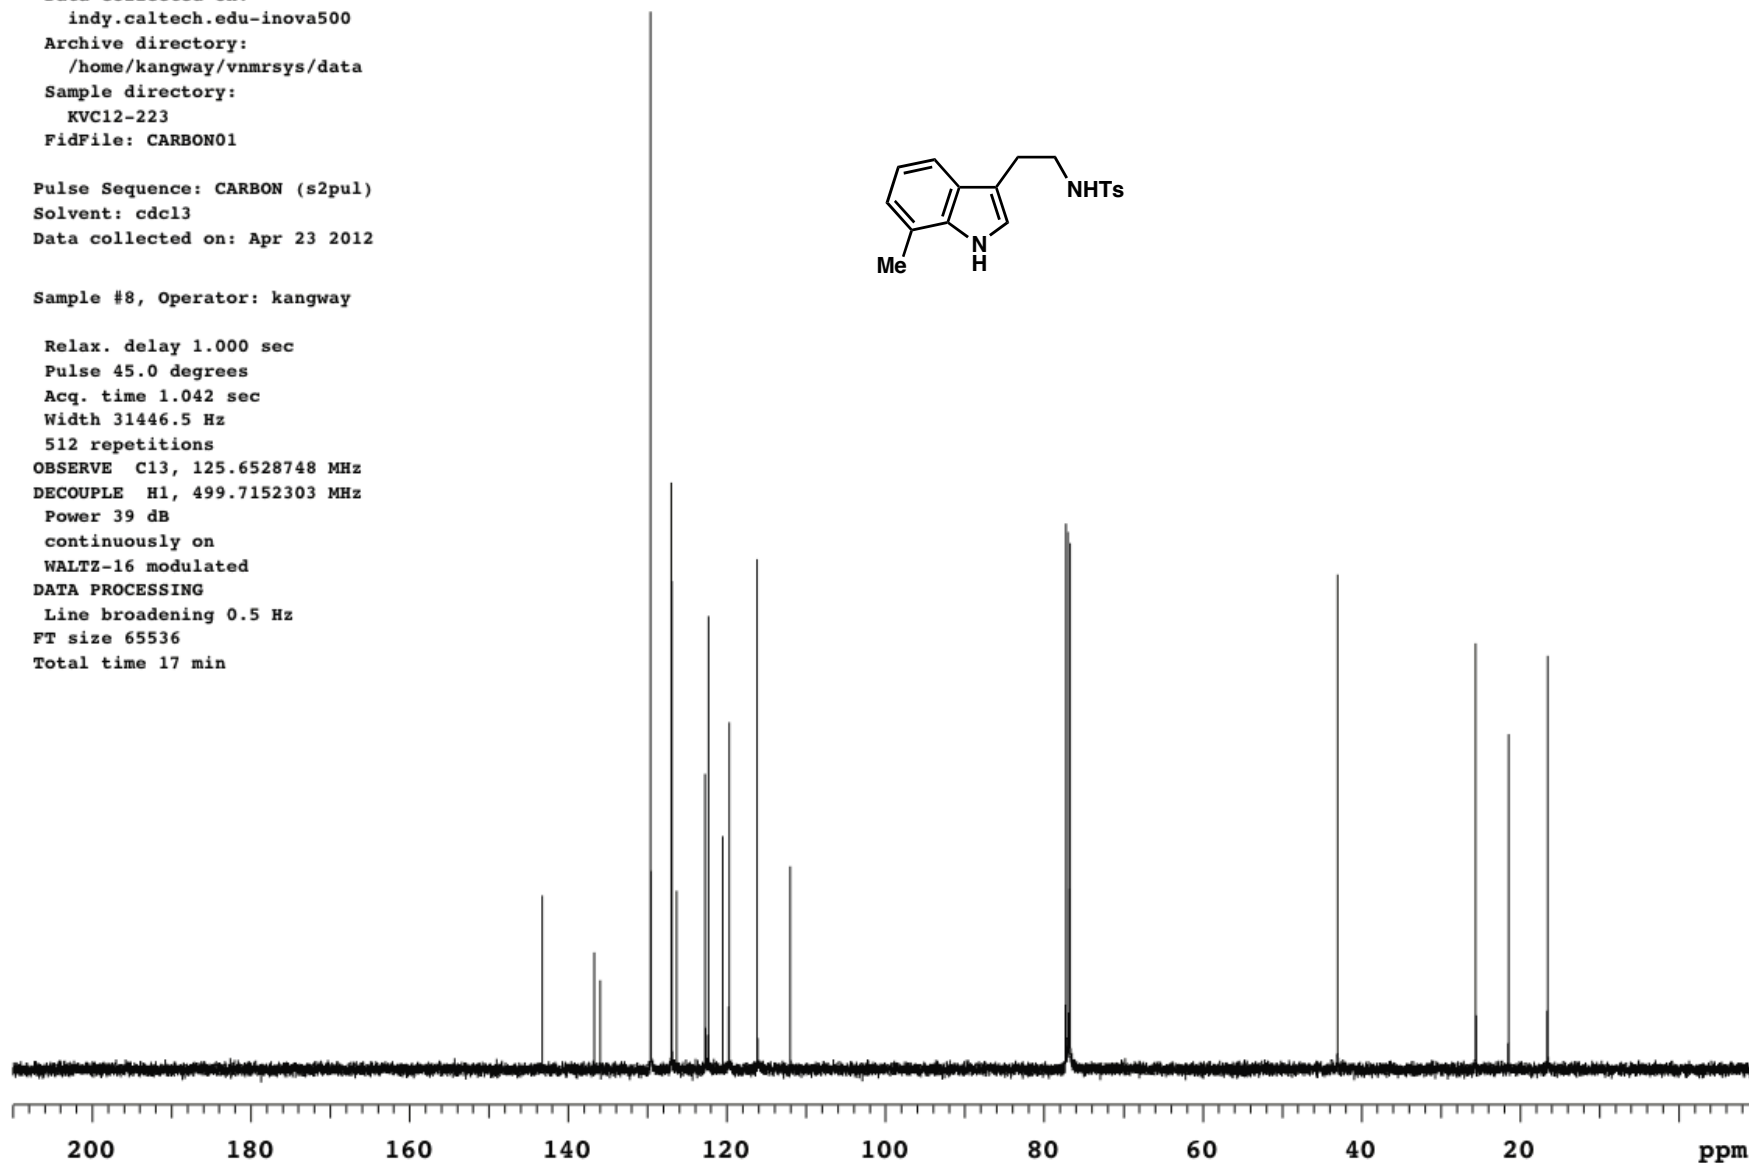

KVC12-275

Sample Name:

KVC12-275

Data Collected on:

indy.caltech.edu-inova500

Archive directory:

/home/kangway/vnmrsys/data

Sample directory:

KVC12-275

FidFile: PROTON01

Pulse Sequence: PROTON (s2pul)

Solvent: cdcl3

Data collected on: Apr 23 2012

Sample #10, Operator: kangway

Relax. delay 5.000 sec

Pulse 45.0 degrees

Acq. time 2.500 sec

Width 8000.0 Hz

32 repetitions

OBSERVE H1, 499.7127408 MHz

DATA PROCESSING

Line broadening 0.2 Hz

FT size 65536

Total time 4 min 0 sec

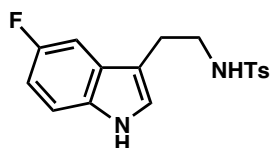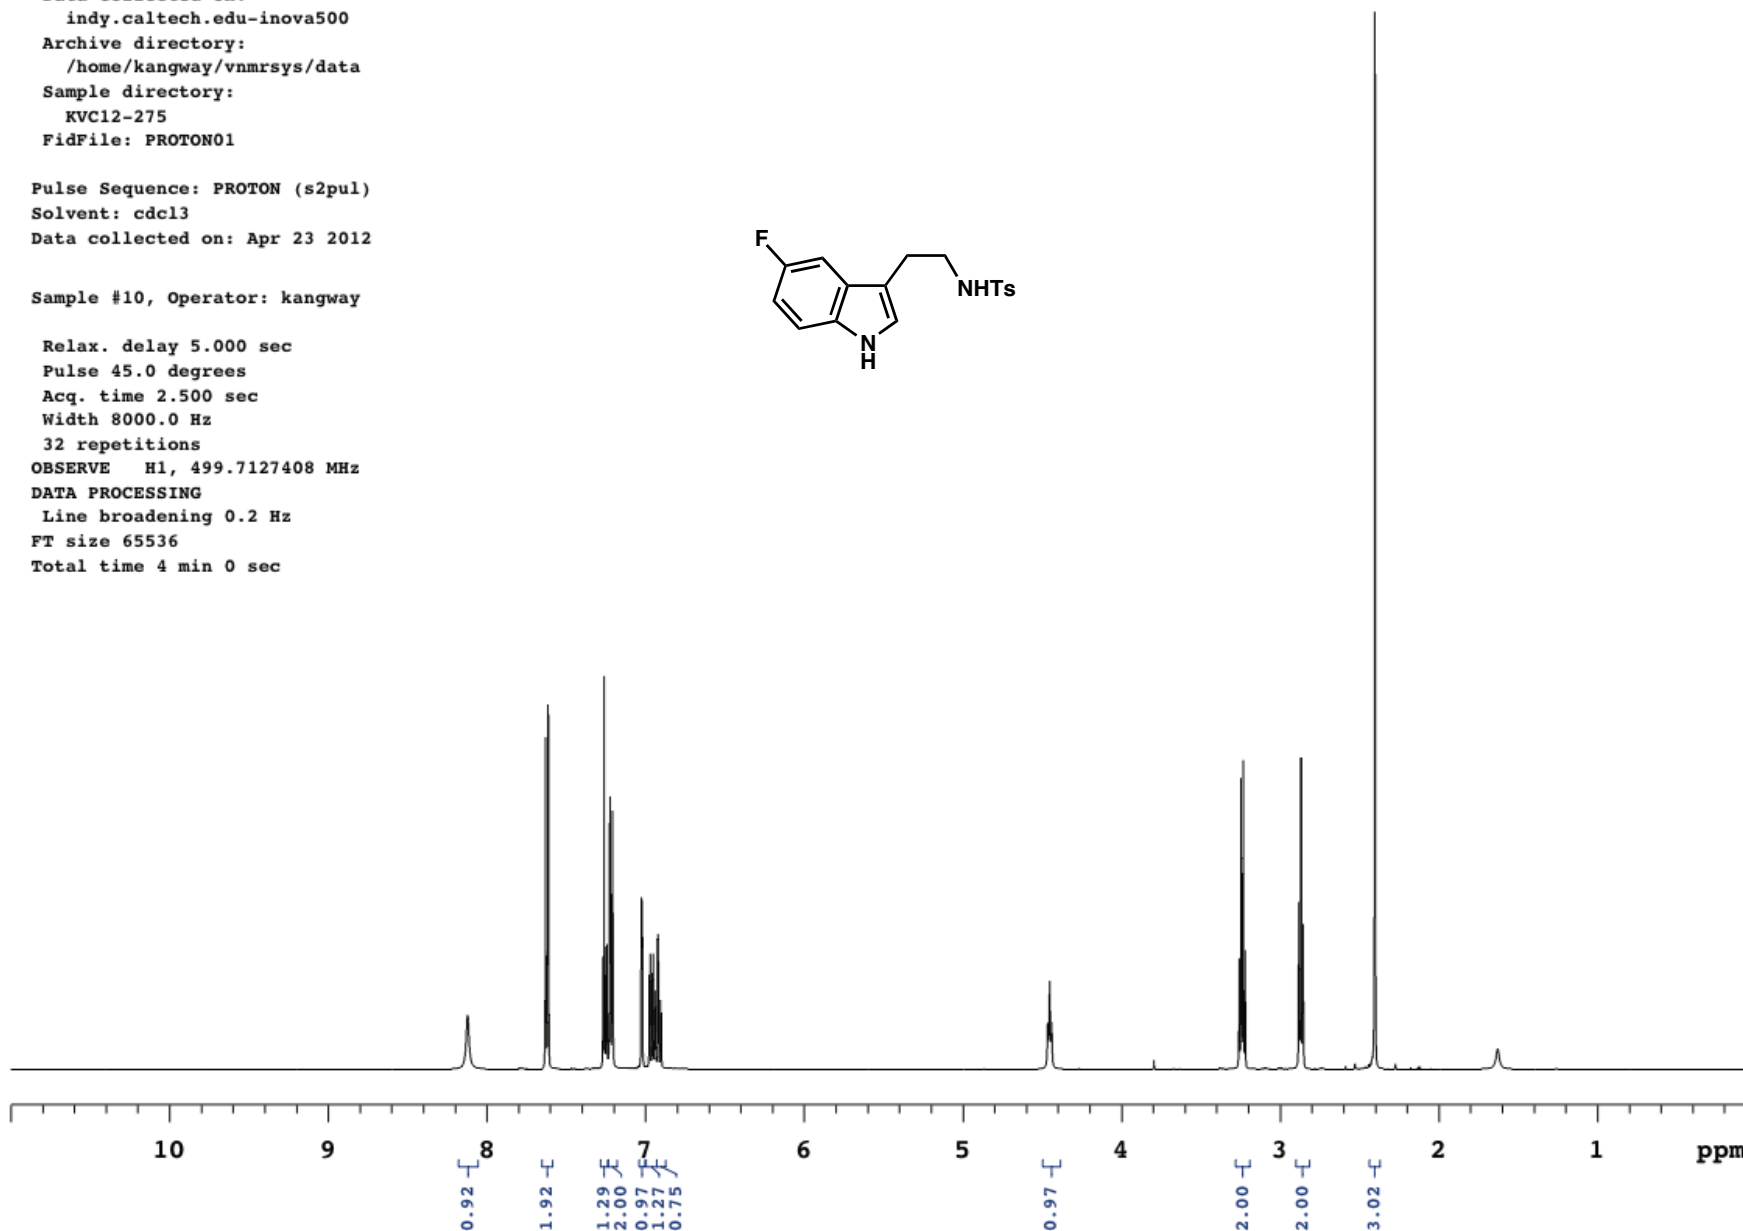



KVC12-275

Sample Name:

KVC12-275

Data Collected on:

indy.caltech.edu-inova500

Archive directory:

/home/kangway/vnmrsys/data

Sample directory:

KVC12-275

FidFile: CARBON01

Pulse Sequence: CARBON (s2pul)

Solvent: cdcl3

Data collected on: Apr 23 2012

Sample #10, Operator: kangway

Relax. delay 1.000 sec

Pulse 45.0 degrees

Acq. time 1.042 sec

Width 31446.5 Hz

512 repetitions

OBSERVE C13, 125.6528729 MHz

DECOUPLE H1, 499.7152303 MHz

Power 39 dB

continuously on

WALTZ-16 modulated

DATA PROCESSING

Line broadening 0.5 Hz

FT size 65536

Total time 17 min

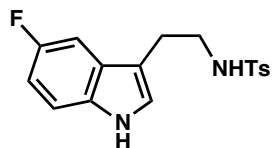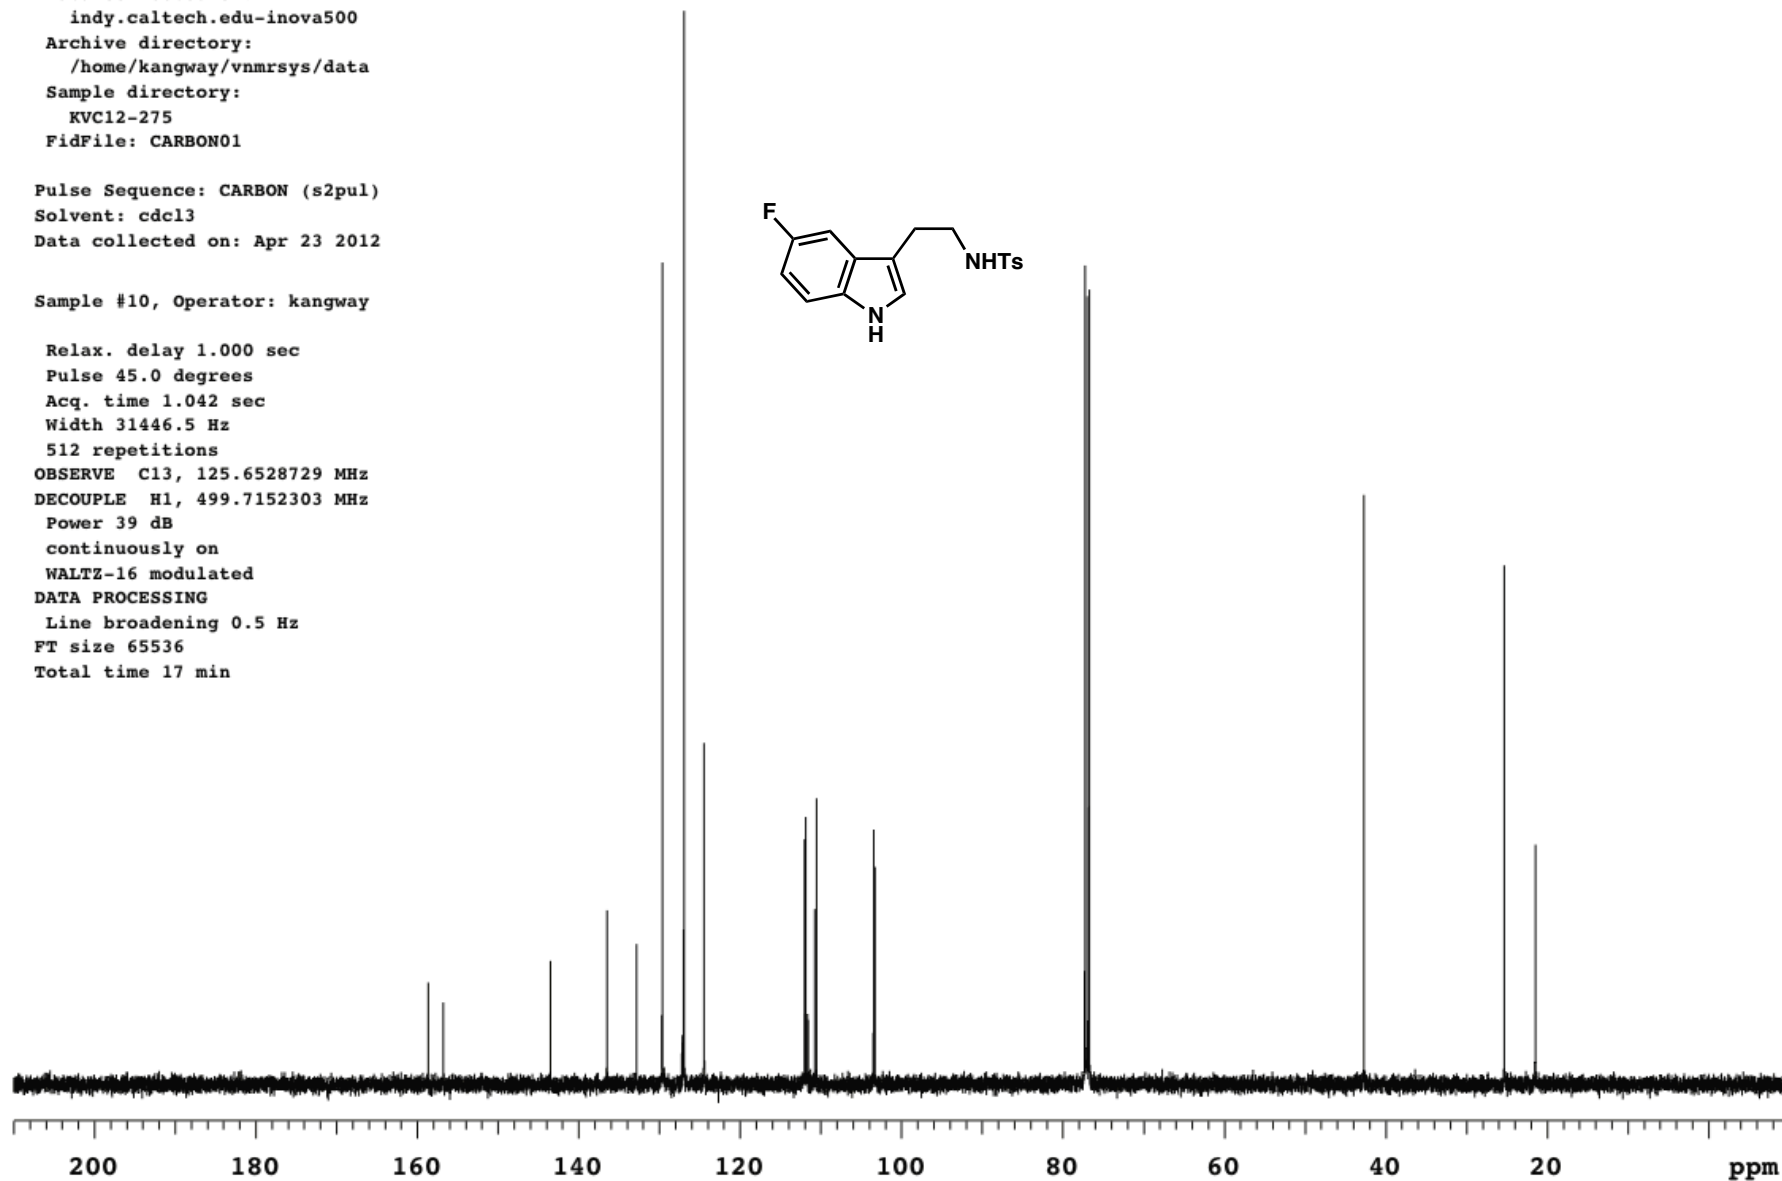

KVC12-273

Sample Name:  
KVC12-273  
Data Collected on:  
indy.caltech.edu-inova500  
Archive directory:  
/home/kangway/vnmrsys/data  
Sample directory:  
KVC12-273  
FidFile: PROTON01

Pulse Sequence: PROTON (s2pul)  
Solvent: cdcl3  
Data collected on: Apr 23 2012

Sample #13, Operator: kangway

Relax. delay 5.000 sec  
Pulse 45.0 degrees  
Acq. time 2.500 sec  
Width 8000.0 Hz  
32 repetitions  
OBSERVE H1, 499.7127408 MHz  
DATA PROCESSING  
Line broadening 0.2 Hz  
FT size 65536  
Total time 4 min 0 sec

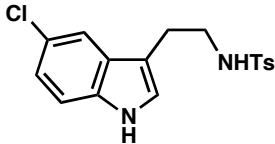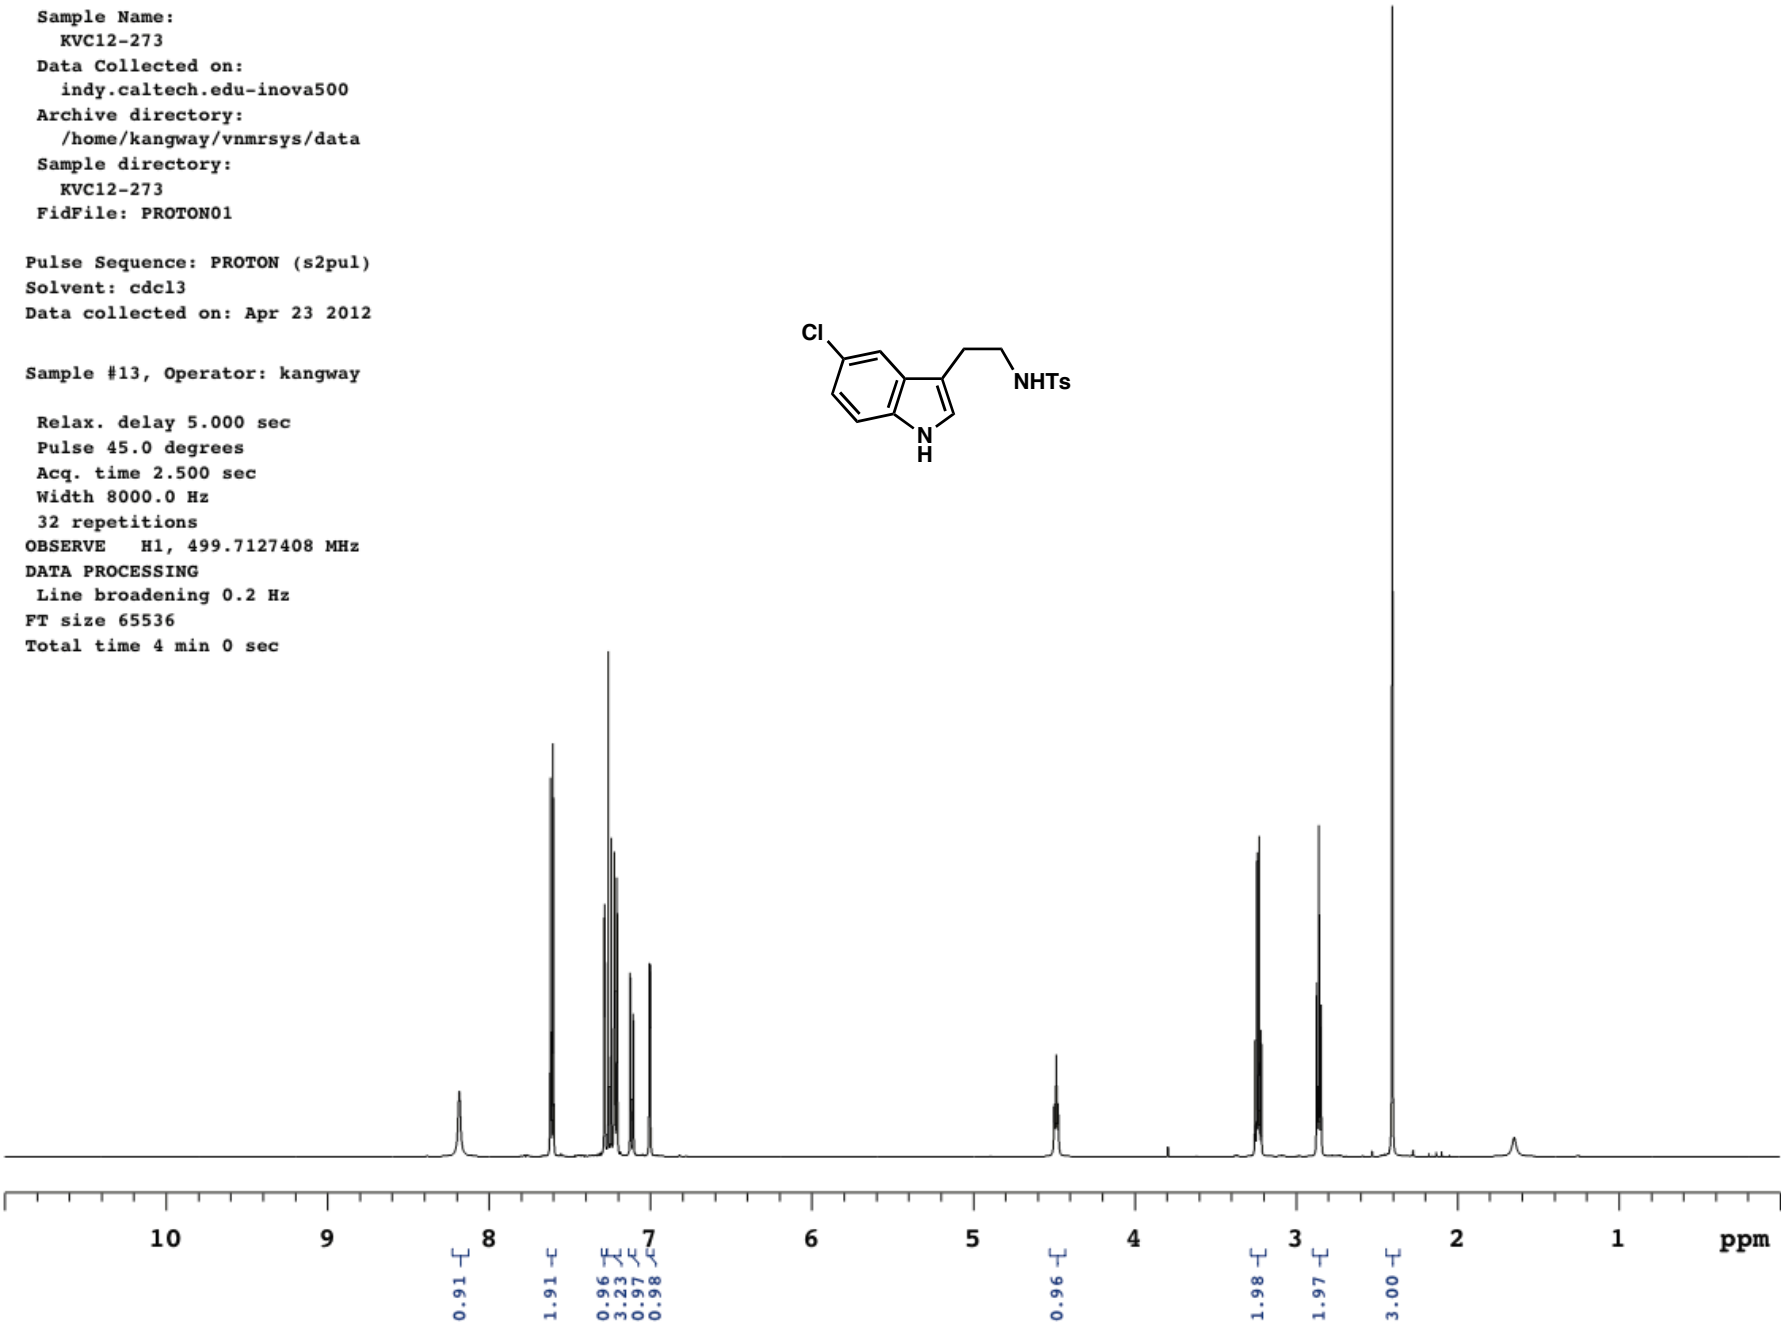

KVC12-273

Sample Name:  
KVC12-273  
Data Collected on:  
indy.caltech.edu-inova500  
Archive directory:  
/home/kangway/vnmrsys/data  
Sample directory:  
KVC12-273  
FidFile: CARBON01

Pulse Sequence: CARBON (s2pul)  
Solvent: cdcl3  
Data collected on: Apr 23 2012

Sample #13, Operator: kangway

Relax. delay 1.000 sec  
Pulse 45.0 degrees  
Acq. time 1.042 sec  
Width 31446.5 Hz  
512 repetitions  
OBSERVE C13, 125.6528729 MHz  
DECOUPLE H1, 499.7152303 MHz  
Power 39 dB  
continuously on  
WALTZ-16 modulated  
DATA PROCESSING  
Line broadening 0.5 Hz  
FT size 65536  
Total time 17 min

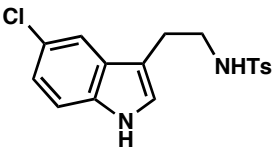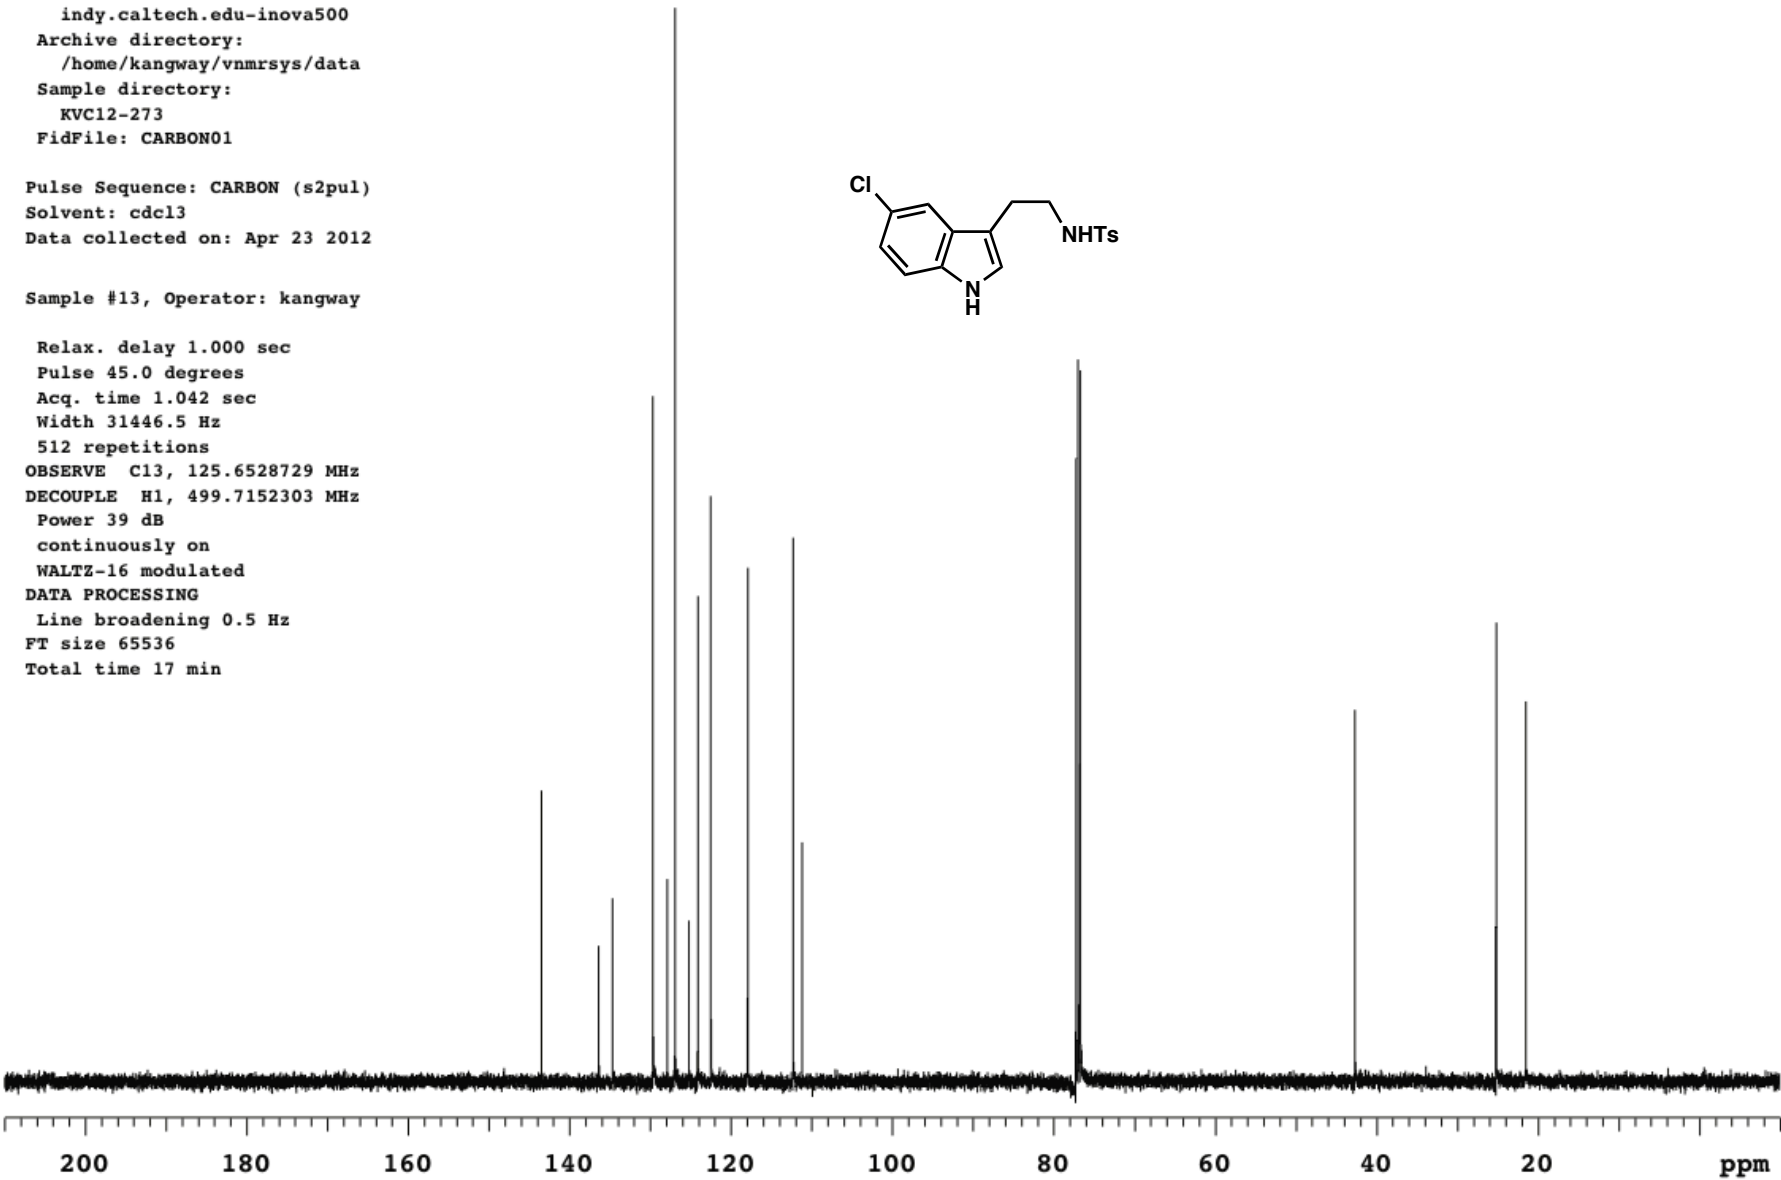

KVC12-133

Sample Name:

KVC12-133

Data Collected on:

indy.caltech.edu-inova500

Archive directory:

/home/kangway/vnmrsys/data

Sample directory:

KVC12-133

FidFile: PROTON01

Pulse Sequence: PROTON (s2pul)

Solvent: cdcl3

Data collected on: Apr 20 2012

Sample #21, Operator: kangway

Relax. delay 5.000 sec

Pulse 45.0 degrees

Acq. time 2.500 sec

Width 8000.0 Hz

32 repetitions

OBSERVE H1, 499.7127408 MHz

DATA PROCESSING

Line broadening 0.2 Hz

FT size 65536

Total time 4 min 0 sec

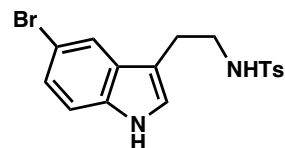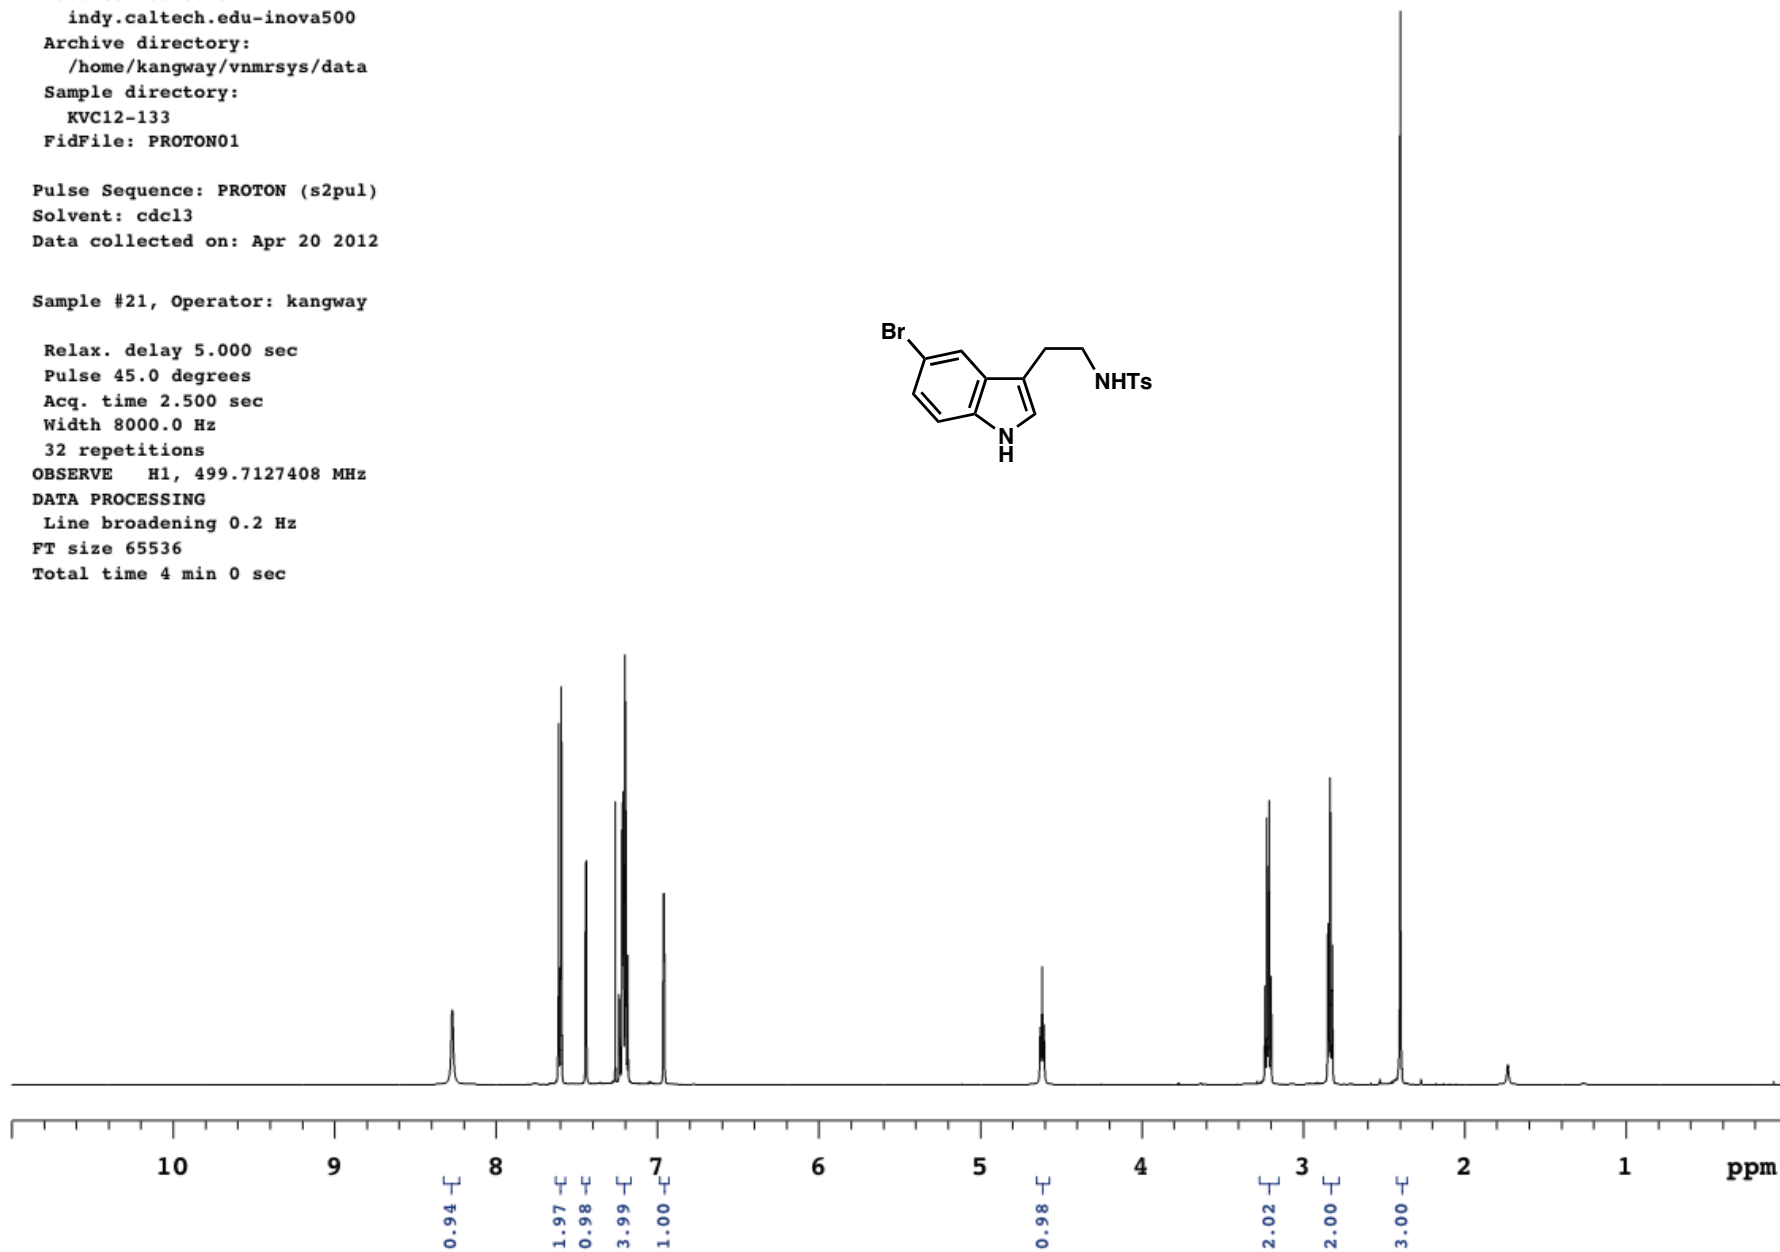

KVC12-133

Sample Name:  
KVC12-133  
Data Collected on:  
indy.caltech.edu-inova500  
Archive directory:  
/home/kangway/vnmrsys/data  
Sample directory:  
KVC12-133  
FidFile: CARBON01

Pulse Sequence: CARBON (s2pul)  
Solvent: cdcl3  
Data collected on: Apr 20 2012

Sample #21, Operator: kangway

Relax. delay 1.000 sec  
Pulse 45.0 degrees  
Acq. time 1.042 sec  
Width 31446.5 Hz  
512 repetitions  
OBSERVE C13, 125.6528767 MHz  
DECOUPLE H1, 499.7152303 MHz  
Power 39 dB  
continuously on  
WALTZ-16 modulated  
DATA PROCESSING  
Line broadening 0.5 Hz  
FT size 65536  
Total time 17 min

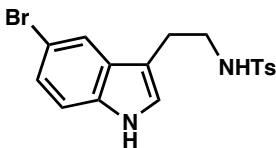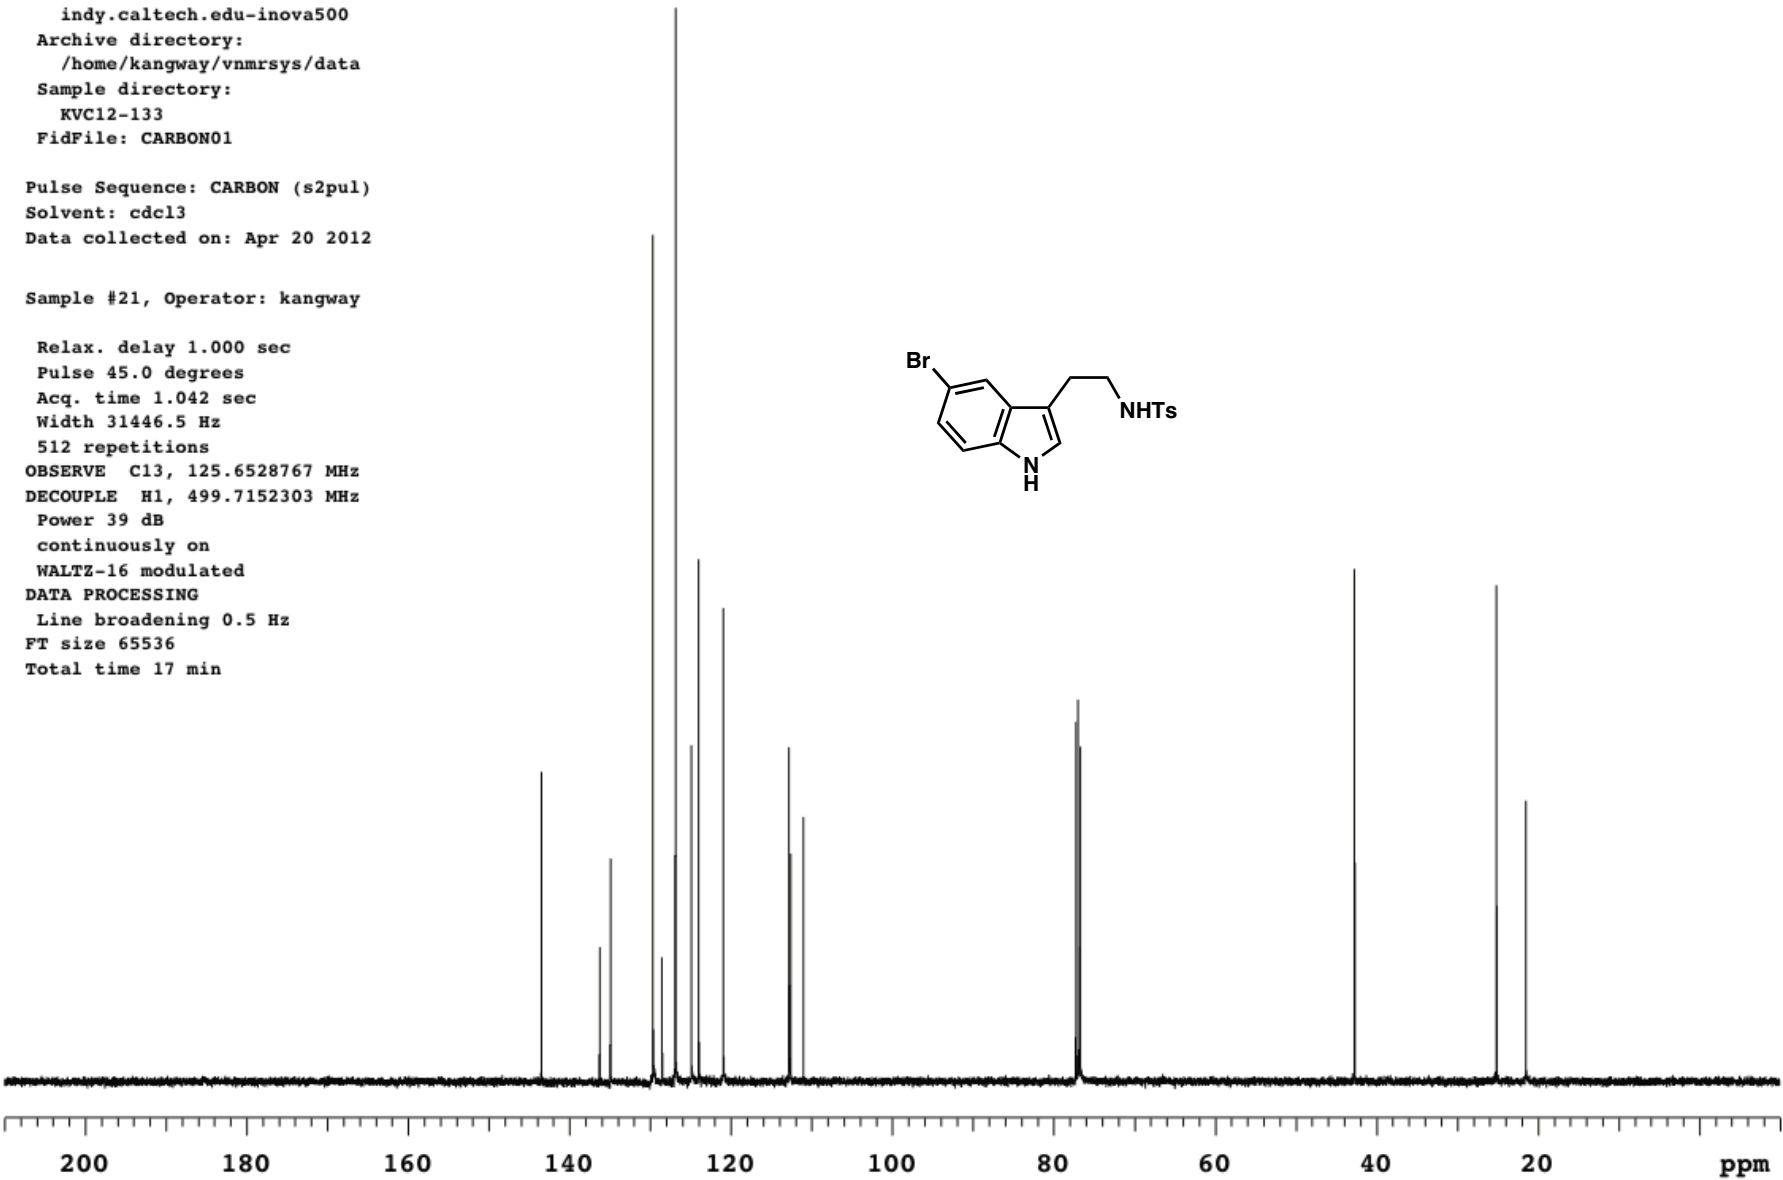

KVC12-139

Sample Name:

KVC12-139

Data Collected on:

indy.caltech.edu-inova500

Archive directory:

/home/kangway/vnmrsys/data

Sample directory:

KVC12-139

FidFile: PROTON01

Pulse Sequence: PROTON (s2pul)

Solvent: cdcl3

Data collected on: Apr 20 2012

Sample #47, Operator: kangway

Relax. delay 5.000 sec

Pulse 45.0 degrees

Acq. time 2.500 sec

Width 8000.0 Hz

32 repetitions

OBSERVE H1, 499.7127410 MHz

DATA PROCESSING

Line broadening 0.2 Hz

FT size 65536

Total time 4 min 0 sec

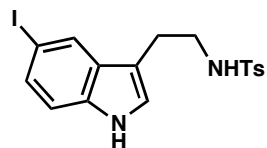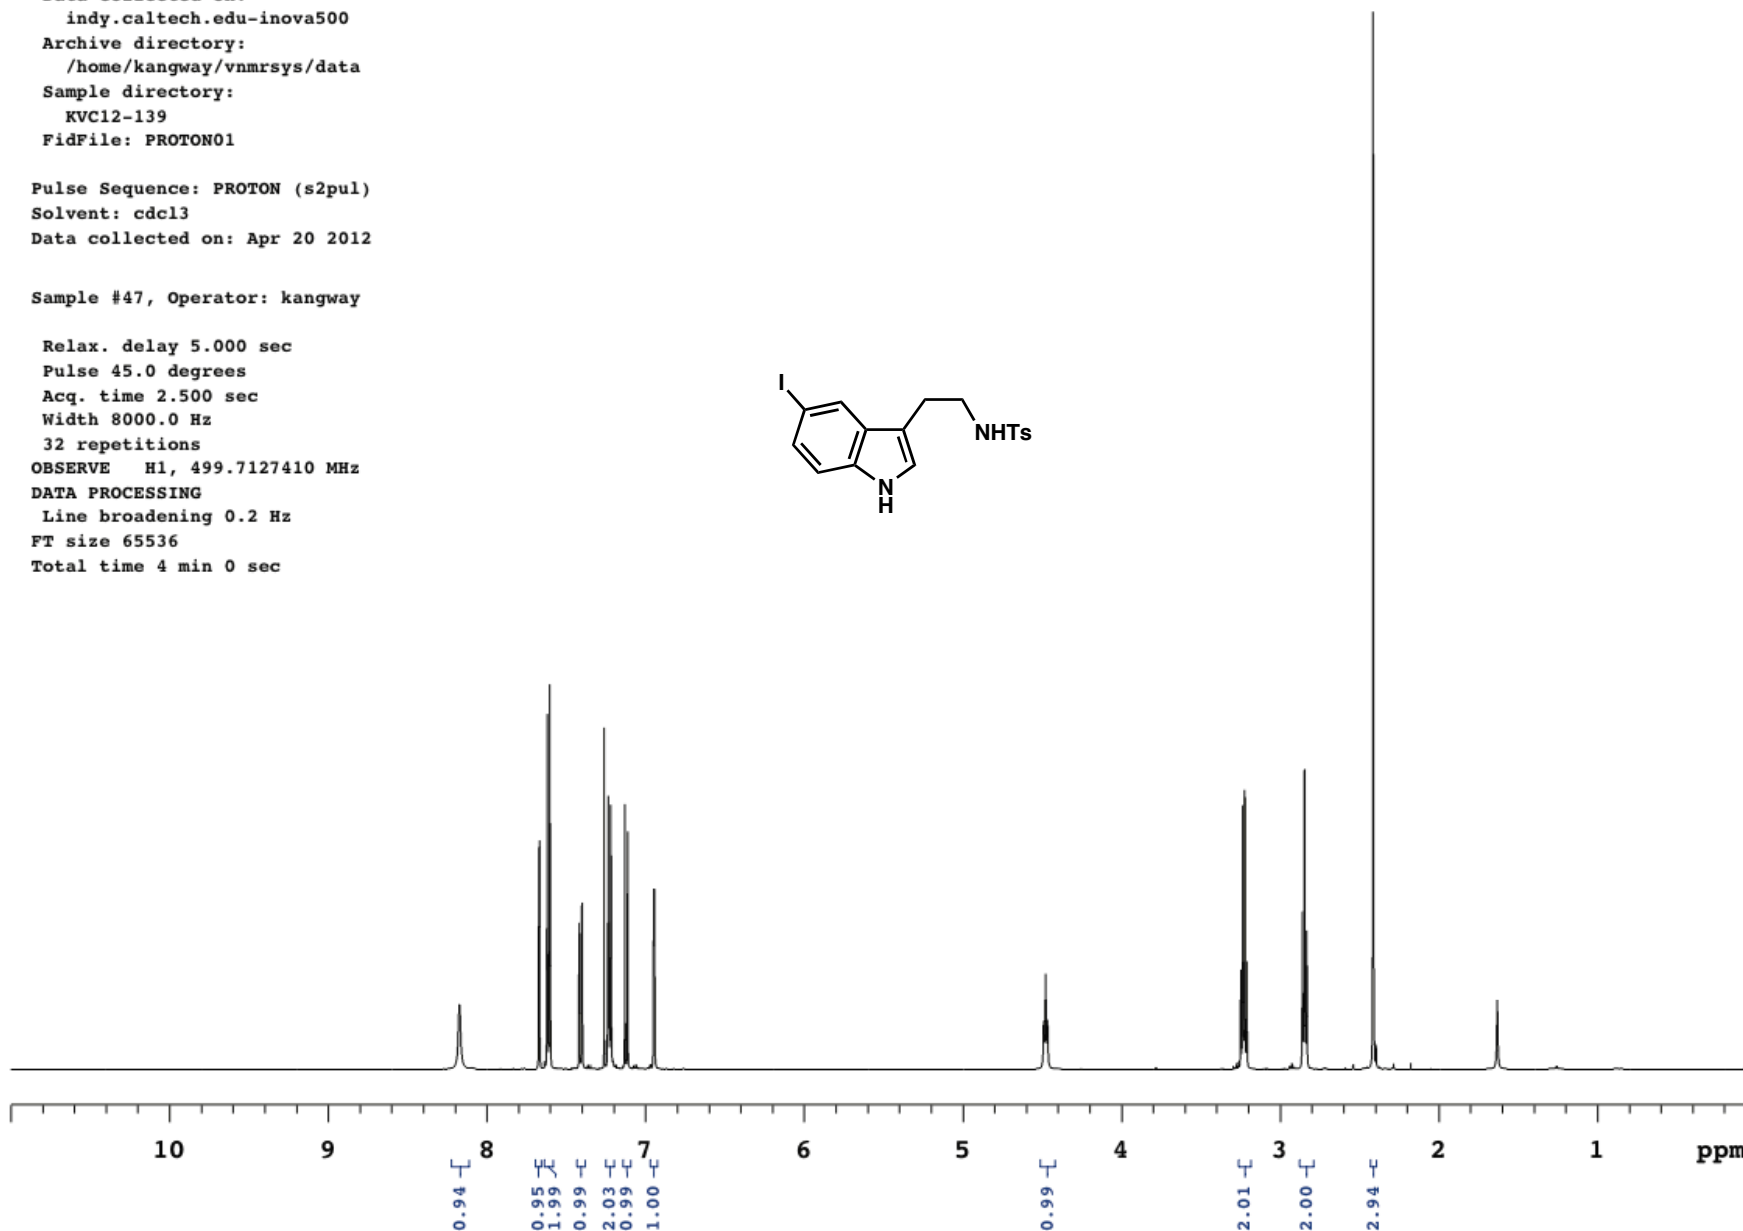

KVC12-139

Sample Name:

KVC12-139

Data Collected on:

indy.caltech.edu-inova500

Archive directory:

/home/kangway/vnmrsys/data

Sample directory:

KVC12-139

FidFile: CARBON01

Pulse Sequence: CARBON (s2pul)

Solvent: cdcl3

Data collected on: Apr 20 2012

Sample #47, Operator: kangway

Relax. delay 1.000 sec

Pulse 45.0 degrees

Acq. time 1.042 sec

Width 31446.5 Hz

512 repetitions

OBSERVE C13, 125.6528729 MHz

DECOUPLE H1, 499.7152303 MHz

Power 39 dB

continuously on

WALTZ-16 modulated

DATA PROCESSING

Line broadening 0.5 Hz

FT size 65536

Total time 17 min

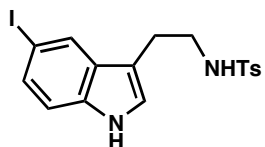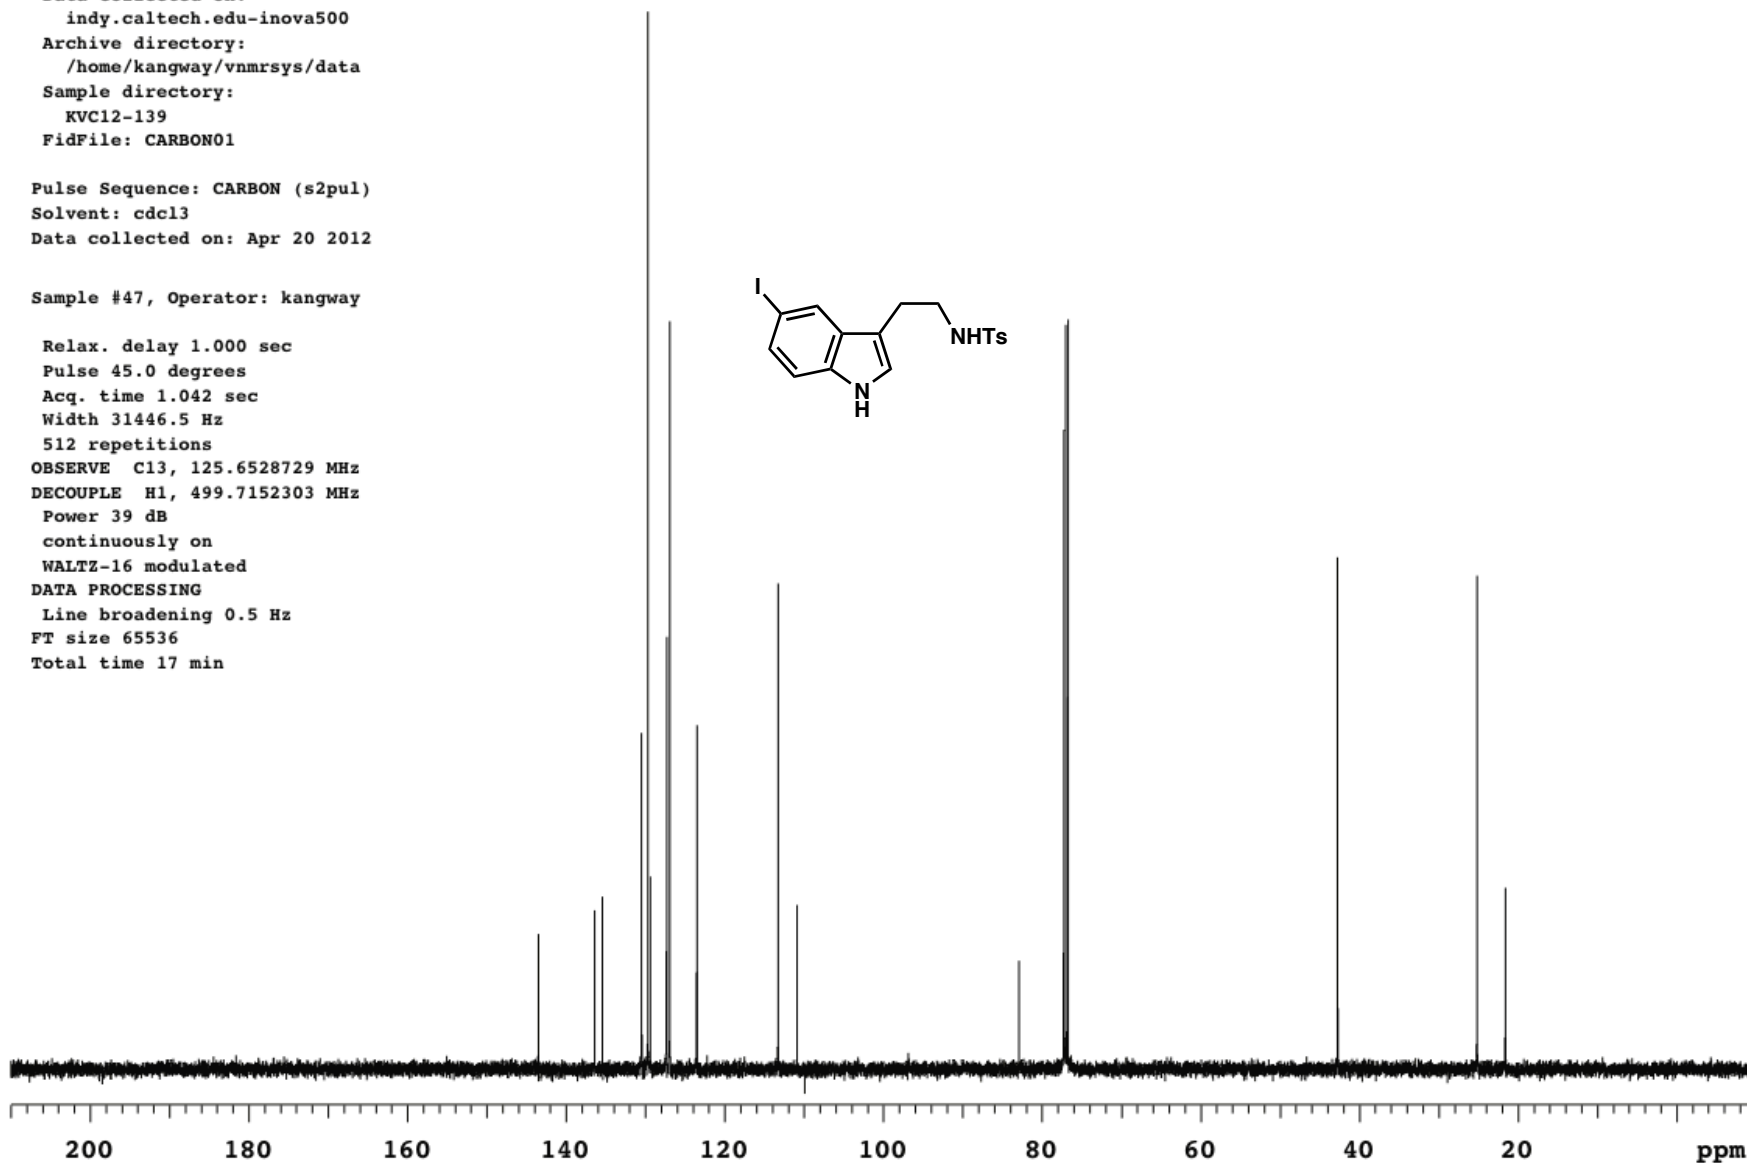

KVC12-155

Sample Name:

KVC12-155

Data Collected on:

indy.caltech.edu-inova500

Archive directory:

/home/kangway/vnmrsys/data

Sample directory:

KVC12-155

FidFile: PROTON01

Pulse Sequence: PROTON (s2pul)

Solvent: cdcl3

Data collected on: Apr 20 2012

Sample #48, Operator: kangway

Relax. delay 5.000 sec

Pulse 45.0 degrees

Acq. time 2.500 sec

Width 8000.0 Hz

32 repetitions

OBSERVE H1, 499.7127408 MHz

DATA PROCESSING

Line broadening 0.2 Hz

FT size 65536

Total time 4 min 0 sec

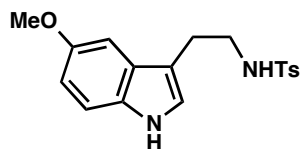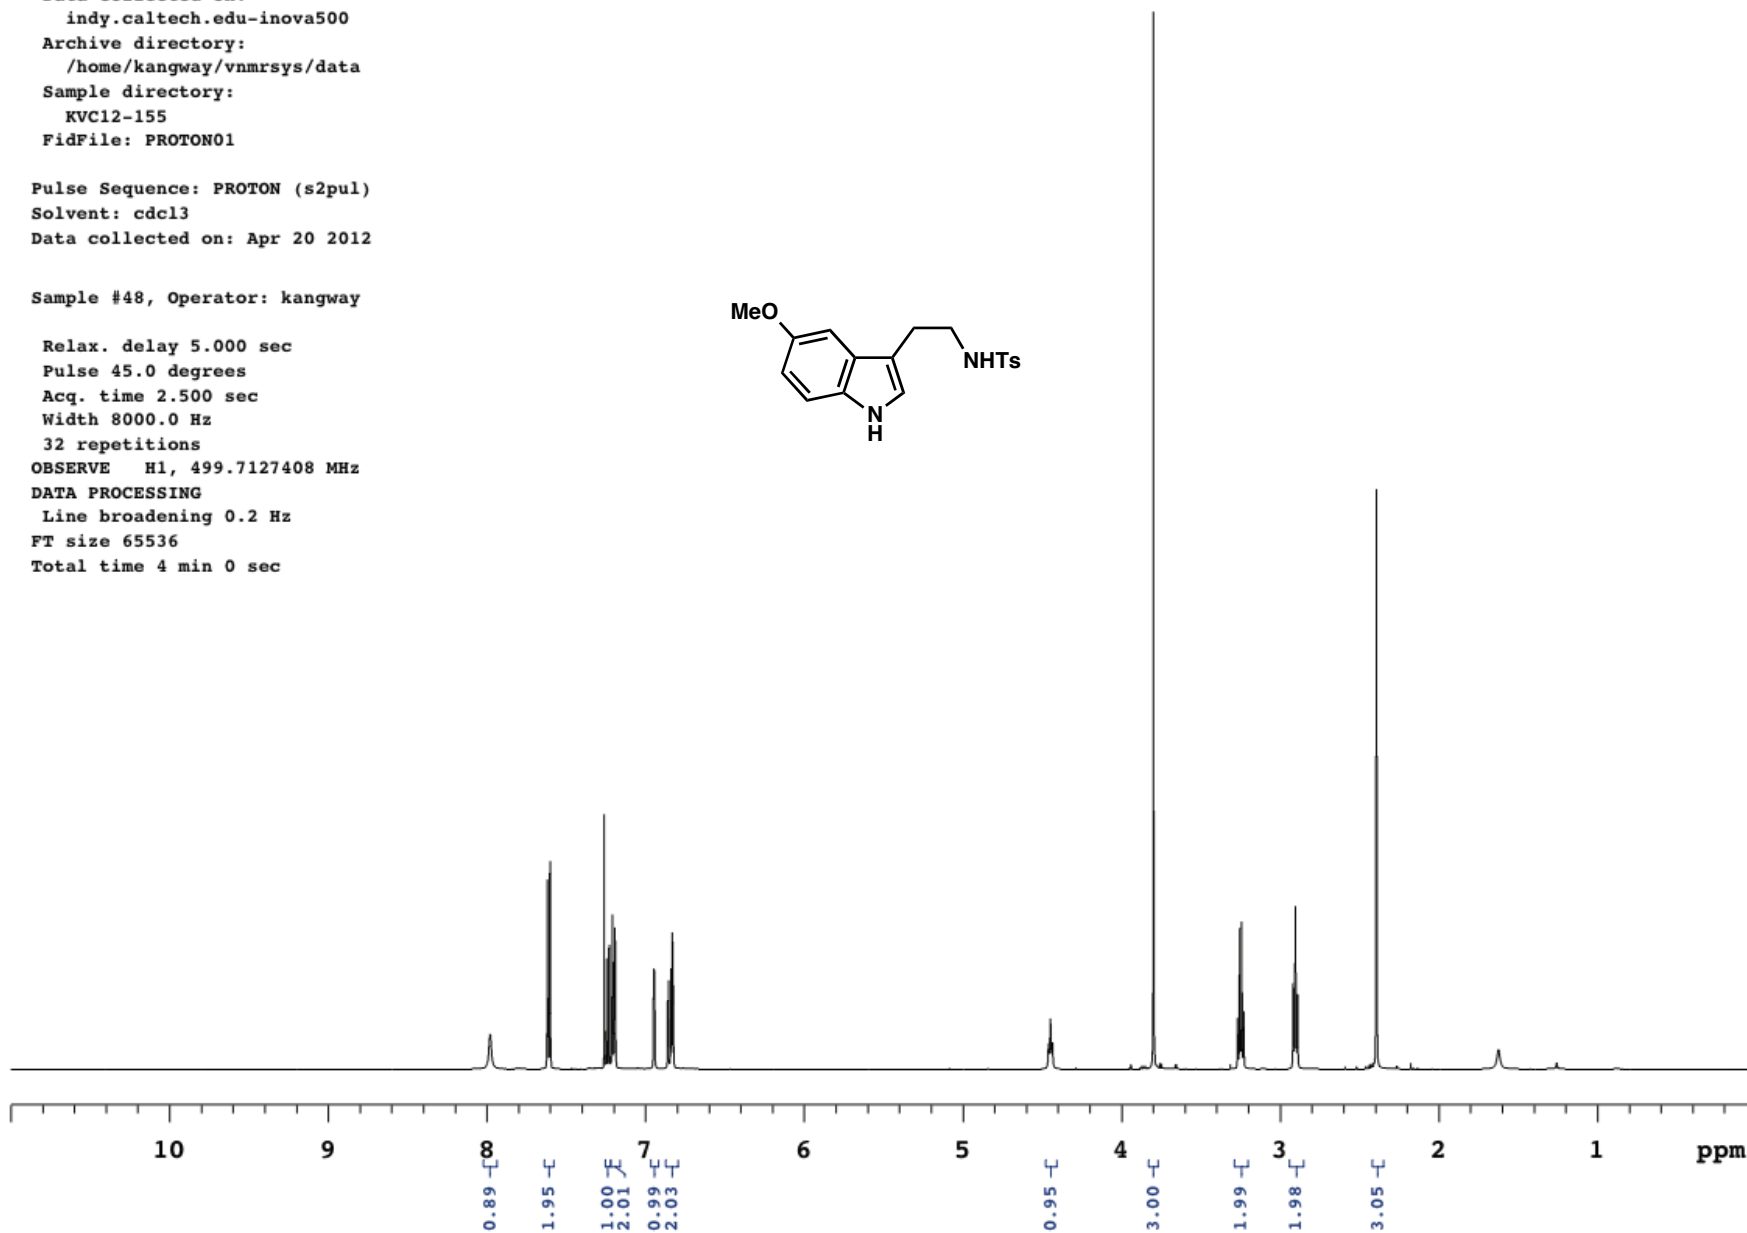



KVC12-155

Sample Name:

KVC12-155

Data Collected on:

indy.caltech.edu-inova500

Archive directory:

/home/kangway/vnmrsys/data

Sample directory:

KVC12-155

FidFile: CARBON01

Pulse Sequence: CARBON (s2pul)

Solvent: cdcl3

Data collected on: Apr 20 2012

Sample #48, Operator: kangway

Relax. delay 1.000 sec

Pulse 45.0 degrees

Acq. time 1.042 sec

Width 31446.5 Hz

512 repetitions

OBSERVE C13, 125.6528729 MHz

DECOUPLE H1, 499.7152303 MHz

Power 39 dB

continuously on

WALTZ-16 modulated

DATA PROCESSING

Line broadening 0.5 Hz

FT size 65536

Total time 17 min

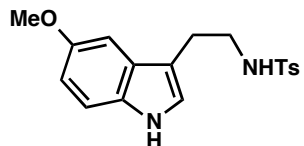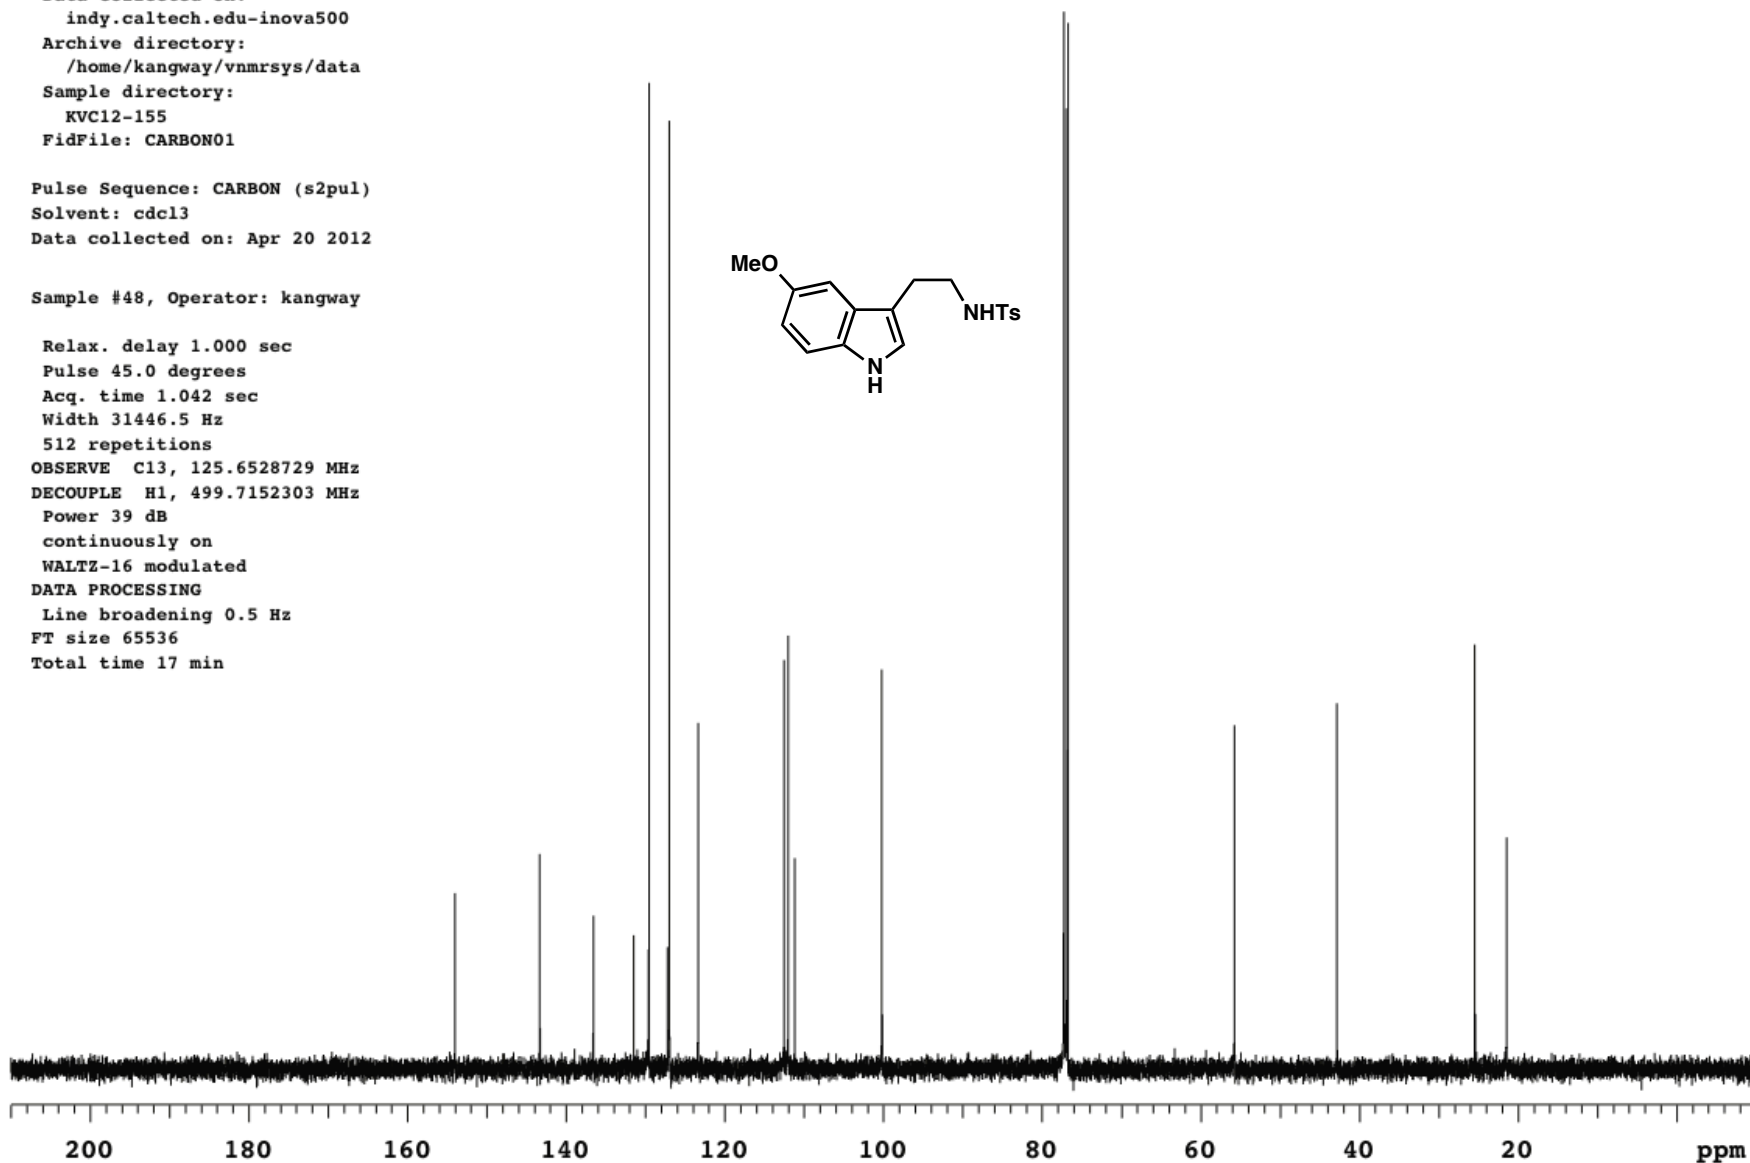

KVC12-217

Sample Name:

KVC12-217

Data Collected on:

indy.caltech.edu-inova500

Archive directory:

/home/kangway/vnmrsys/data

Sample directory:

KVC12-217

FidFile: PROTON01

Pulse Sequence: PROTON (s2pul)

Solvent: cdcl3

Data collected on: Apr 23 2012

Sample #11, Operator: kangway

Relax. delay 5.000 sec

Pulse 45.0 degrees

Acq. time 2.500 sec

Width 8000.0 Hz

32 repetitions

OBSERVE H1, 499.7127410 MHz

DATA PROCESSING

Line broadening 0.2 Hz

FT size 65536

Total time 4 min 0 sec

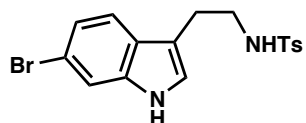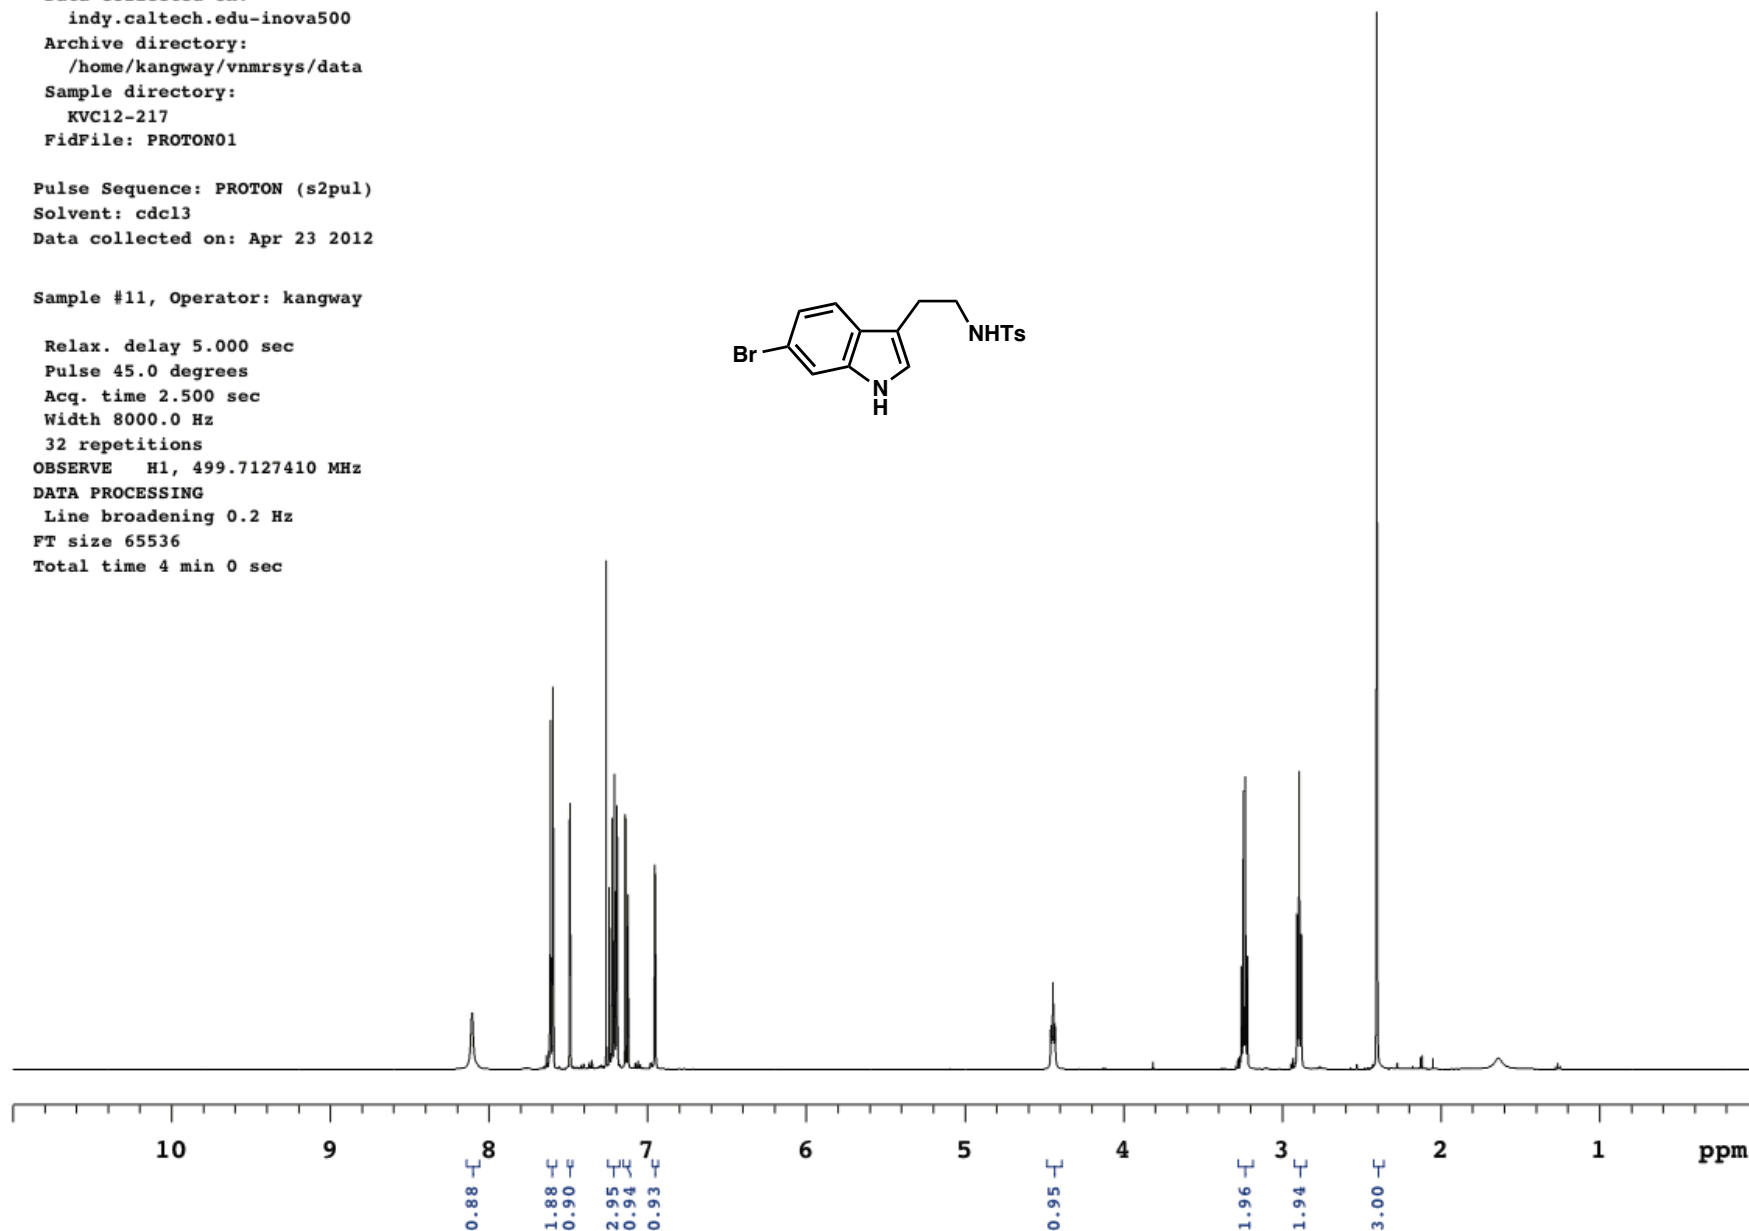

KVC12-217

Sample Name:

KVC12-217

Data Collected on:

indy.caltech.edu-inova500

Archive directory:

/home/kangway/vnmrsys/data

Sample directory:

KVC12-217

FidFile: CARBON01

Pulse Sequence: CARBON (s2pul)

Solvent: cdcl3

Data collected on: Apr 23 2012

Sample #11, Operator: kangway

Relax. delay 1.000 sec

Pulse 45.0 degrees

Acq. time 1.042 sec

Width 31446.5 Hz

512 repetitions

OBSERVE C13, 125.6528719 MHz

DECOUPLE H1, 499.7152303 MHz

Power 39 dB

continuously on

WALTZ-16 modulated

DATA PROCESSING

Line broadening 0.5 Hz

FT size 65536

Total time 17 min

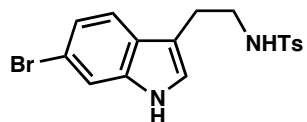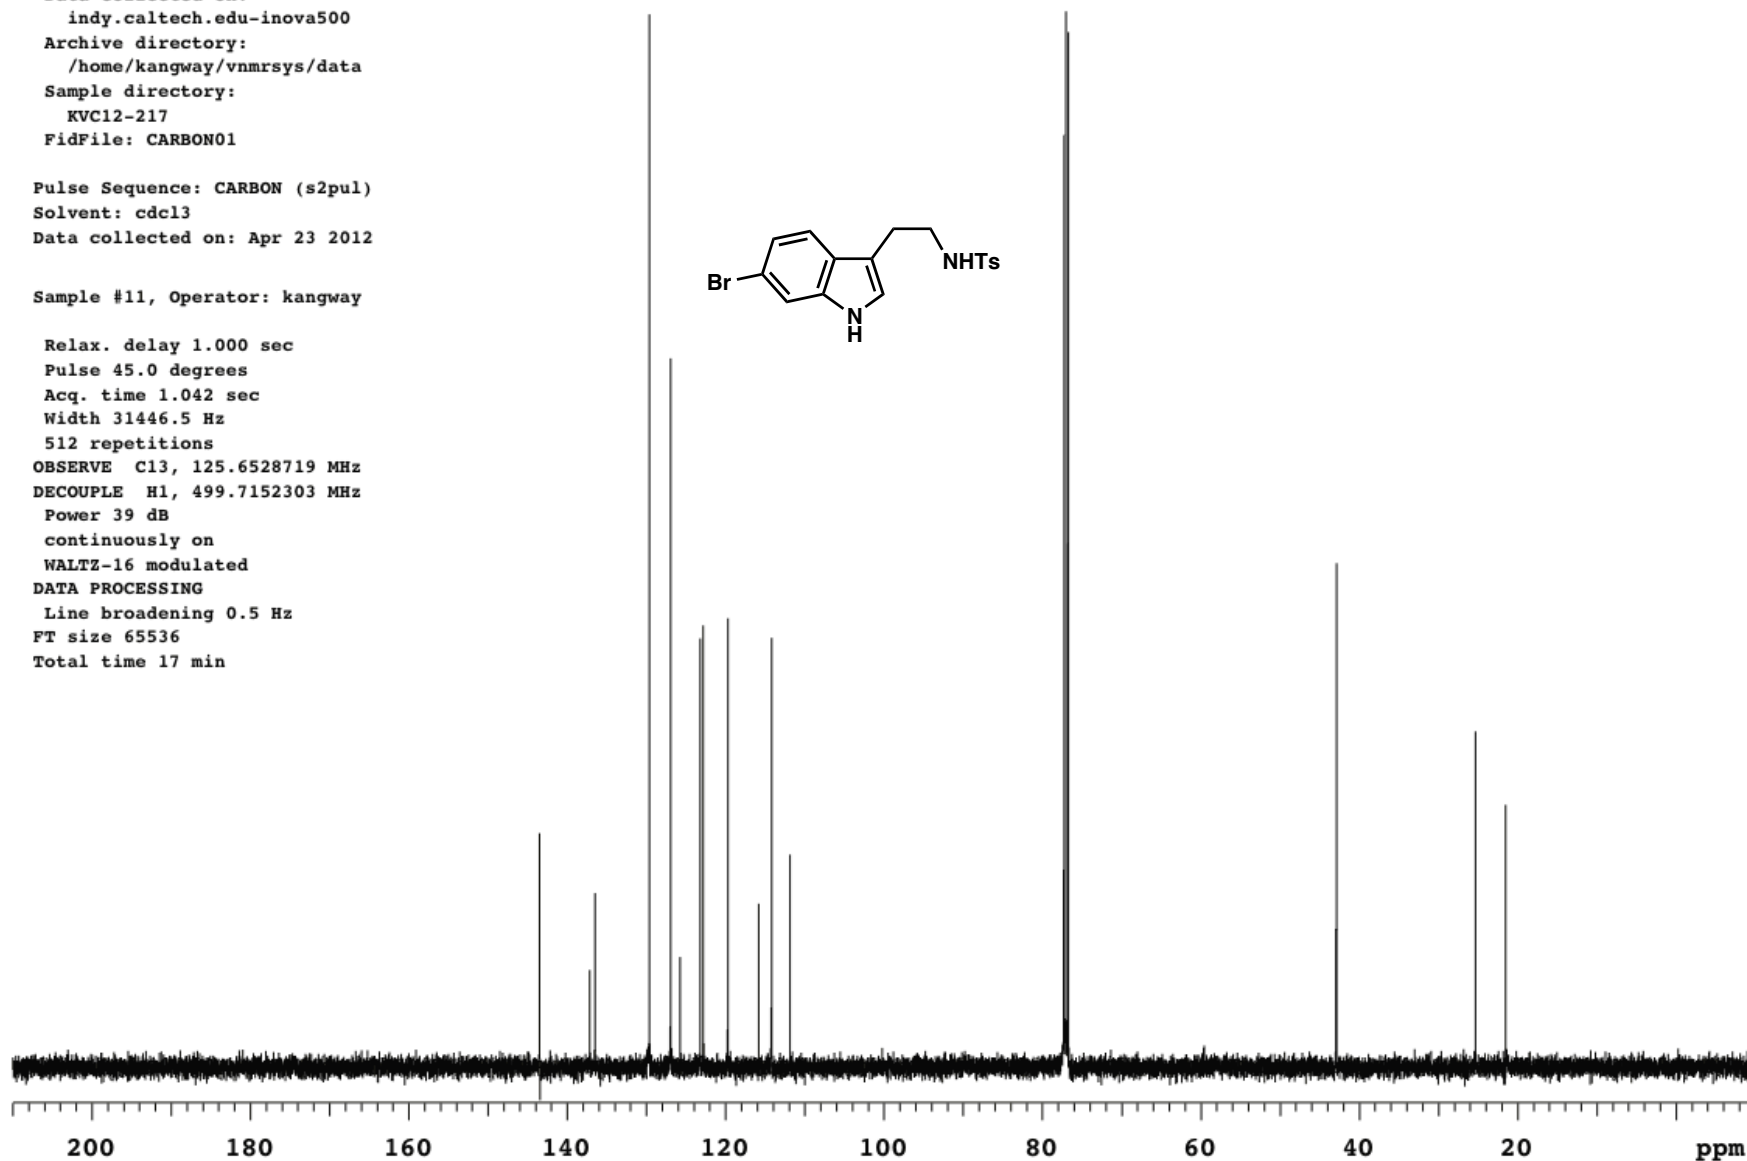

KVC12-203

Sample Name:

KVC12-203

Data Collected on:

indy.caltech.edu-inova500

Archive directory:

/home/kangway/vnmrsys/data

Sample directory:

KVC12-203

FidFile: PROTON02

Pulse Sequence: PROTON (s2pul)

Solvent: cdcl3

Data collected on: Apr 10 2012

Sample #48, Operator: kangway

Relax. delay 5.000 sec

Pulse 45.0 degrees

Acq. time 2.500 sec

Width 8000.0 Hz

32 repetitions

OBSERVE H1, 499.7127432 MHz

DATA PROCESSING

Line broadening 0.2 Hz

FT size 65536

Total time 4 min 0 sec

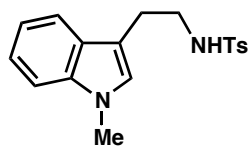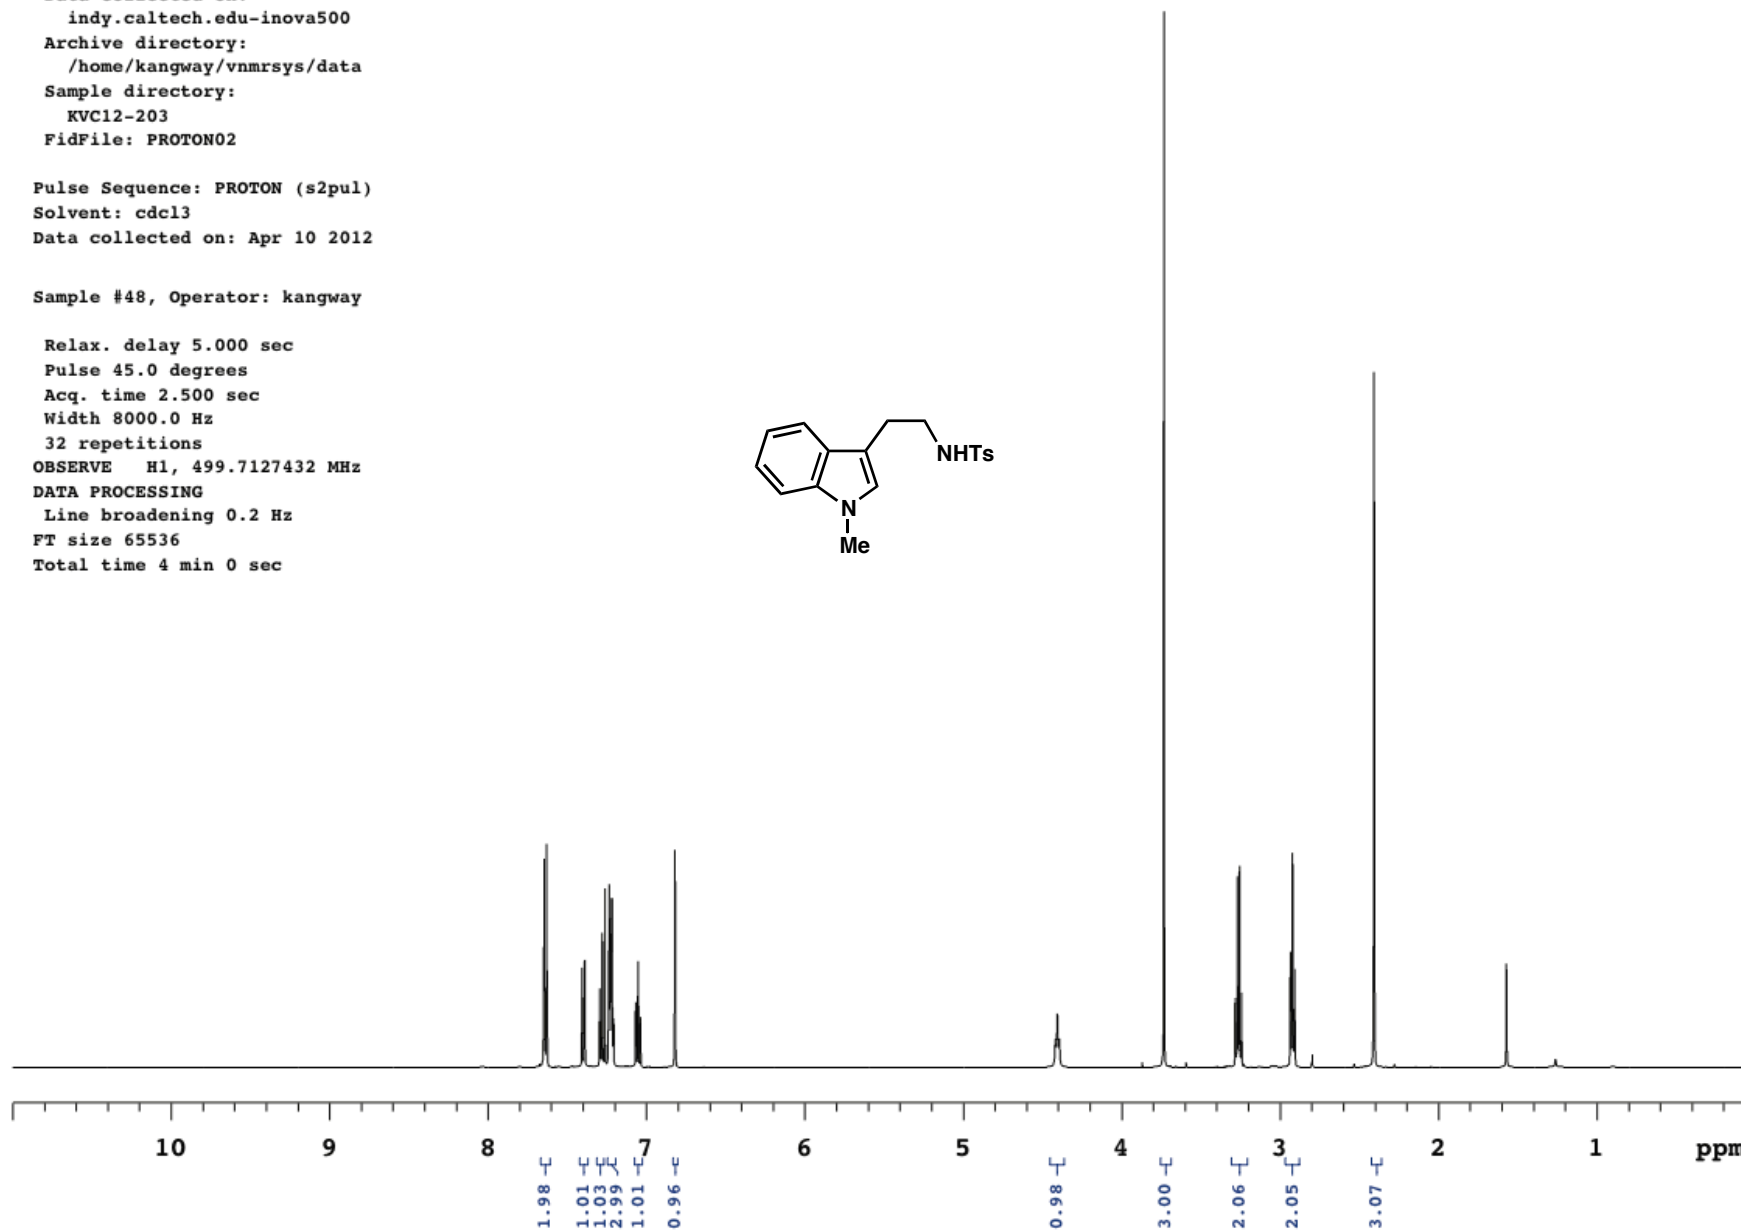

KVC12-203

Sample Name:

KVC12-203

Data Collected on:

indy.caltech.edu-inova500

Archive directory:

/home/kangway/vnmrsys/data

Sample directory:

KVC12-203

FidFile: CARBON01

Pulse Sequence: CARBON (s2pul)

Solvent: cdcl3

Data collected on: Apr 10 2012

Sample #47, Operator: kangway

Relax. delay 1.000 sec

Pulse 45.0 degrees

Acq. time 1.042 sec

Width 31446.5 Hz

512 repetitions

OBSERVE C13, 125.6528825 MHz

DECOUPLE H1, 499.7152303 MHz

Power 39 dB

continuously on

WALTZ-16 modulated

DATA PROCESSING

Line broadening 0.5 Hz

FT size 65536

Total time 17 min

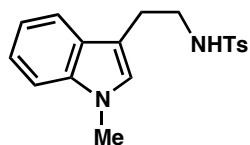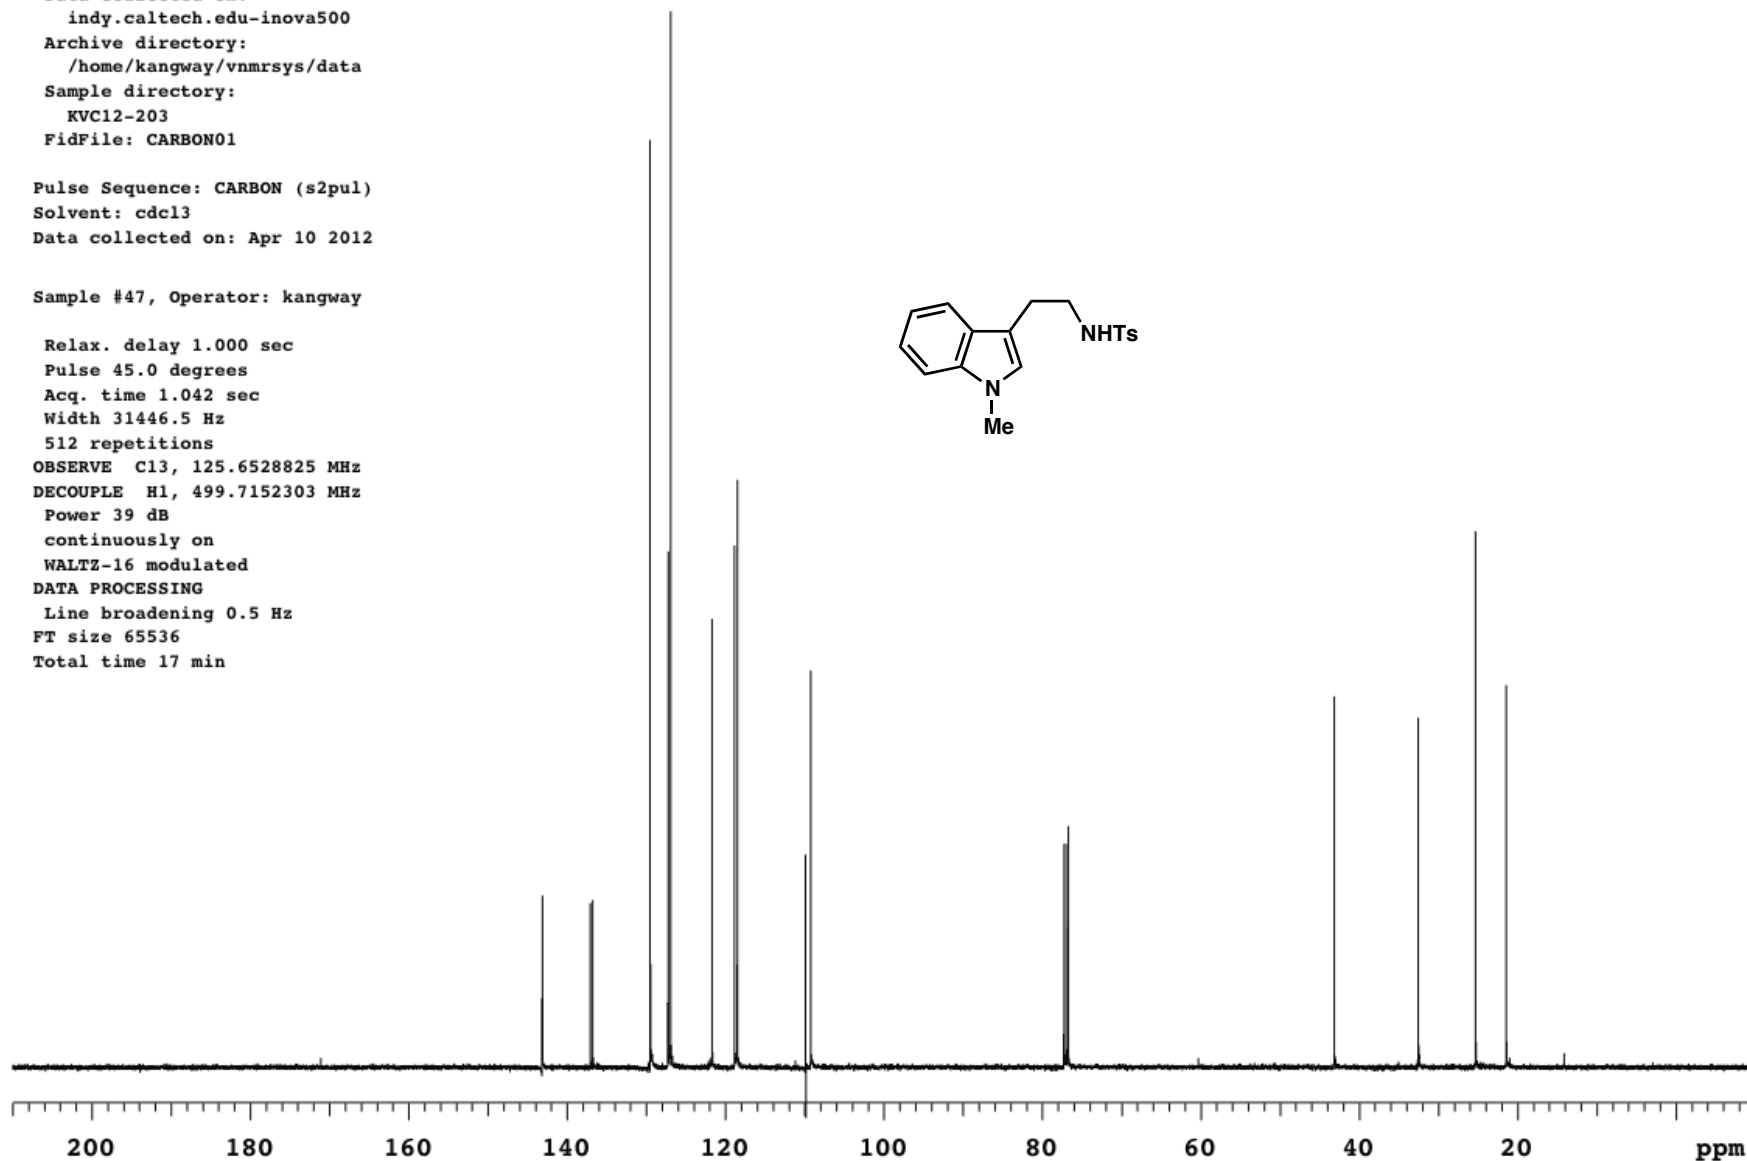

KVC12-199

Sample Name:

KVC12-199

Data Collected on:

indy.caltech.edu-inova500

Archive directory:

/home/kangway/vnmrsys/data

Sample directory:

KVC12-199

FidFile: PROTON01

Pulse Sequence: PROTON (s2pul)

Solvent: cdcl3

Data collected on: Apr 9 2012

Sample #49, Operator: kangway

Relax. delay 5.000 sec

Pulse 45.0 degrees

Acq. time 2.500 sec

Width 8000.0 Hz

32 repetitions

OBSERVE H1, 499.7225033 MHz

DATA PROCESSING

Line broadening 0.2 Hz

FT size 65536

Total time 4 min 0 sec

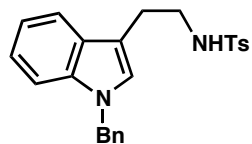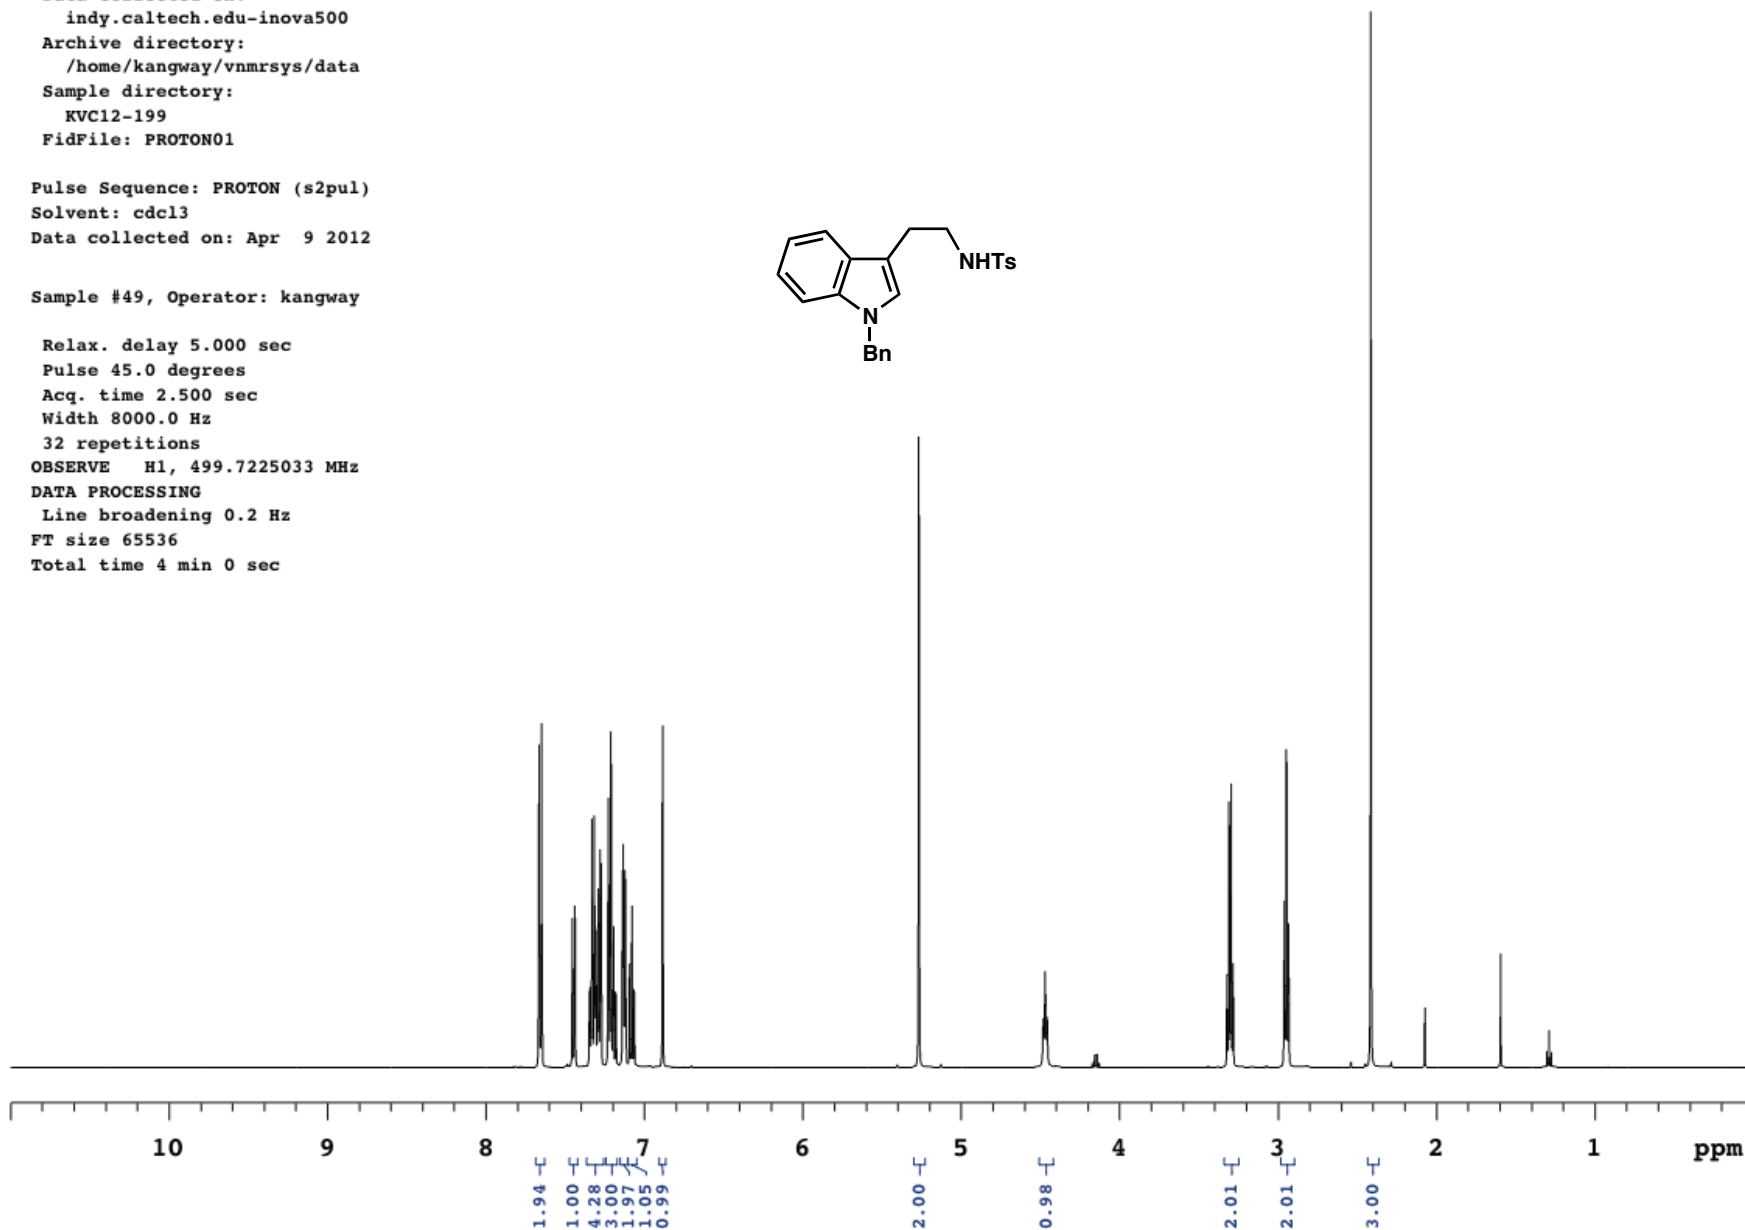

KVC12-199

Sample Name:

KVC12-199

Data Collected on:

indy.caltech.edu-inova500

Archive directory:

/home/kangway/vnmrsys/data

Sample directory:

KVC12-199

FidFile: CARBON01

Pulse Sequence: CARBON (s2pul)

Solvent: cdcl3

Data collected on: Apr 9 2012

Sample #49, Operator: kangway

Relax. delay 1.000 sec

Pulse 45.0 degrees

Acq. time 1.042 sec

Width 31446.5 Hz

512 repetitions

OBSERVE C13, 125.6553300 MHz

DECOUPLE H1, 499.7250019 MHz

Power 39 dB

continuously on

WALTZ-16 modulated

DATA PROCESSING

Line broadening 0.5 Hz

FT size 65536

Total time 17 min

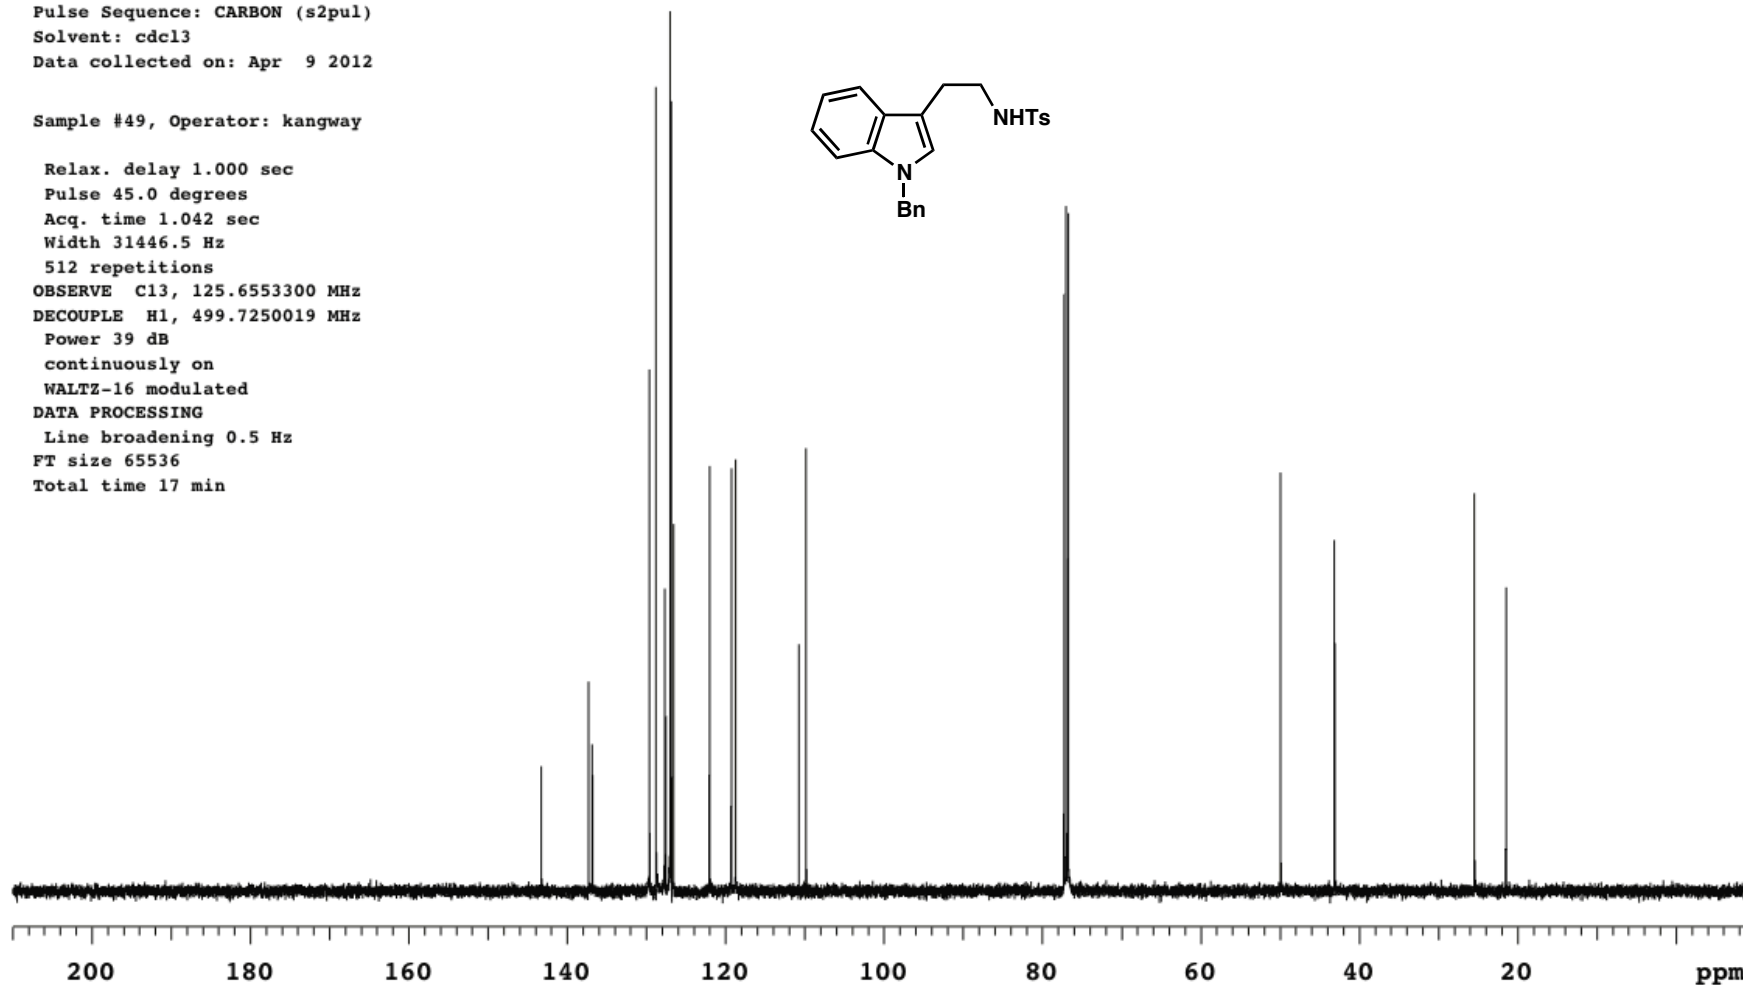

KVC11-215

Sample Name:  
KVC11-215  
Data Collected on:  
indy.caltech.edu-inova500  
Archive directory:  
/home/kangway/vnmrsys/data  
Sample directory:  
KVC11-215  
FidFile: PROTON01

Pulse Sequence: PROTON (s2pul)  
Solvent: dmsd  
Data collected on: Apr 24 2012

Sample #7, Operator: kangway

Relax. delay 5.000 sec  
Pulse 45.0 degrees  
Acq. time 2.500 sec  
Width 8000.0 Hz  
32 repetitions  
OBSERVE H1, 499.7151044 MHz  
DATA PROCESSING  
Line broadening 0.2 Hz  
FT size 65536  
Total time 4 min 0 sec

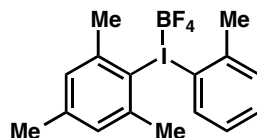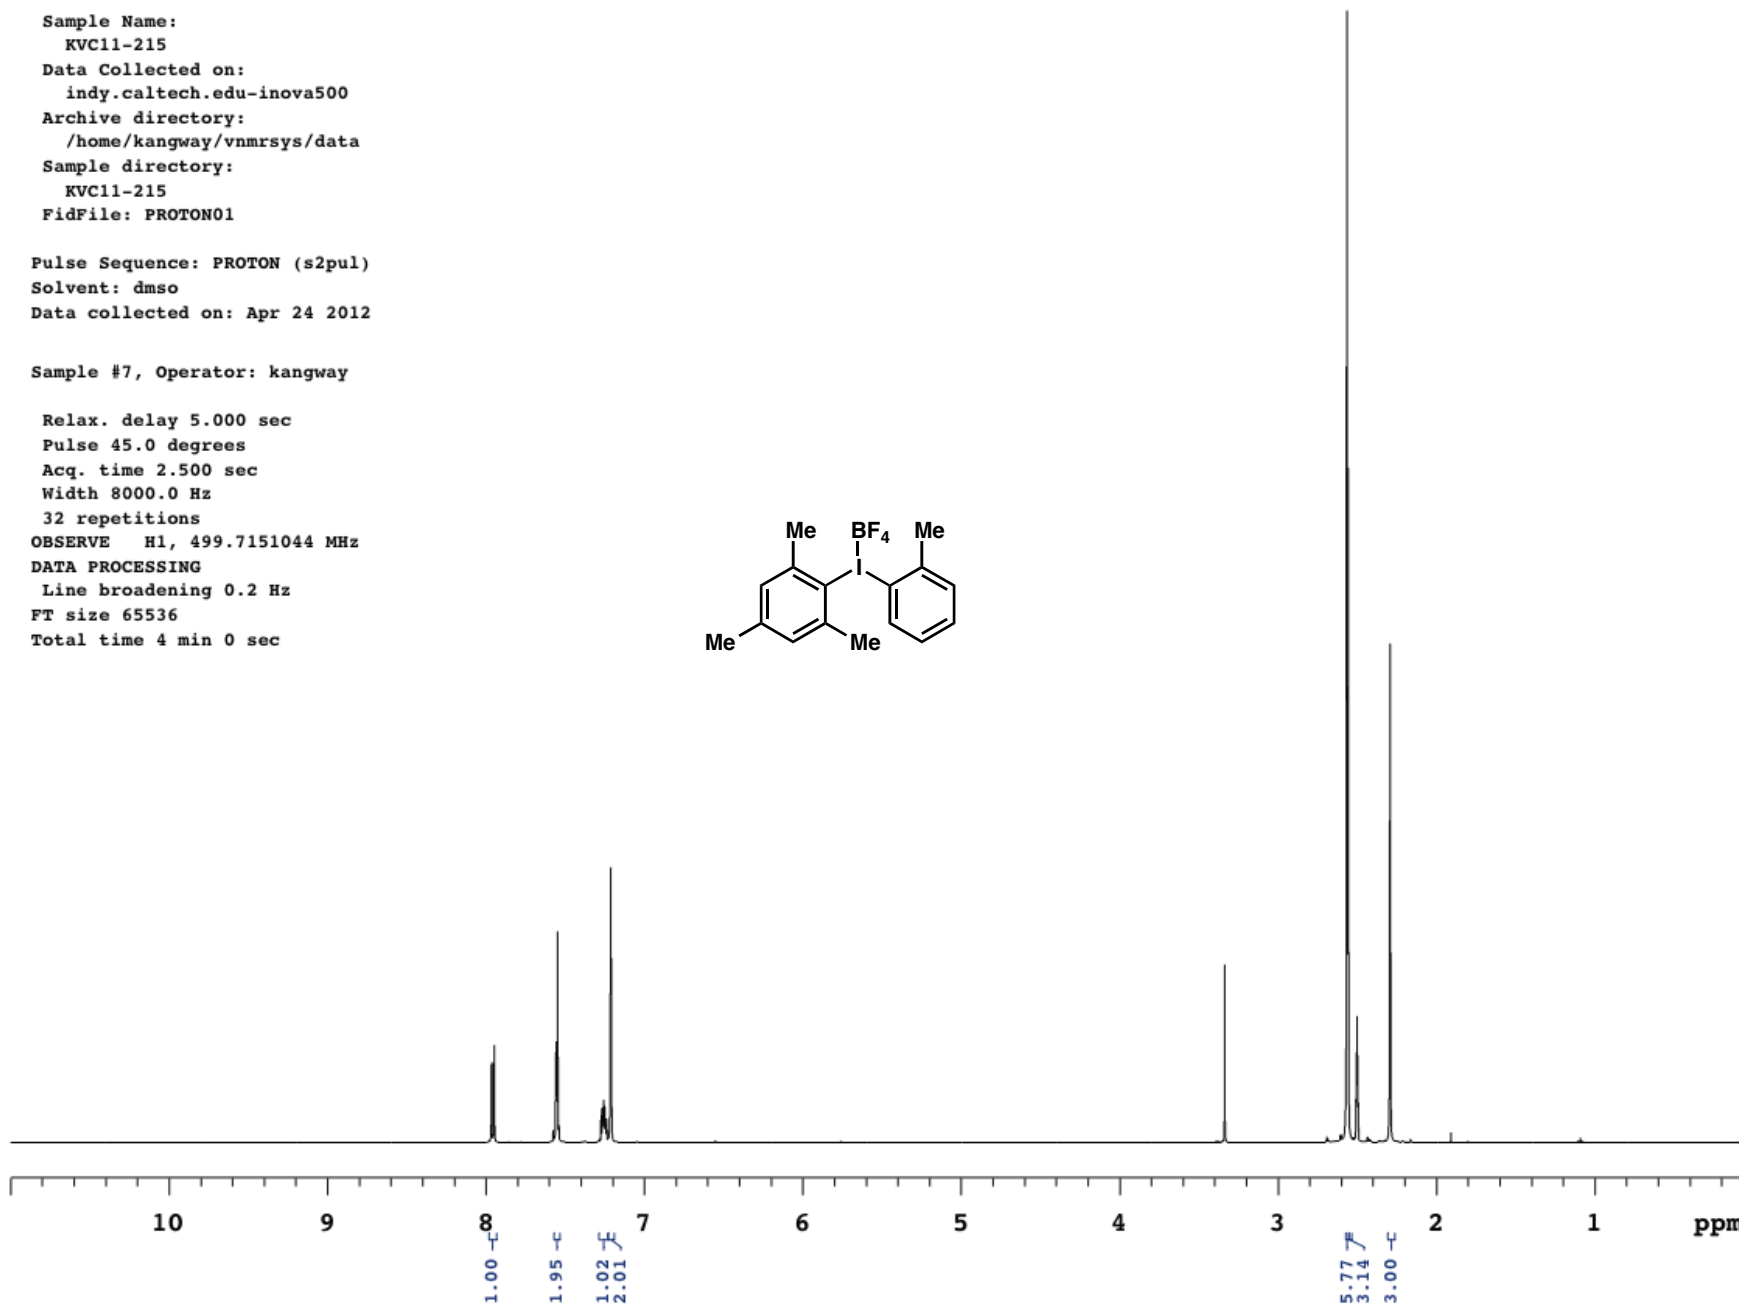



KVC11-215

Sample Name:

KVC11-215

Data Collected on:

indy.caltech.edu-inova500

Archive directory:

/home/kangway/vnmrsys/data

Sample directory:

KVC11-215

FidFile: CARBON01

Pulse Sequence: CARBON (s2pul)

Solvent: dmsO

Data collected on: Apr 24 2012

Sample #7, Operator: kangway

Relax. delay 1.000 sec

Pulse 45.0 degrees

Acq. time 1.042 sec

Width 31446.5 Hz

512 repetitions

OBSERVE C13, 125.6534597 MHz

DECOUPLE H1, 499.7176040 MHz

Power 39 dB

continuously on

WALTZ-16 modulated

DATA PROCESSING

Line broadening 0.5 Hz

FT size 65536

Total time 17 min

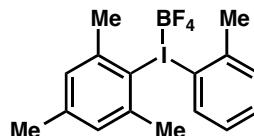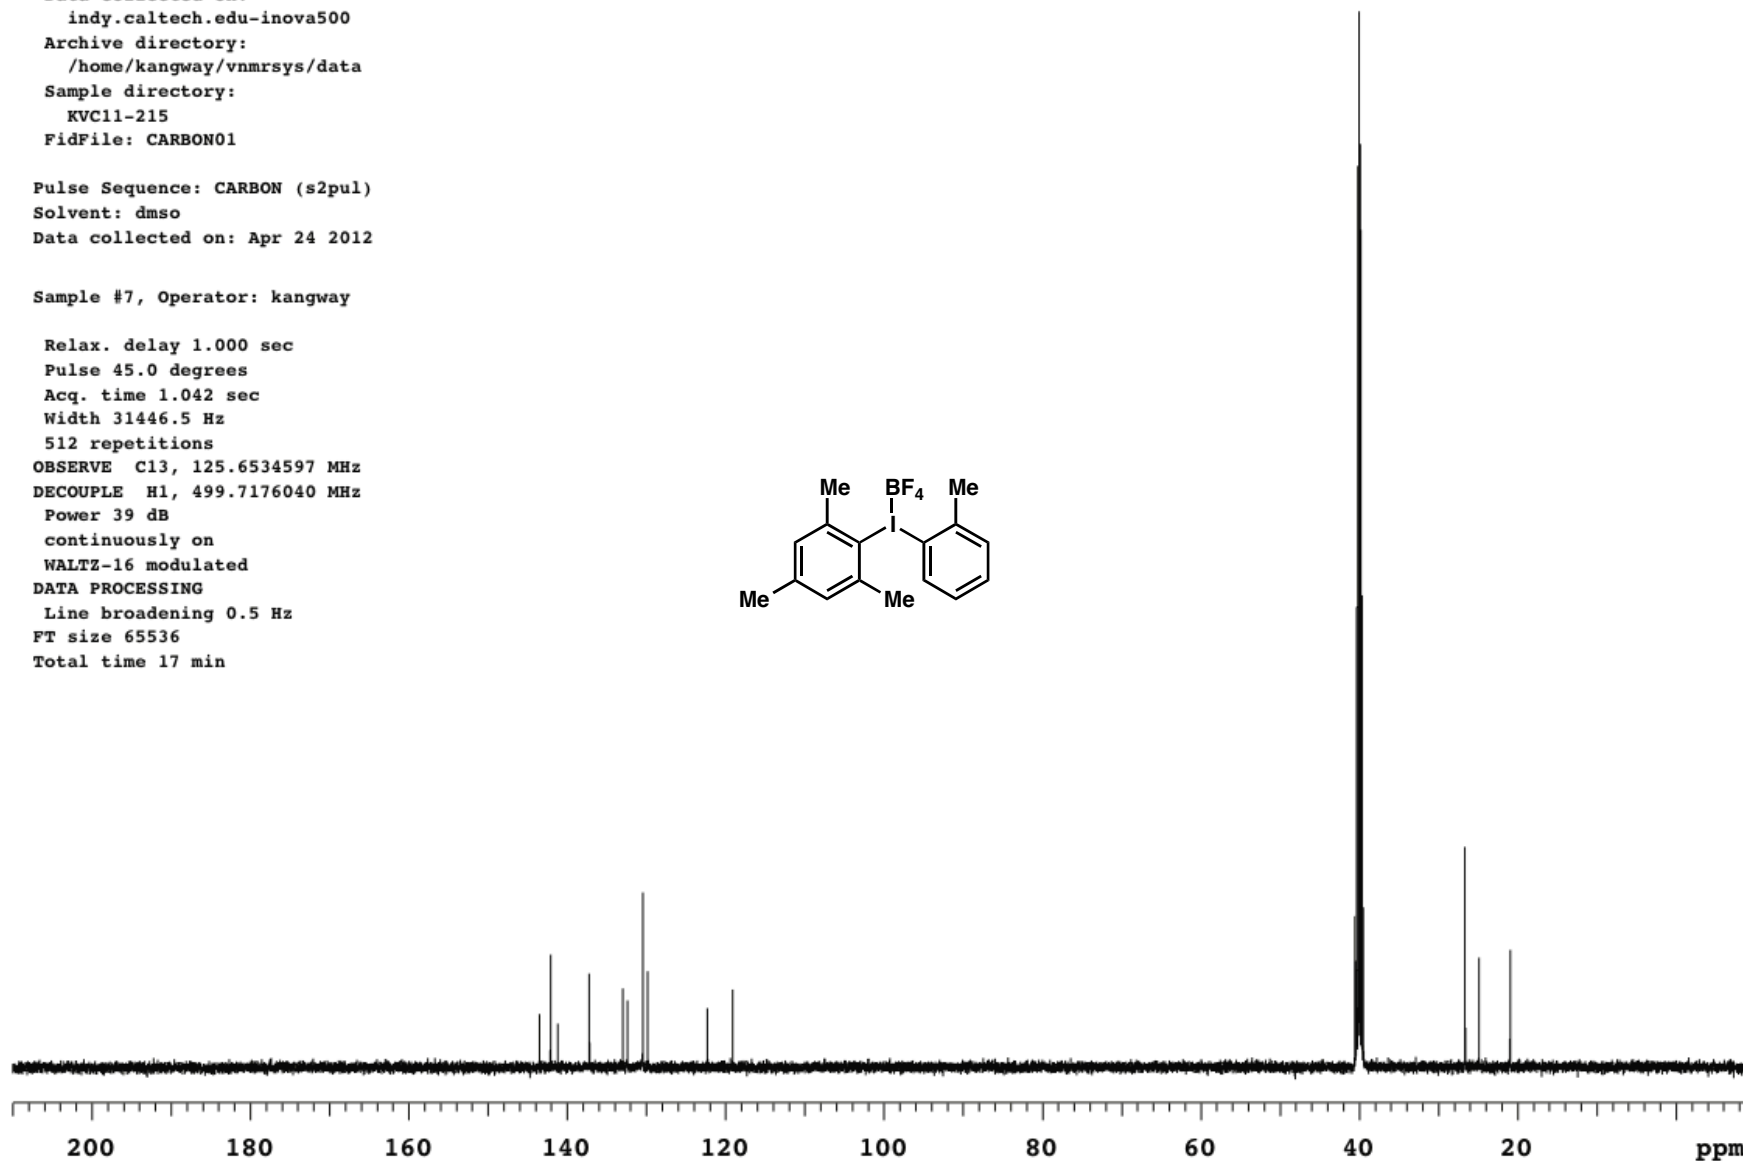

KVC11-231

Sample Name:  
KVC11-231  
Data Collected on:  
indy.caltech.edu-inova500  
Archive directory:  
/home/kangway/vnmrsys/data  
Sample directory:  
KVC11-231  
FidFile: PROTON01

Pulse Sequence: PROTON (s2pul)  
Solvent: dmsd  
Data collected on: Apr 24 2012

Sample #10, Operator: kangway

Relax. delay 5.000 sec  
Pulse 45.0 degrees  
Acq. time 2.500 sec  
Width 8000.0 Hz  
32 repetitions  
OBSERVE H1, 499.7151047 MHz  
DATA PROCESSING  
Line broadening 0.2 Hz  
FT size 65536  
Total time 4 min 0 sec

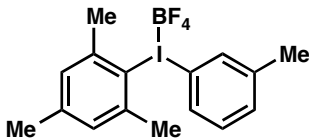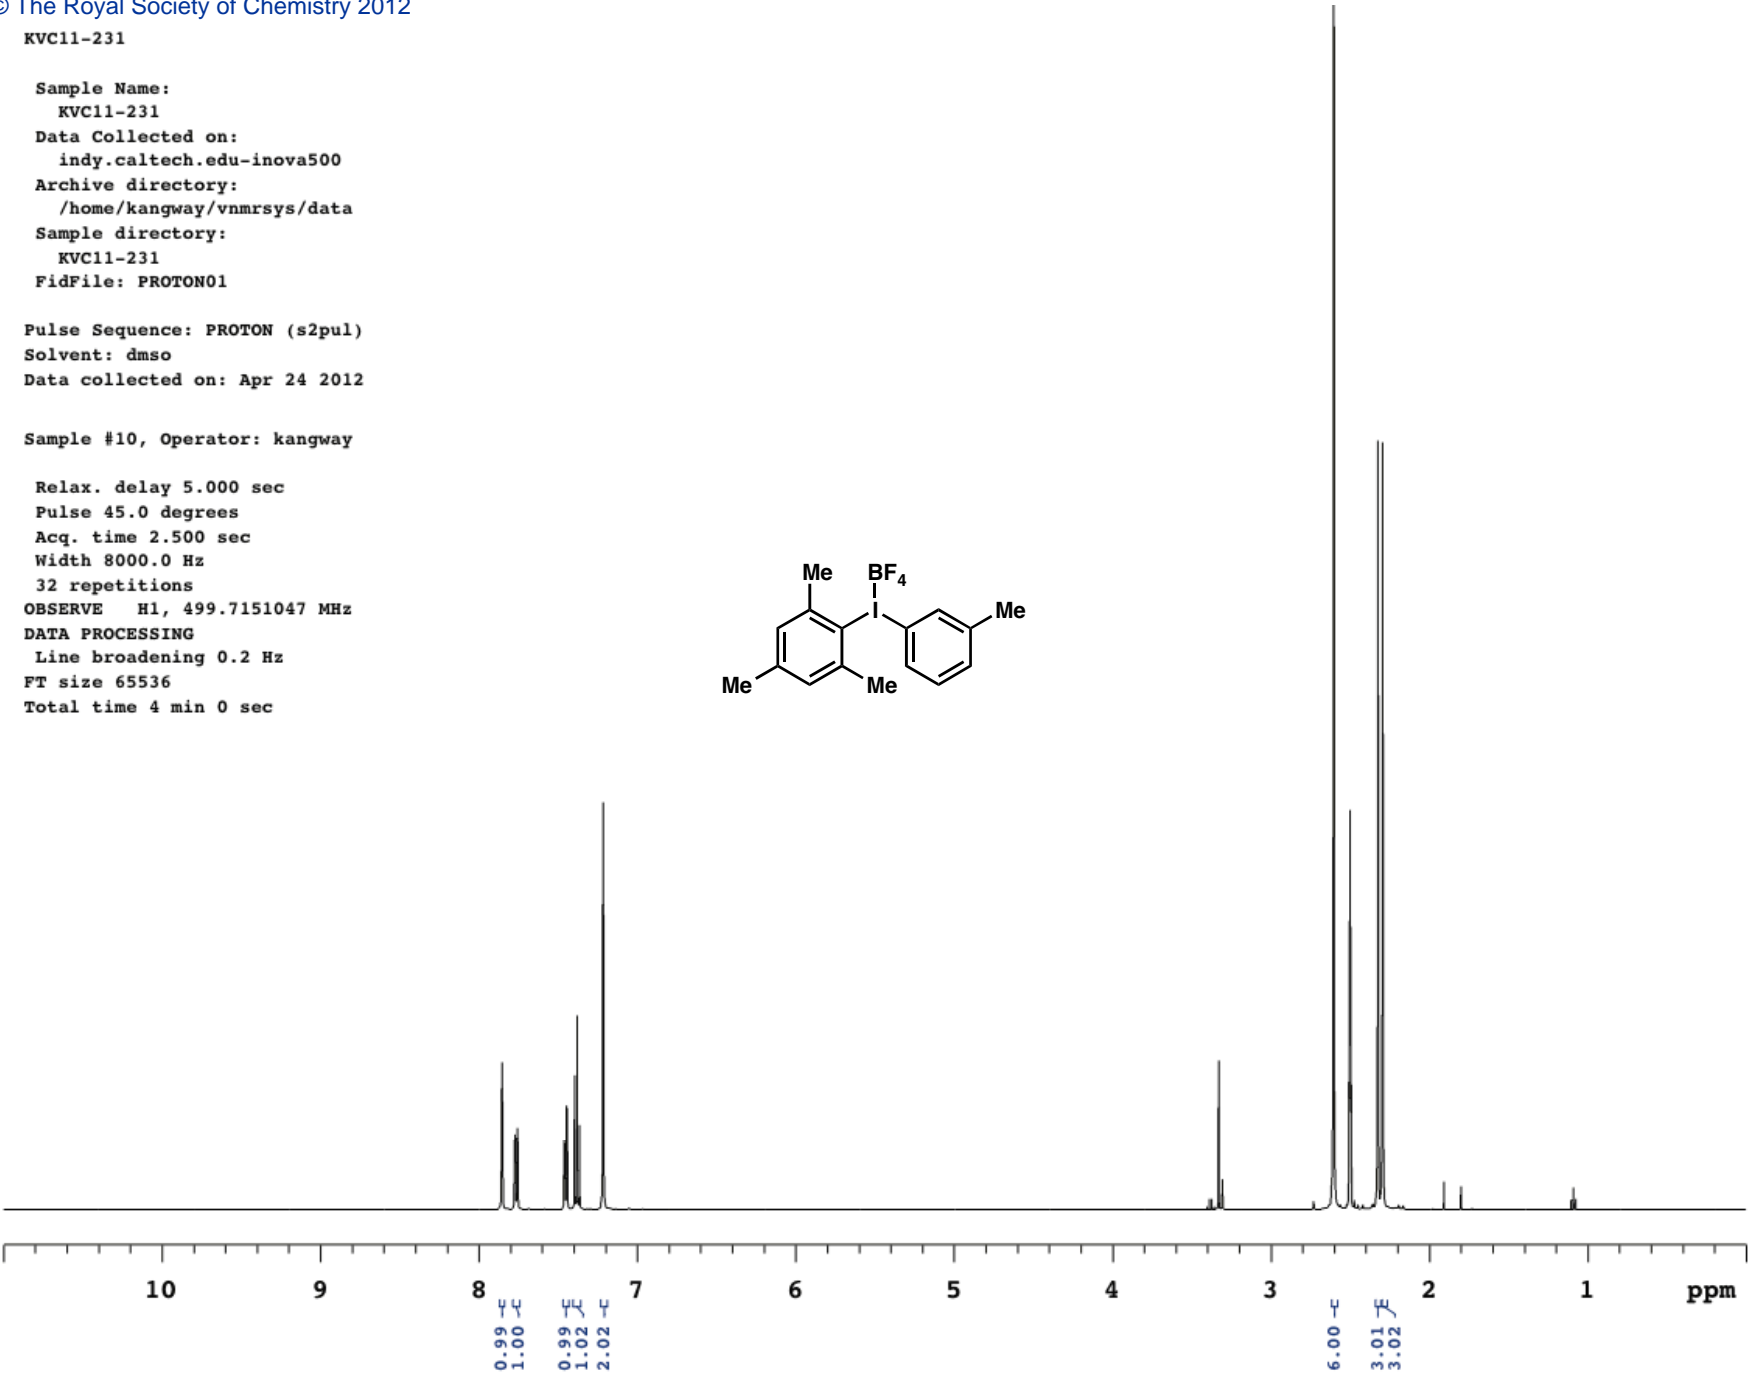

KVC11-231

Sample Name:  
KVC11-231  
Data Collected on:  
indy.caltech.edu-inova500  
Archive directory:  
/home/kangway/vnmrsys/data  
Sample directory:  
KVC11-231  
FidFile: CARBON02

Pulse Sequence: CARBON (s2pul)  
Solvent: dmsd  
Data collected on: Apr 24 2012

Sample #47, Operator: kangway

Relax. delay 1.000 sec  
Pulse 45.0 degrees  
Acq. time 1.042 sec  
Width 31446.5 Hz  
512 repetitions  
OBSERVE C13, 125.6534588 MHz  
DECOUPLE H1, 499.7176040 MHz  
Power 39 dB  
continuously on  
WALTZ-16 modulated  
DATA PROCESSING  
Line broadening 0.5 Hz  
FT size 65536  
Total time 17 min

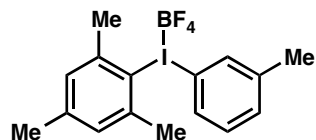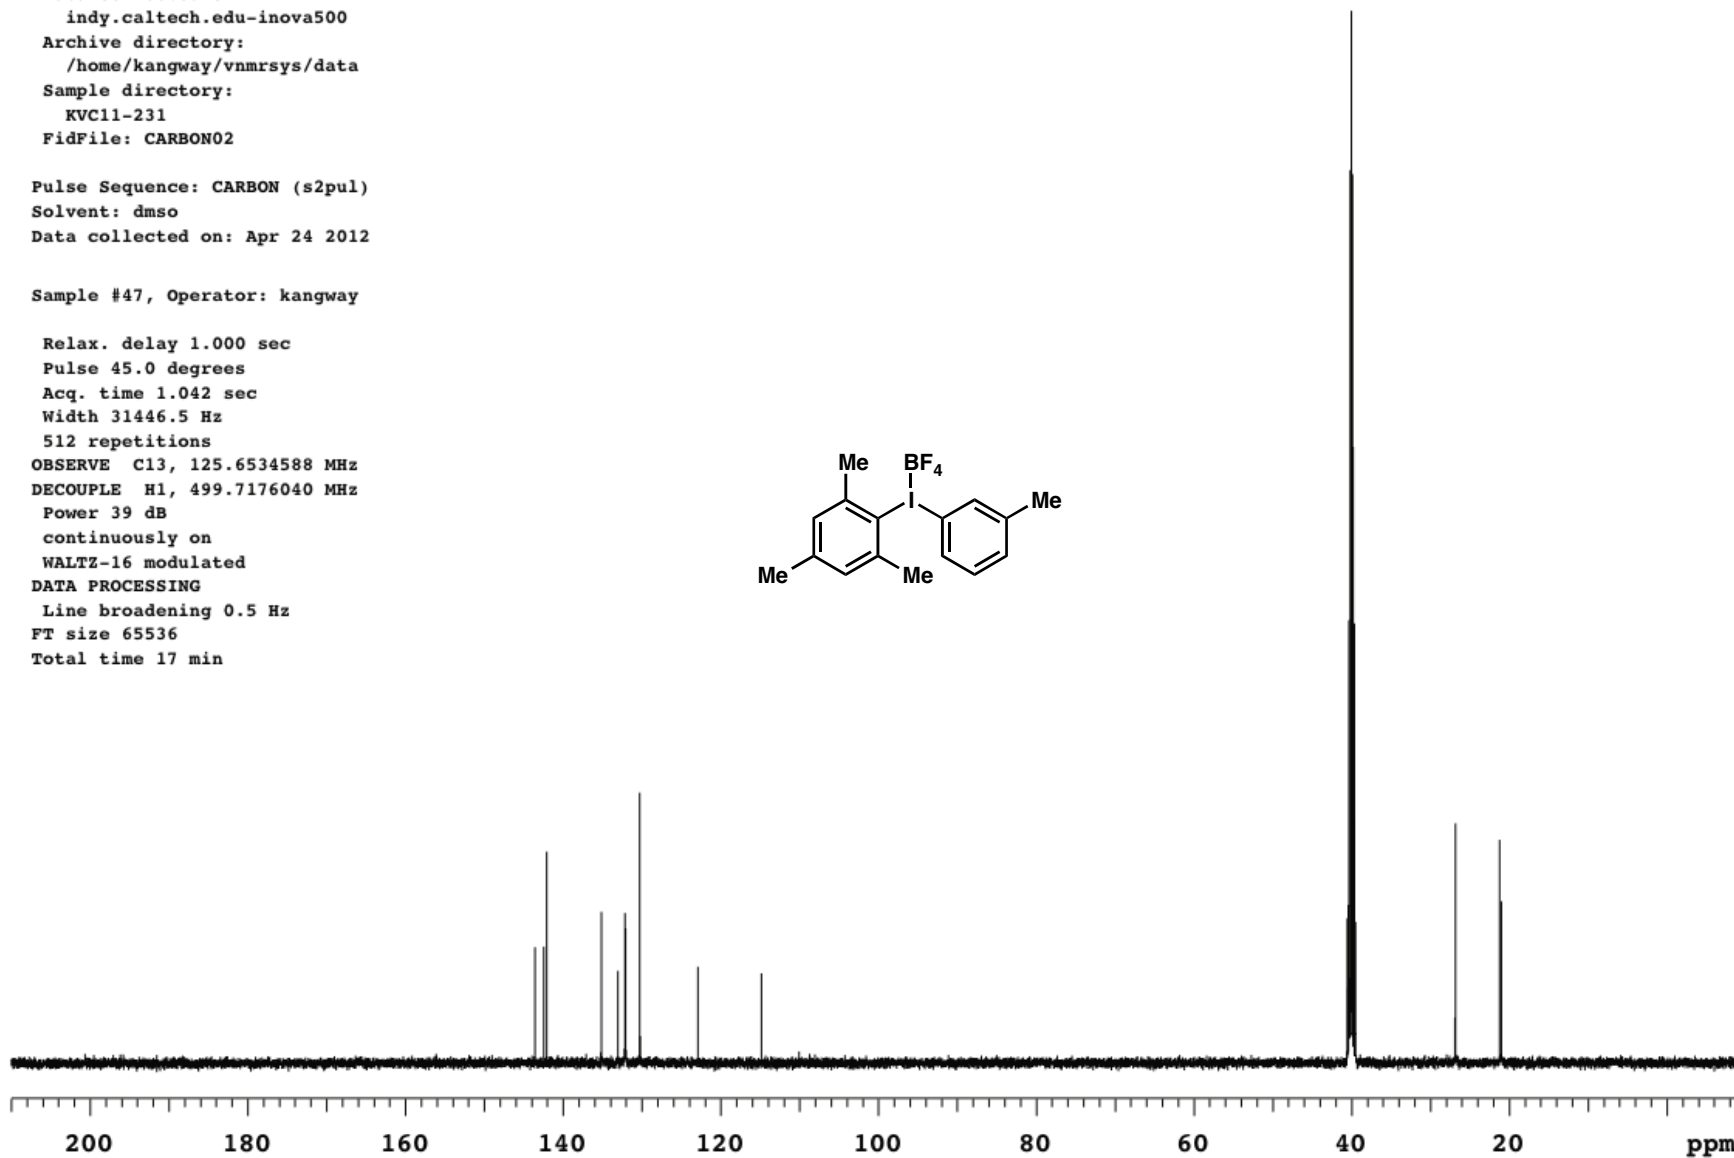

KVC11-217

Sample Name:  
KVC11-217  
Data Collected on:  
indy.caltech.edu-inova500  
Archive directory:  
/home/kangway/vnmrsys/data  
Sample directory:  
KVC11-217  
FidFile: PROTON01

Pulse Sequence: PROTON (s2pul)  
Solvent: dmsd  
Data collected on: Apr 24 2012

Sample #9, Operator: kangway

Relax. delay 5.000 sec  
Pulse 45.0 degrees  
Acq. time 2.500 sec  
Width 8000.0 Hz  
32 repetitions  
OBSERVE H1, 499.7151047 MHz  
DATA PROCESSING  
Line broadening 0.2 Hz  
FT size 65536  
Total time 4 min 0 sec

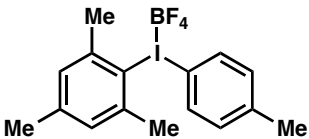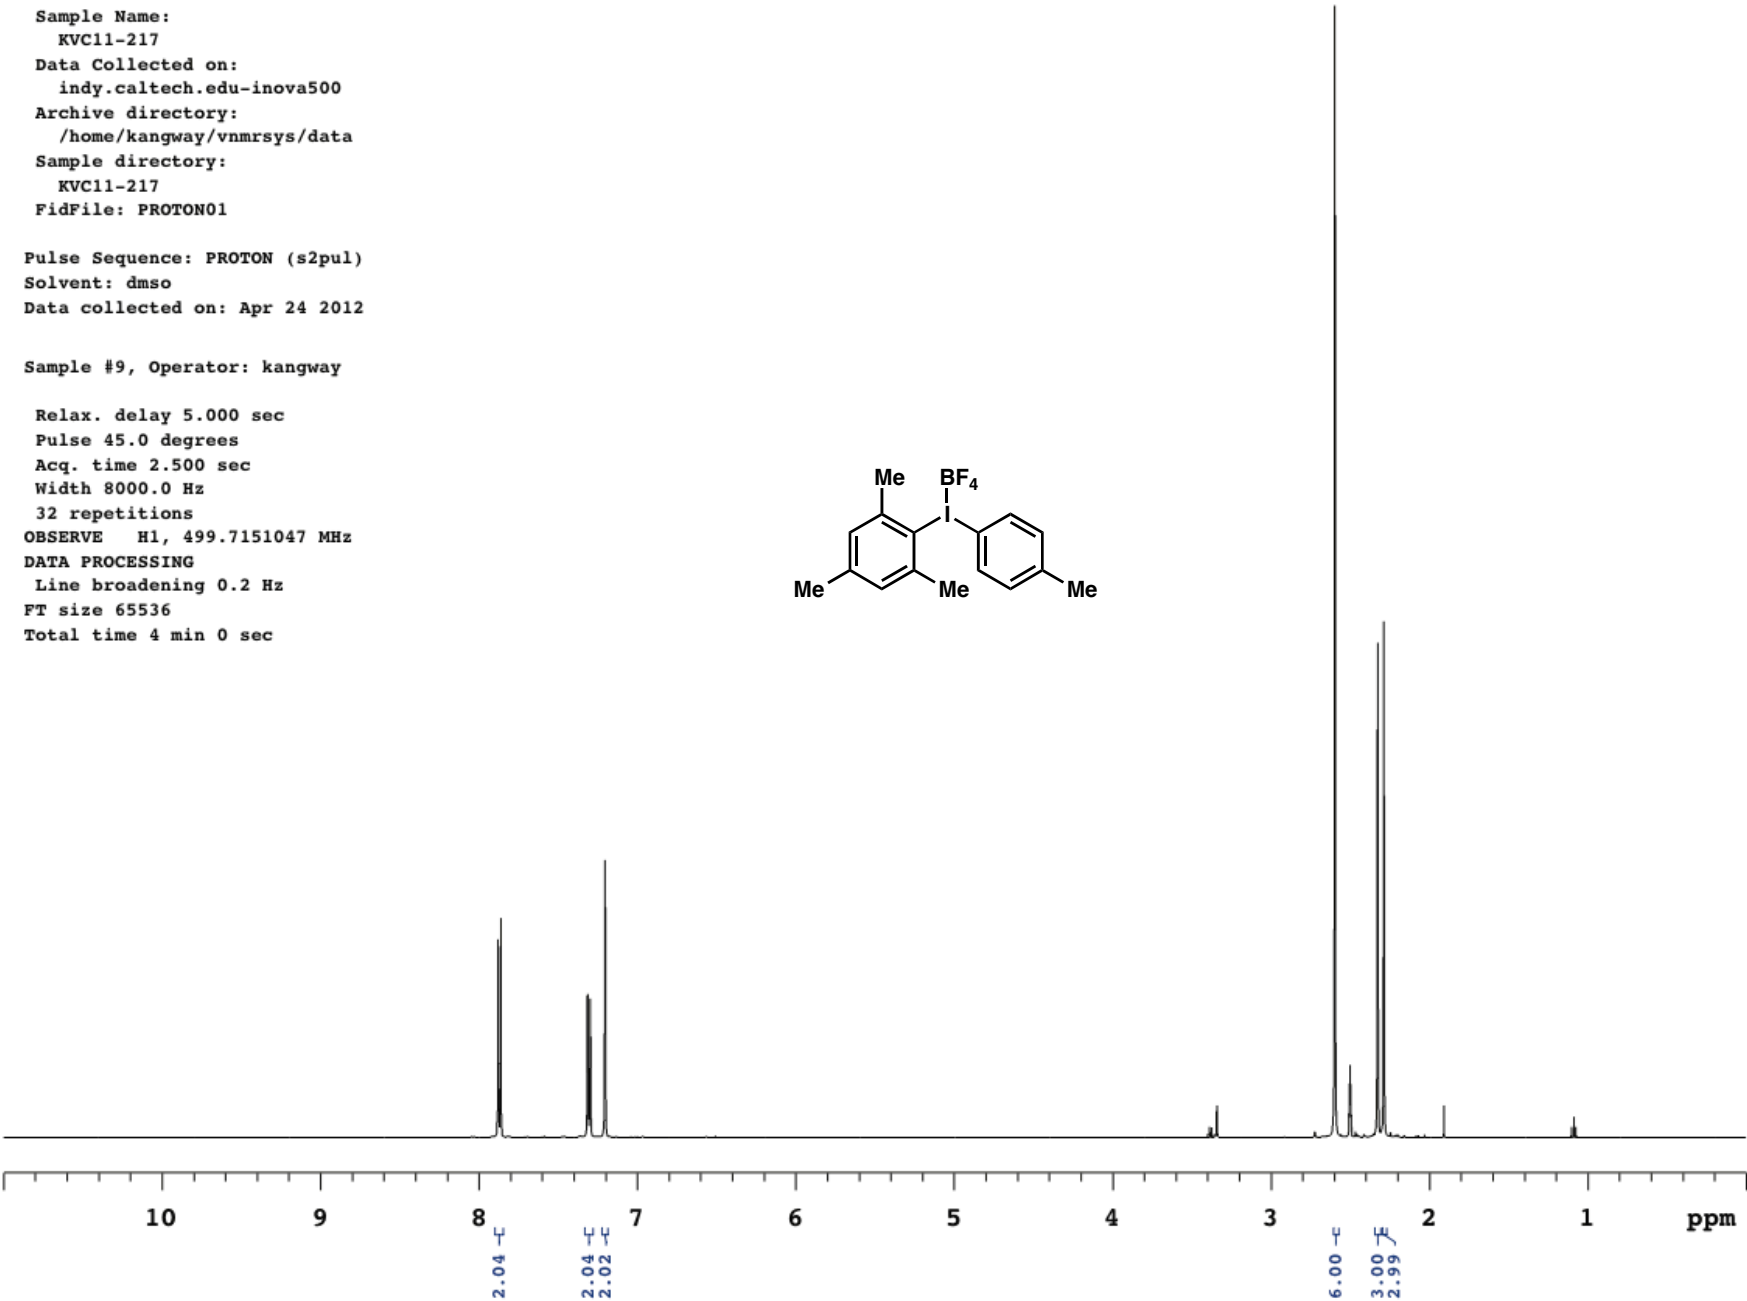

KVC11-217

Sample Name:

KVC11-217

Data Collected on:

indy.caltech.edu-inova500

Archive directory:

/home/kangway/vnmrsys/data

Sample directory:

KVC11-217

FidFile: CARBON01

Pulse Sequence: CARBON (s2pul)

Solvent: dmsd

Data collected on: Apr 24 2012

Sample #9, Operator: kangway

Relax. delay 1.000 sec

Pulse 45.0 degrees

Acq. time 1.042 sec

Width 31446.5 Hz

512 repetitions

OBSERVE C13, 125.6534588 MHz

DECOUPLE H1, 499.7176040 MHz

Power 39 dB

continuously on

WALTZ-16 modulated

DATA PROCESSING

Line broadening 0.5 Hz

FT size 65536

Total time 17 min

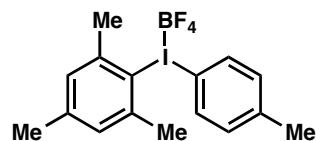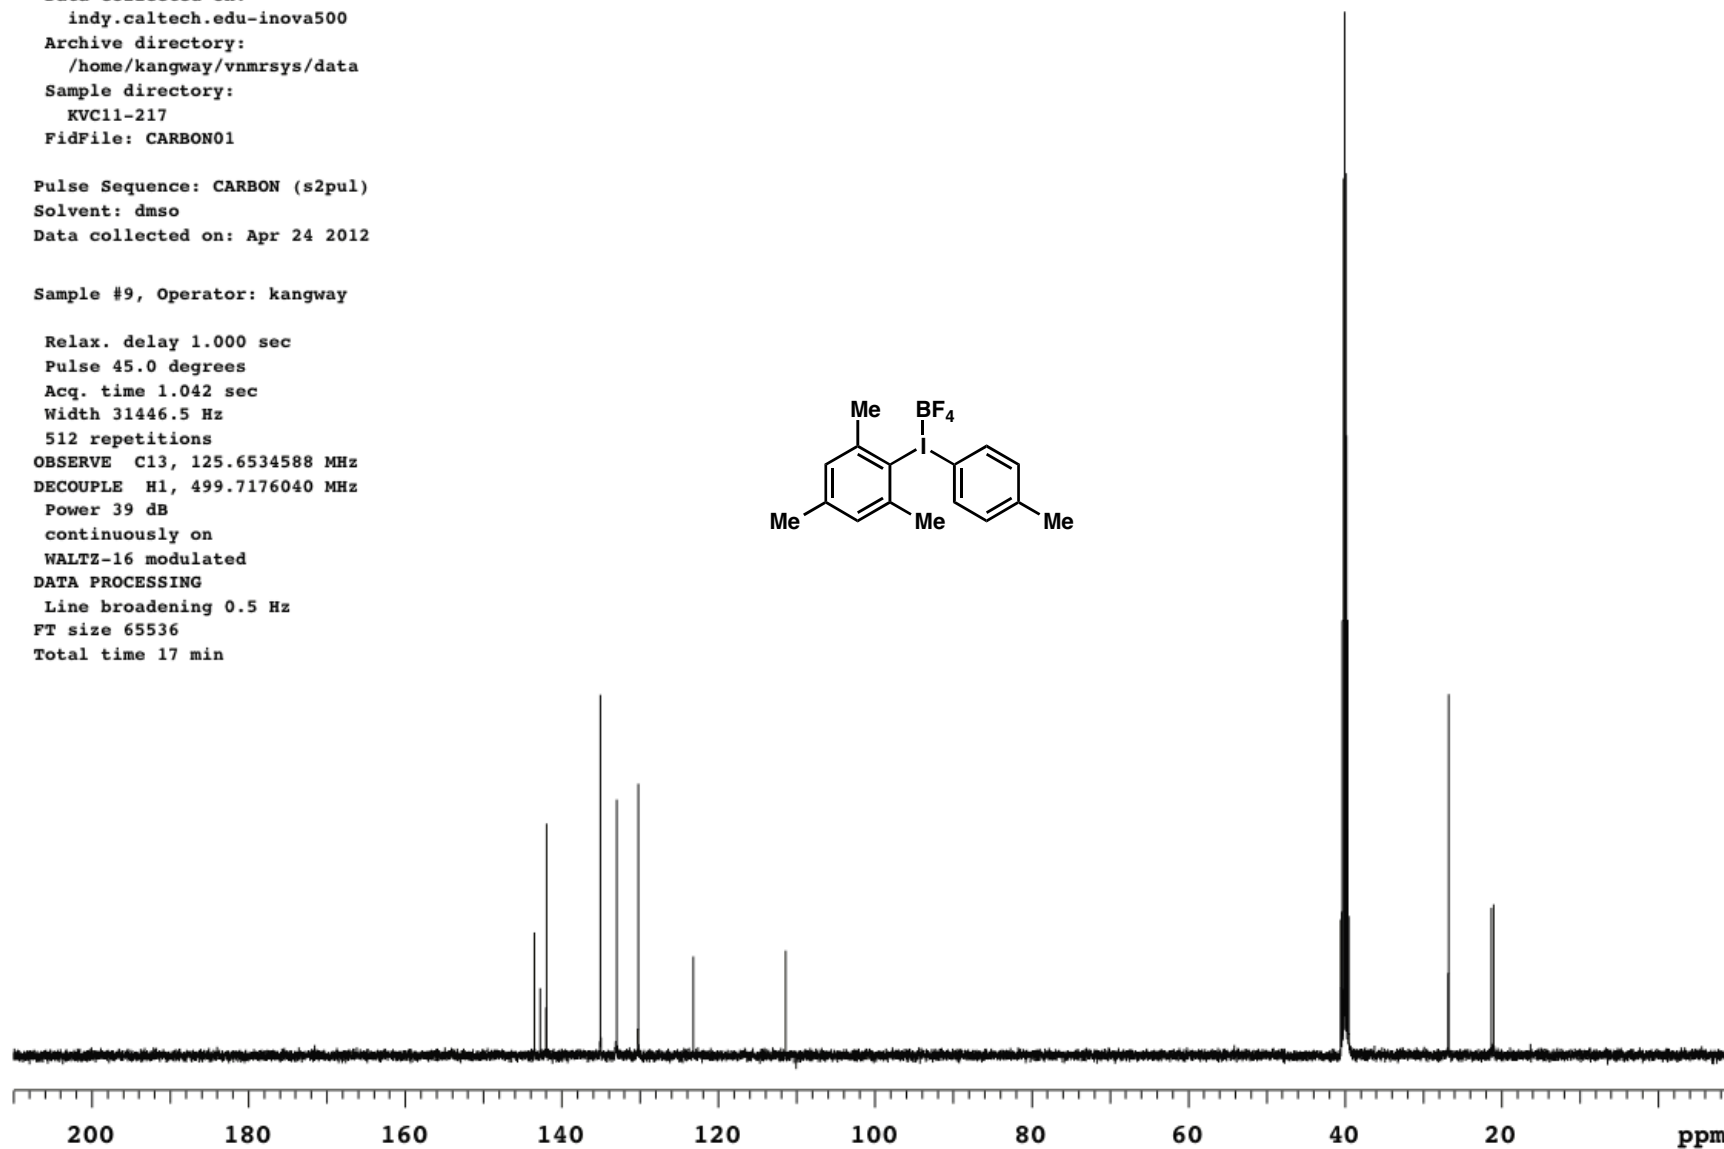

KVC11-251

Sample Name:

KVC11-251

Data Collected on:

indy.caltech.edu-inova500

Archive directory:

/home/kangway/vnmrsys/data

Sample directory:

KVC11-251

FidFile: PROTON01

Pulse Sequence: PROTON (s2pul)

Solvent: dmsd

Data collected on: Apr 23 2012

Sample #2, Operator: kangway

Relax. delay 5.000 sec

Pulse 45.0 degrees

Acq. time 2.500 sec

Width 8000.0 Hz

32 repetitions

OBSERVE H1, 499.7151044 MHz

DATA PROCESSING

Line broadening 0.2 Hz

FT size 65536

Total time 4 min 0 sec

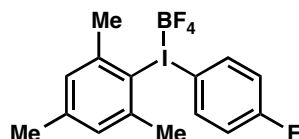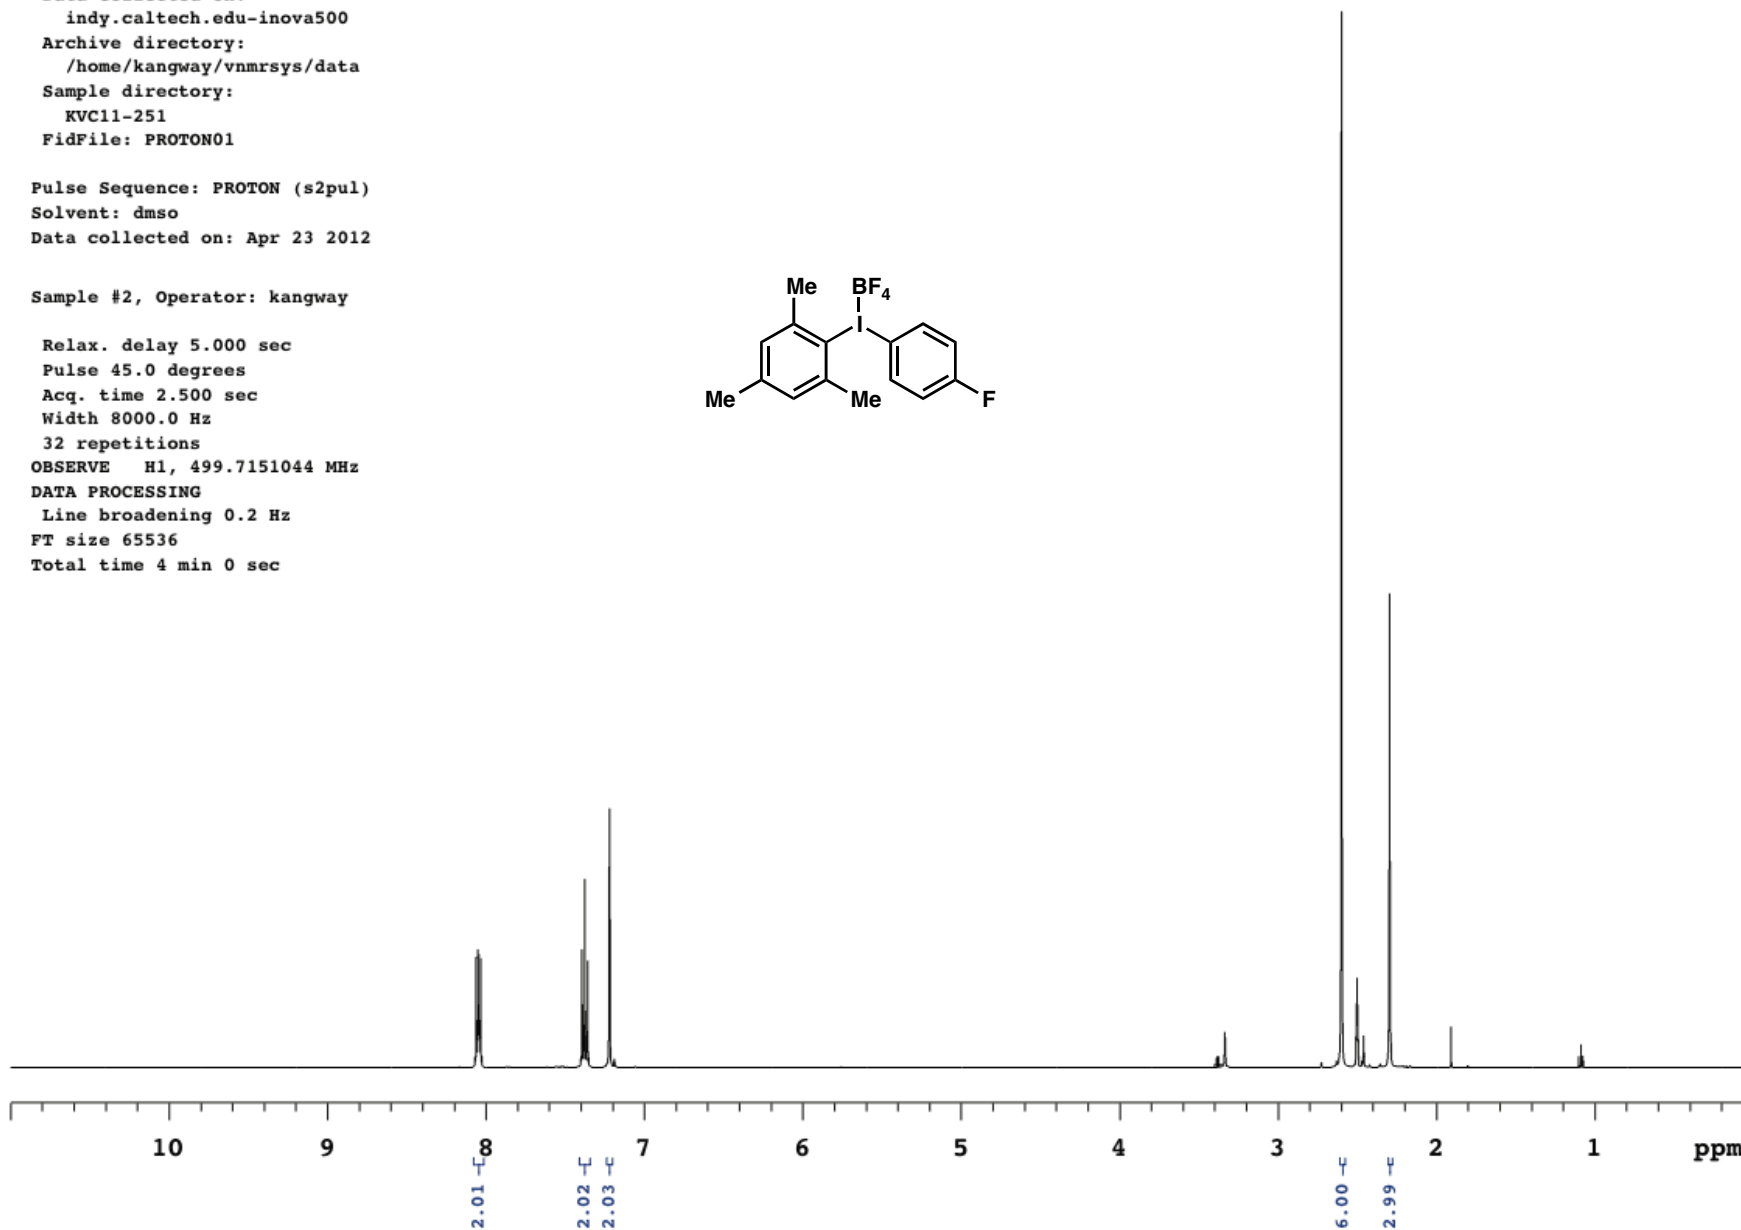

KVC11-251

Sample Name:  
KVC11-251  
Data Collected on:  
indy.caltech.edu-inova500  
Archive directory:  
/home/kangway/vnmrsys/data  
Sample directory:  
KVC11-251  
FidFile: CARBON02

Pulse Sequence: CARBON (s2pul)  
Solvent: dmsd  
Data collected on: Apr 24 2012

Sample #48, Operator: kangway

Relax. delay 1.000 sec  
Pulse 45.0 degrees  
Acq. time 1.042 sec  
Width 31446.5 Hz  
512 repetitions  
OBSERVE C13, 125.6534588 MHz  
DECOUPLE H1, 499.7176040 MHz  
Power 39 dB  
continuously on  
WALTZ-16 modulated  
DATA PROCESSING  
Line broadening 0.5 Hz  
FT size 65536  
Total time 17 min

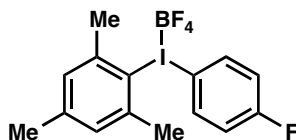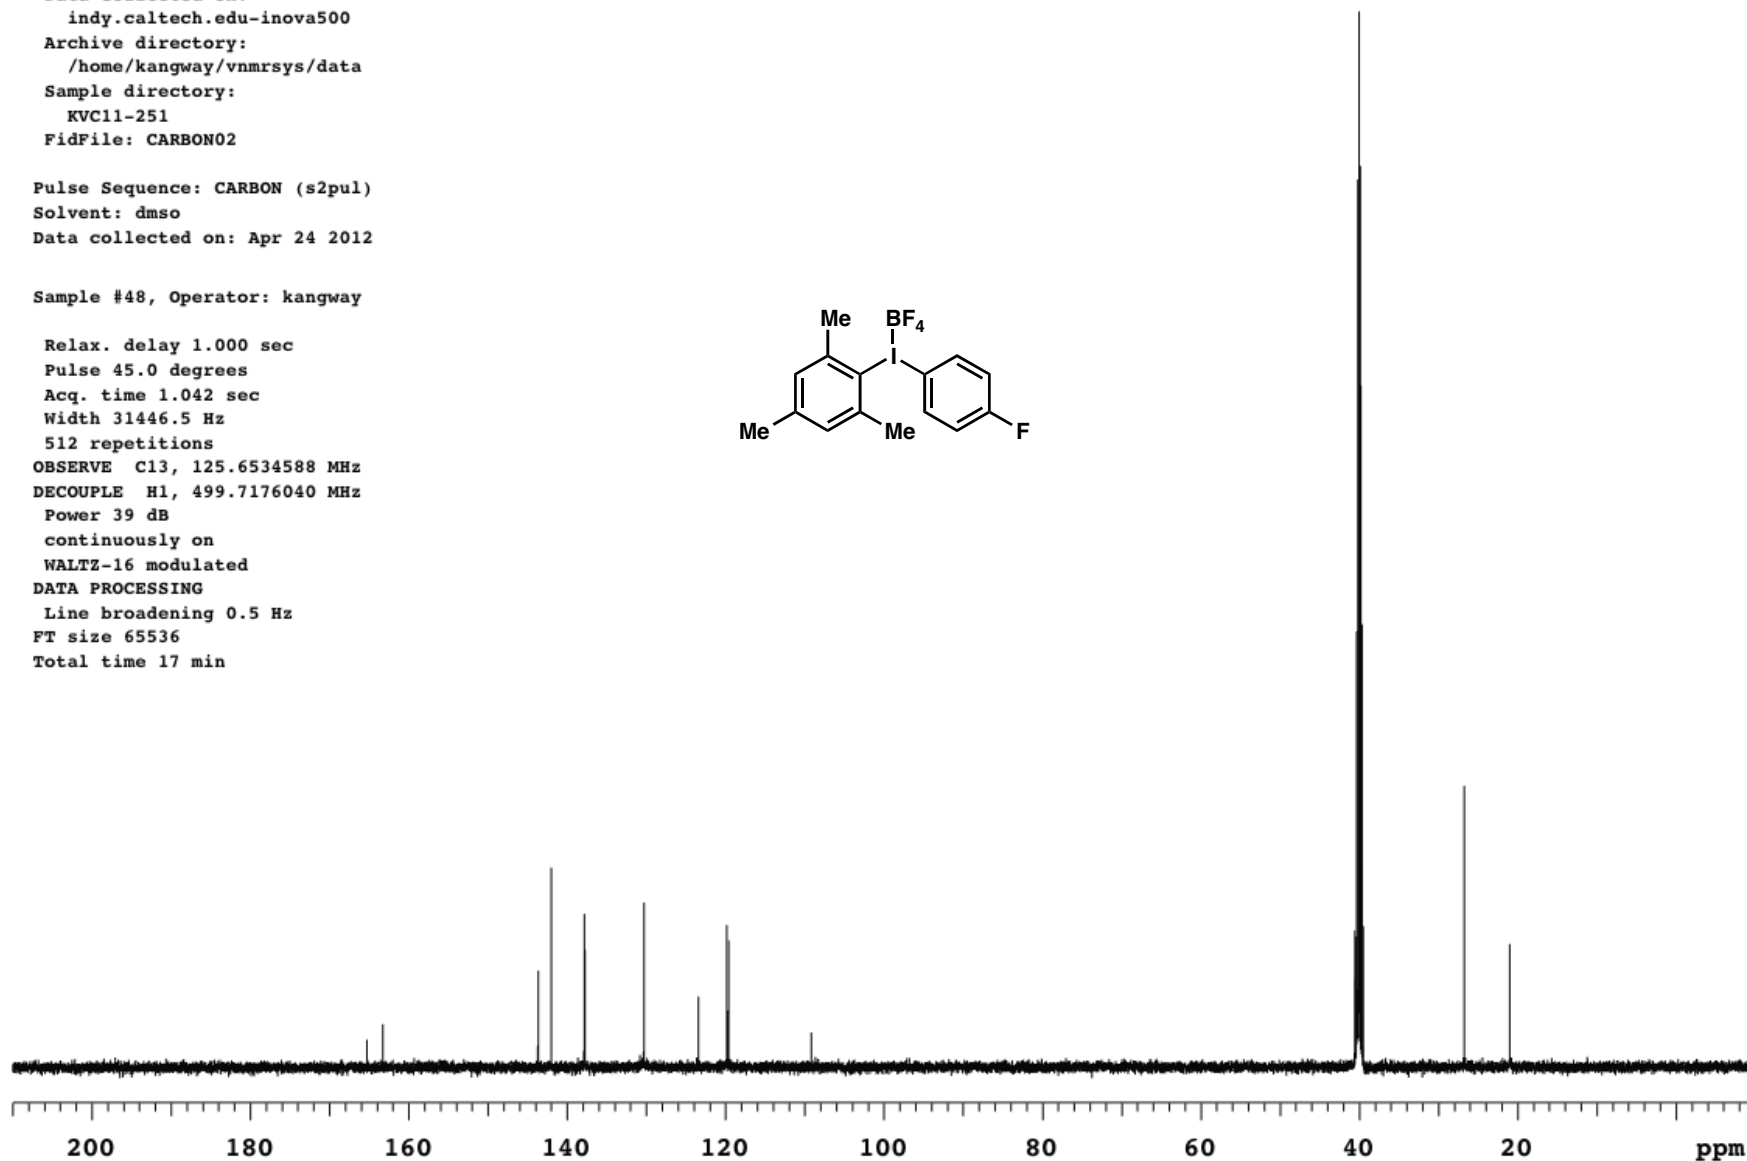

KVC11-289

Sample Name:

KVC11-289

Data Collected on:

indy.caltech.edu-inova500

Archive directory:

/home/kangway/vnmrsys/data

Sample directory:

KVC11-289

FidFile: PROTON01

Pulse Sequence: PROTON (s2pul)

Solvent: dmsd

Data collected on: Apr 24 2012

Sample #12, Operator: kangway

Relax. delay 5.000 sec

Pulse 45.0 degrees

Acq. time 2.500 sec

Width 8000.0 Hz

32 repetitions

OBSERVE H1, 499.7151047 MHz

DATA PROCESSING

Line broadening 0.2 Hz

FT size 65536

Total time 4 min 0 sec

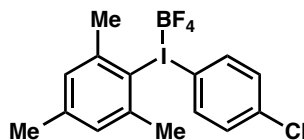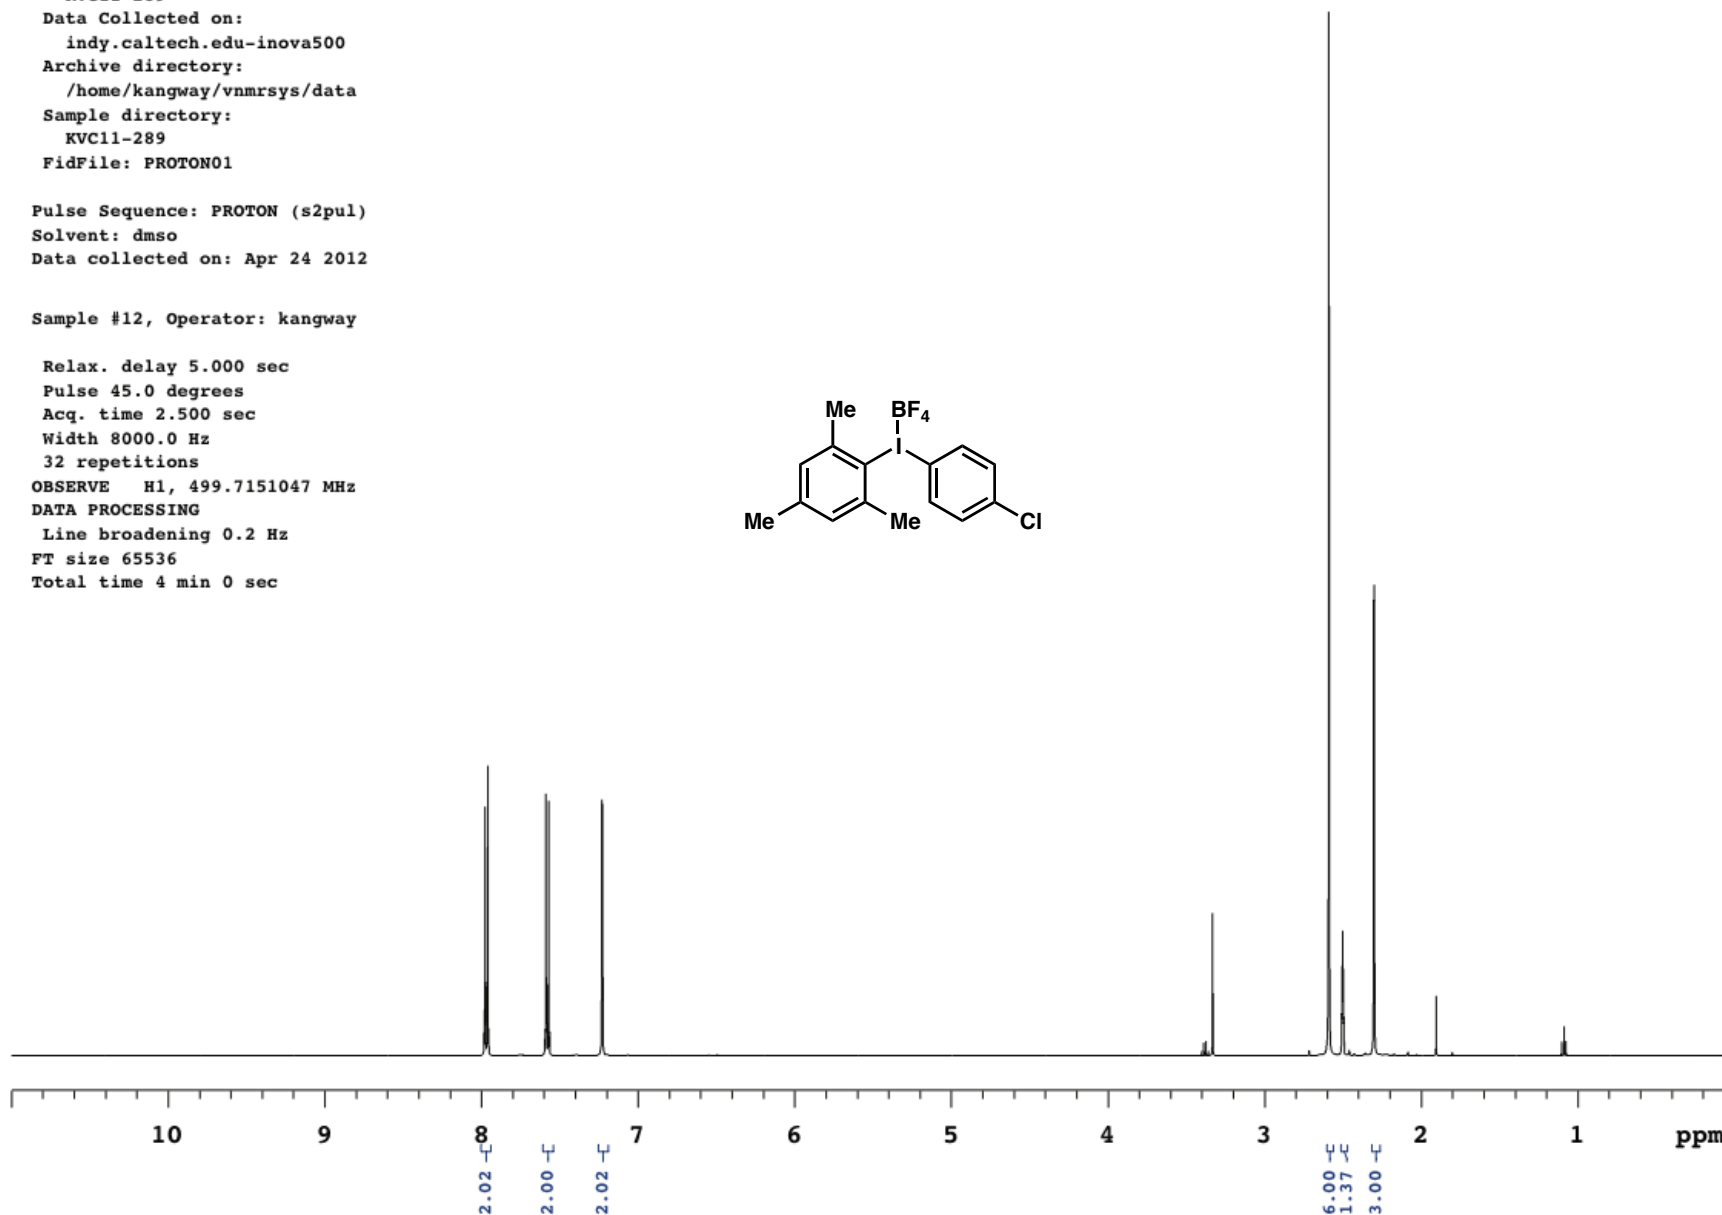



KVC11-289

Sample Name:

KVC11-289

Data Collected on:

indy.caltech.edu-inova500

Archive directory:

/home/kangway/vnmrsys/data

Sample directory:

KVC11-289

FidFile: CARBON01

Pulse Sequence: CARBON (s2pul)

Solvent: dmsd

Data collected on: Apr 24 2012

Sample #12, Operator: kangway

Relax. delay 1.000 sec

Pulse 45.0 degrees

Acq. time 1.042 sec

Width 31446.5 Hz

512 repetitions

OBSERVE C13, 125.6534597 MHz

DECOUPLE H1, 499.7176040 MHz

Power 39 dB

continuously on

WALTZ-16 modulated

DATA PROCESSING

Line broadening 0.5 Hz

FT size 65536

Total time 17 min

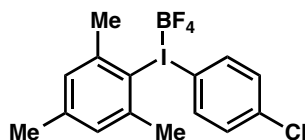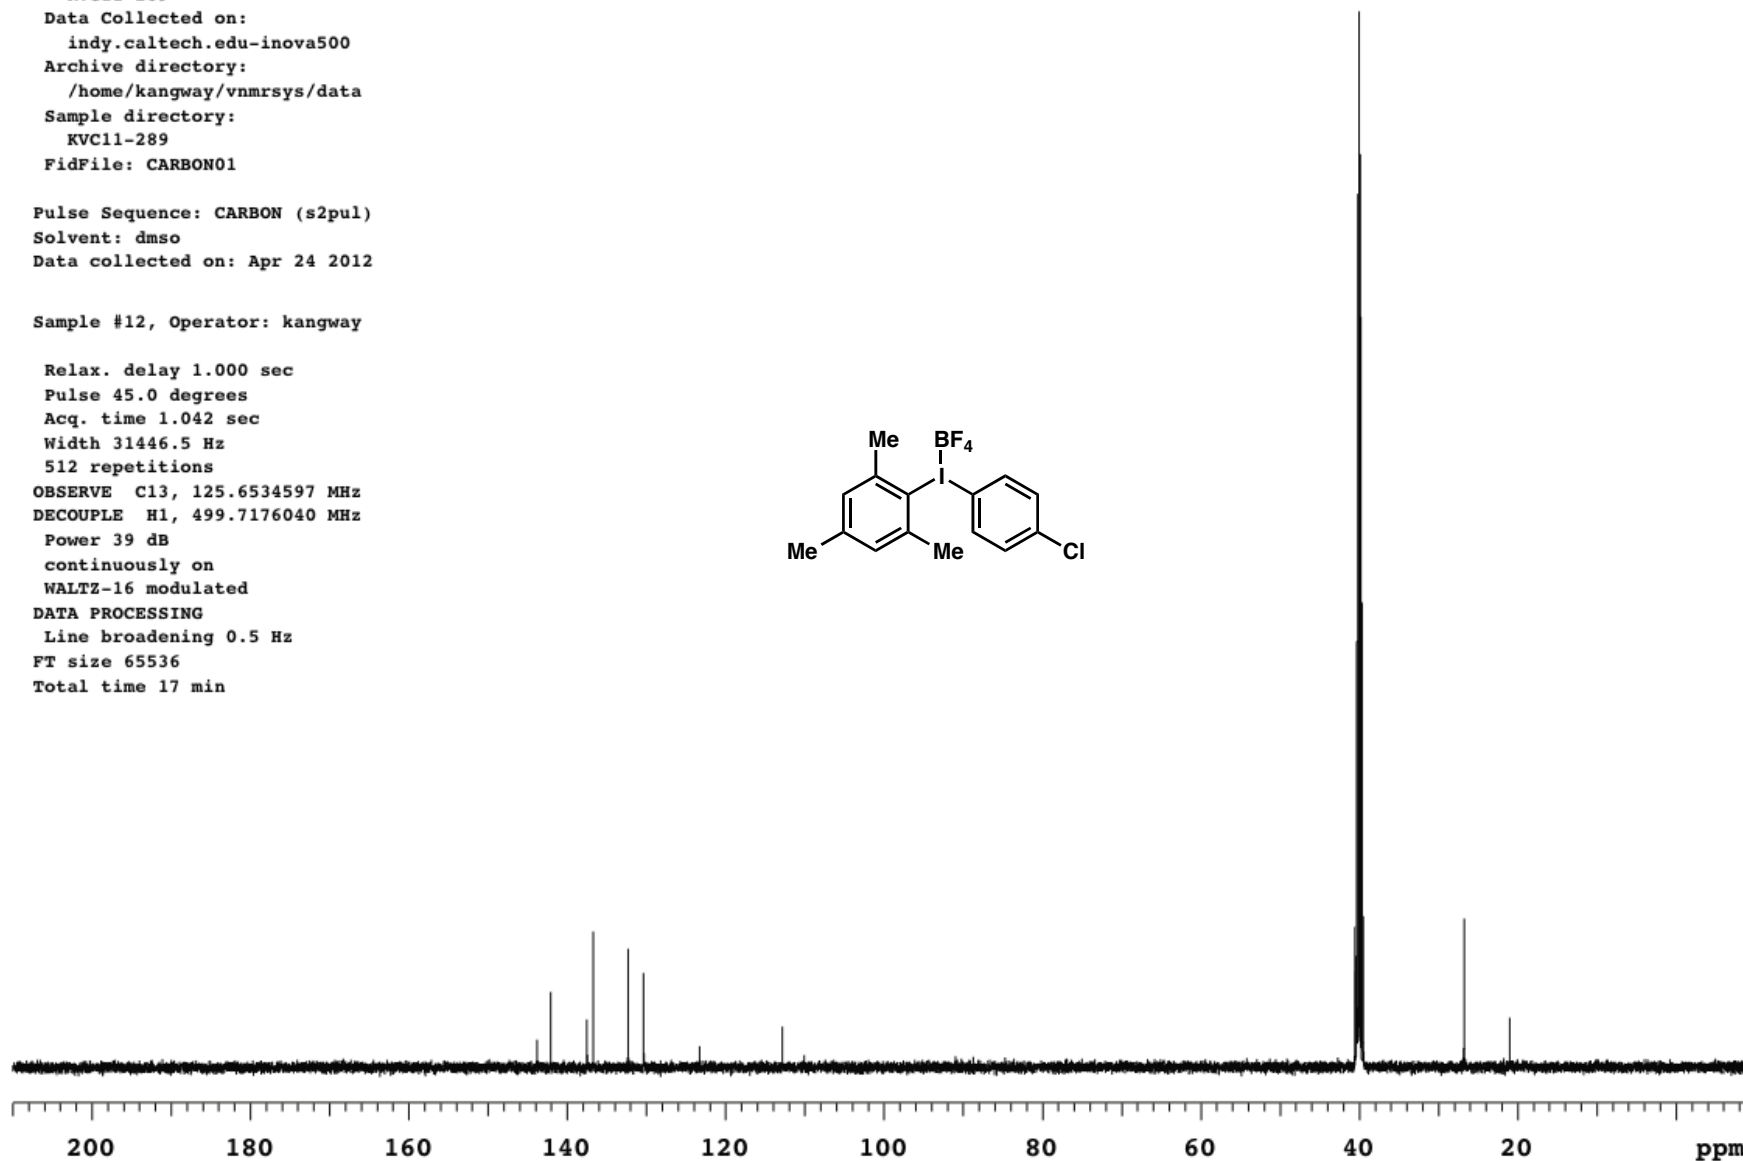

KVC11-287

indy.caltech.edu-inova500

```
/home/kangway/vnmrsys/data
```

KVC11-287

FidFile: PROTON01

Solvent: dmsO

Data collected on: Apr 24 2012

Relax. delay 5.000 sec

Pulse 45.0 degrees

Acq. time 2.500 sec

Width 8000.0 Hz

32 repetitions

OBSERVE H1, 499.7151047 MHz

## DATA PROCESSING

Line broadening 0.2 Hz

FT size 65536

Total time 4 min 0 sec

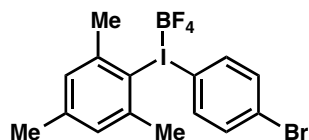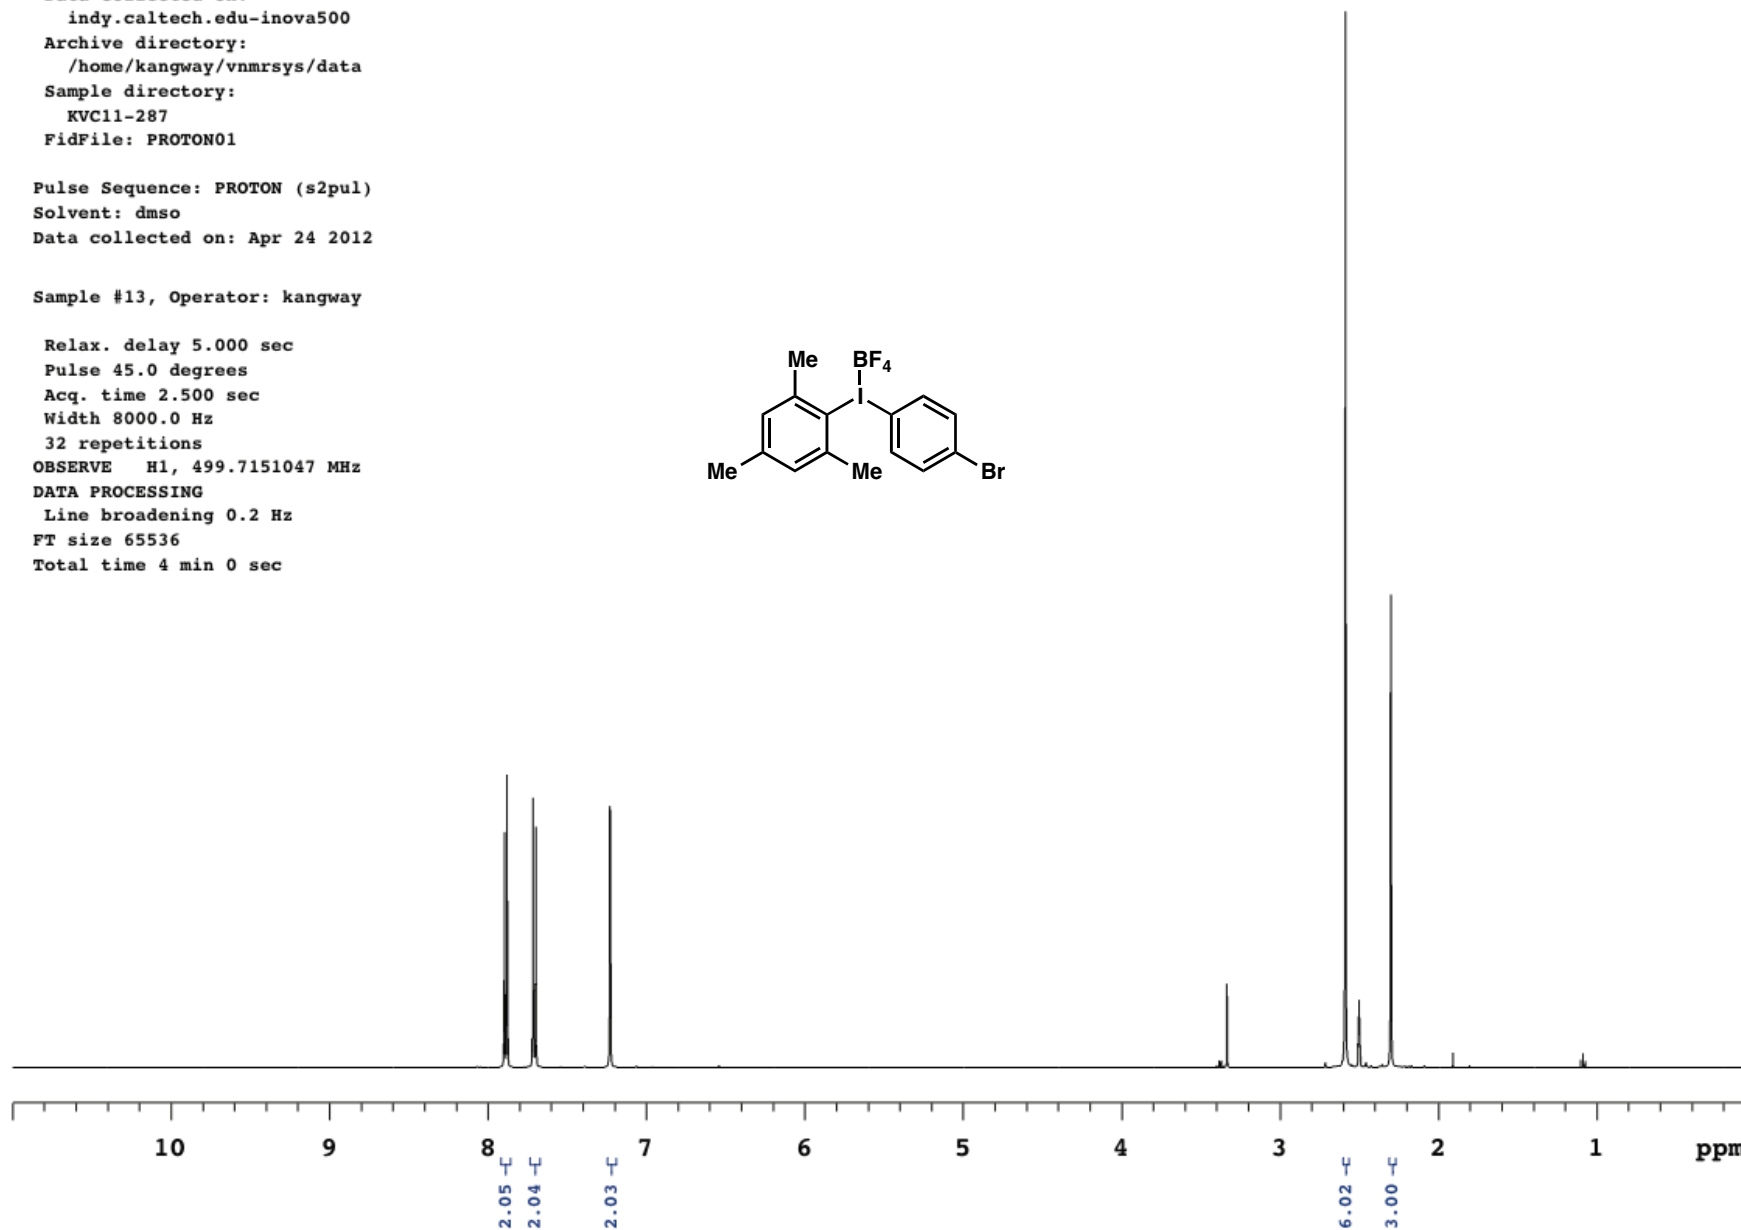

KVC11-287

**Sample Name:**

KVC11-287

**Data Collected on:**

indy.caltech.edu-inova500

Archive directory:

```
/home/kangway/vnmrsys/data
```

Sample directory:

KVC11-287

FidFile: CARBON01

Pulse Sequence: CARBON (s2pul)

Solvent: dmsO

Data collected on: Apr 24 2012

Sample #13, Operator: kangway

Relax. delay 1.000 sec

Pulse 45.0 degrees

Acq. time 1.042 sec

Width 31446.5 Hz

512 repetitions

OBSERVE C13, 125.6534588 MHz

DECOUPLE H1, 499.7176040 MHz

Power 39 dB

continuously on

WALTZ-16 modulated

## DATA PROCESSING

Line broadening 0.5 Hz

FT size 65536

Total time 17 min

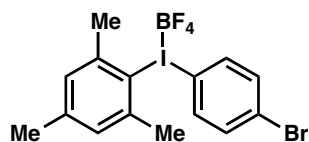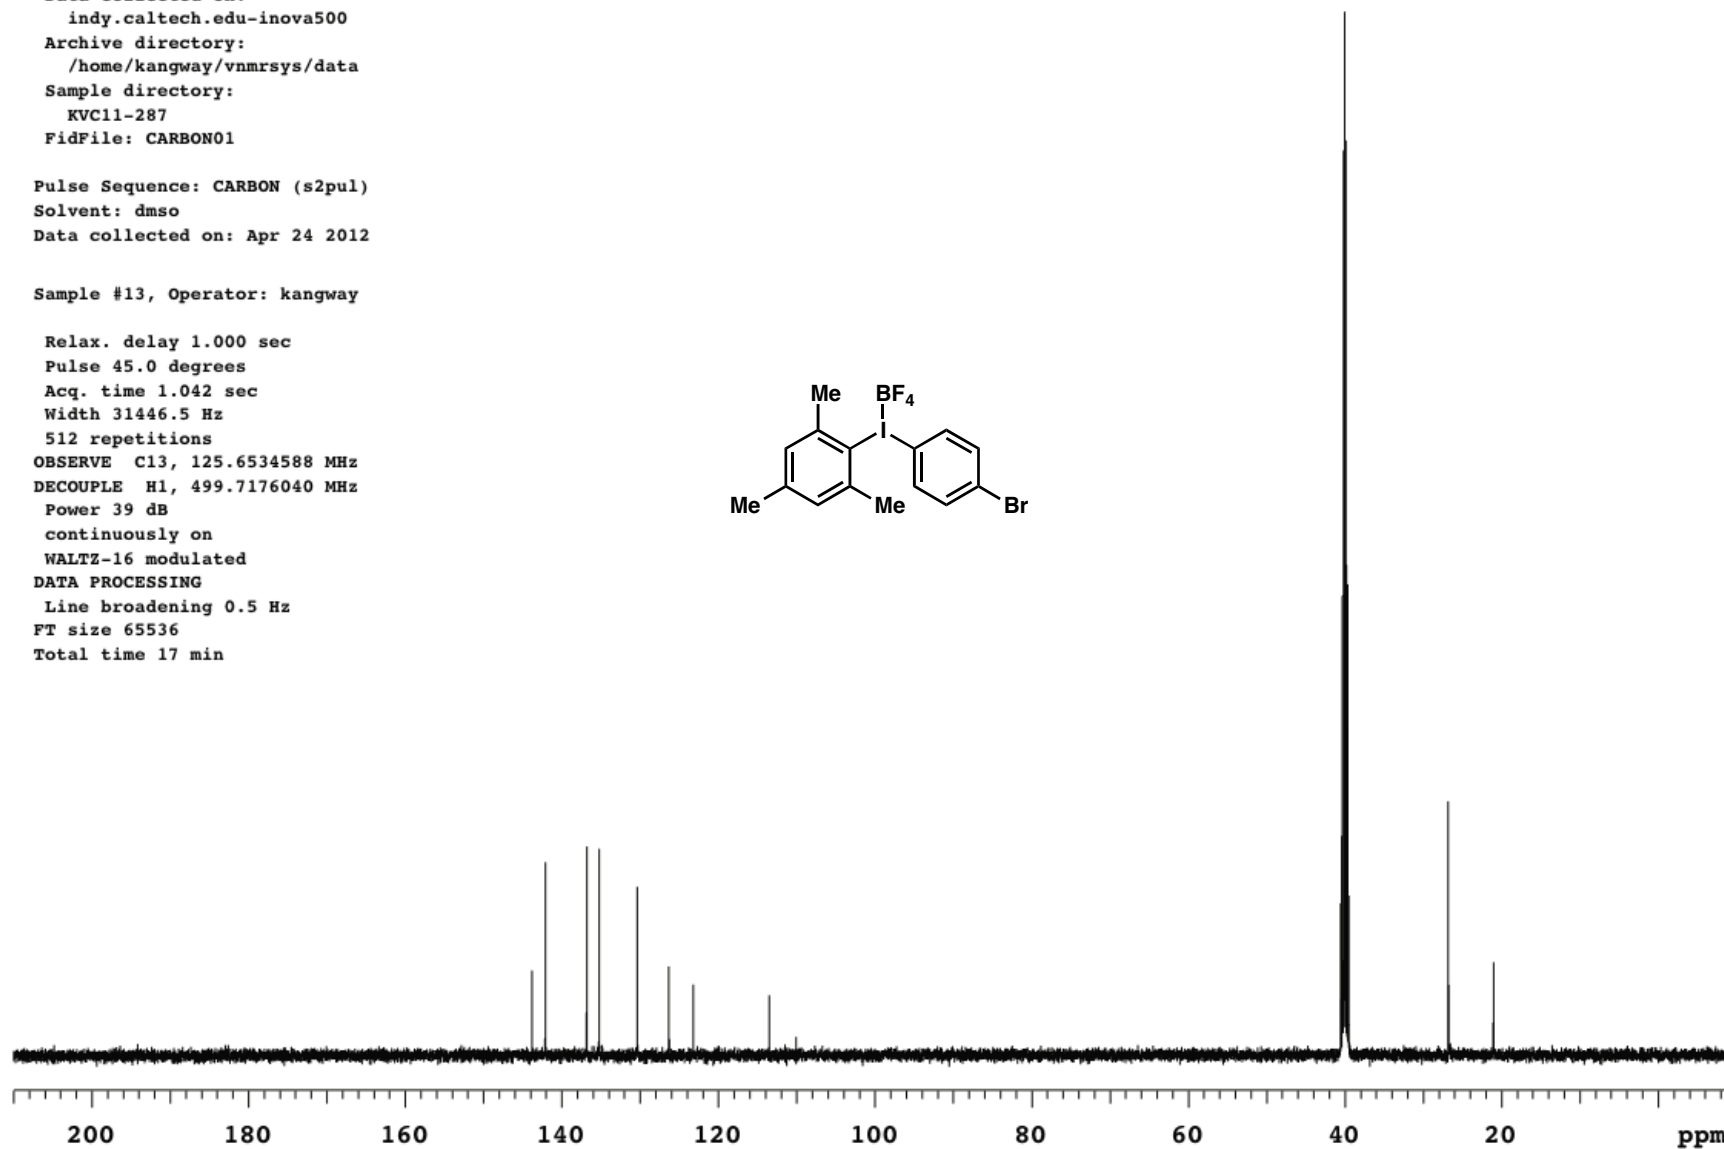

KVC12-109

Sample Name:

KVC12-109

Data Collected on:

indy.caltech.edu-inova500

Archive directory:

/home/kangway/vnmrsys/data

Sample directory:

KVC12-109

FidFile: PROTON02

Pulse Sequence: PROTON (s2pul)

Solvent: dmsd

Data collected on: Apr 24 2012

Sample #45, Operator: kangway

Relax. delay 1.000 sec

Pulse 45.0 degrees

Acq. time 2.500 sec

Width 8000.0 Hz

8 repetitions

OBSERVE H1, 499.7151047 MHz

DATA PROCESSING

Line broadening 0.2 Hz

FT size 65536

Total time 0 min 28 sec

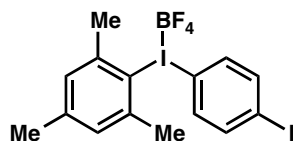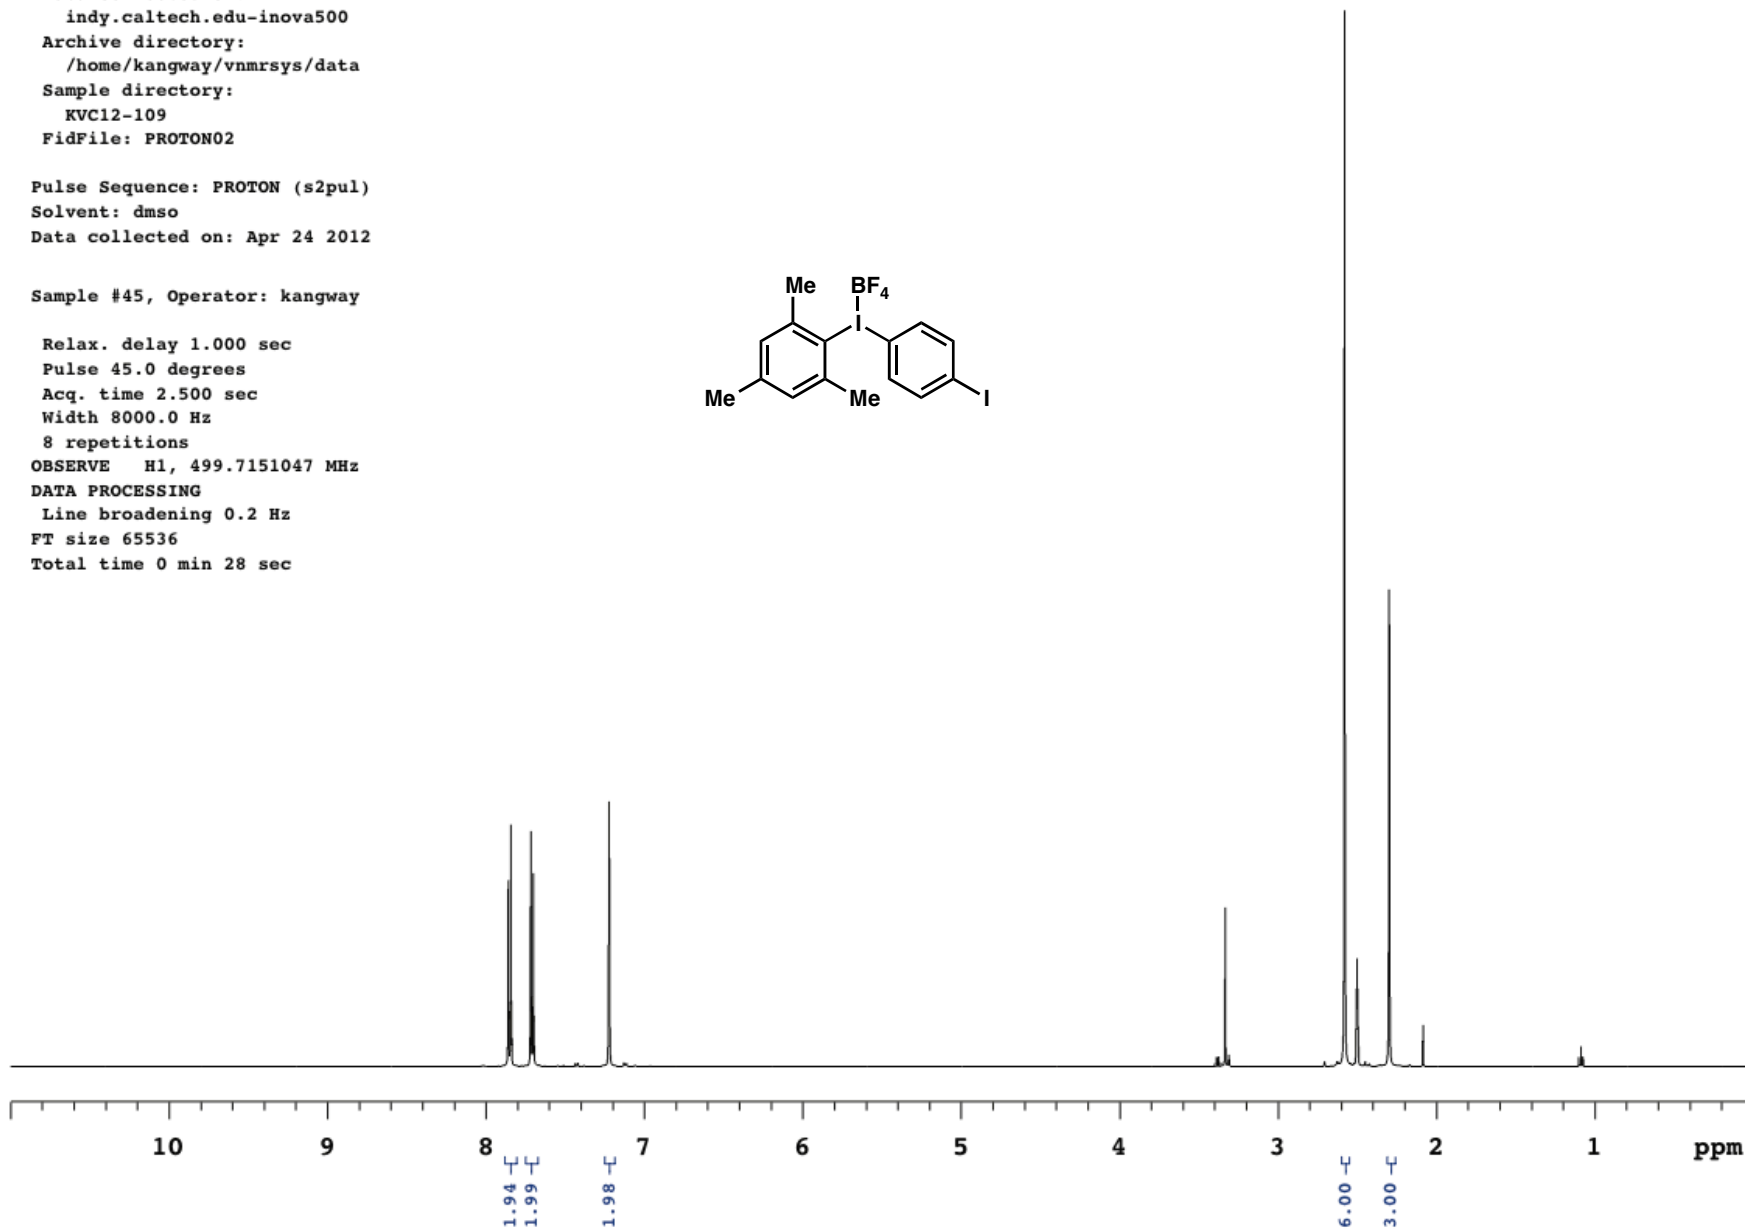

KVC12-109

Sample Name:

KVC12-109

Data Collected on:

indy.caltech.edu-inova500

Archive directory:

/home/kangway/vnmrsys/data

Sample directory:

KVC12-109

FidFile: CARBON02

Pulse Sequence: CARBON (s2pul)

Solvent: dmsd

Data collected on: Apr 24 2012

Sample #45, Operator: kangway

Relax. delay 1.000 sec

Pulse 45.0 degrees

Acq. time 1.042 sec

Width 31446.5 Hz

512 repetitions

OBSERVE C13, 125.6534597 MHz

DECOUPLE H1, 499.7176040 MHz

Power 39 dB

continuously on

WALTZ-16 modulated

DATA PROCESSING

Line broadening 0.5 Hz

FT size 65536

Total time 17 min

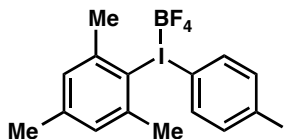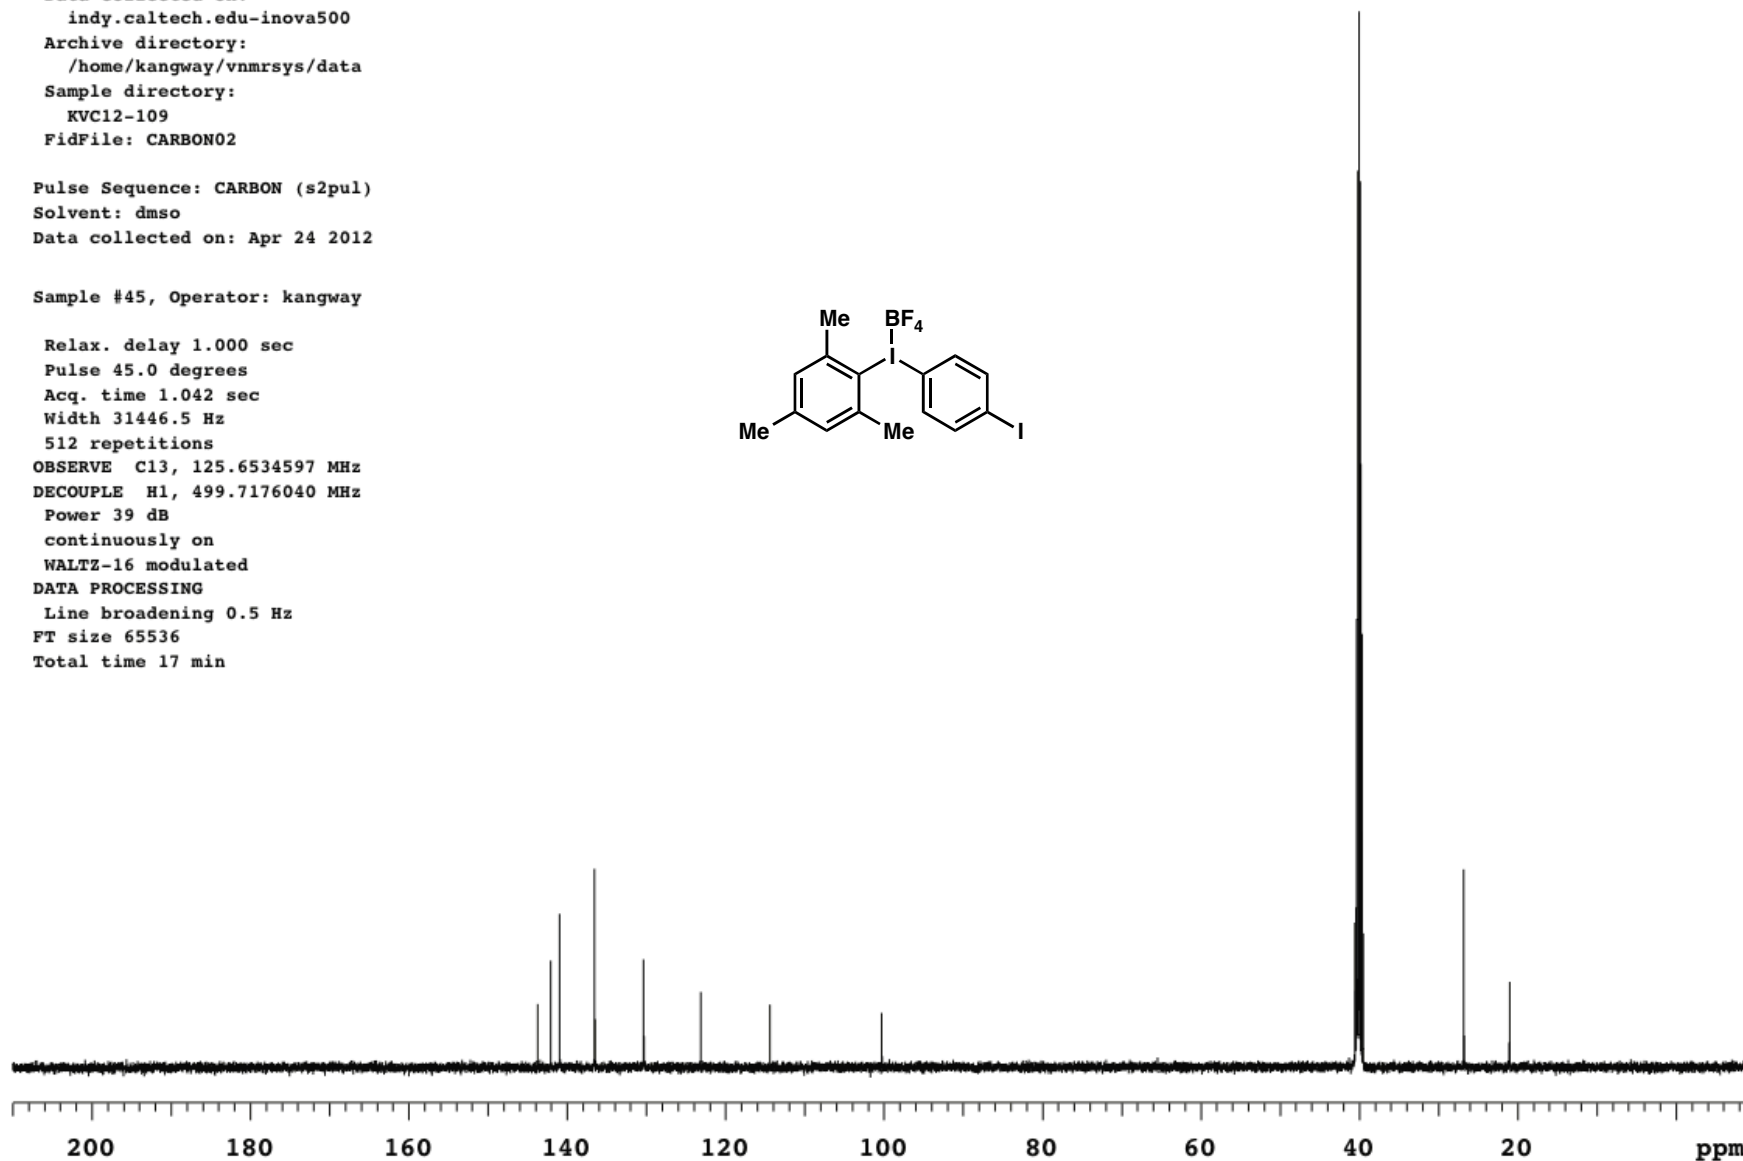

KVC11-253

Sample Name:

KVC11-253

Data Collected on:

indy.caltech.edu-inova500

Archive directory:

/home/kangway/vnmrsys/data

Sample directory:

KVC11-253

FidFile: PROTON01

Pulse Sequence: PROTON (s2pul)

Solvent: dmsd

Data collected on: Apr 24 2012

Sample #11, Operator: kangway

Relax. delay 5.000 sec

Pulse 45.0 degrees

Acq. time 2.500 sec

Width 8000.0 Hz

32 repetitions

OBSERVE H1, 499.7151047 MHz

DATA PROCESSING

Line broadening 0.2 Hz

FT size 65536

Total time 4 min 0 sec

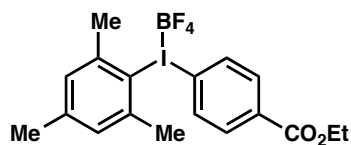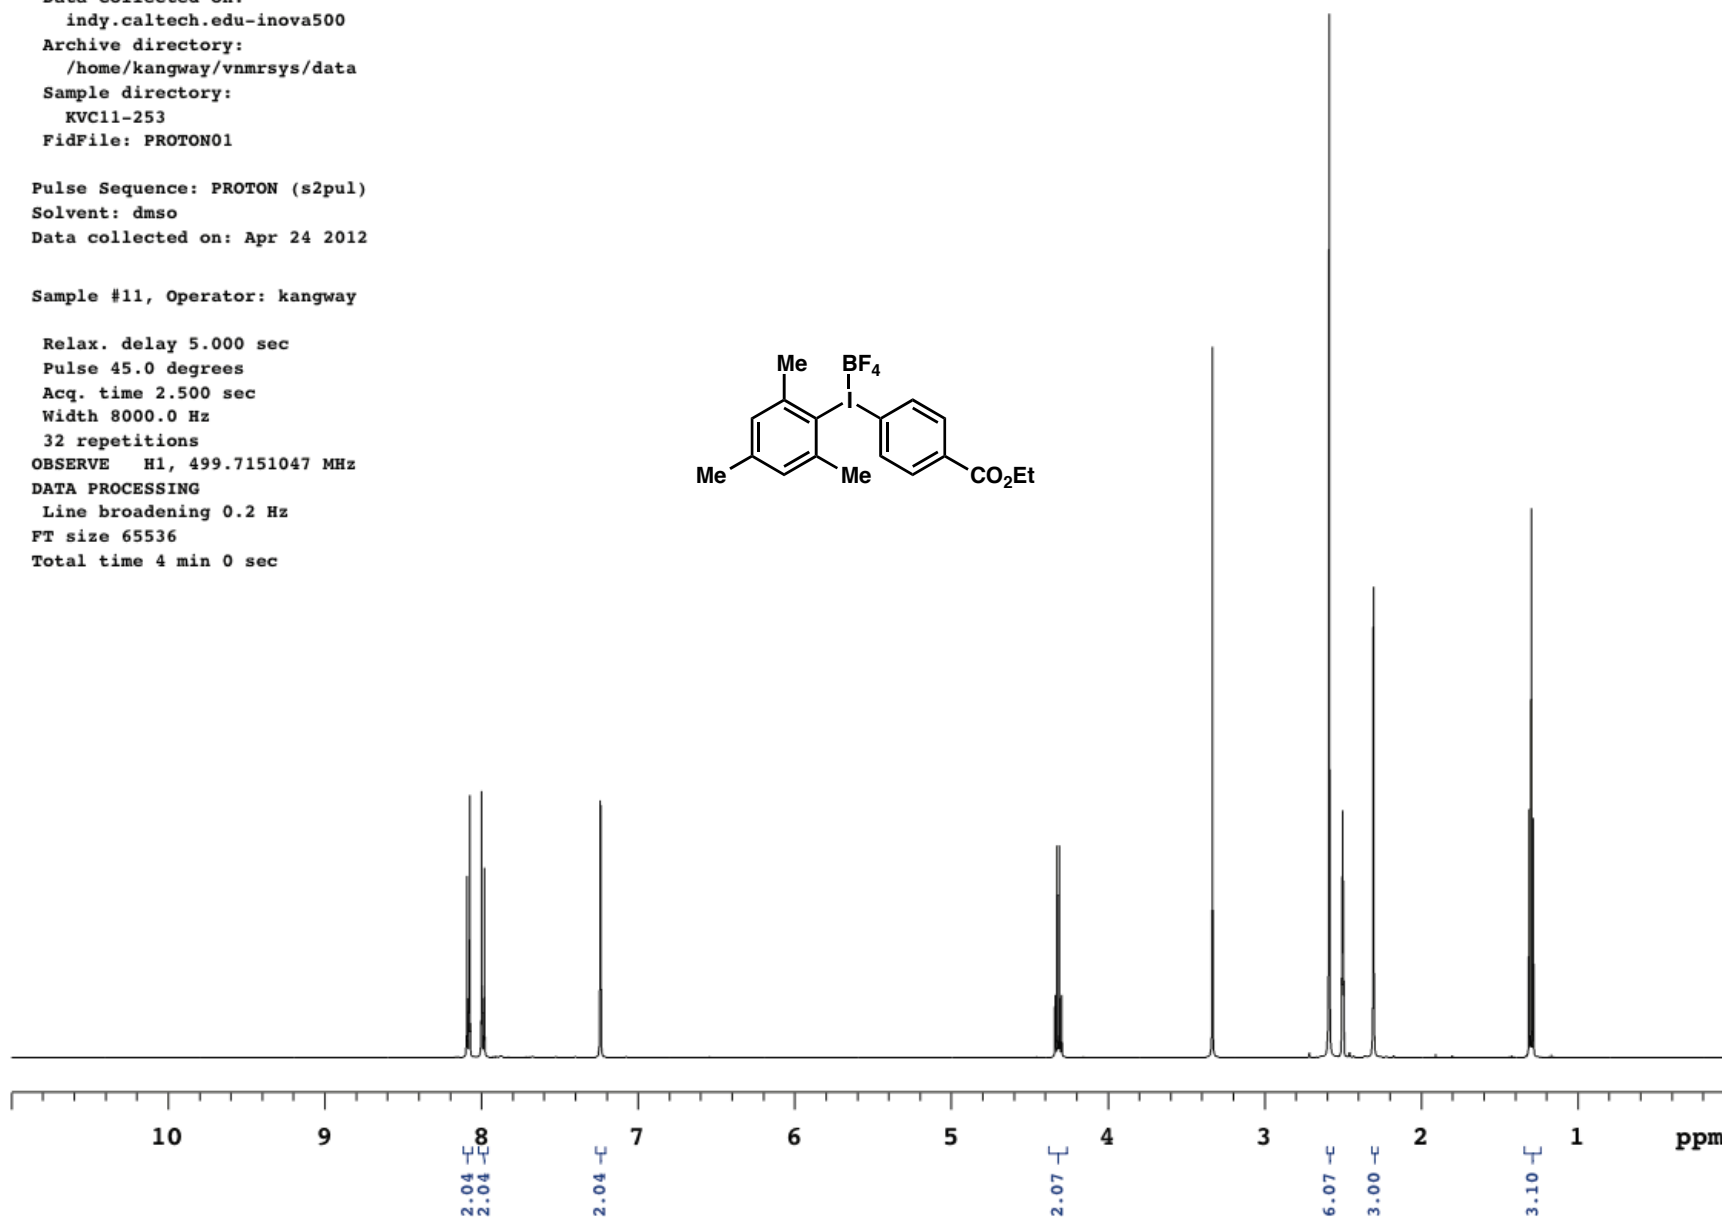

KVC11-253

Sample Name:

KVC11-253

Data Collected on:

indy.caltech.edu-inova500

Archive directory:

/home/kangway/vnmrsys/data

Sample directory:

KVC11-253

FidFile: CARBON01

Pulse Sequence: CARBON (s2pul)

Solvent: dmsd

Data collected on: Apr 24 2012

Sample #11, Operator: kangway

Relax. delay 1.000 sec

Pulse 45.0 degrees

Acq. time 1.042 sec

Width 31446.5 Hz

512 repetitions

OBSERVE C13, 125.6534597 MHz

DECOUPLE H1, 499.7176040 MHz

Power 39 dB

continuously on

WALTZ-16 modulated

DATA PROCESSING

Line broadening 0.5 Hz

FT size 65536

Total time 17 min

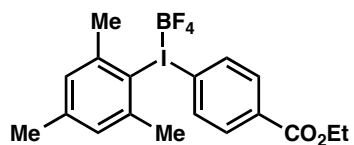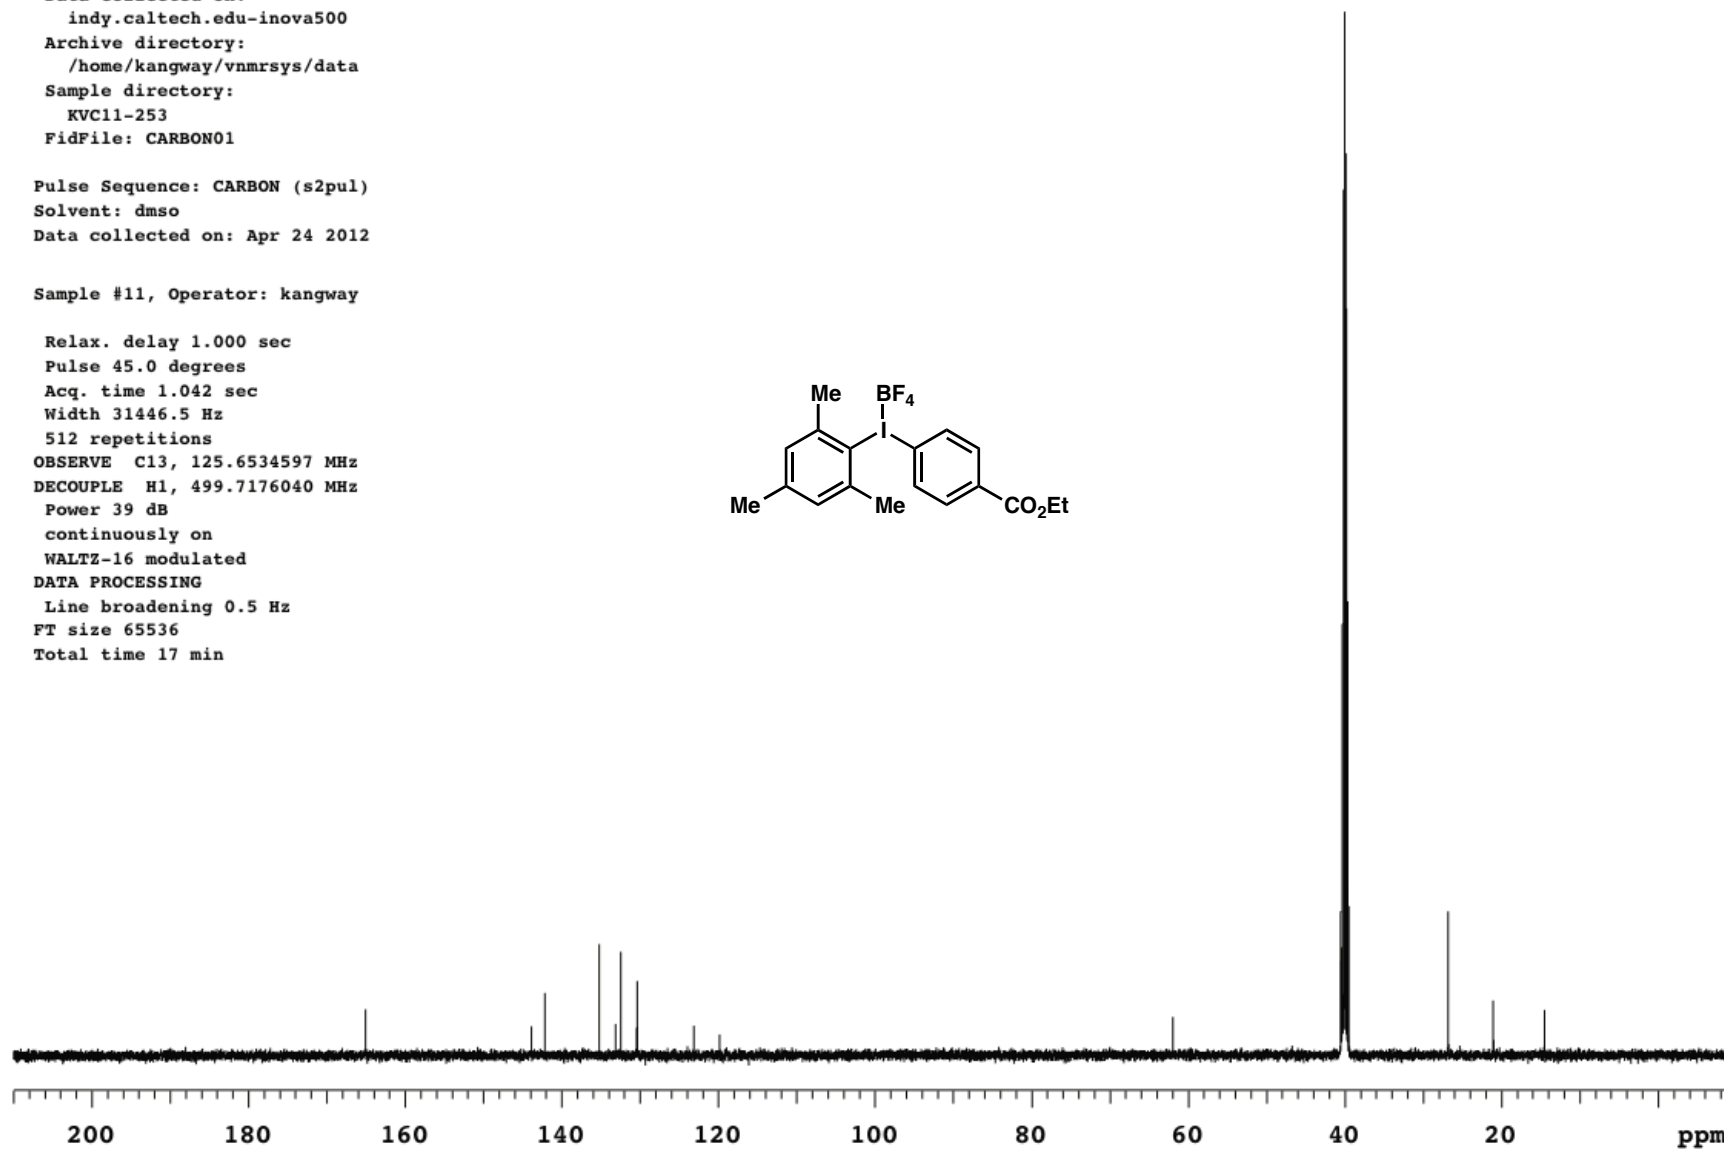

Sample Name:  
KVC11-229  
Data Collected on:  
indy.caltech.edu-inova500  
Archive directory:  
/home/mkieffer/vnmrsys/data  
Sample directory:  
KVC11-229  
FidFile: PROTON02

Pulse Sequence: PROTON (s2pul)  
Solvent: cdcl3  
Data collected on: Jun 12 2012

Sample #42, Operator: mkieffer

Relax. delay 5.000 sec  
Pulse 45.0 degrees  
Acq. time 2.500 sec  
Width 8000.0 Hz  
32 repetitions  
OBSERVE H1, 499.7127412 MHz  
DATA PROCESSING  
Line broadening 0.2 Hz  
FT size 65536  
Total time 4 min 0 sec

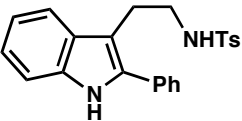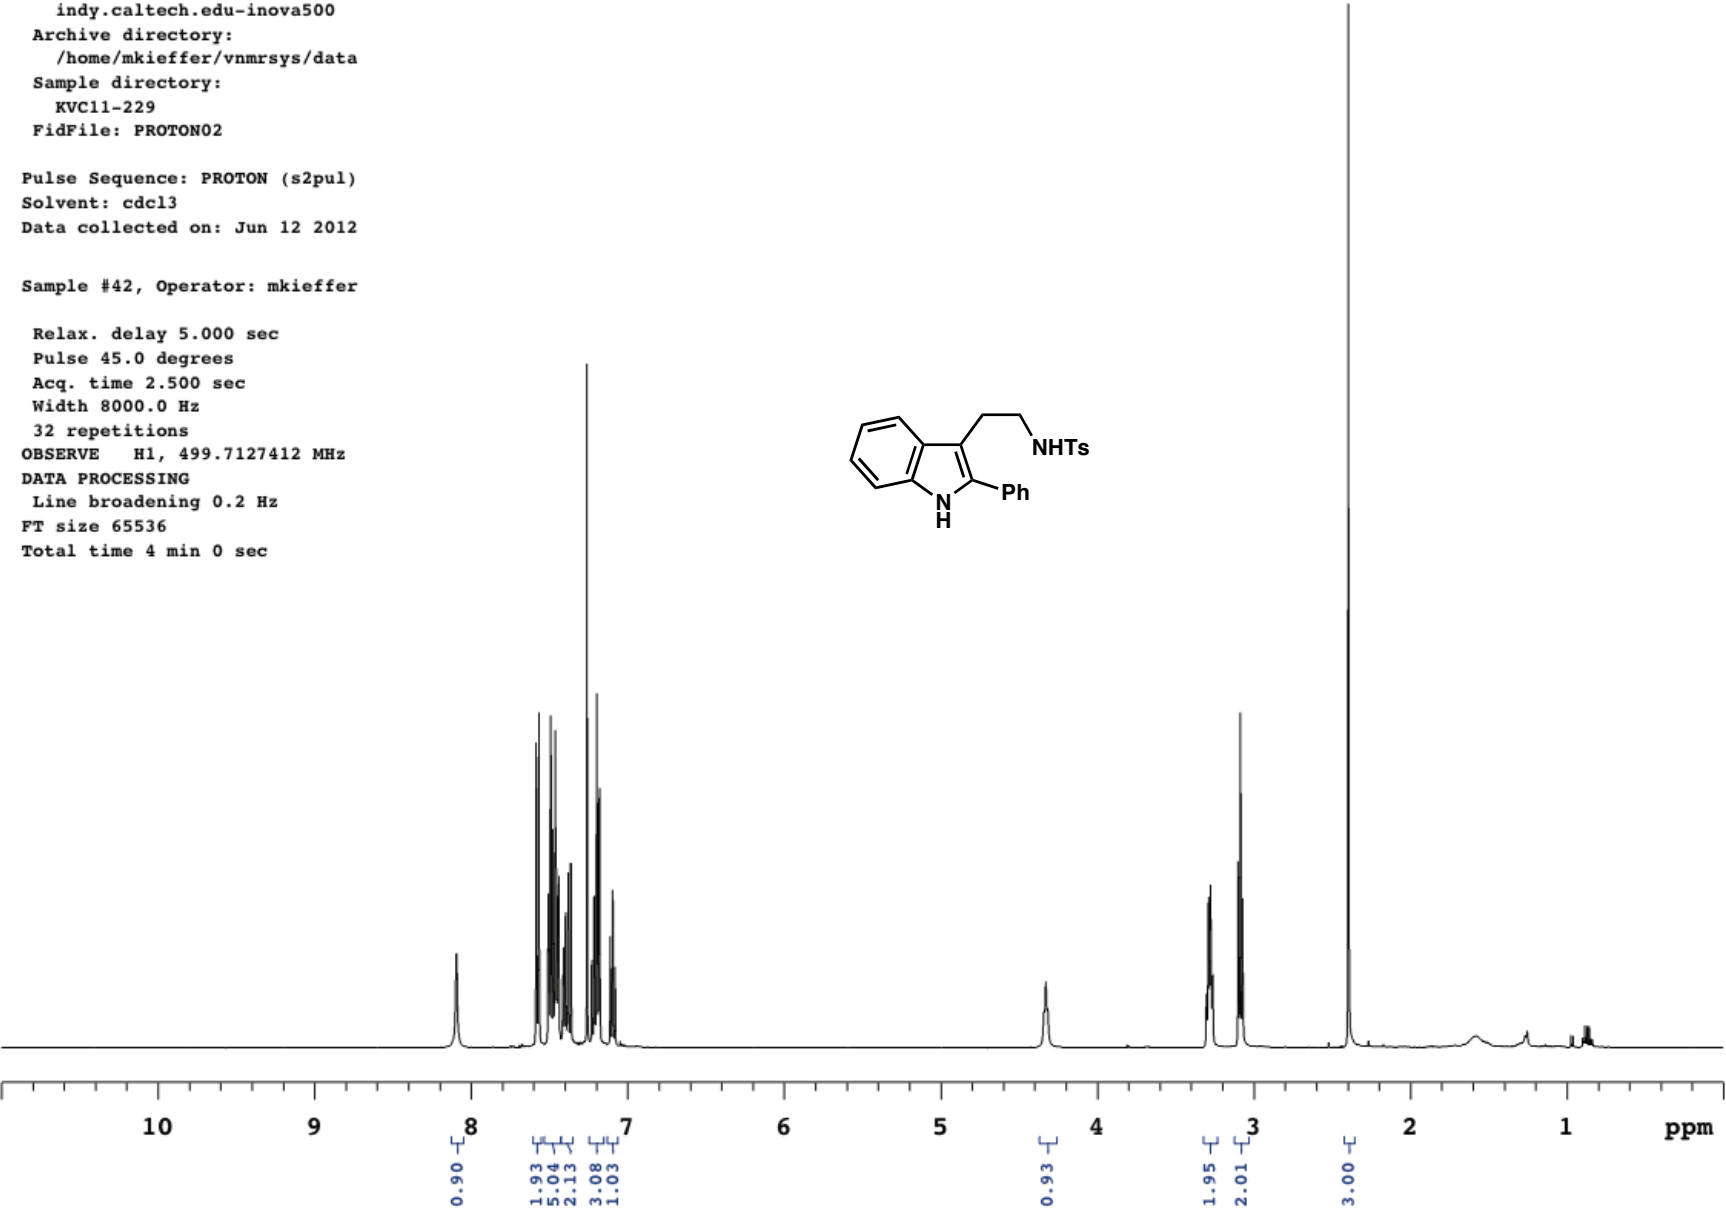



Sample Name:  
KVC11-229  
Data Collected on:  
indy.caltech.edu-inova500  
Archive directory:  
/home/mkieffer/vnmrsys/data  
Sample directory:  
KVC11-229  
FidFile: CARBON01

Pulse Sequence: CARBON (s2pul)  
Solvent: cdcl3  
Data collected on: Jun 12 2012

Sample #42, Operator: mkieffer

Relax. delay 1.000 sec  
Pulse 45.0 degrees  
Acq. time 1.042 sec  
Width 31446.5 Hz  
512 repetitions  
OBSERVE C13, 125.6528700 MHz  
DECOUPLE H1, 499.7152303 MHz  
Power 39 dB  
continuously on  
WALTZ-16 modulated  
DATA PROCESSING  
Line broadening 0.5 Hz  
FT size 65536  
Total time 17 min

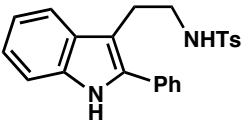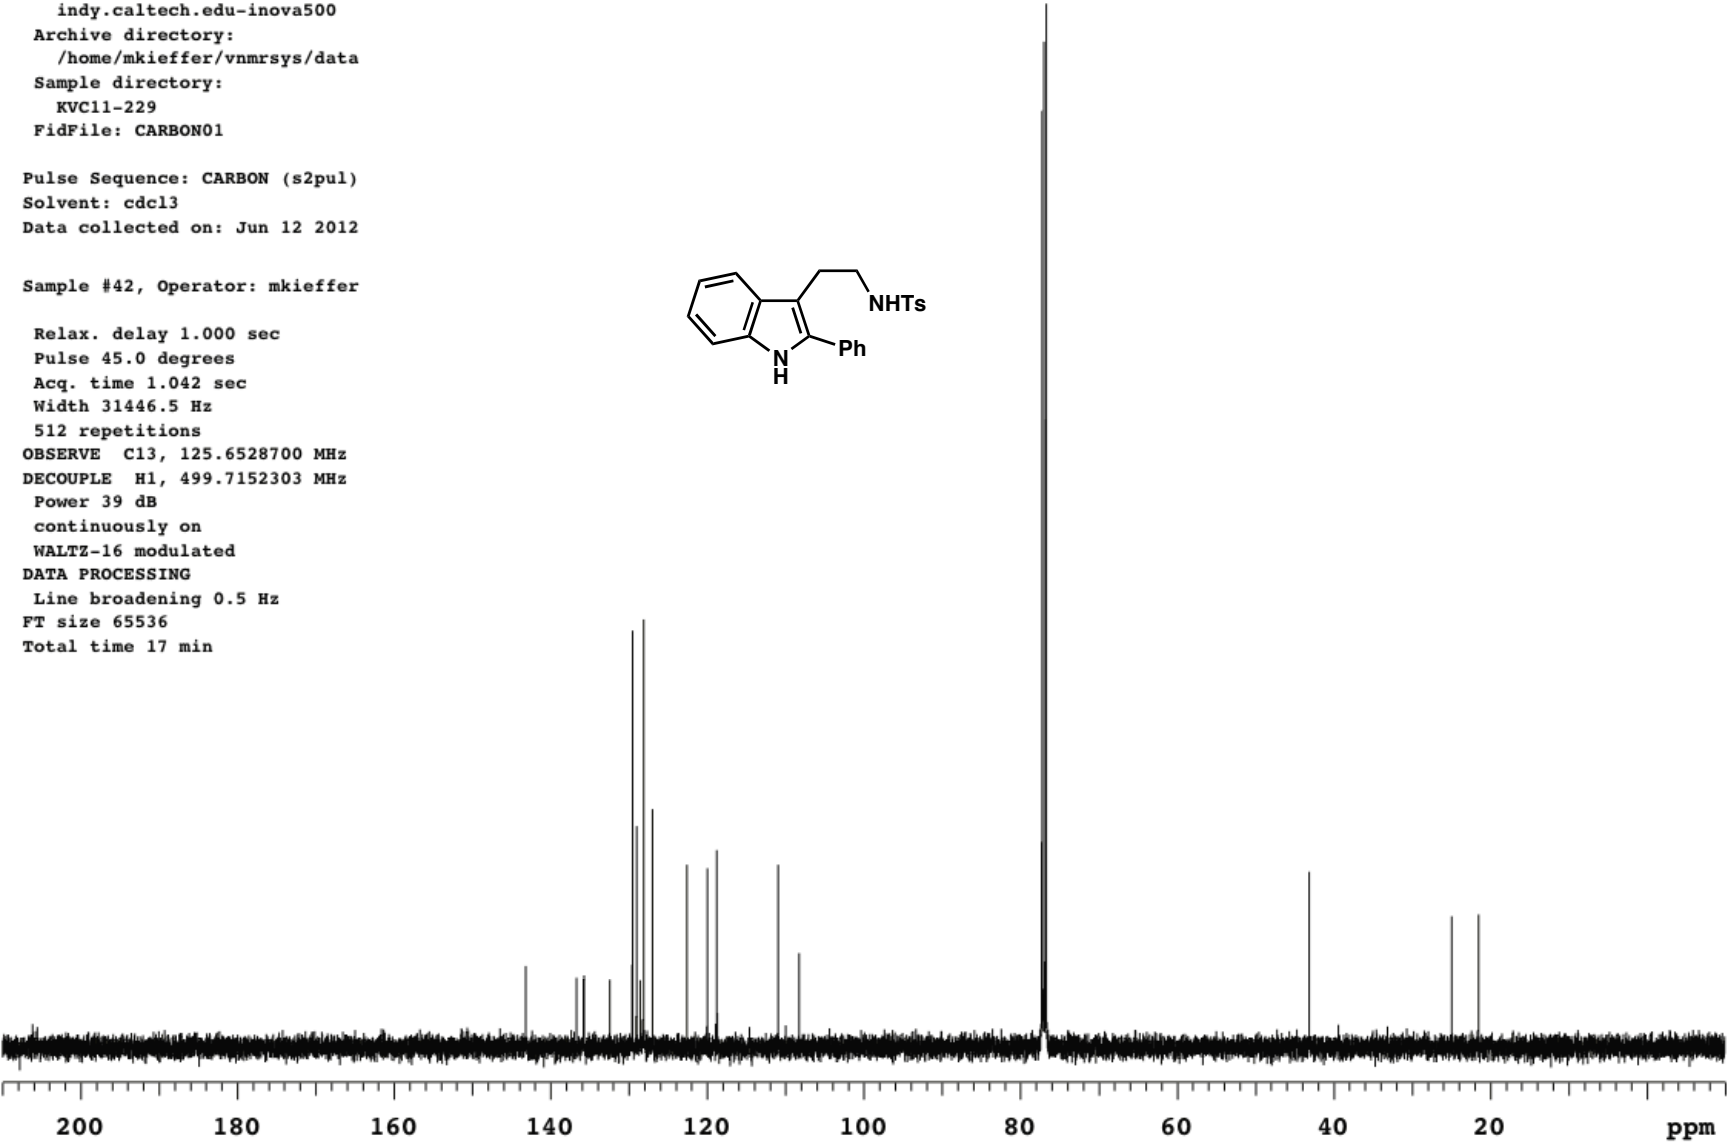

Sample Name:  
MEK4135-A  
Data Collected on:  
indy.caltech.edu-inova500  
Archive directory:  
/home/mkieffer/vnmrsys/data  
Sample directory:  
MEK4135-A  
FidFile: PROTON01

Pulse Sequence: PROTON (s2pul)  
Solvent: cdcl3  
Data collected on: Jun 12 2012

Sample #41, Operator: mkieffer

Relax. delay 5.000 sec  
Pulse 45.0 degrees  
Acq. time 2.500 sec  
Width 8000.0 Hz  
32 repetitions  
OBSERVE H1, 499.7127408 MHz  
DATA PROCESSING  
Line broadening 0.2 Hz  
FT size 65536  
Total time 4 min 0 sec

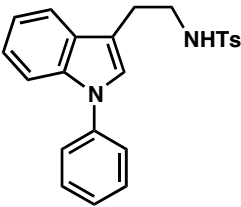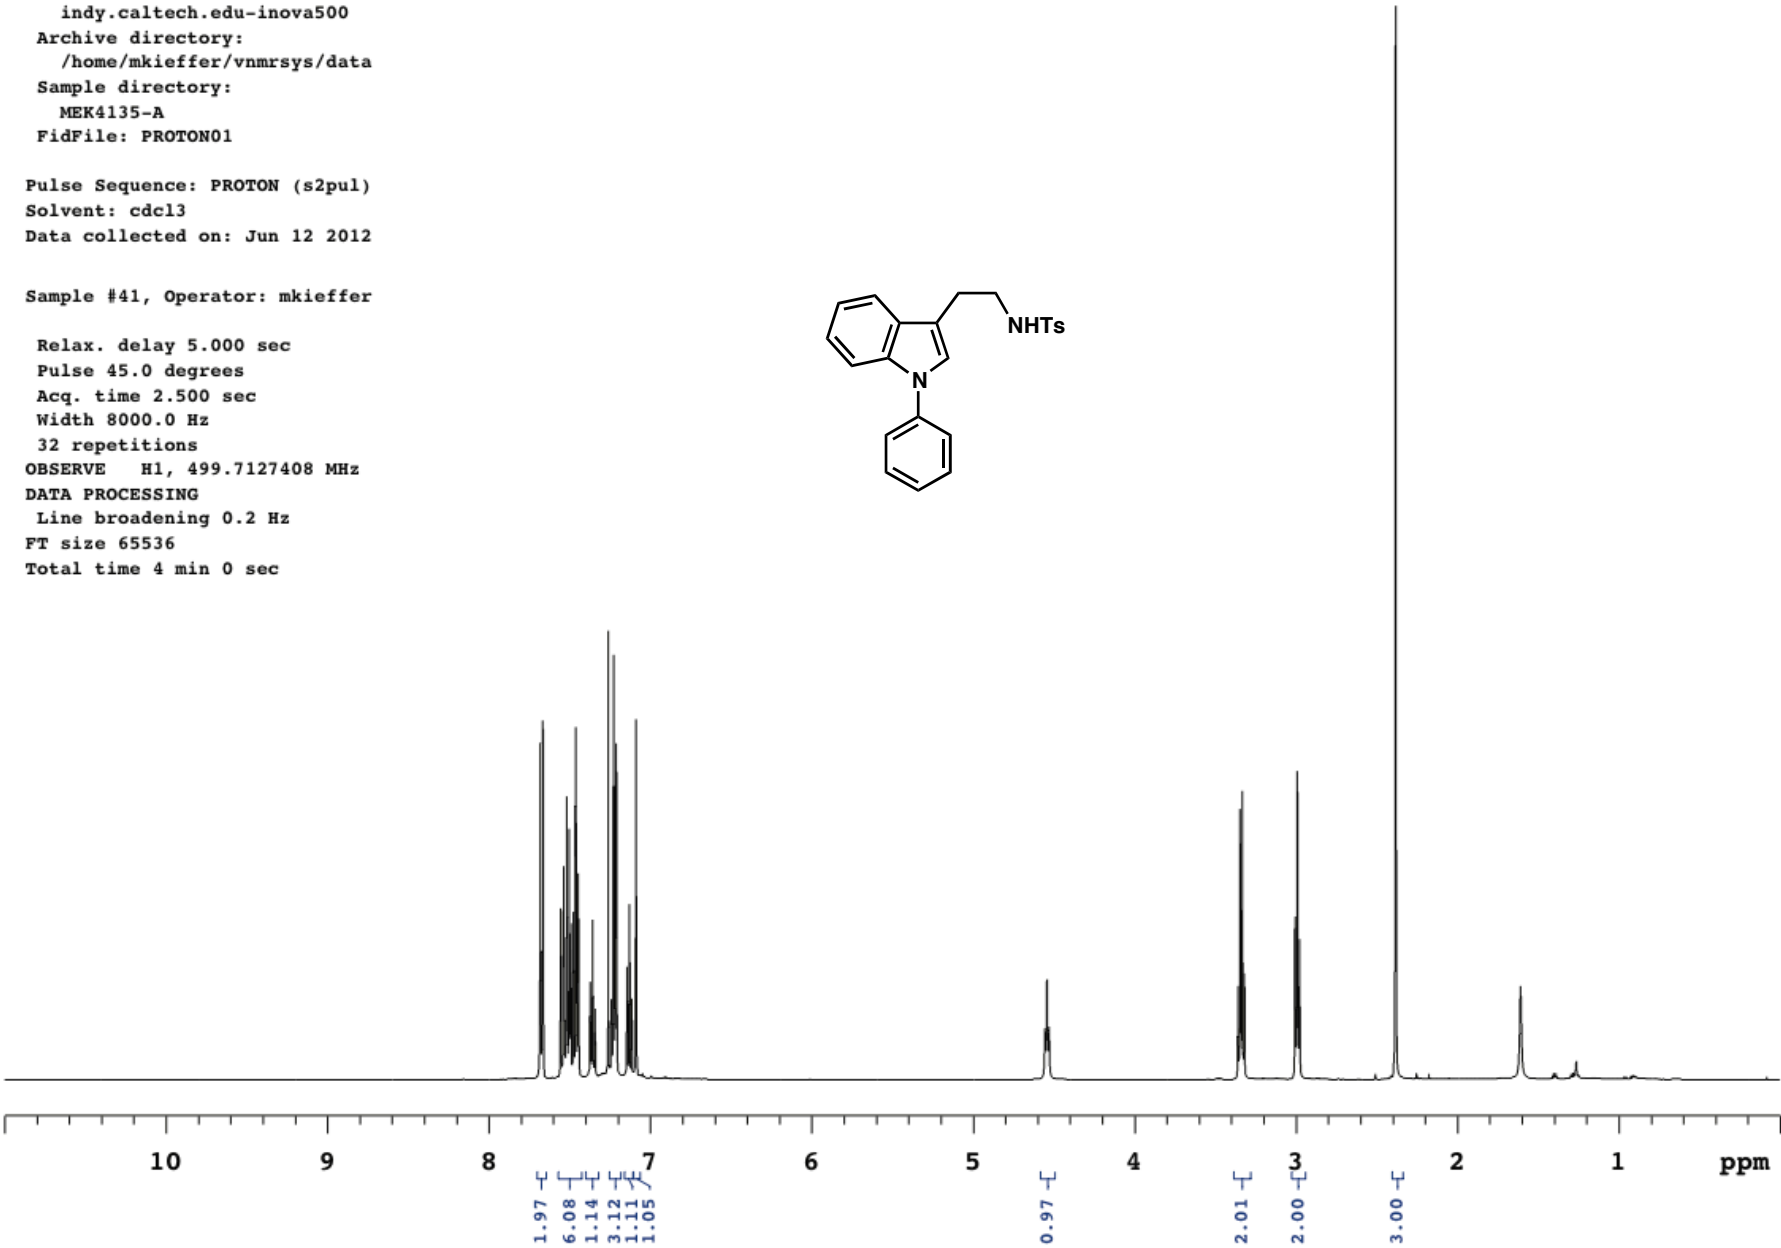

Sample Name:  
MEK4135-A  
Data Collected on:  
indy.caltech.edu-inova500  
Archive directory:  
/home/mkieffer/vnmrsys/data  
Sample directory:  
MEK4135-A  
FidFile: CARBON01

Pulse Sequence: CARBON (s2pul)  
Solvent: cdcl3  
Data collected on: Jun 12 2012

Sample #41, Operator: mkieffer

Relax. delay 1.000 sec  
Pulse 45.0 degrees  
Acq. time 1.042 sec  
Width 31446.5 Hz  
512 repetitions  
OBSERVE C13, 125.6528729 MHz  
DECOUPLE H1, 499.7152303 MHz  
Power 39 dB  
continuously on  
WALTZ-16 modulated  
DATA PROCESSING  
Line broadening 0.5 Hz  
FT size 65536  
Total time 17 min

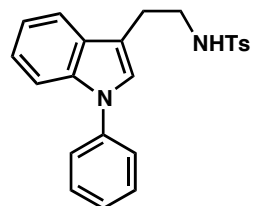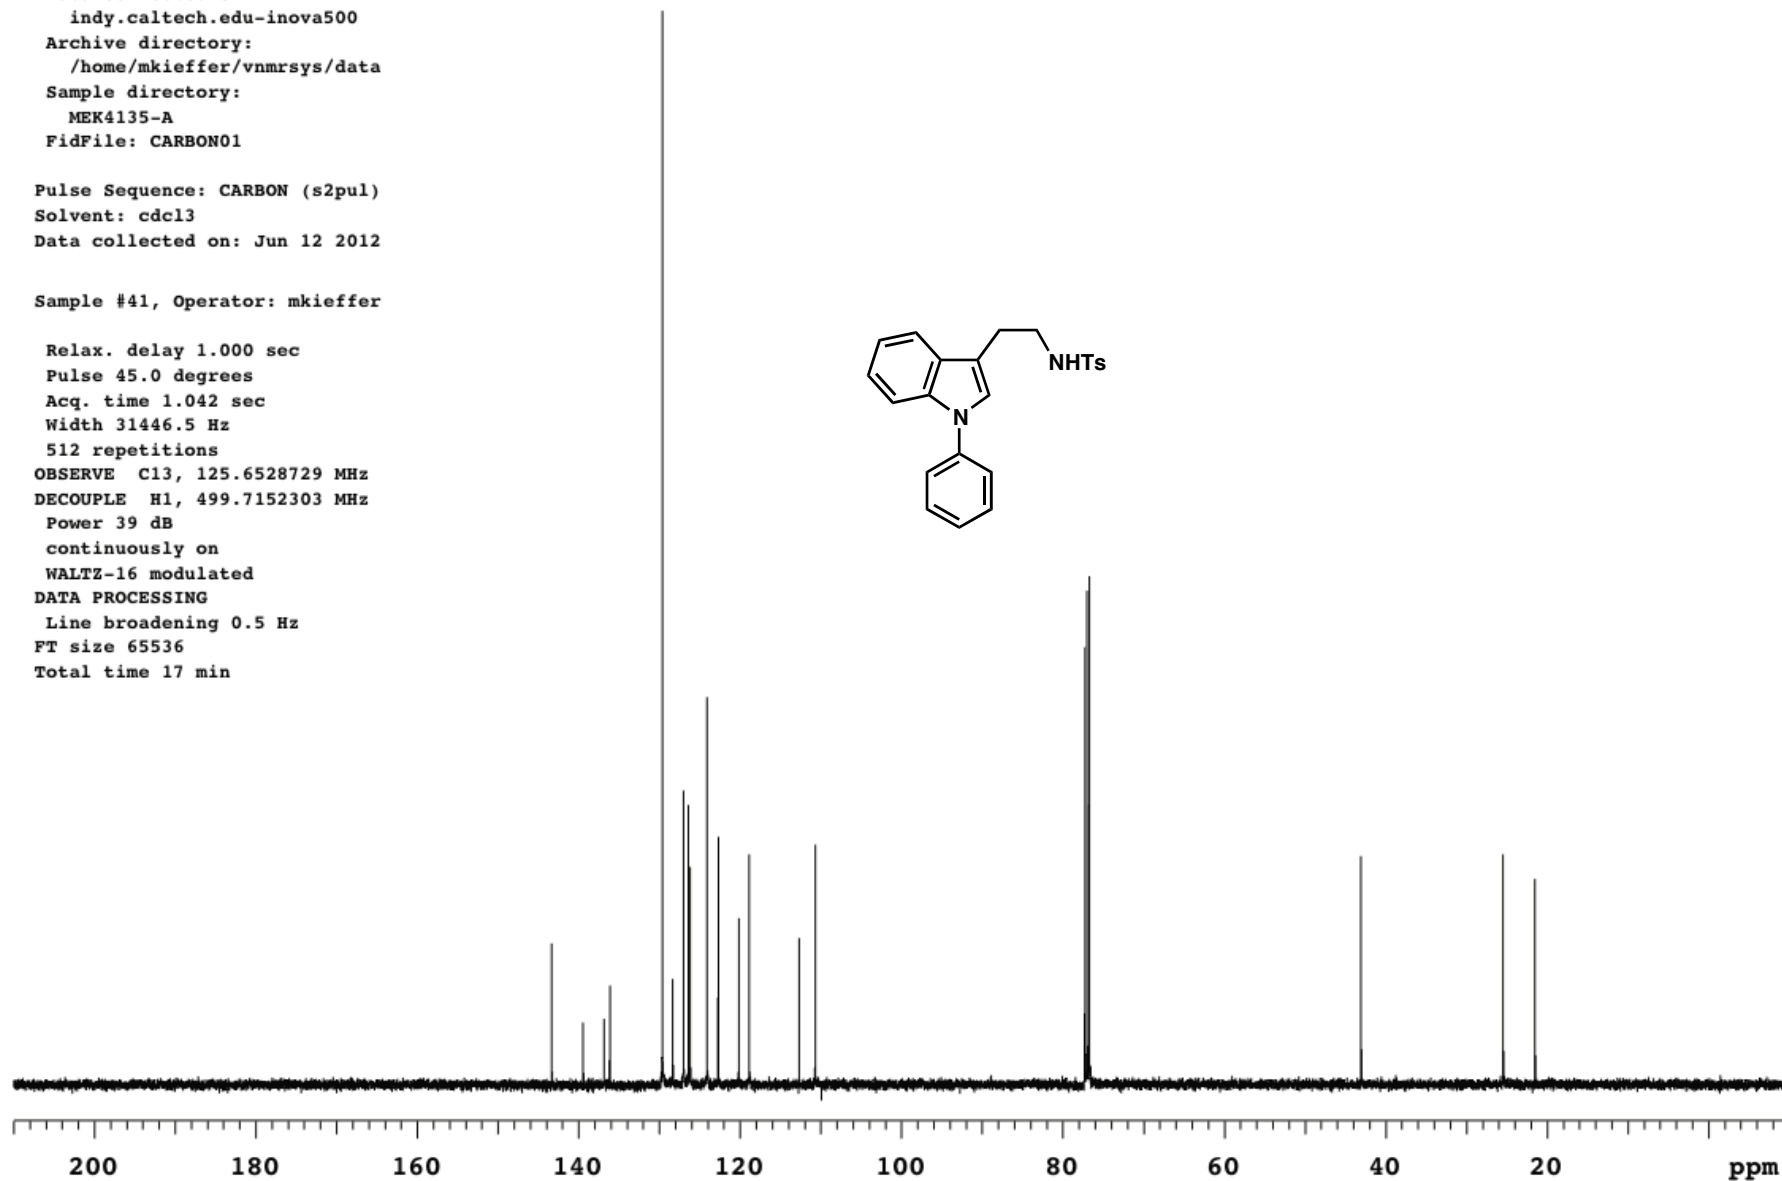

MEK3301-6

Sample Name:  
MEK3301-6  
Data Collected on:  
indy.caltech.edu-inova500  
Archive directory:  
/home/mkieffer/vnmrsys/data  
Sample directory:  
MEK3301-6  
FidFile: PROTON01

Pulse Sequence: PROTON (s2pul)  
Solvent: cdcl3  
Data collected on: Oct 25 2011

Sample #14, Operator: mkieffer

Relax. delay 2.000 sec  
Pulse 45.0 degrees  
Acq. time 2.500 sec  
Width 8000.0 Hz  
16 repetitions  
OBSERVE H1, 499.7225125 MHz  
DATA PROCESSING  
Line broadening 0.2 Hz  
FT size 65536  
Total time 1 min 12 sec

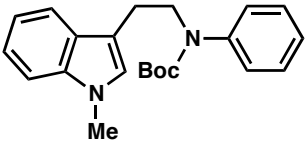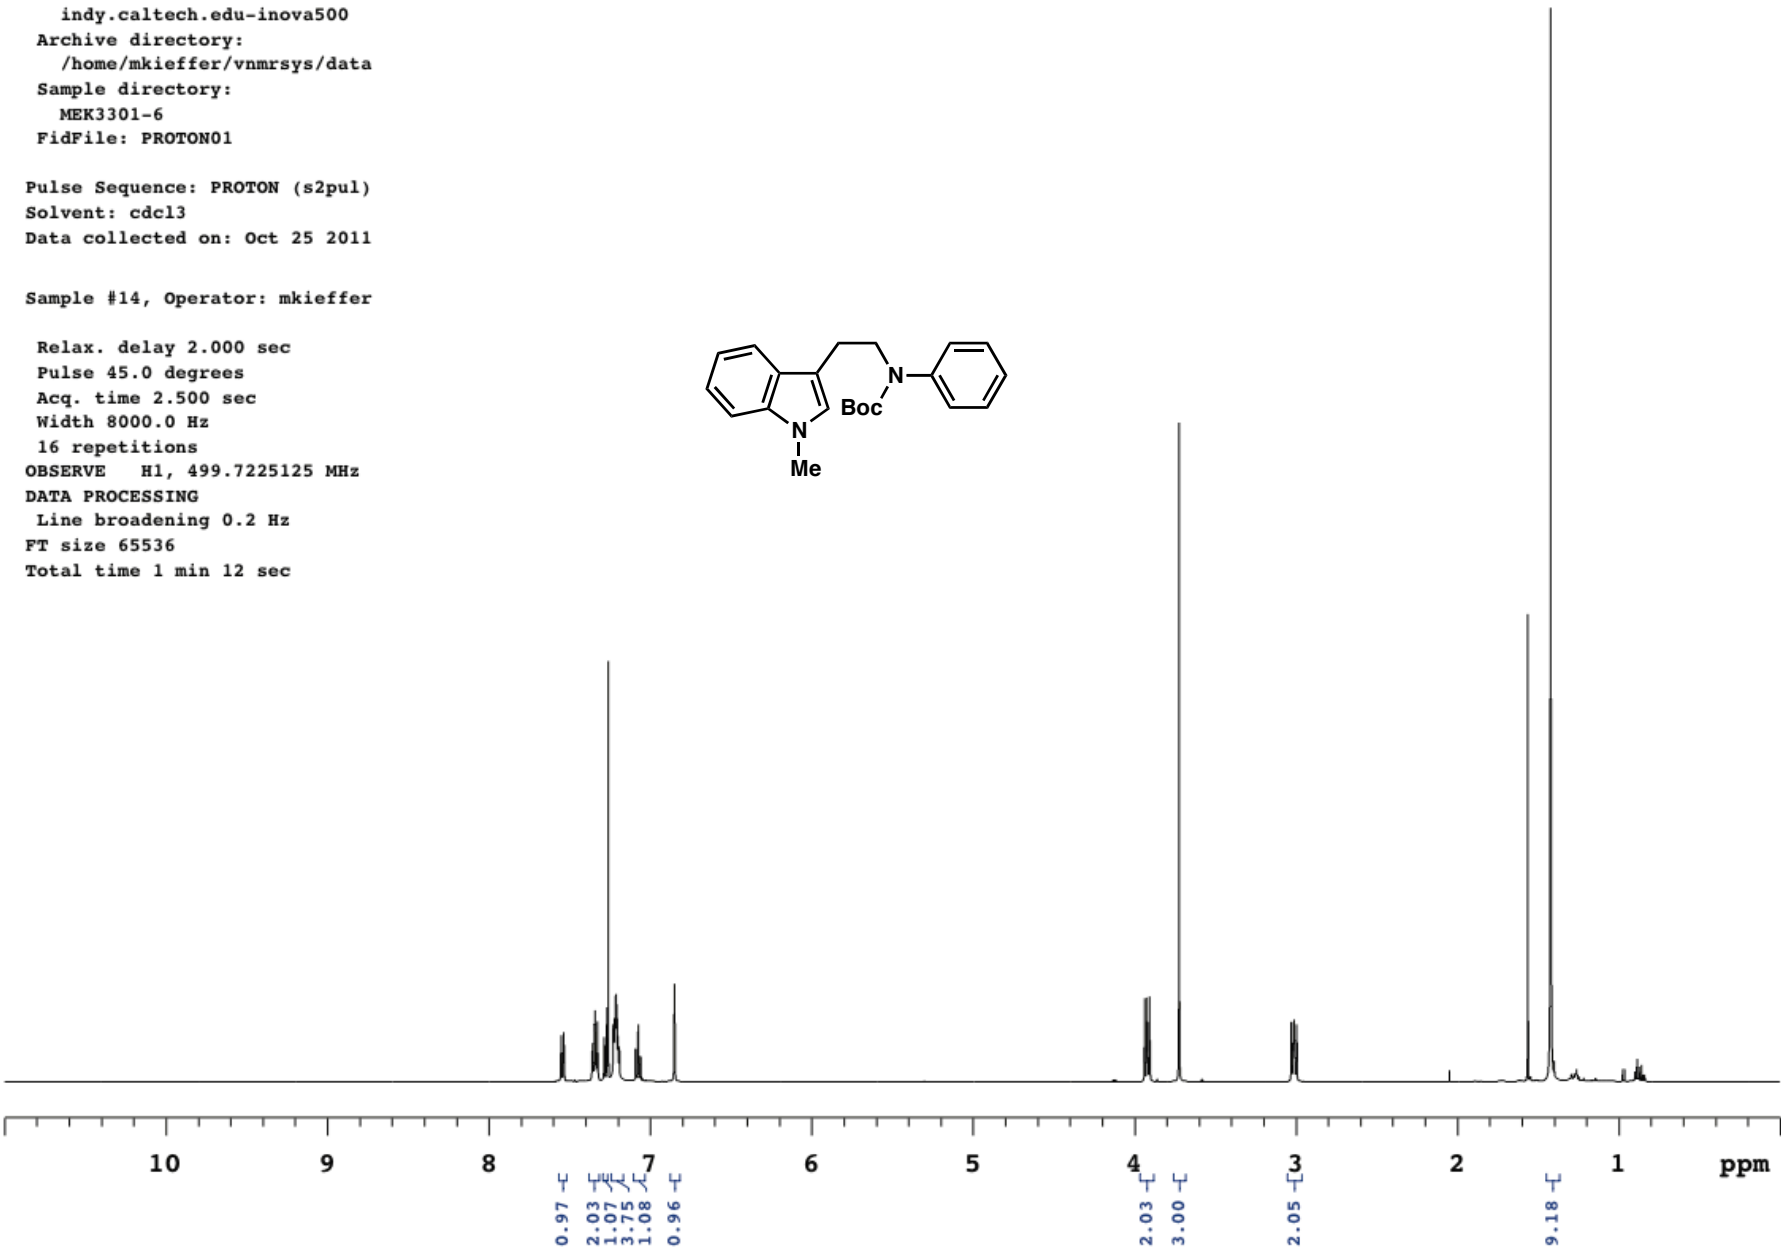

MEK4100

Sample Name:  
MEK4100  
Data Collected on:  
indy.caltech.edu-inova500  
Archive directory:  
/home/kangway/vnmrsys/data  
Sample directory:  
MEK4100  
FidFile: PROTON01

Pulse Sequence: PROTON (s2pul)  
Solvent: cdcl3  
Data collected on: Apr 18 2012

Sample #48, Operator: kangway

Relax. delay 5.000 sec  
Pulse 45.0 degrees  
Acq. time 2.500 sec  
Width 8000.0 Hz  
32 repetitions  
OBSERVE H1, 499.7127408 MHz  
DATA PROCESSING  
Line broadening 0.2 Hz  
FT size 65536  
Total time 4 min 0 sec

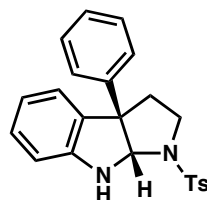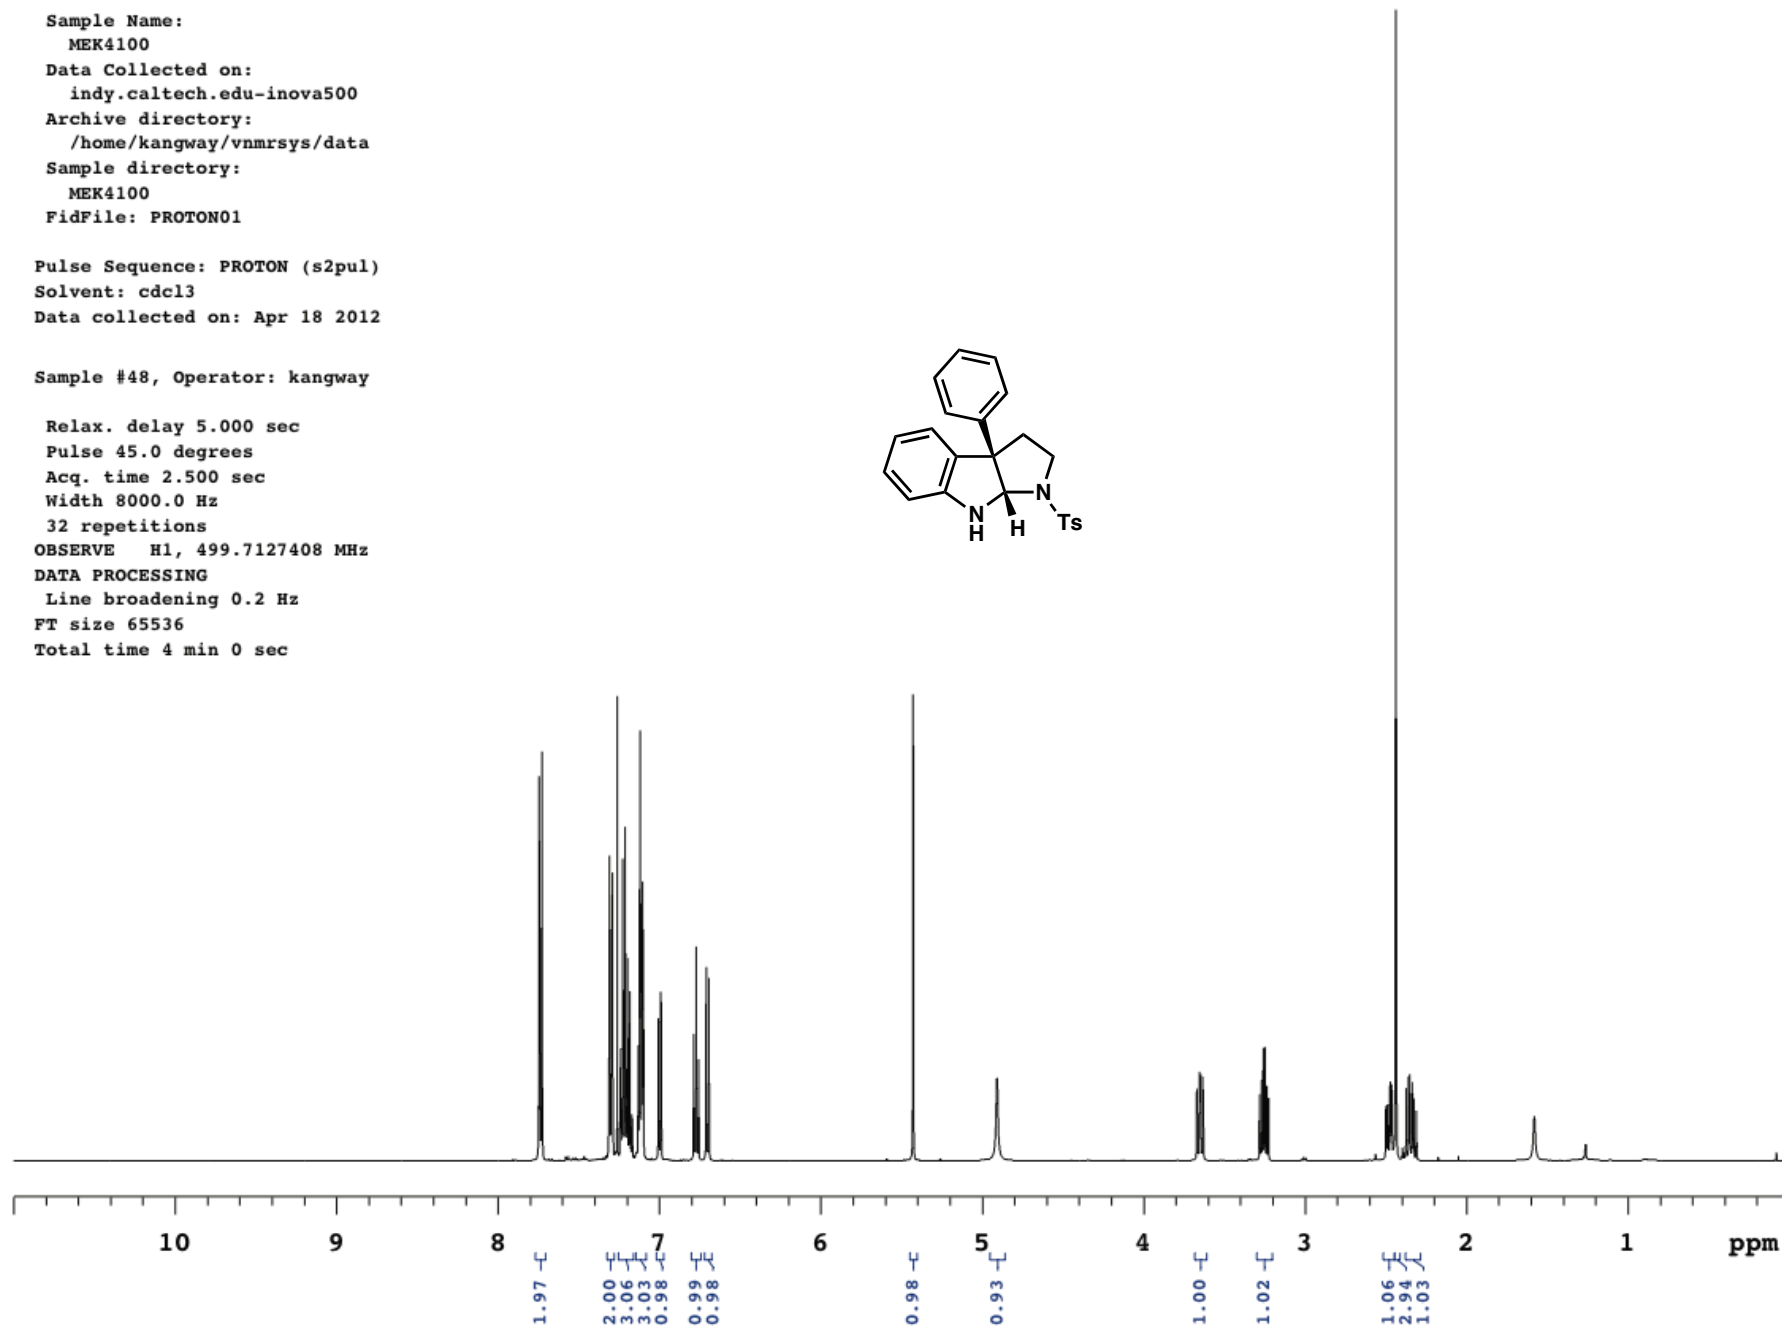

MEK4100

Sample Name:

MEK4100

Data Collected on:

indy.caltech.edu-inova500

Archive directory:

/home/kangway/vnmrsys/data

Sample directory:

MEK4100

FidFile: CARBON01

Pulse Sequence: CARBON (s2pul)

Solvent: cdcl3

Data collected on: Apr 18 2012

Sample #48, Operator: kangway

Relax. delay 1.000 sec

Pulse 45.0 degrees

Acq. time 1.042 sec

Width 31446.5 Hz

512 repetitions

OBSERVE C13, 125.6528719 MHz

DECOUPLE H1, 499.7152303 MHz

Power 39 dB

continuously on

WALTZ-16 modulated

DATA PROCESSING

Line broadening 0.5 Hz

FT size 65536

Total time 17 min

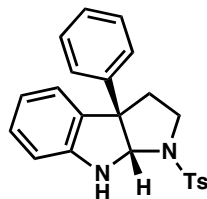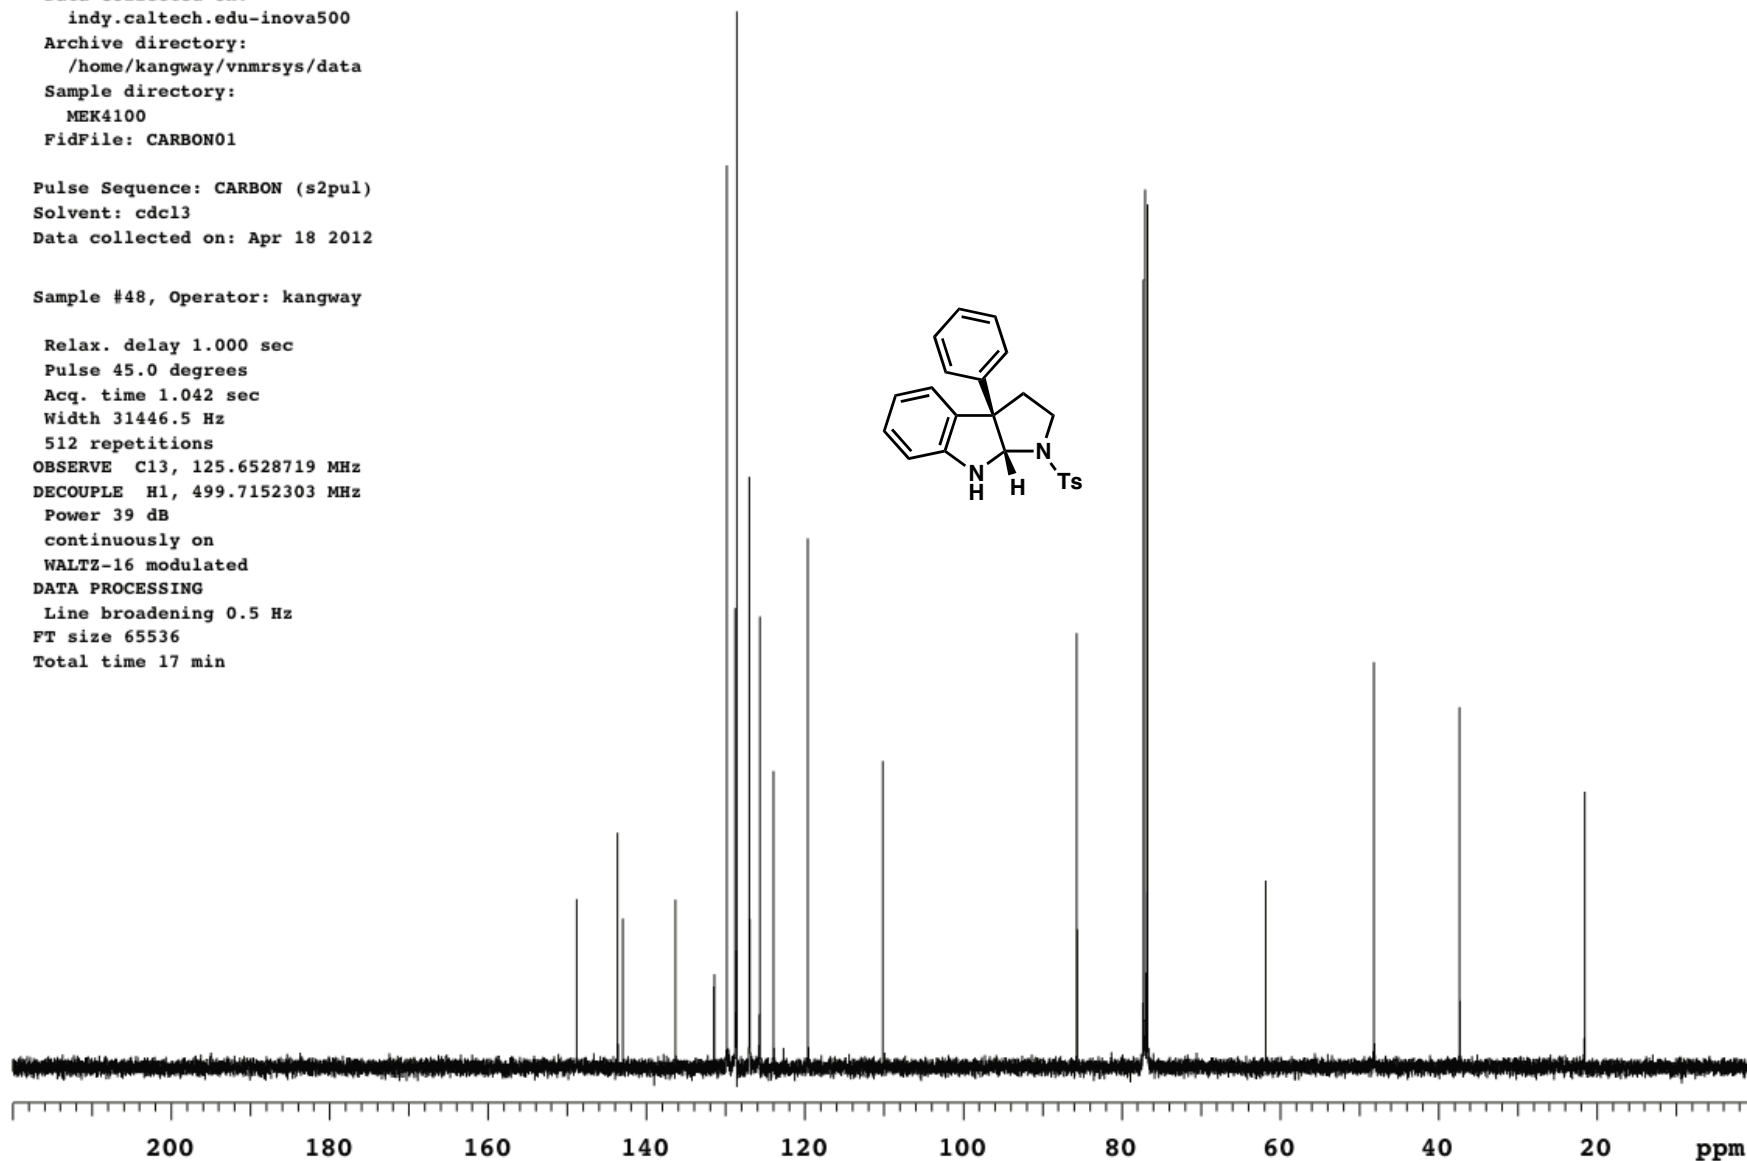

KVC13-059-A

Sample Name:

KVC13-059-A

Data Collected on:

indy.caltech.edu-inova500

Archive directory:

/home/kangway/vnmrsys/data

Sample directory:

KVC13-059-A

FidFile: PROTON02

Pulse Sequence: PROTON (s2pul)

Solvent: cdcl3

Data collected on: May 10 2012

Sample #48, Operator: kangway

Relax. delay 5.000 sec

Pulse 45.0 degrees

Acq. time 2.500 sec

Width 8000.0 Hz

32 repetitions

OBSERVE H1, 499.7127410 MHz

DATA PROCESSING

Line broadening 0.2 Hz

FT size 65536

Total time 4 min 0 sec

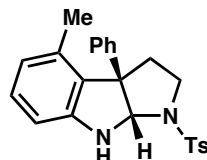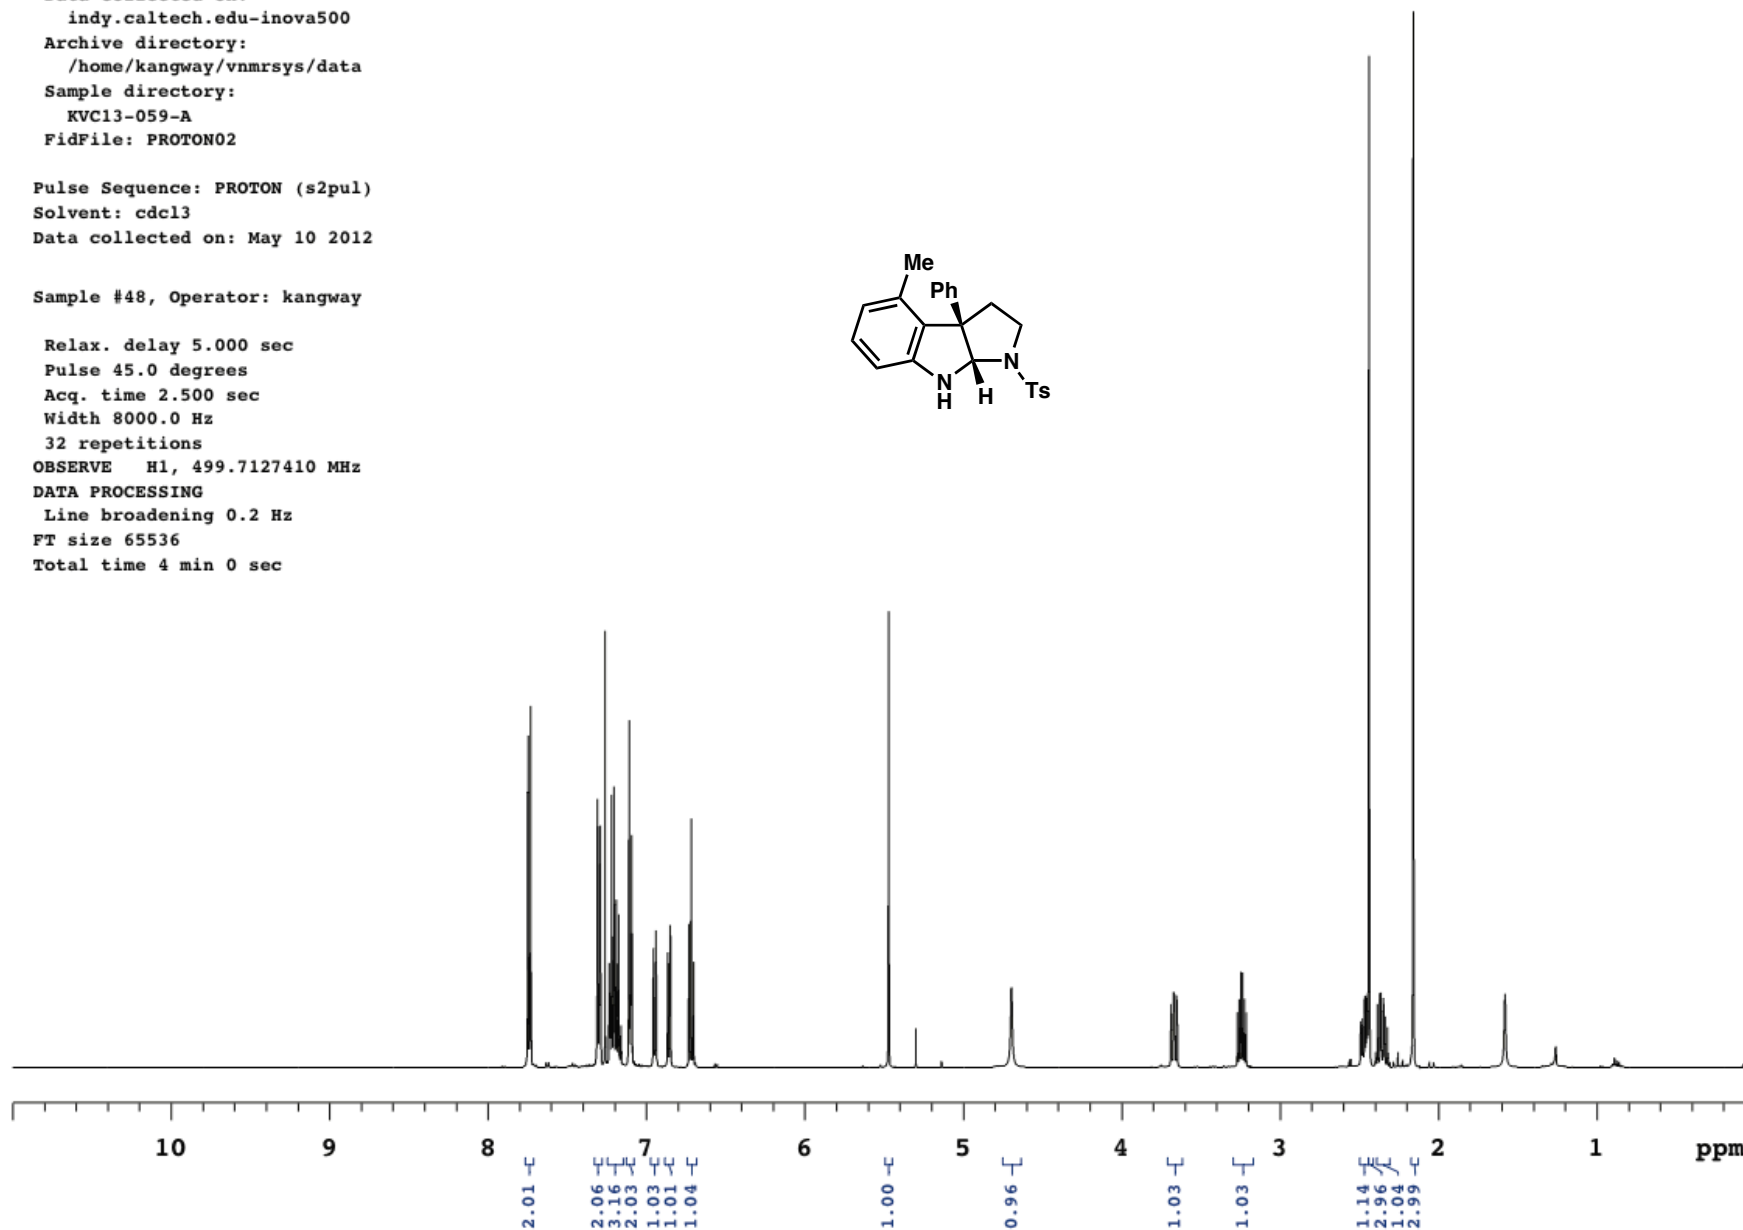

KVC13-059-A

Sample Name:  
KVC13-059-A  
Data Collected on:  
indy.caltech.edu-inova500  
Archive directory:  
/home/kangway/vnmrsys/data  
Sample directory:  
KVC13-059-A  
FidFile: CARBON01

Pulse Sequence: CARBON (s2pul)  
Solvent: cdcl3  
Data collected on: May 10 2012

Sample #40, Operator: kangway

Relax. delay 1.000 sec  
Pulse 45.0 degrees  
Acq. time 1.042 sec  
Width 31446.5 Hz  
512 repetitions  
OBSERVE C13, 125.6528719 MHz  
DECOUPLE H1, 499.7152303 MHz  
Power 39 dB  
continuously on  
WALTZ-16 modulated  
DATA PROCESSING  
Line broadening 0.5 Hz  
FT size 65536  
Total time 17 min

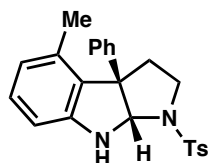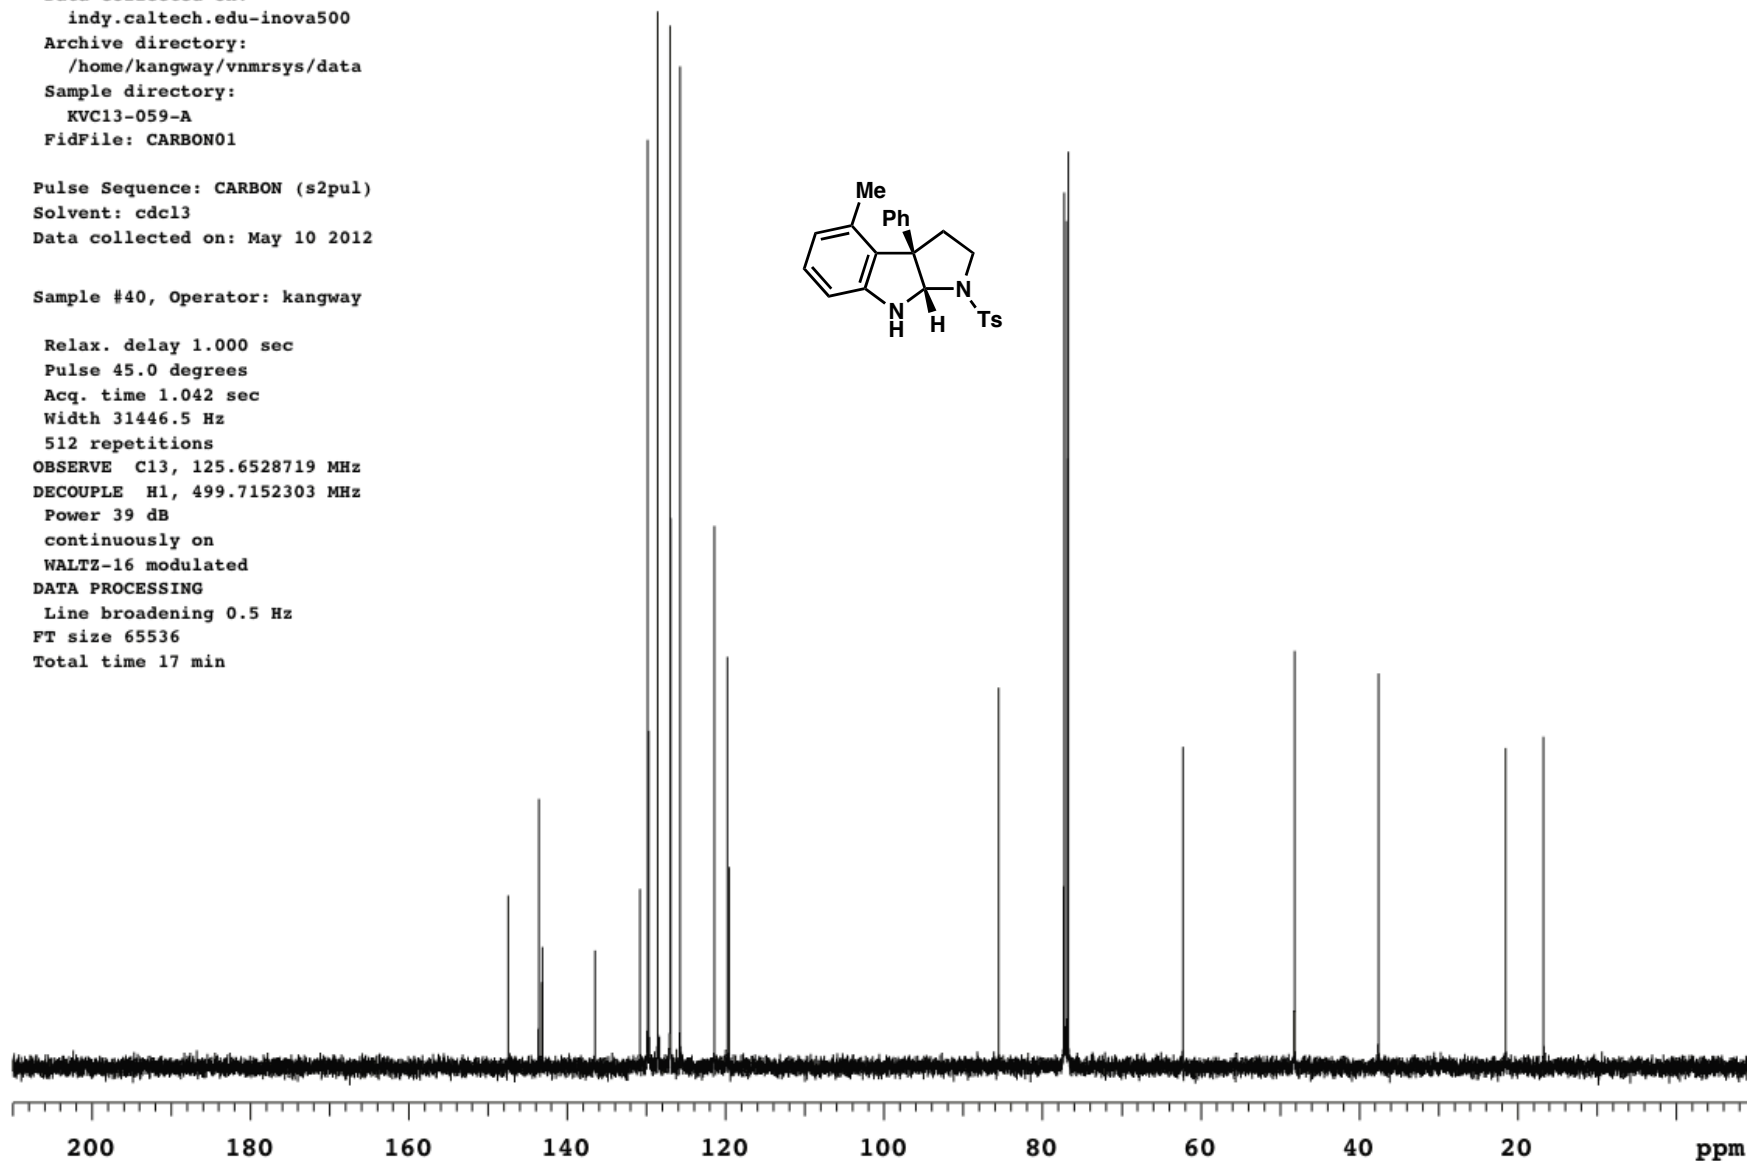



KVC13-069-A

Sample Name:  
KVC13-069-A  
Data Collected on:  
indy.caltech.edu-inova500  
Archive directory:  
/home/kangway/vnmrsys/data  
Sample directory:  
KVC13-069-A  
FidFile: PROTON01

Pulse Sequence: PROTON (s2pul)  
Solvent: cdcl3  
Data collected on: May 12 2012

Sample #40, Operator: kangway

Relax. delay 5.000 sec  
Pulse 45.0 degrees  
Acq. time 2.500 sec  
Width 8000.0 Hz  
32 repetitions  
OBSERVE H1, 499.7127408 MHz  
DATA PROCESSING  
Line broadening 0.2 Hz  
FT size 65536  
Total time 4 min 0 sec

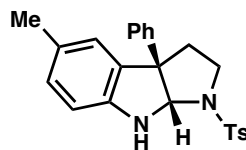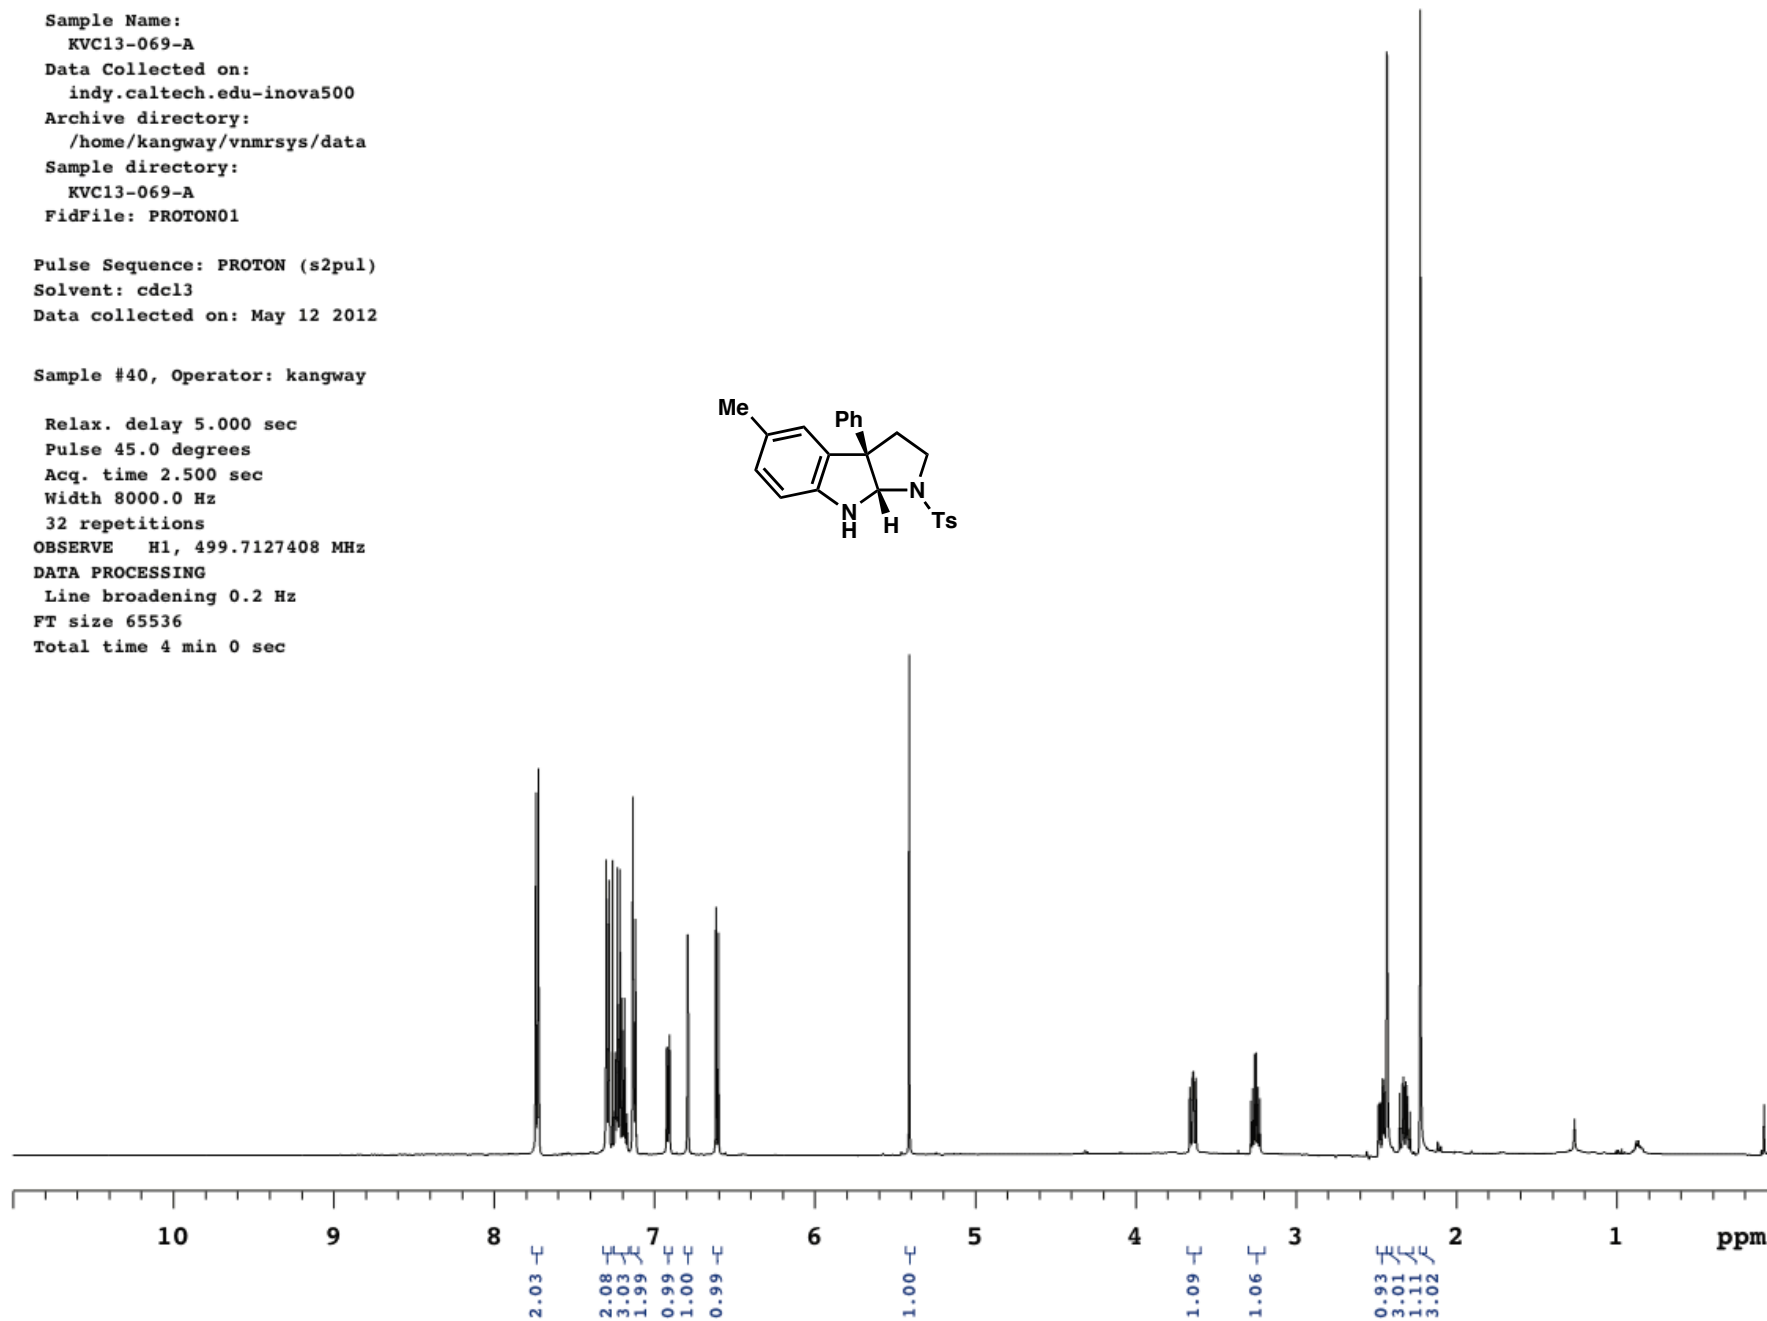

KVC13-069-A

Sample Name:

KVC13-069-A

Data Collected on:

indy.caltech.edu-inova500

Archive directory:

/home/kangway/vnmrsys/data

Sample directory:

KVC13-069-A

FidFile: CARBON01

Pulse Sequence: CARBON (s2pul)

Solvent: cdcl3

Data collected on: May 12 2012

Sample #40, Operator: kangway

Relax. delay 1.000 sec

Pulse 45.0 degrees

Acq. time 1.042 sec

Width 31446.5 Hz

512 repetitions

OBSERVE C13, 125.6528729 MHz

DECOUPLE H1, 499.7152303 MHz

Power 39 dB

continuously on

WALTZ-16 modulated

DATA PROCESSING

Line broadening 0.5 Hz

FT size 65536

Total time 17 min

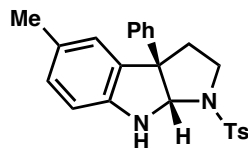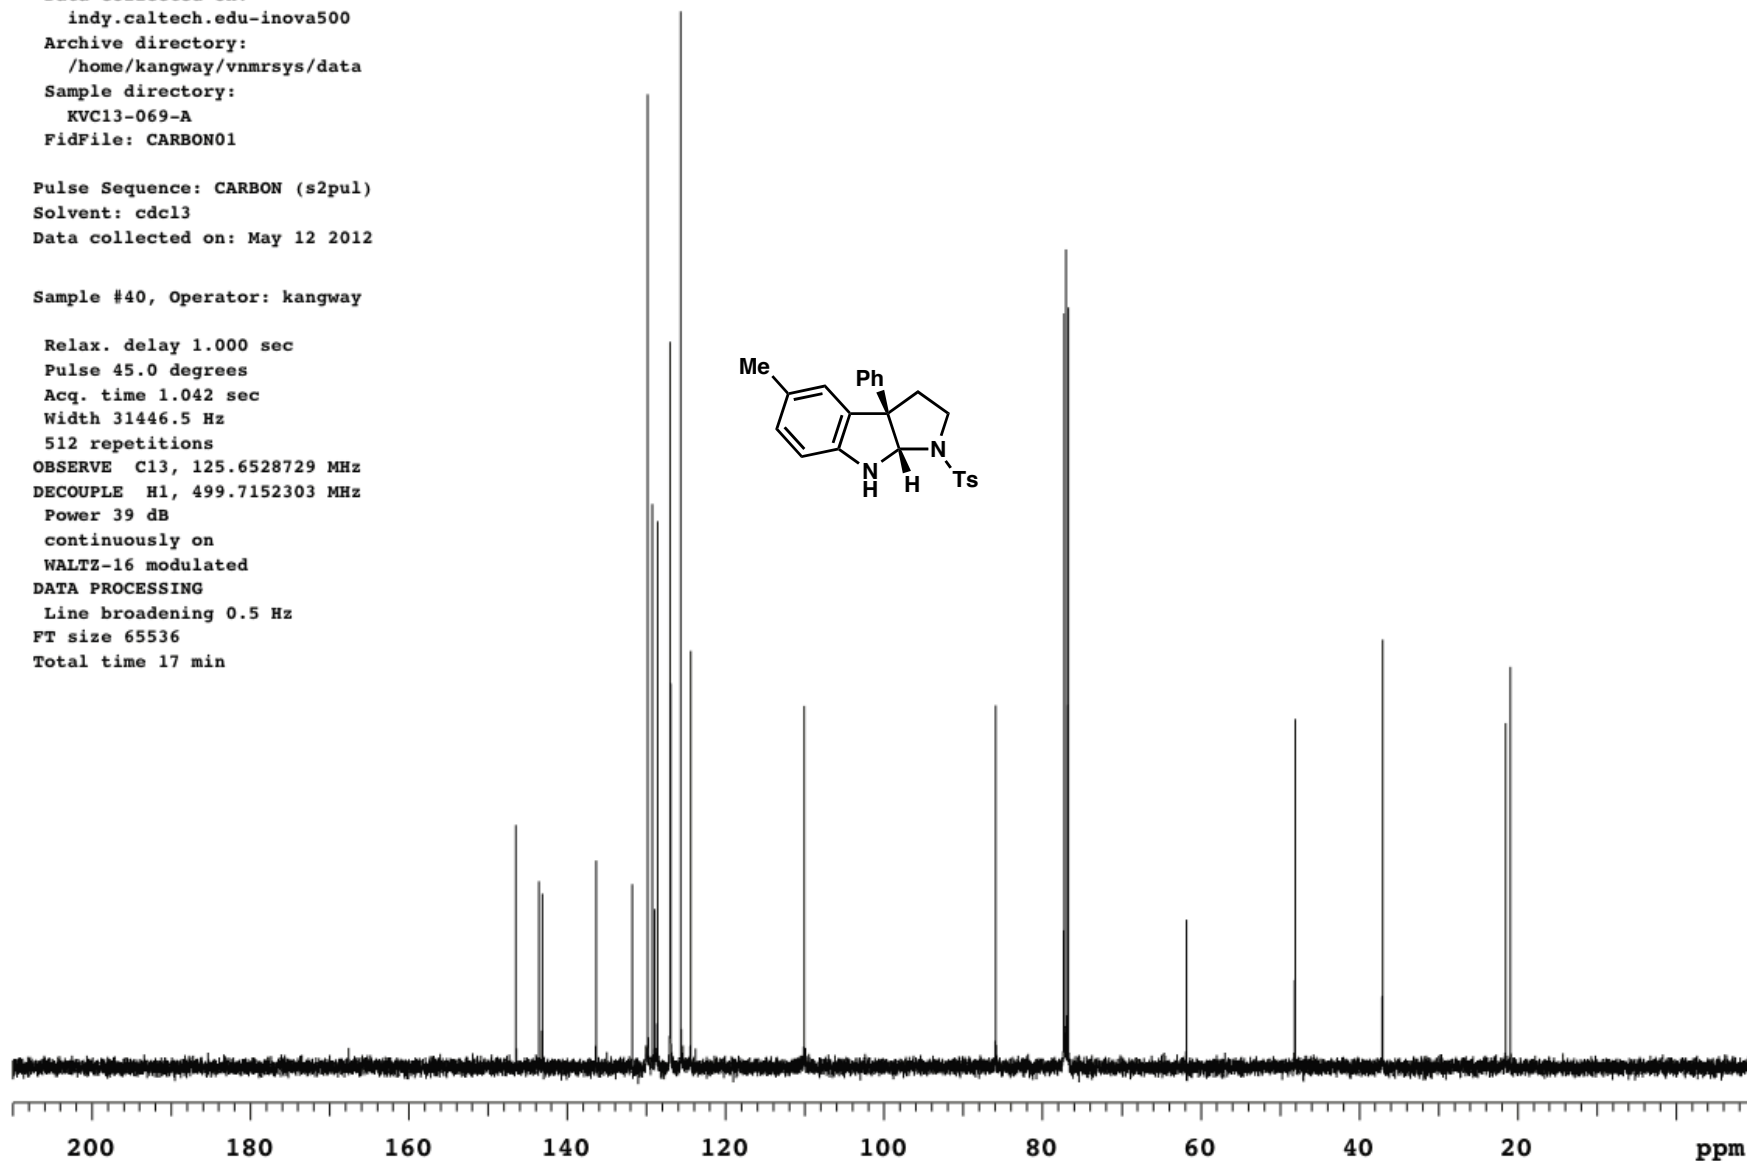

KVC13-059-B

Sample Name:  
KVC13-059-B  
Data Collected on:  
indy.caltech.edu-inova500  
Archive directory:  
/home/kangway/vnmrsys/data  
Sample directory:  
KVC13-059-B  
FidFile: PROTON01

Pulse Sequence: PROTON (s2pul)  
Solvent: cdcl3  
Data collected on: May 10 2012

Sample #40, Operator: kangway

Relax. delay 5.000 sec  
Pulse 45.0 degrees  
Acq. time 2.500 sec  
Width 8000.0 Hz  
32 repetitions  
OBSERVE H1, 499.7127408 MHz  
DATA PROCESSING  
Line broadening 0.2 Hz  
FT size 65536  
Total time 4 min 0 sec

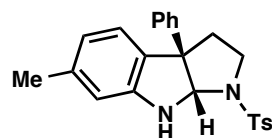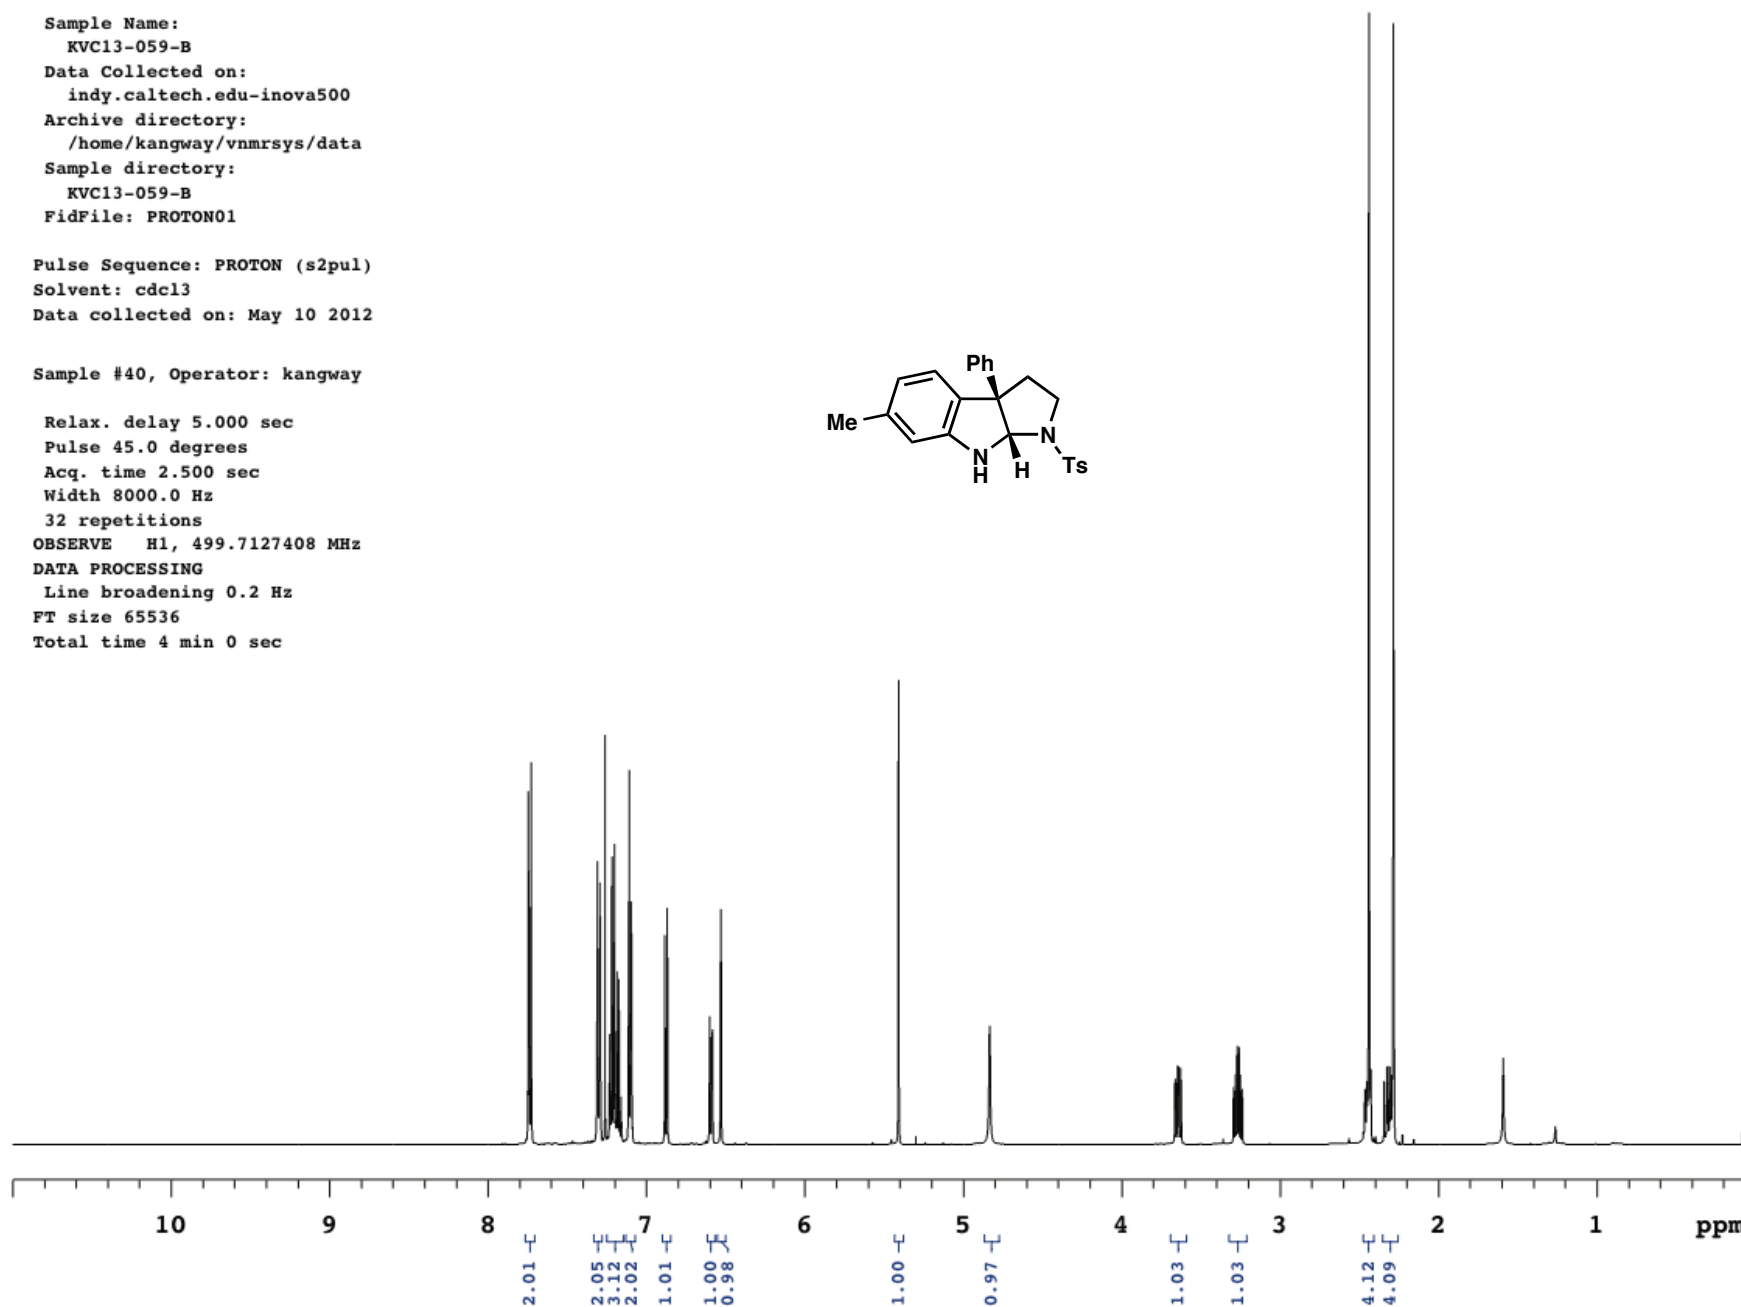

KVC13-059-B

Sample Name:  
KVC13-059-B  
Data Collected on:  
indy.caltech.edu-inova500  
Archive directory:  
/home/kangway/vnmrsys/data  
Sample directory:  
KVC13-059-B  
FidFile: CARBON01

Pulse Sequence: CARBON (s2pul)  
Solvent: cdcl3  
Data collected on: May 10 2012

Sample #40, Operator: kangway

Relax. delay 1.000 sec  
Pulse 45.0 degrees  
Acq. time 1.042 sec  
Width 31446.5 Hz  
512 repetitions  
OBSERVE C13, 125.6528729 MHz  
DECOUPLE H1, 499.7152303 MHz  
Power 39 dB  
continuously on  
WALTZ-16 modulated  
DATA PROCESSING  
Line broadening 0.5 Hz  
FT size 65536  
Total time 17 min

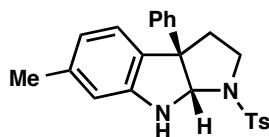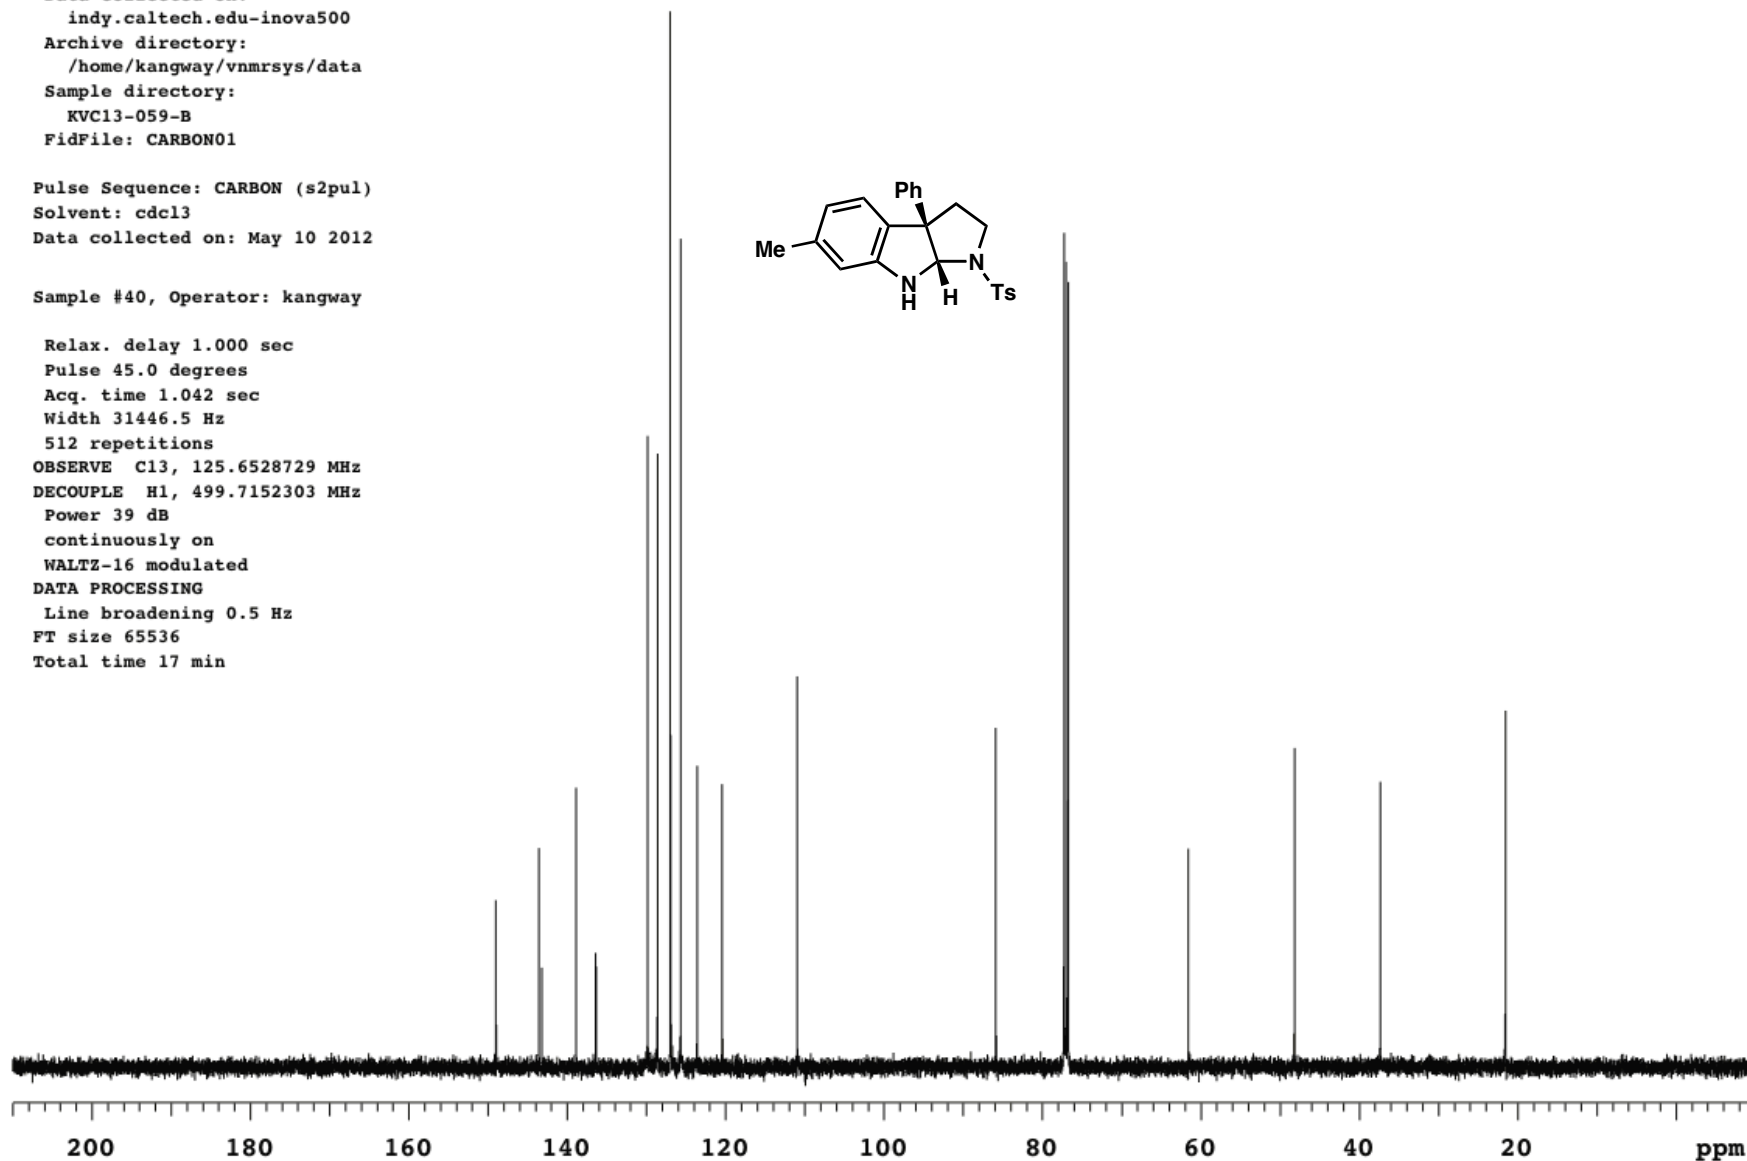

KVC13-059-C

Sample Name:  
KVC13-059-C  
Data Collected on:  
indy.caltech.edu-inova500  
Archive directory:  
/home/kangway/vnmrsys/data  
Sample directory:  
KVC13-059-C  
FidFile: PROTON01

Pulse Sequence: PROTON (s2pul)  
Solvent: cdcl3  
Data collected on: May 10 2012

Sample #41, Operator: kangway

Relax. delay 5.000 sec  
Pulse 45.0 degrees  
Acq. time 2.500 sec  
Width 8000.0 Hz  
32 repetitions  
OBSERVE H1, 499.7127408 MHz  
DATA PROCESSING  
Line broadening 0.2 Hz  
FT size 65536  
Total time 4 min 0 sec

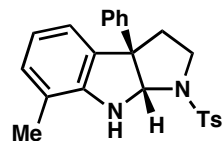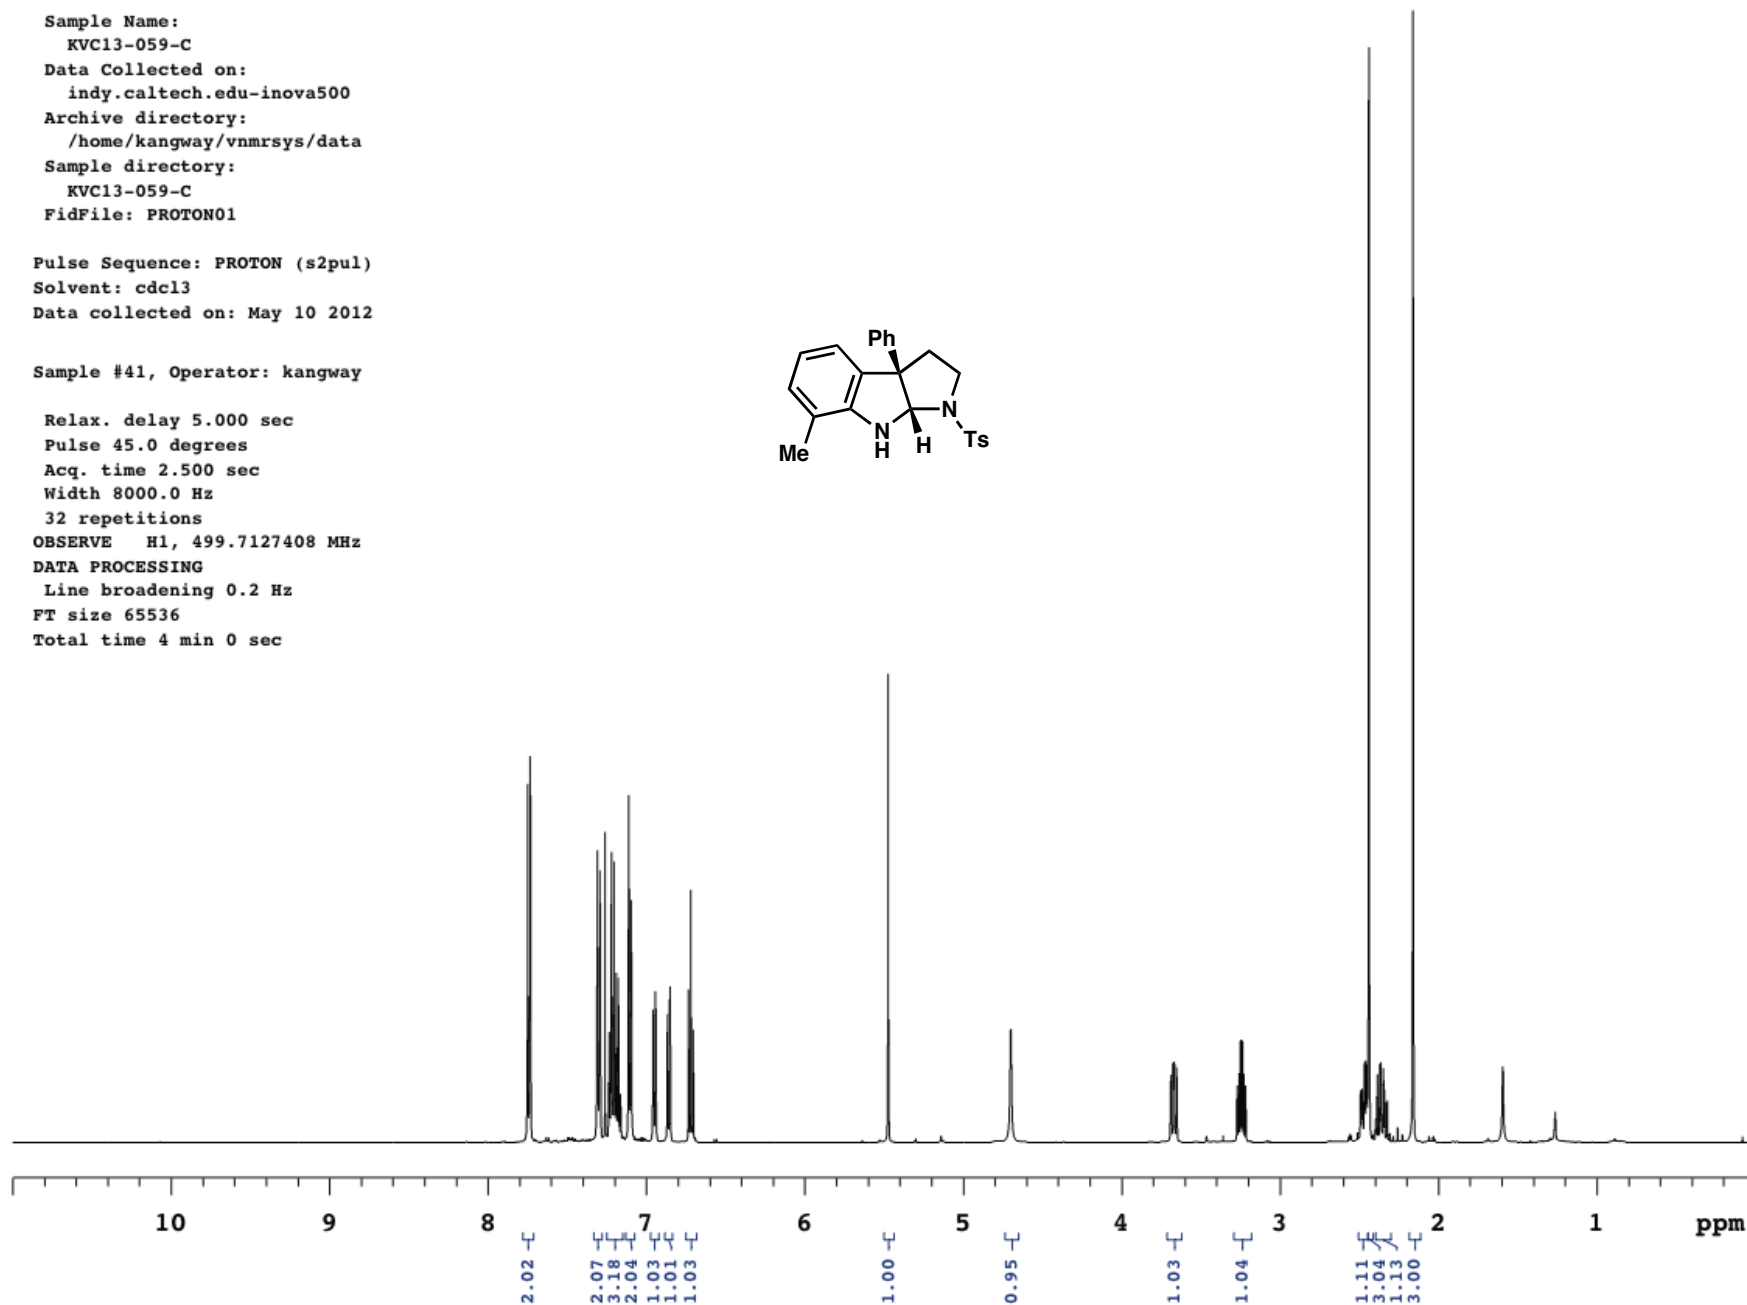

KVC13-059-C

Sample Name:

KVC13-059-C

Data Collected on:

indy.caltech.edu-inova500

Archive directory:

/home/kangway/vnmrsys/data

Sample directory:

KVC13-059-C

FidFile: CARBON01

Pulse Sequence: CARBON (s2pul)

Solvent: cdcl3

Data collected on: May 10 2012

Sample #41, Operator: kangway

Relax. delay 1.000 sec

Pulse 45.0 degrees

Acq. time 1.042 sec

Width 31446.5 Hz

512 repetitions

OBSERVE C13, 125.6528729 MHz

DECOUPLE H1, 499.7152303 MHz

Power 39 dB

continuously on

WALTZ-16 modulated

DATA PROCESSING

Line broadening 0.5 Hz

FT size 65536

Total time 17 min

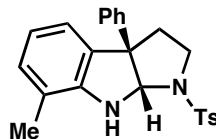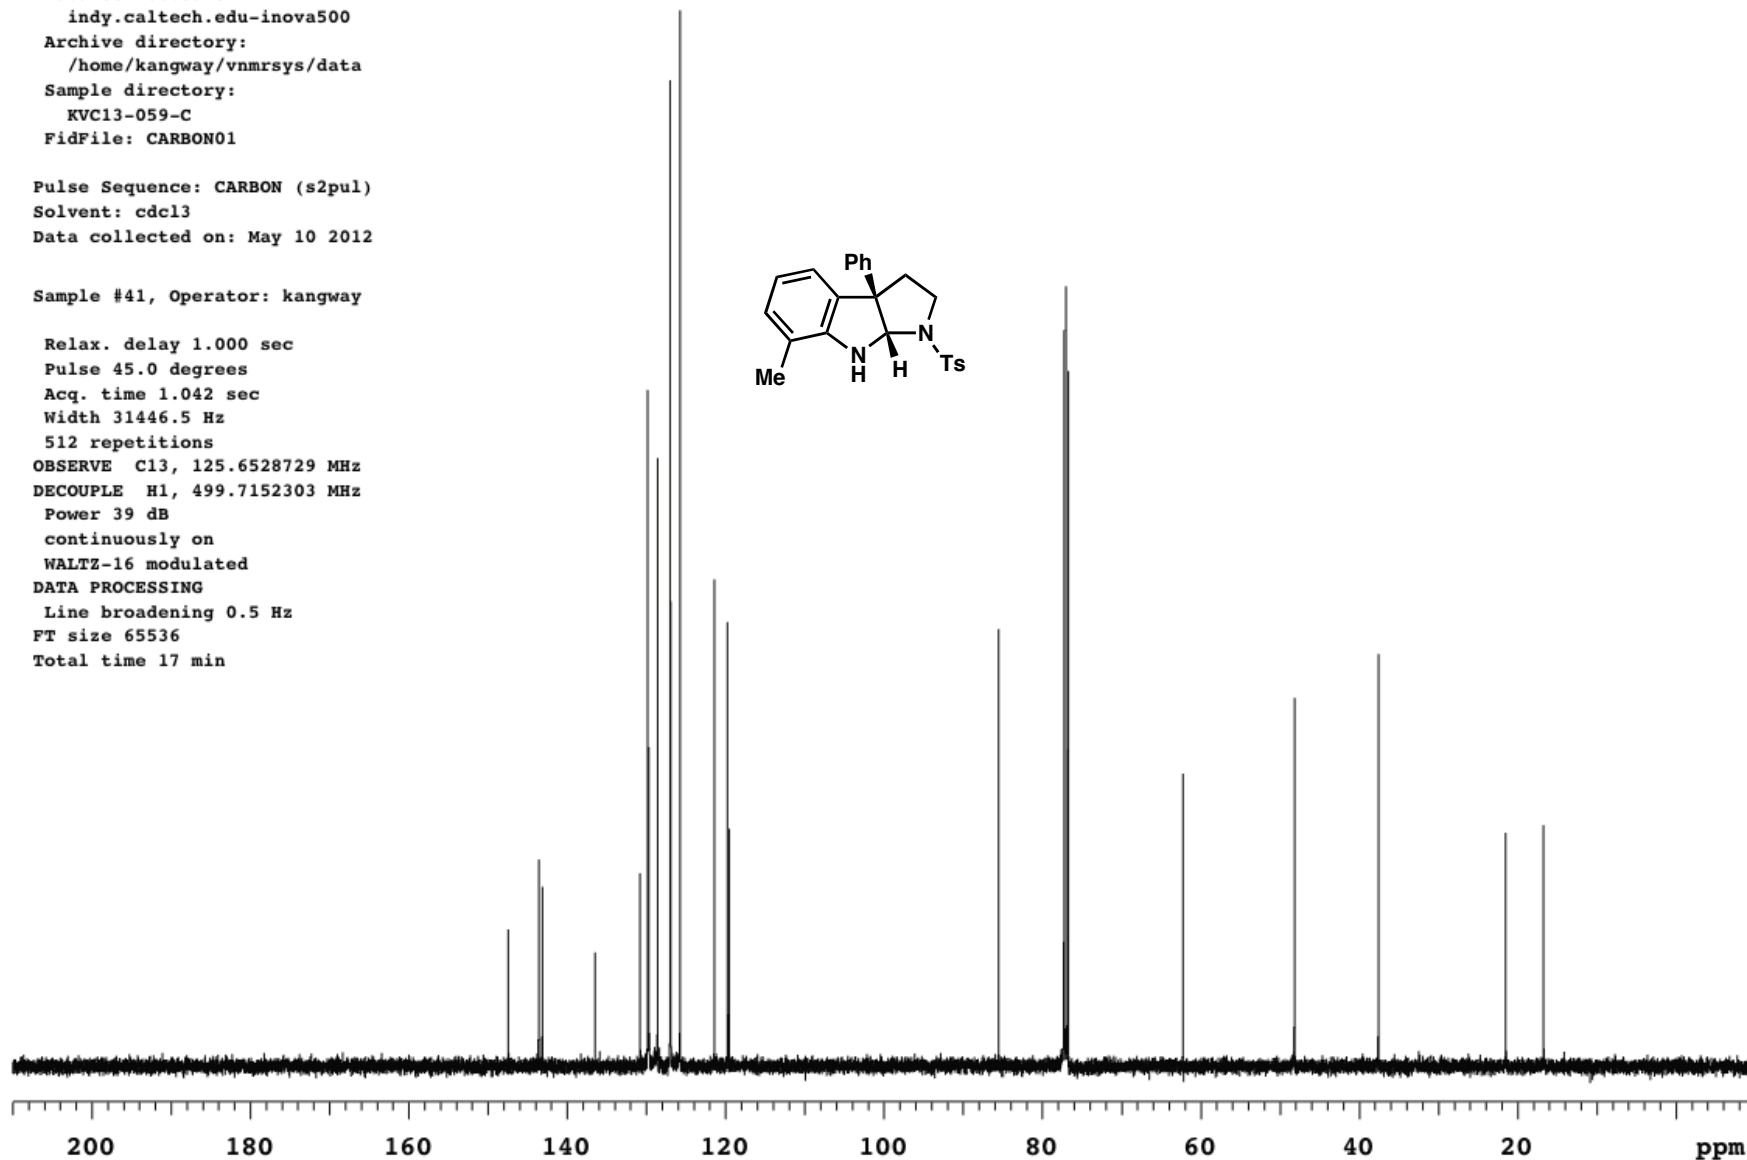

KVC13-069-B

Sample Name:  
KVC13-069-B  
Data Collected on:  
indy.caltech.edu-inova500  
Archive directory:  
/home/kangway/vnmrsys/data  
Sample directory:  
KVC13-069-B  
FidFile: PROTON02

Pulse Sequence: PROTON (s2pul)  
Solvent: cdcl3  
Data collected on: May 14 2012

Sample #13, Operator: kangway

Relax. delay 1.000 sec  
Pulse 45.0 degrees  
Acq. time 2.500 sec  
Width 8000.0 Hz  
8 repetitions  
OBSERVE H1, 499.7127410 MHz  
DATA PROCESSING  
Line broadening 0.2 Hz  
FT size 65536  
Total time 0 min 28 sec

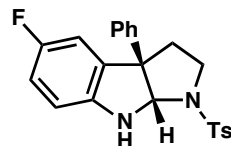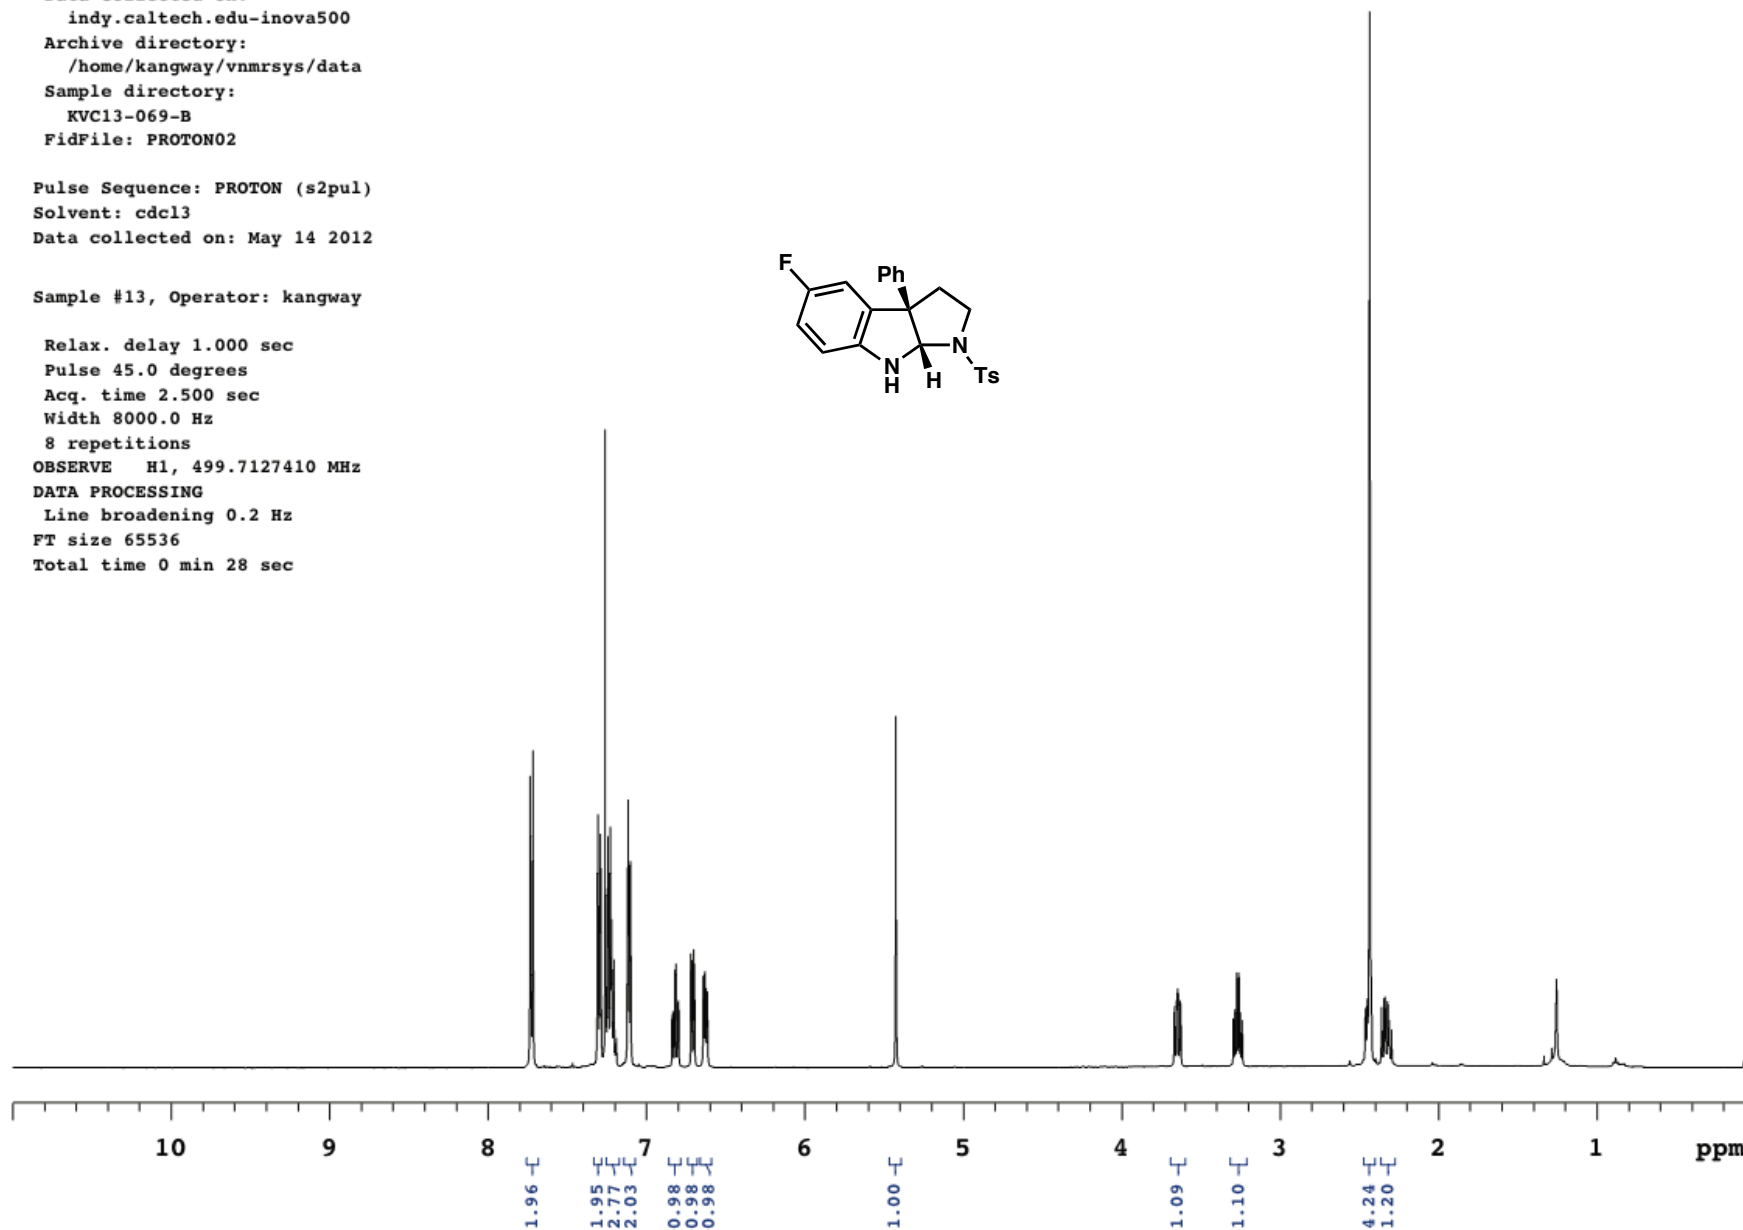

KVC13-069-B

Sample Name:

KVC13-069-B

Data Collected on:

indy.caltech.edu-inova500

Archive directory:

/home/kangway/vnmrsys/data

Sample directory:

KVC13-069-B

FidFile: CARBON02

Pulse Sequence: CARBON (s2pul)

Solvent: cdcl3

Data collected on: May 14 2012

Sample #13, Operator: kangway

Relax. delay 1.000 sec

Pulse 45.0 degrees

Acq. time 1.042 sec

Width 31446.5 Hz

1600 repetitions

OBSERVE C13, 125.6528700 MHz

DECOUPLE H1, 499.7152303 MHz

Power 39 dB

continuously on

WALTZ-16 modulated

DATA PROCESSING

Line broadening 0.5 Hz

FT size 65536

Total time 54 min

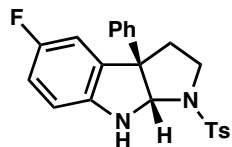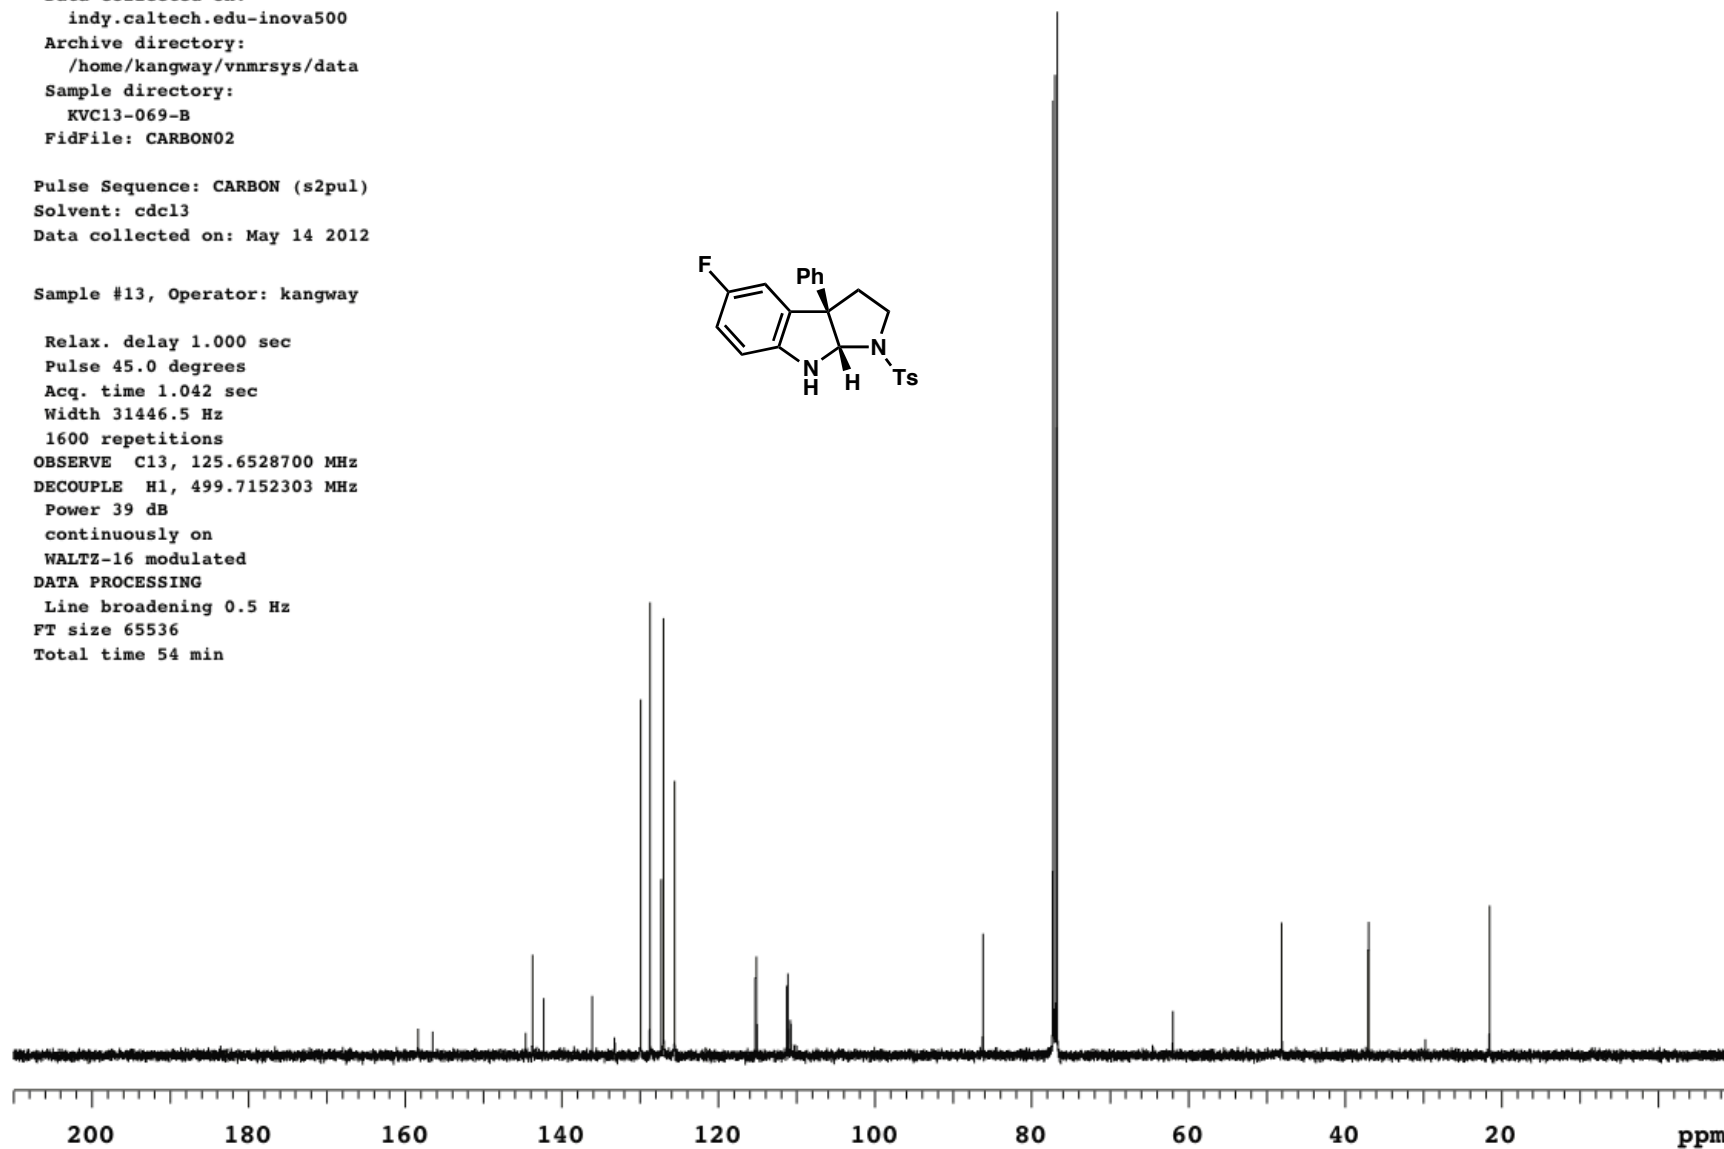



KVC13-069-C

indy.caltech.edu-inova500

```
/home/kangway/vnmrsys/data
```

KVC13-069-C

FidFile: PROTON01

Solvent: cdcl3

Data collected on: May 12 2012

Relax. delay 5.000 sec

Pulse 45.0 degrees

Acq. time 2.500 sec

Width 8000.0 Hz

32 repetitions

OBSERVE H1, 499.7127410 MHz

## DATA PROCESSING

Line broadening 0.2 Hz

FT size 65536

Total time 4 min 0 sec

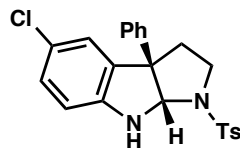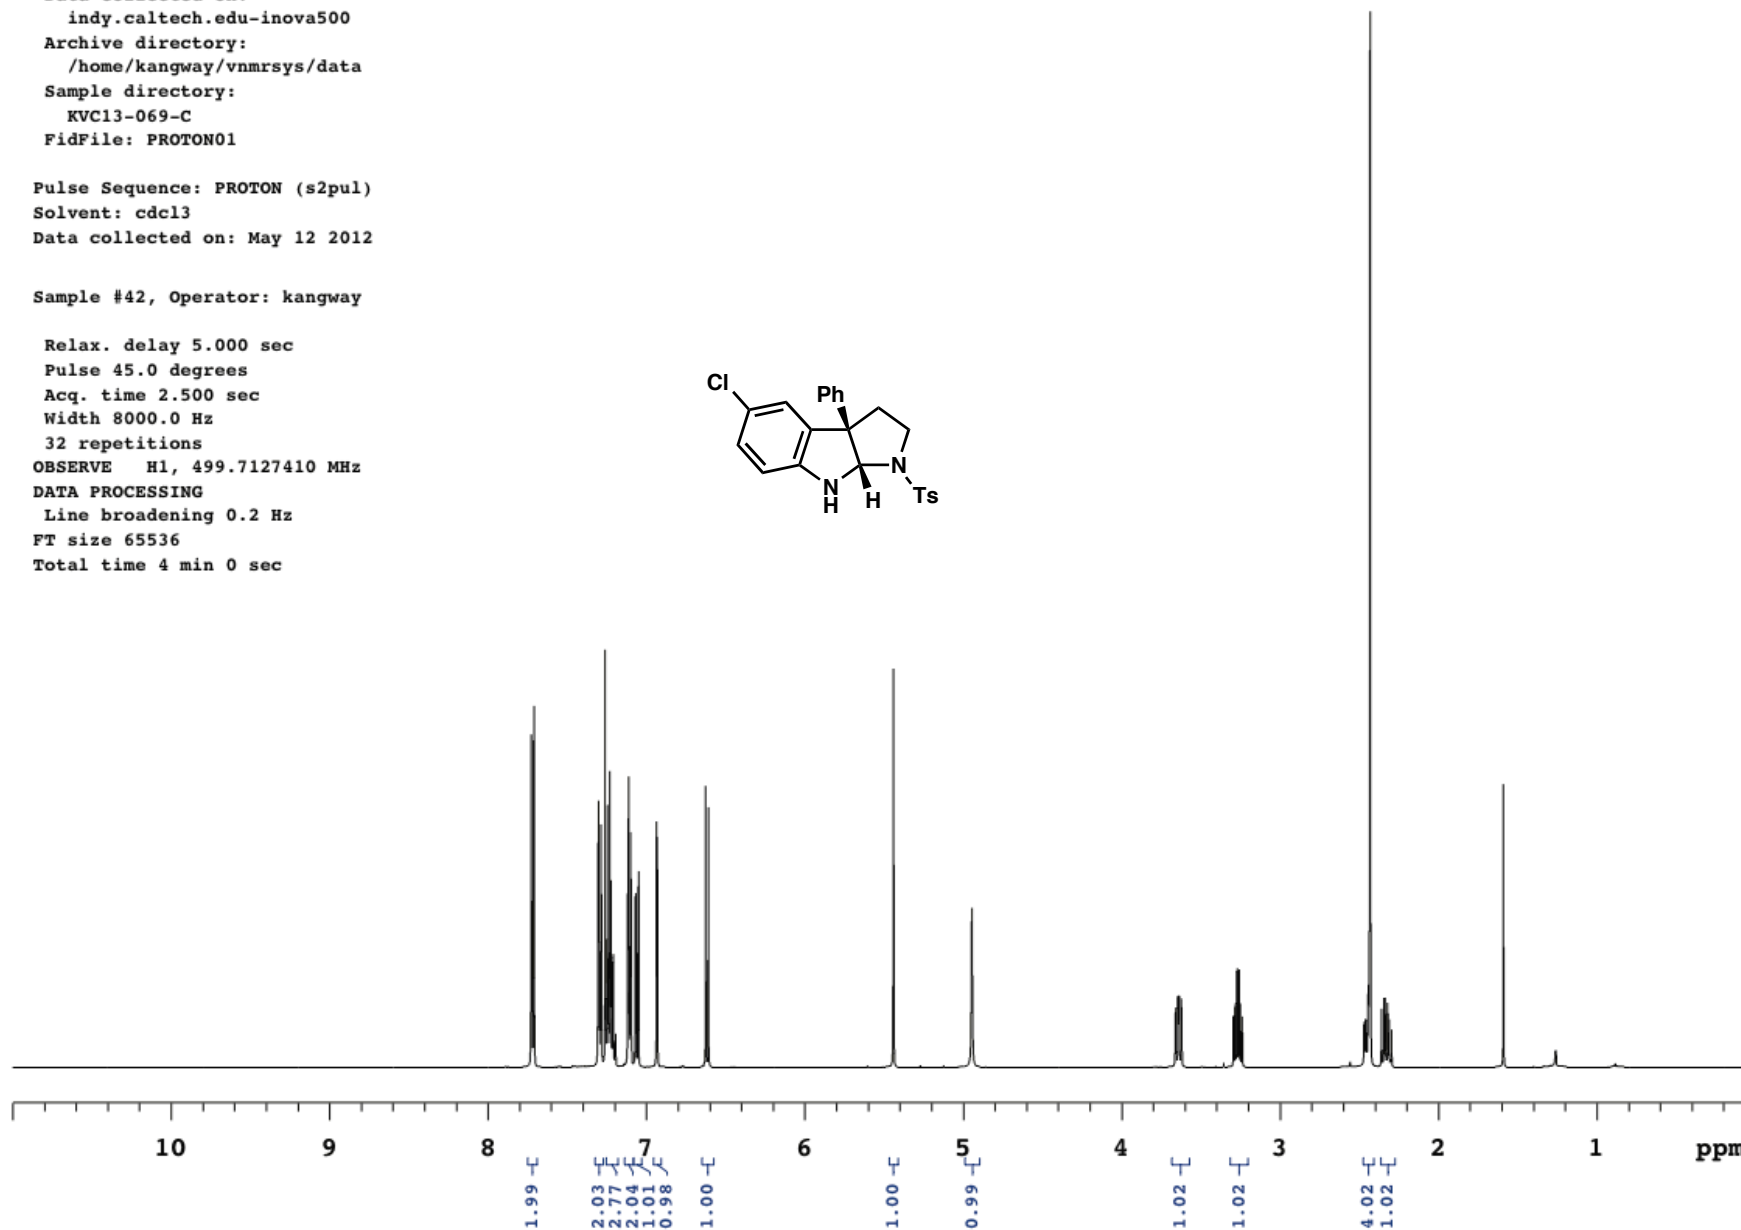

KVC13-069-C

Sample Name:

KVC13-069-C

Data Collected on:

indy.caltech.edu-inova500

Archive directory:

/home/kangway/vnmrsys/data

Sample directory:

KVC13-069-C

FidFile: CARBON01

Pulse Sequence: CARBON (s2pul)

Solvent: cdcl3

Data collected on: May 12 2012

Sample #42, Operator: kangway

Relax. delay 1.000 sec

Pulse 45.0 degrees

Acq. time 1.042 sec

Width 31446.5 Hz

512 repetitions

OBSERVE C13, 125.6528729 MHz

DECOUPLE H1, 499.7152303 MHz

Power 39 dB

continuously on

WALTZ-16 modulated

DATA PROCESSING

Line broadening 0.5 Hz

FT size 65536

Total time 17 min

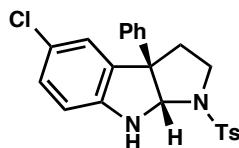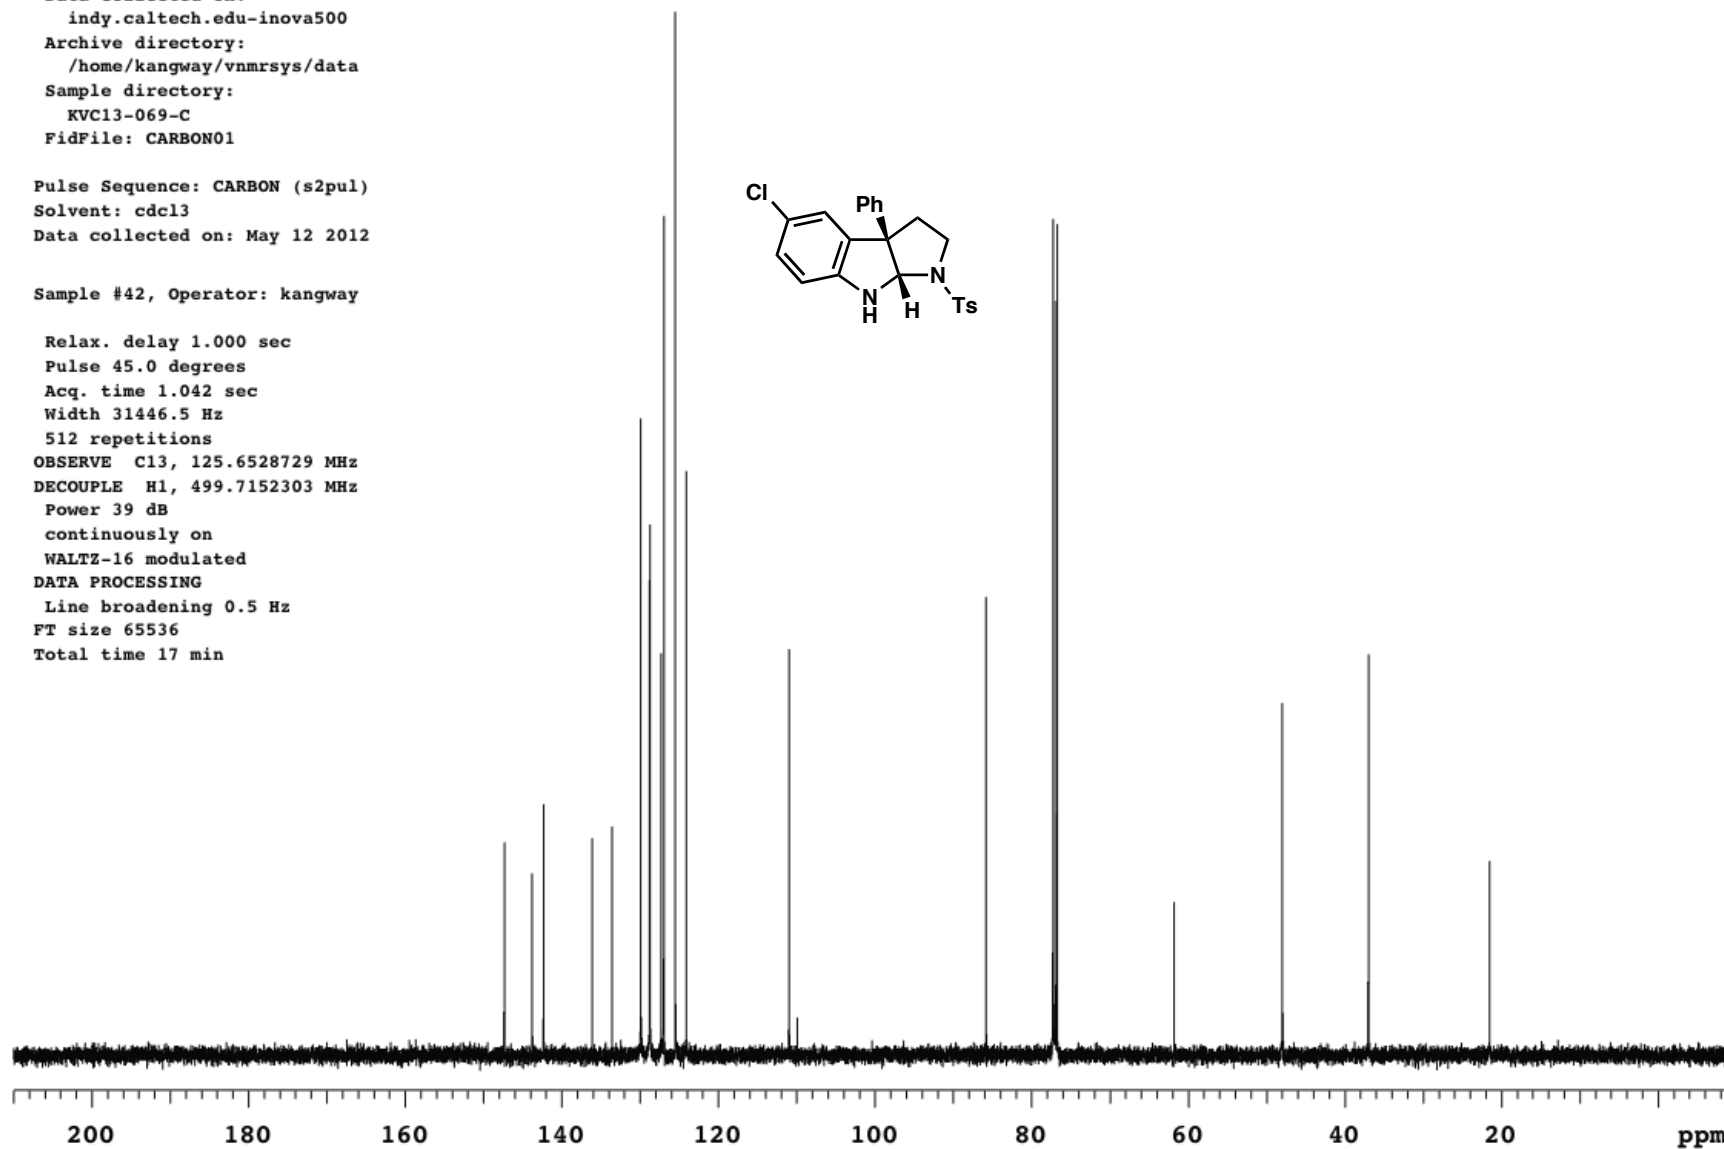

KVC13-059-D

Sample Name:  
KVC13-059-D  
Data Collected on:  
indy.caltech.edu-inova500  
Archive directory:  
/home/kangway/vnmrsys/data  
Sample directory:  
KVC13-059-D  
FidFile: PROTON02

Pulse Sequence: PROTON (s2pul)  
Solvent: cdcl3  
Data collected on: May 10 2012

Sample #49, Operator: kangway

Relax. delay 5.000 sec  
Pulse 45.0 degrees  
Acq. time 2.500 sec  
Width 8000.0 Hz  
32 repetitions  
OBSERVE H1, 499.7127410 MHz  
DATA PROCESSING  
Line broadening 0.2 Hz  
FT size 65536  
Total time 4 min 0 sec

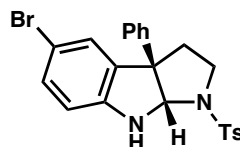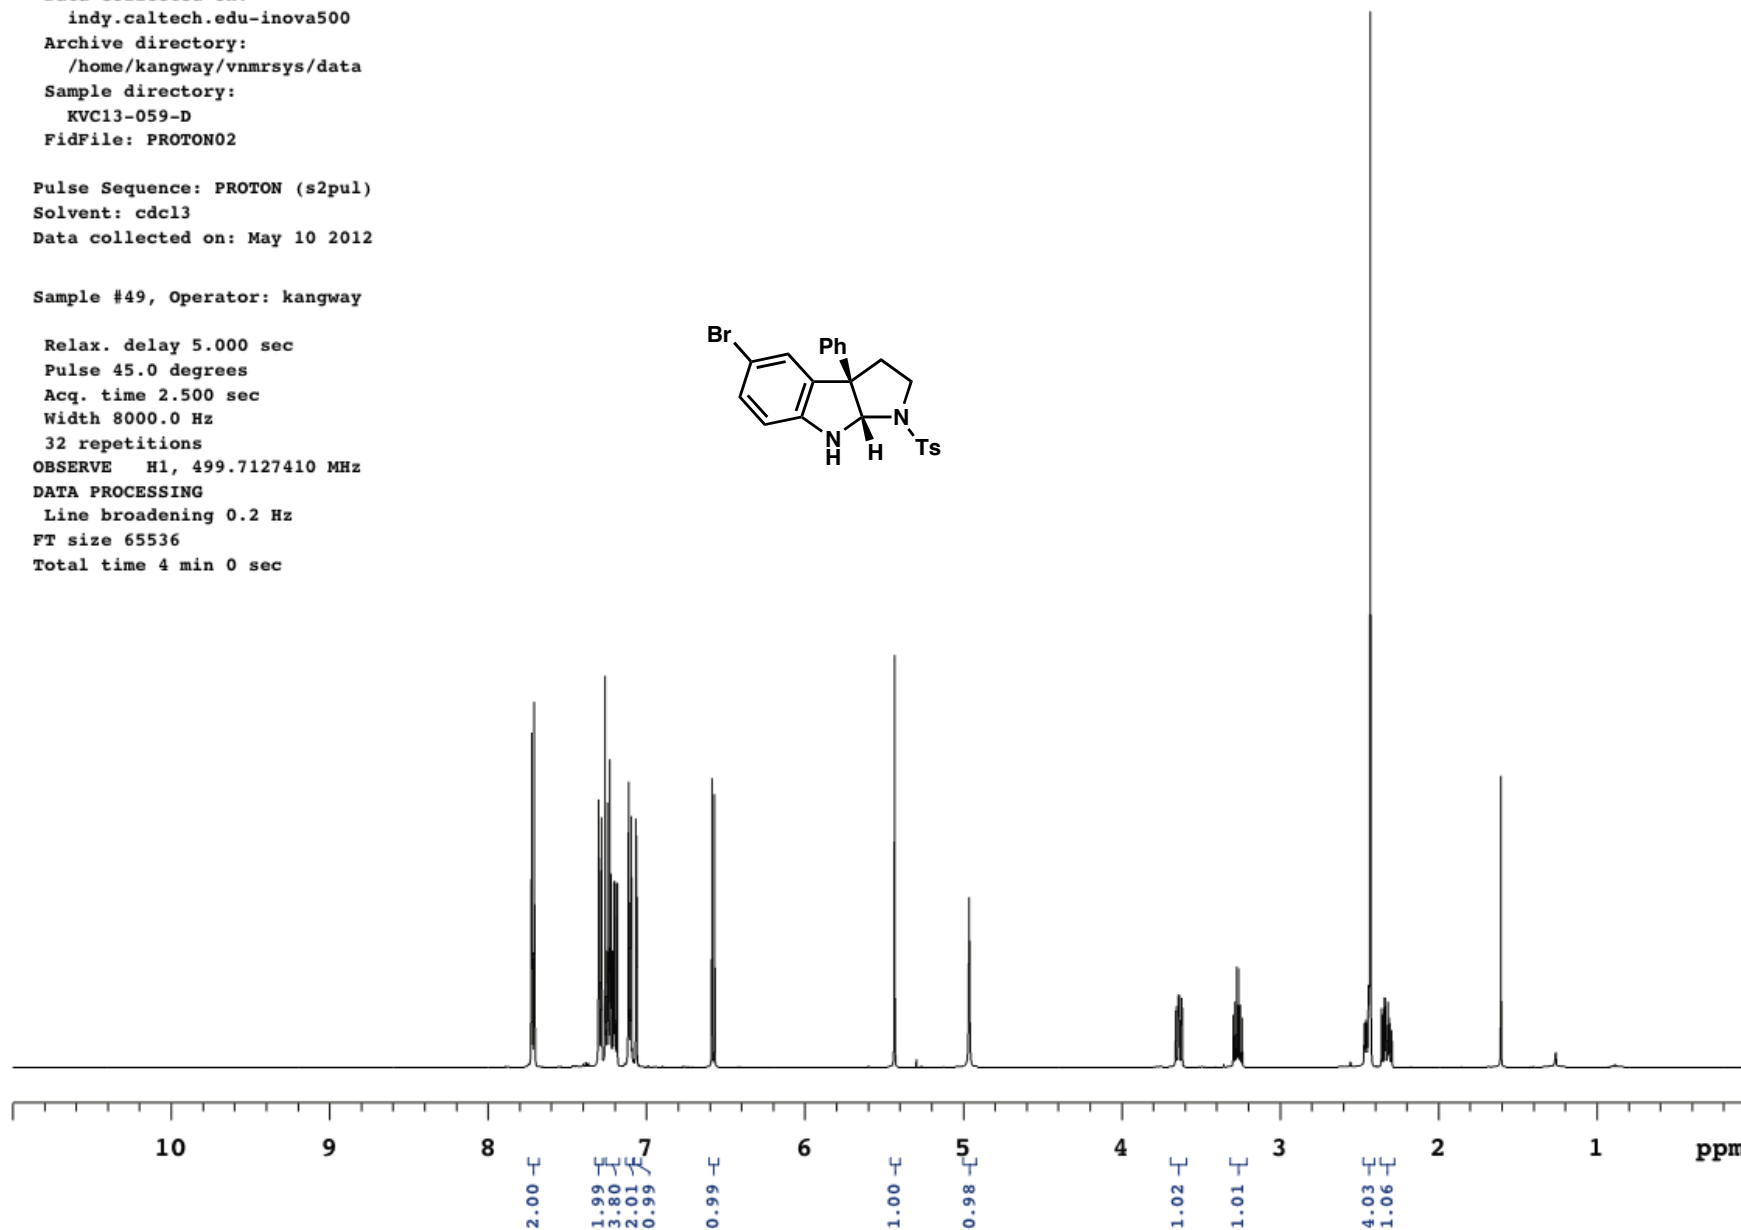

KVC13-059-D

Sample Name:

KVC13-059-D

Data Collected on:

indy.caltech.edu-inova500

Archive directory:

/home/kangway/vnmrsys/data

Sample directory:

KVC13-059-D

FidFile: CARBON01

Pulse Sequence: CARBON (s2pul)

Solvent: cdcl3

Data collected on: May 10 2012

Sample #41, Operator: kangway

Relax. delay 1.000 sec

Pulse 45.0 degrees

Acq. time 1.042 sec

Width 31446.5 Hz

512 repetitions

OBSERVE C13, 125.6528739 MHz

DECOUPLE H1, 499.7152303 MHz

Power 39 dB

continuously on

WALTZ-16 modulated

DATA PROCESSING

Line broadening 0.5 Hz

FT size 65536

Total time 17 min

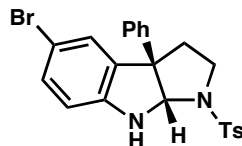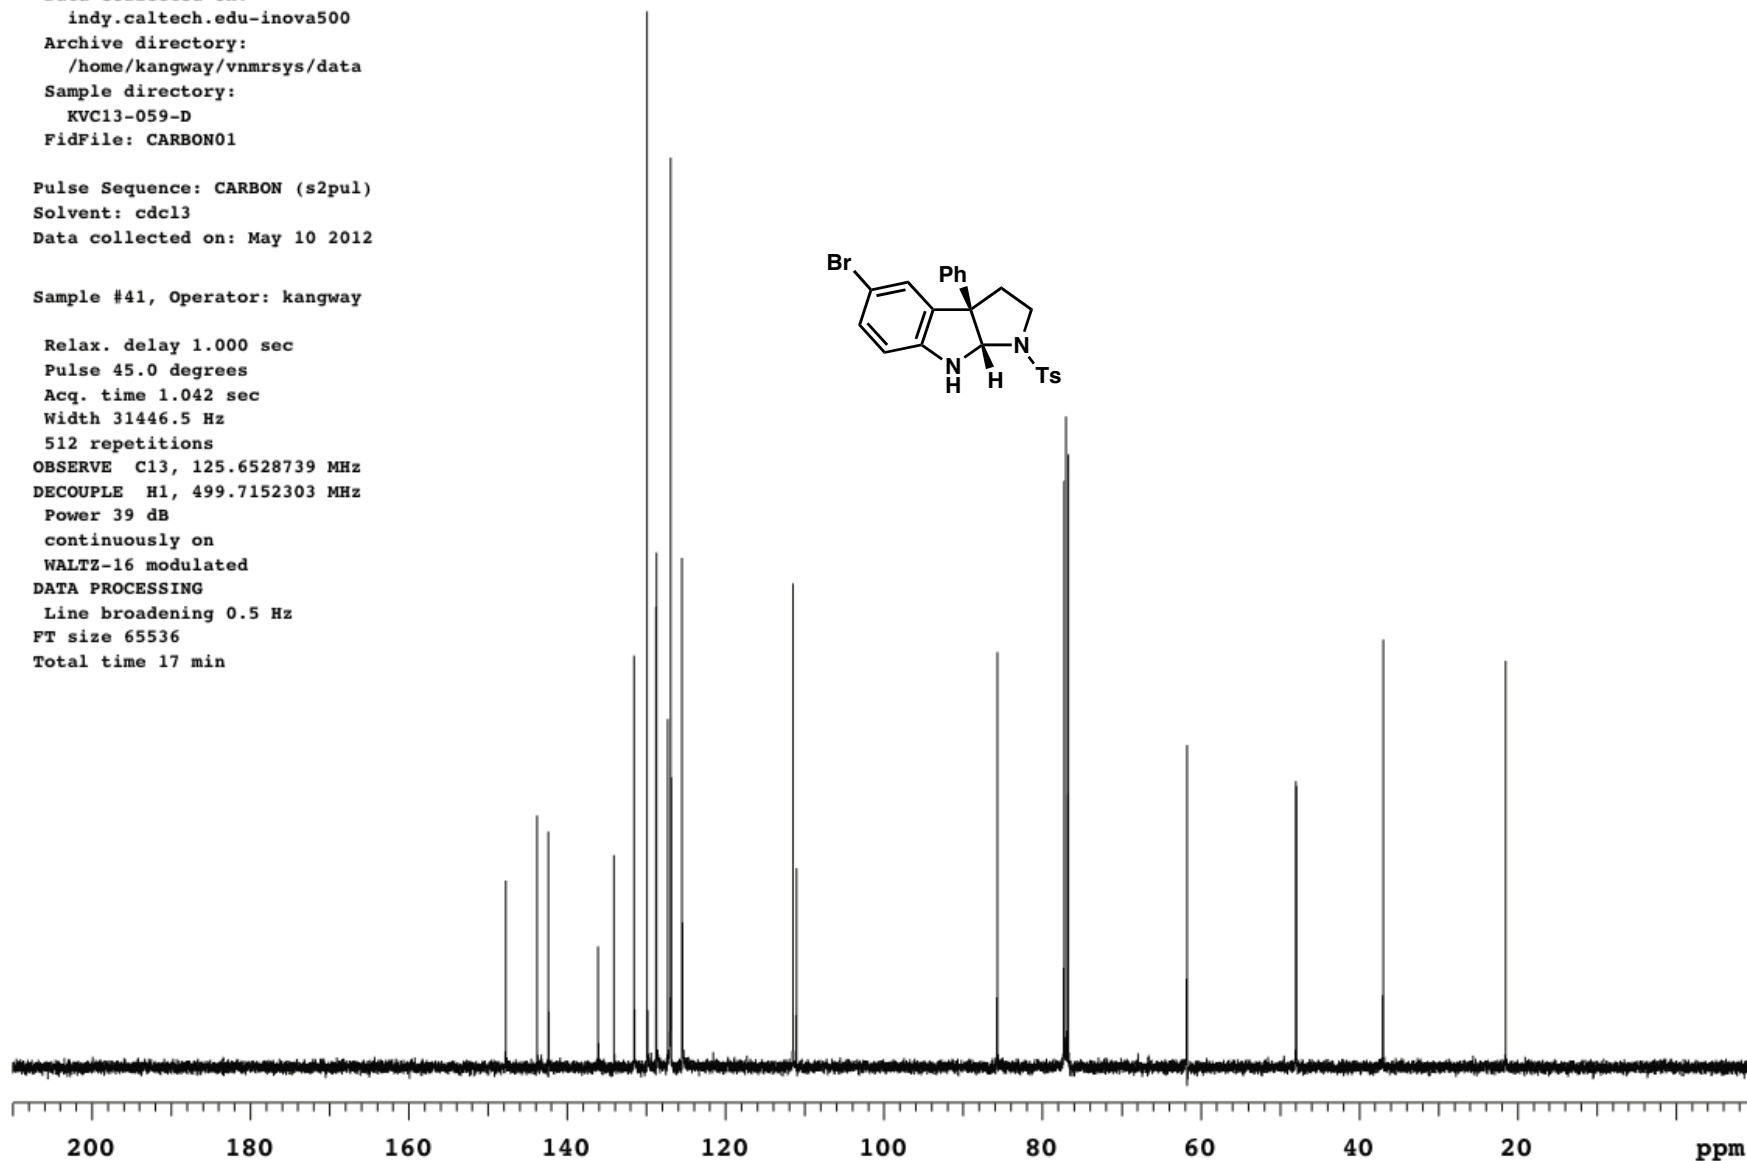

KVC13-069-D

Sample Name:  
KVC13-069-D  
Data Collected on:  
indy.caltech.edu-inova500  
Archive directory:  
/home/kangway/vnmrsys/data  
Sample directory:  
KVC13-069-D  
FidFile: PROTON01

Pulse Sequence: PROTON (s2pul)  
Solvent: cdcl3  
Data collected on: May 12 2012

Sample #43, Operator: kangway

Relax. delay 5.000 sec  
Pulse 45.0 degrees  
Acq. time 2.500 sec  
Width 8000.0 Hz  
32 repetitions  
OBSERVE H1, 499.7127408 MHz  
DATA PROCESSING  
Line broadening 0.2 Hz  
FT size 65536  
Total time 4 min 0 sec

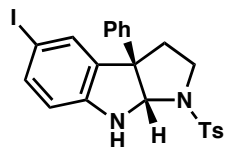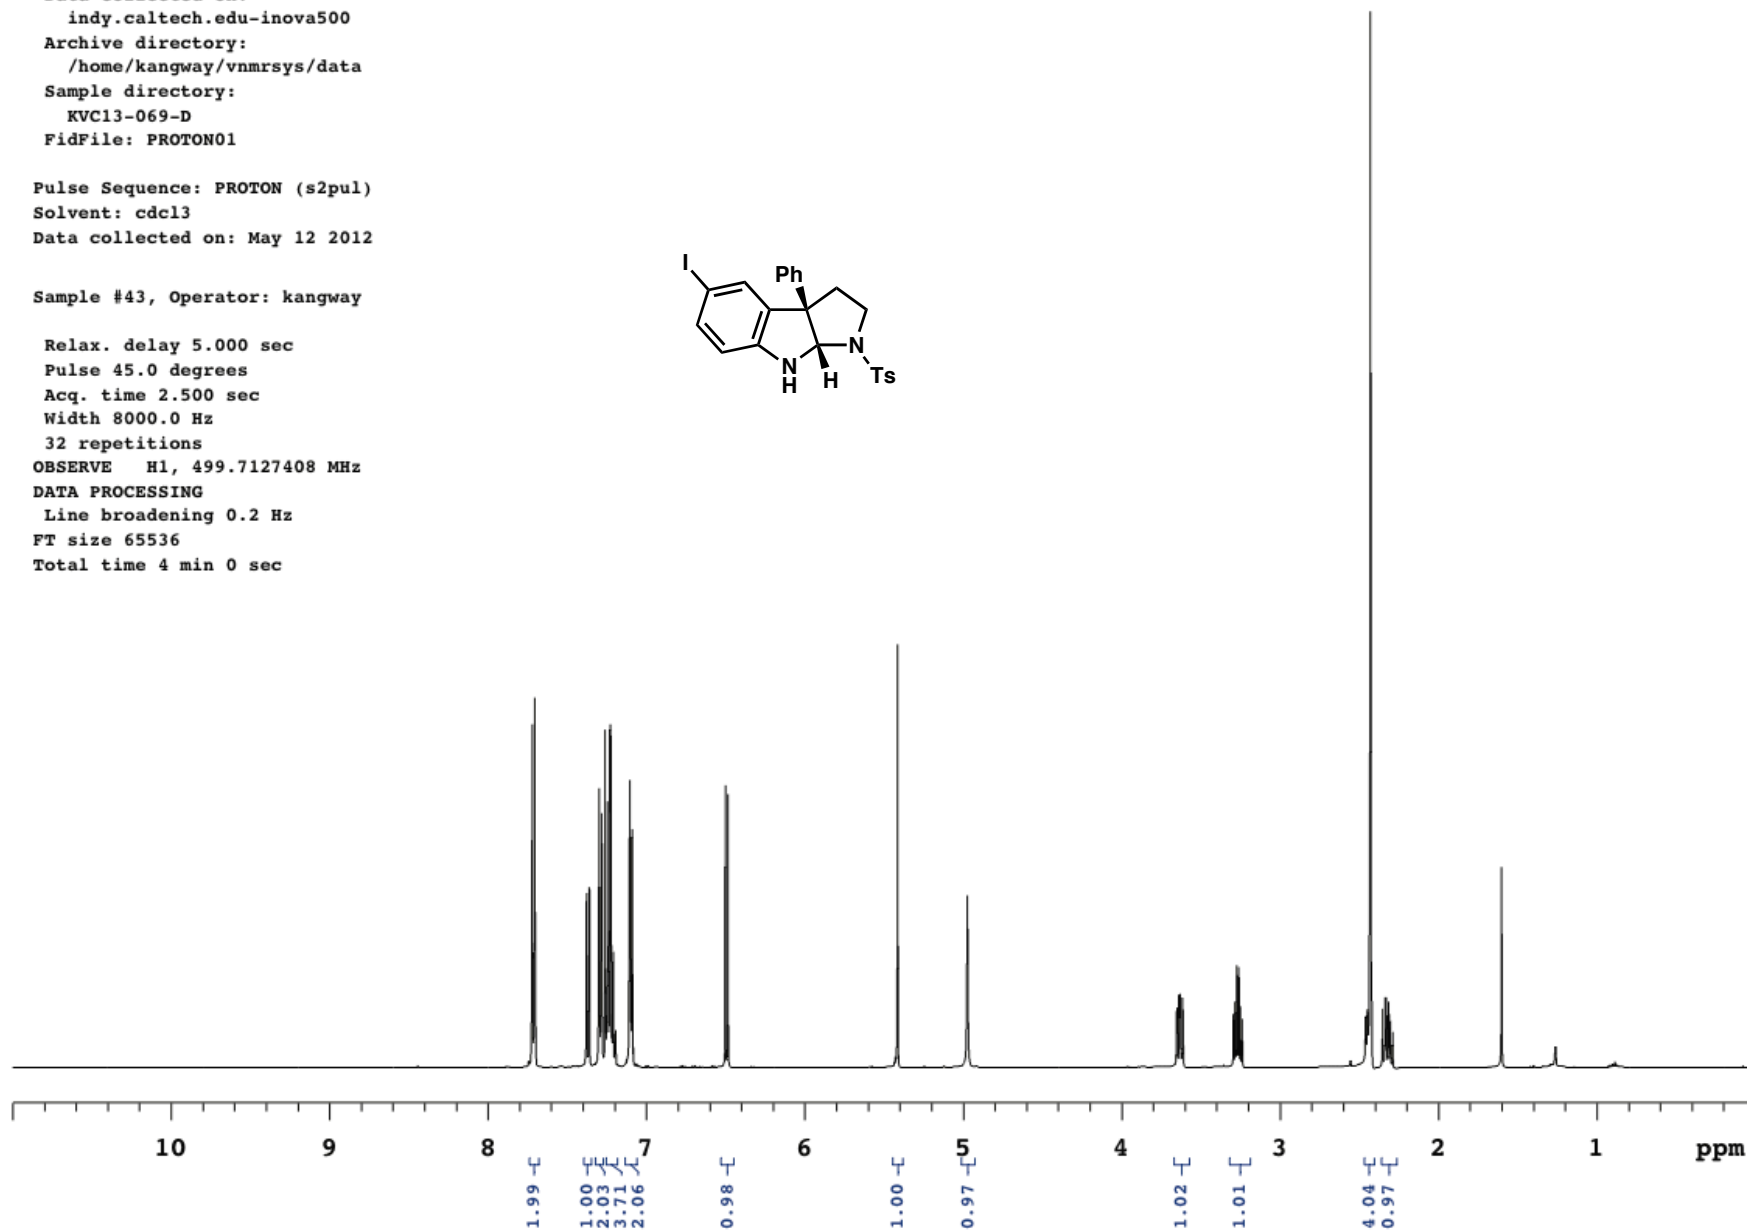

KVC13-069-D

Sample Name:

KVC13-069-D

Data Collected on:

indy.caltech.edu-inova500

Archive directory:

/home/kangway/vnmrsys/data

Sample directory:

KVC13-069-D

FidFile: CARBON01

Pulse Sequence: CARBON (s2pul)

Solvent: cdcl3

Data collected on: May 12 2012

Sample #43, Operator: kangway

Relax. delay 1.000 sec

Pulse 45.0 degrees

Acq. time 1.042 sec

Width 31446.5 Hz

512 repetitions

OBSERVE C13, 125.6528739 MHz

DECOUPLE H1, 499.7152303 MHz

Power 39 dB

continuously on

WALTZ-16 modulated

DATA PROCESSING

Line broadening 0.5 Hz

FT size 65536

Total time 17 min

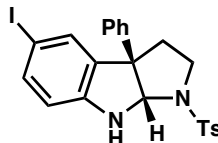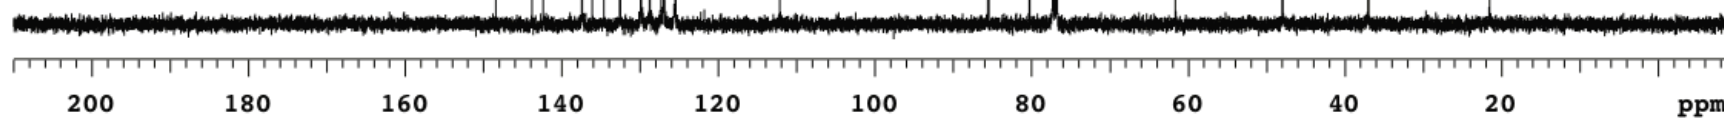

KVC13-059-E

Sample Name:

KVC13-059-E

Data Collected on:

indy.caltech.edu-inova500

Archive directory:

/home/kangway/vnmrsys/data

Sample directory:

KVC13-059-E

FidFile: PROTON01

Pulse Sequence: PROTON (s2pul)

Solvent: cdcl3

Data collected on: May 10 2012

Sample #42, Operator: kangway

Relax. delay 5.000 sec

Pulse 45.0 degrees

Acq. time 2.500 sec

Width 8000.0 Hz

32 repetitions

OBSERVE H1, 499.7127410 MHz

DATA PROCESSING

Line broadening 0.2 Hz

FT size 65536

Total time 4 min 0 sec

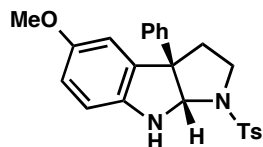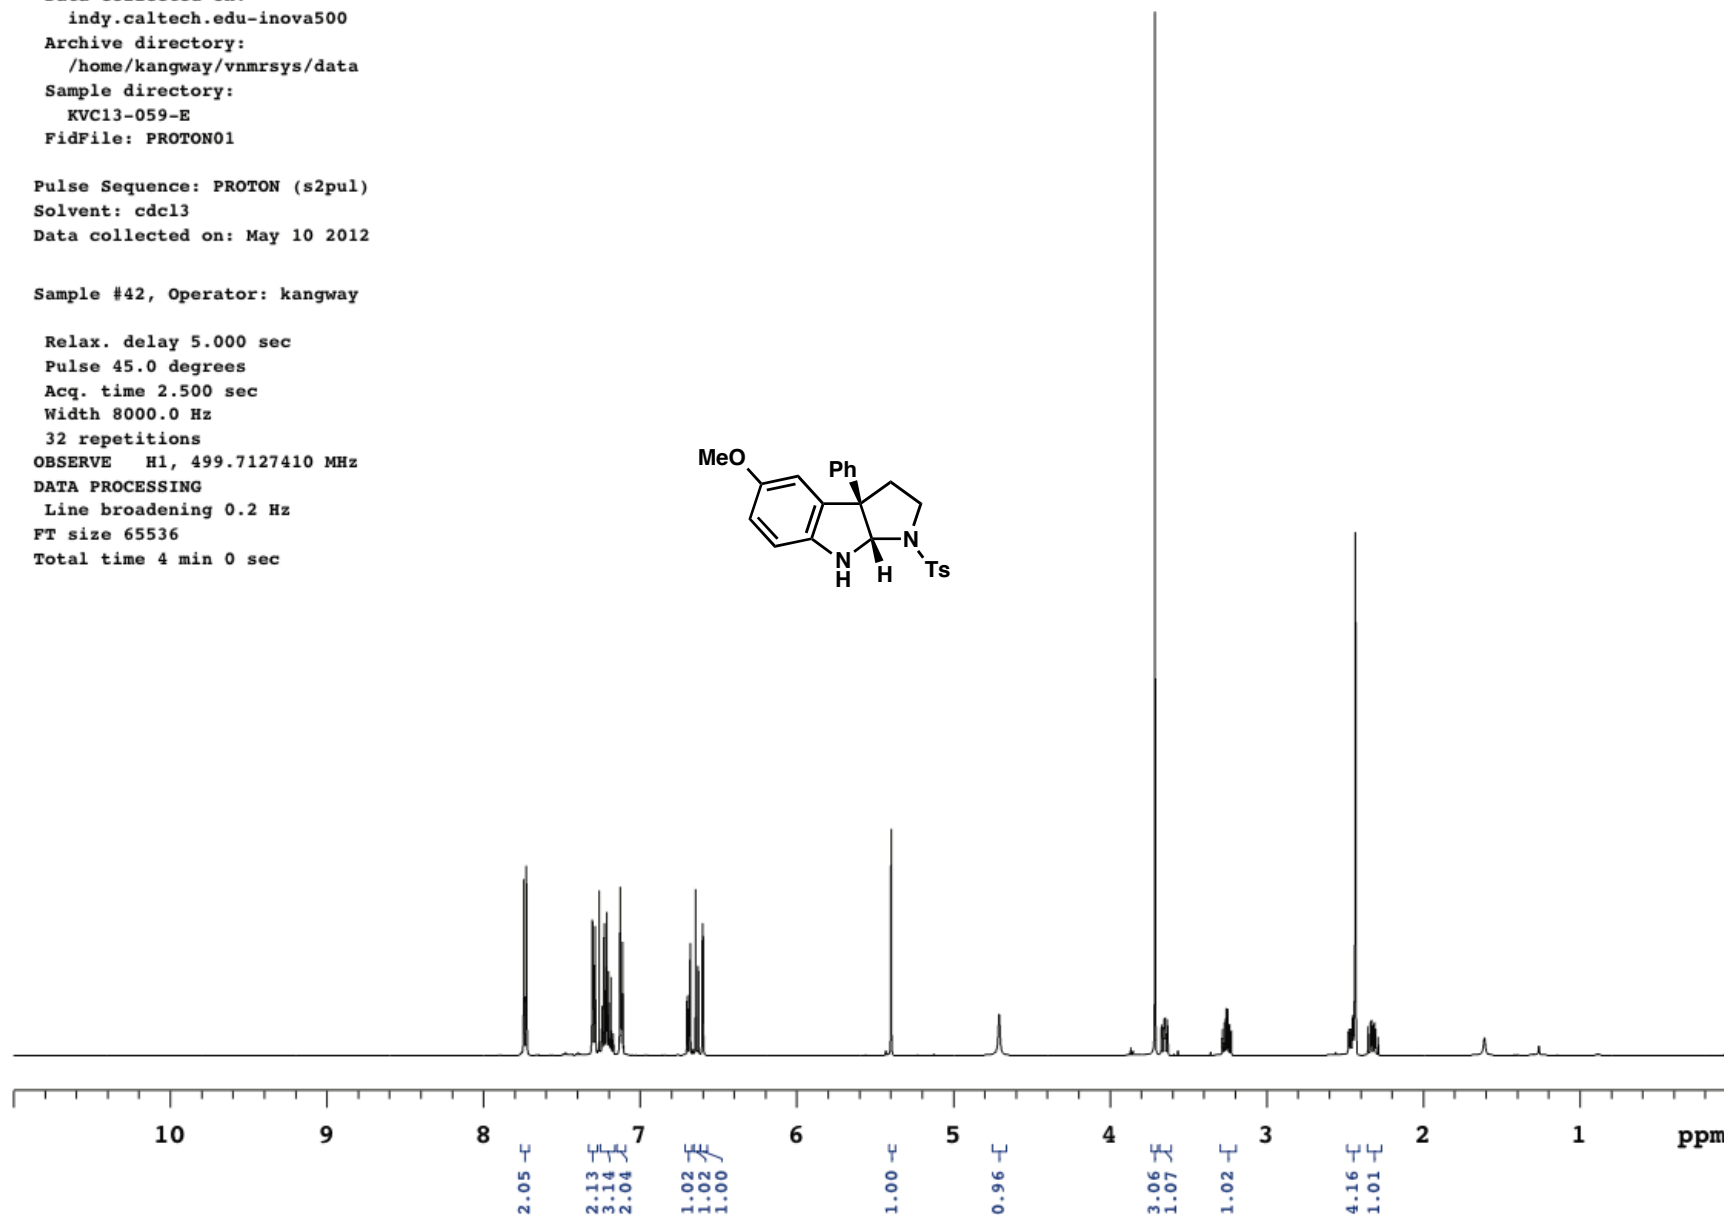

KVC13-059-E

Sample Name:

KVC13-059-E

Data Collected on:

indy.caltech.edu-inova500

Archive directory:

/home/kangway/vnmrsys/data

Sample directory:

KVC13-059-E

FidFile: CARBON01

Pulse Sequence: CARBON (s2pul)

Solvent: cdcl3

Data collected on: May 10 2012

Sample #42, Operator: kangway

Relax. delay 1.000 sec

Pulse 45.0 degrees

Acq. time 1.042 sec

Width 31446.5 Hz

512 repetitions

OBSERVE C13, 125.6528729 MHz

DECOUPLE H1, 499.7152303 MHz

Power 39 dB

continuously on

WALTZ-16 modulated

DATA PROCESSING

Line broadening 0.5 Hz

FT size 65536

Total time 17 min

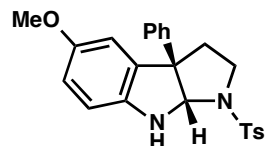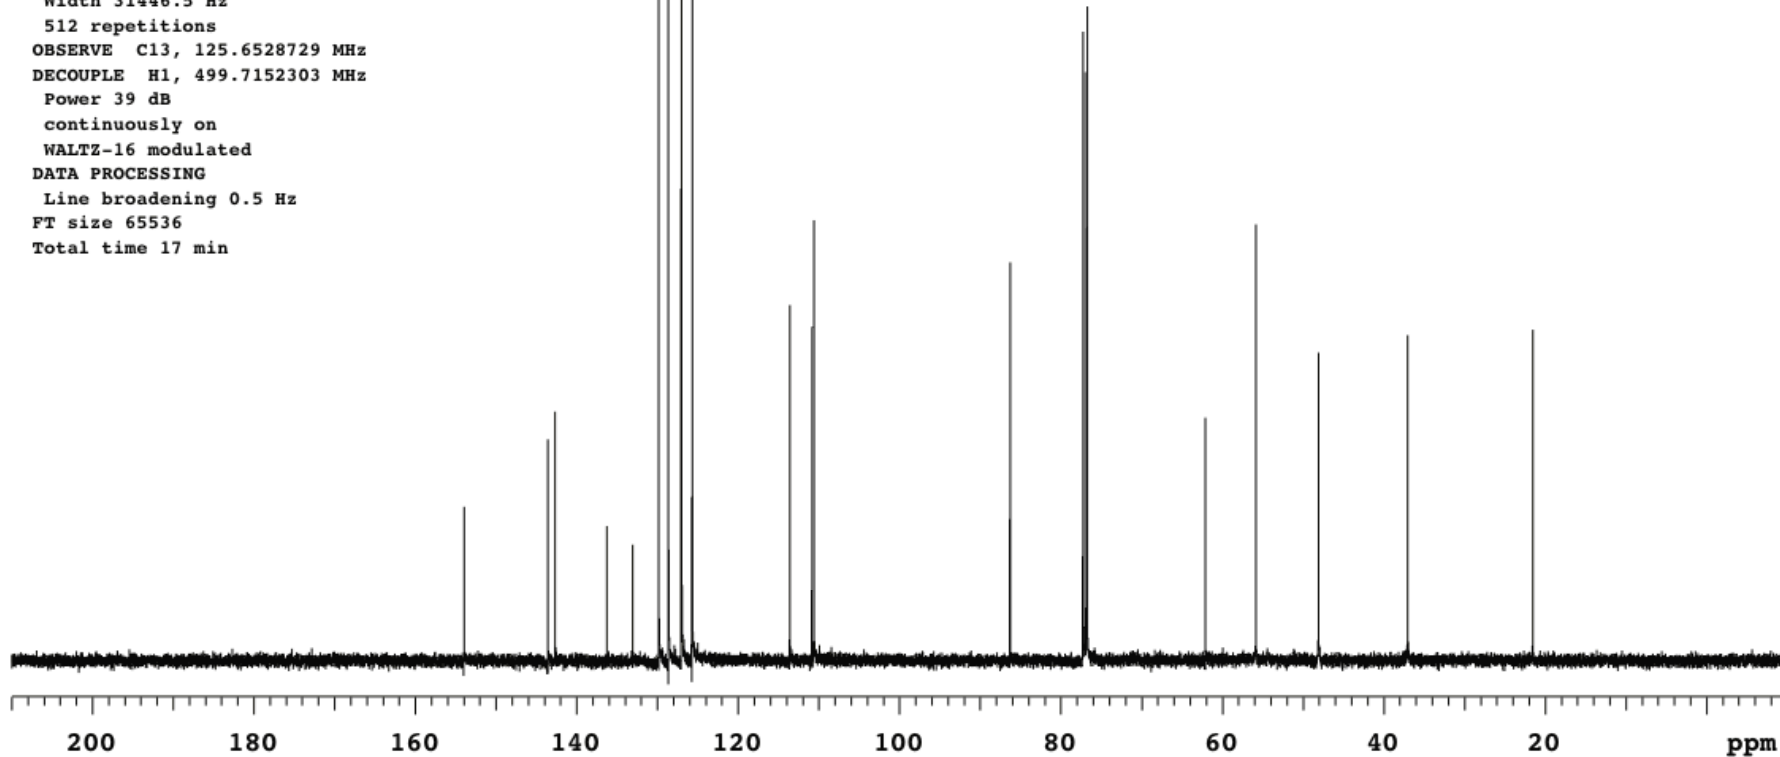



KVC13-037A

Sample Name:  
KVC13-037A  
Data Collected on:  
indy.caltech.edu-inova500  
Archive directory:  
/home/kangway/vnmrsys/data  
Sample directory:  
KVC13-037A  
FidFile: PROTON01

Pulse Sequence: PROTON (s2pul)  
Solvent: cdcl3  
Data collected on: May 3 2012

Sample #47, Operator: kangway

Relax. delay 1.000 sec  
Pulse 45.0 degrees  
Acq. time 2.500 sec  
Width 8000.0 Hz  
32 repetitions  
OBSERVE H1, 499.7127405 MHz  
DATA PROCESSING  
Line broadening 0.2 Hz  
FT size 65536  
Total time 1 min 52 sec

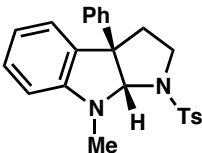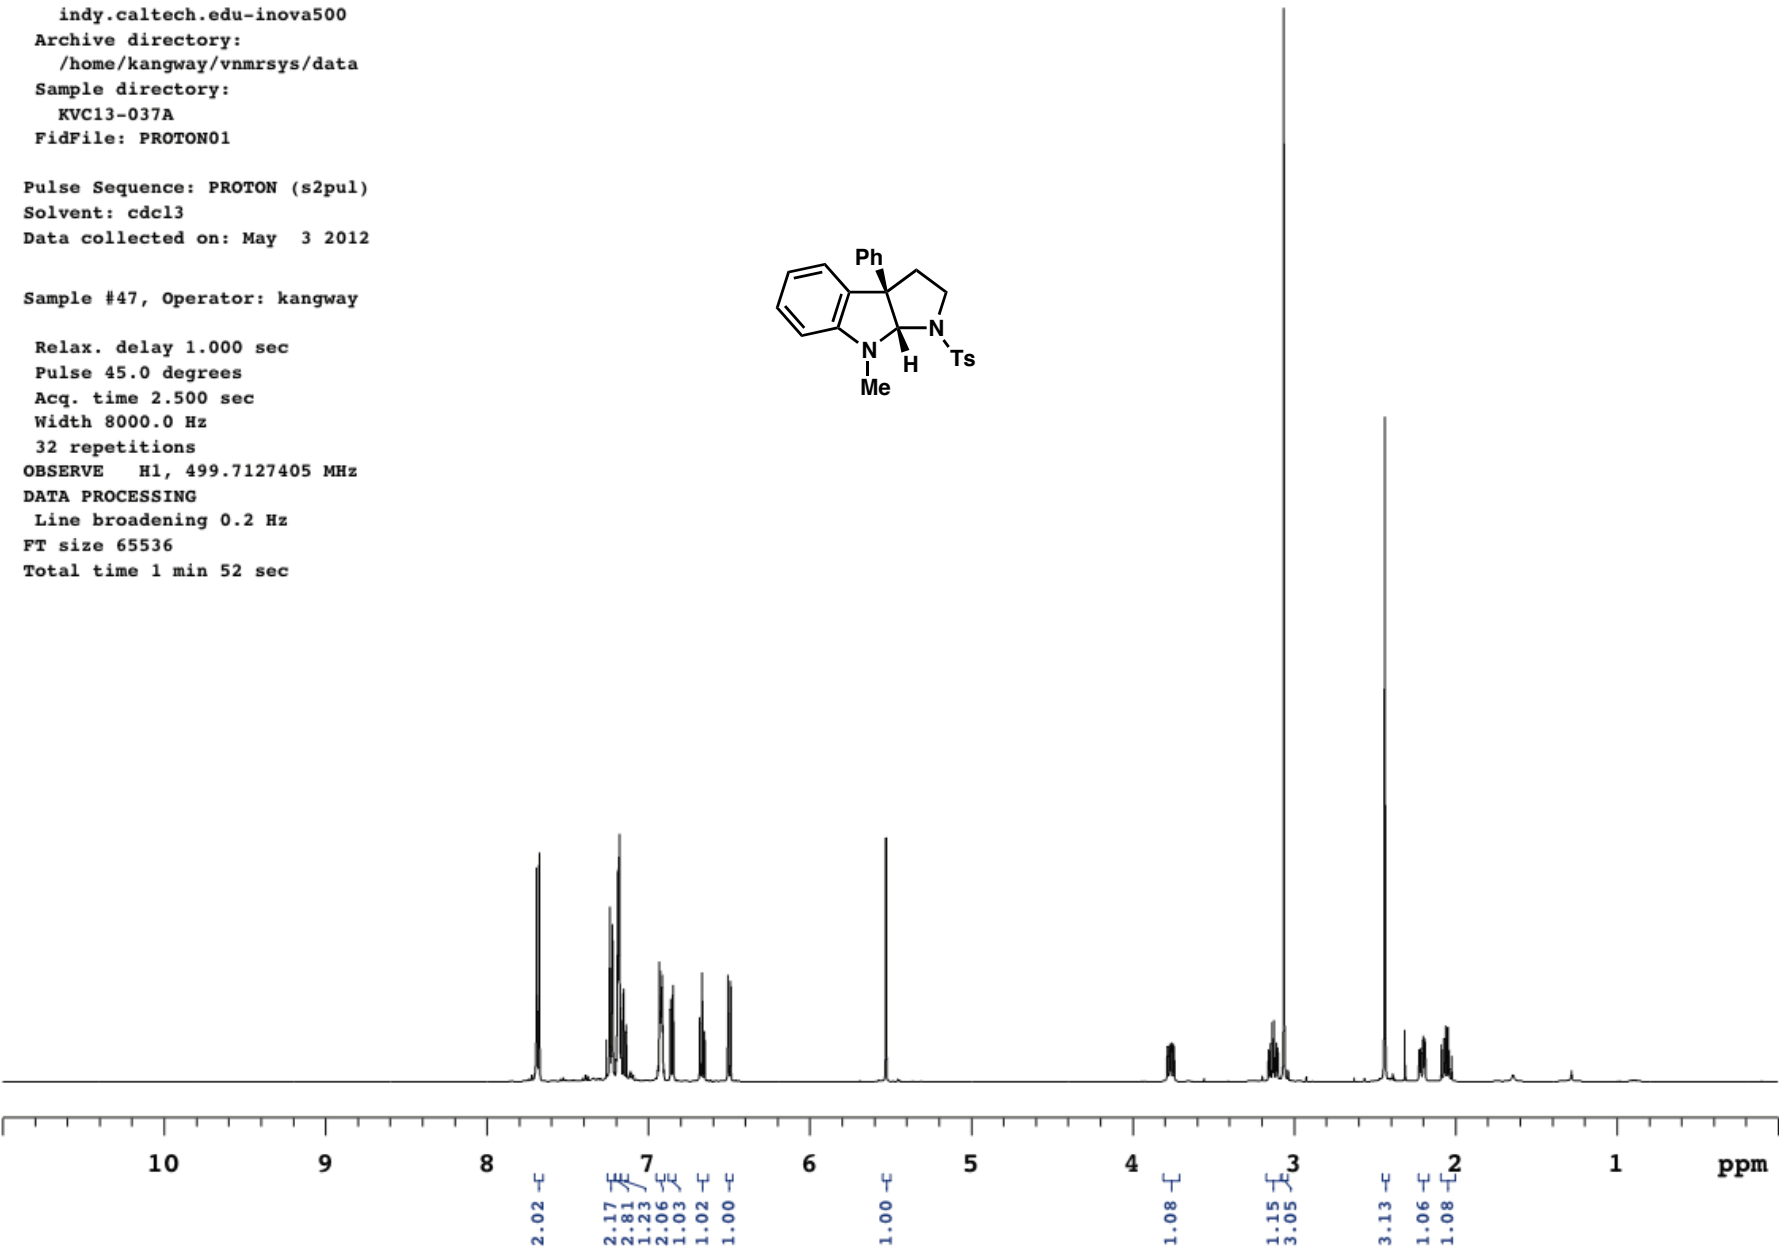

KVC13-037A

Sample Name:

KVC13-037A

Data Collected on:

indy.caltech.edu-inova500

Archive directory:

/home/kangway/vnmrsys/data

Sample directory:

KVC13-037A

FidFile: CARBON01

Pulse Sequence: CARBON (s2pul)

Solvent: cdcl3

Data collected on: May 3 2012

Sample #47, Operator: kangway

Relax. delay 1.000 sec

Pulse 45.0 degrees

Acq. time 1.042 sec

Width 31446.5 Hz

1000 repetitions

OBSERVE C13, 125.6528806 MHz

DECOUPLE H1, 499.7152303 MHz

Power 39 dB

continuously on

WALTZ-16 modulated

DATA PROCESSING

Line broadening 0.5 Hz

FT size 65536

Total time 34 min

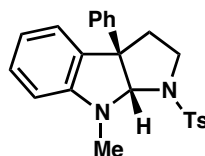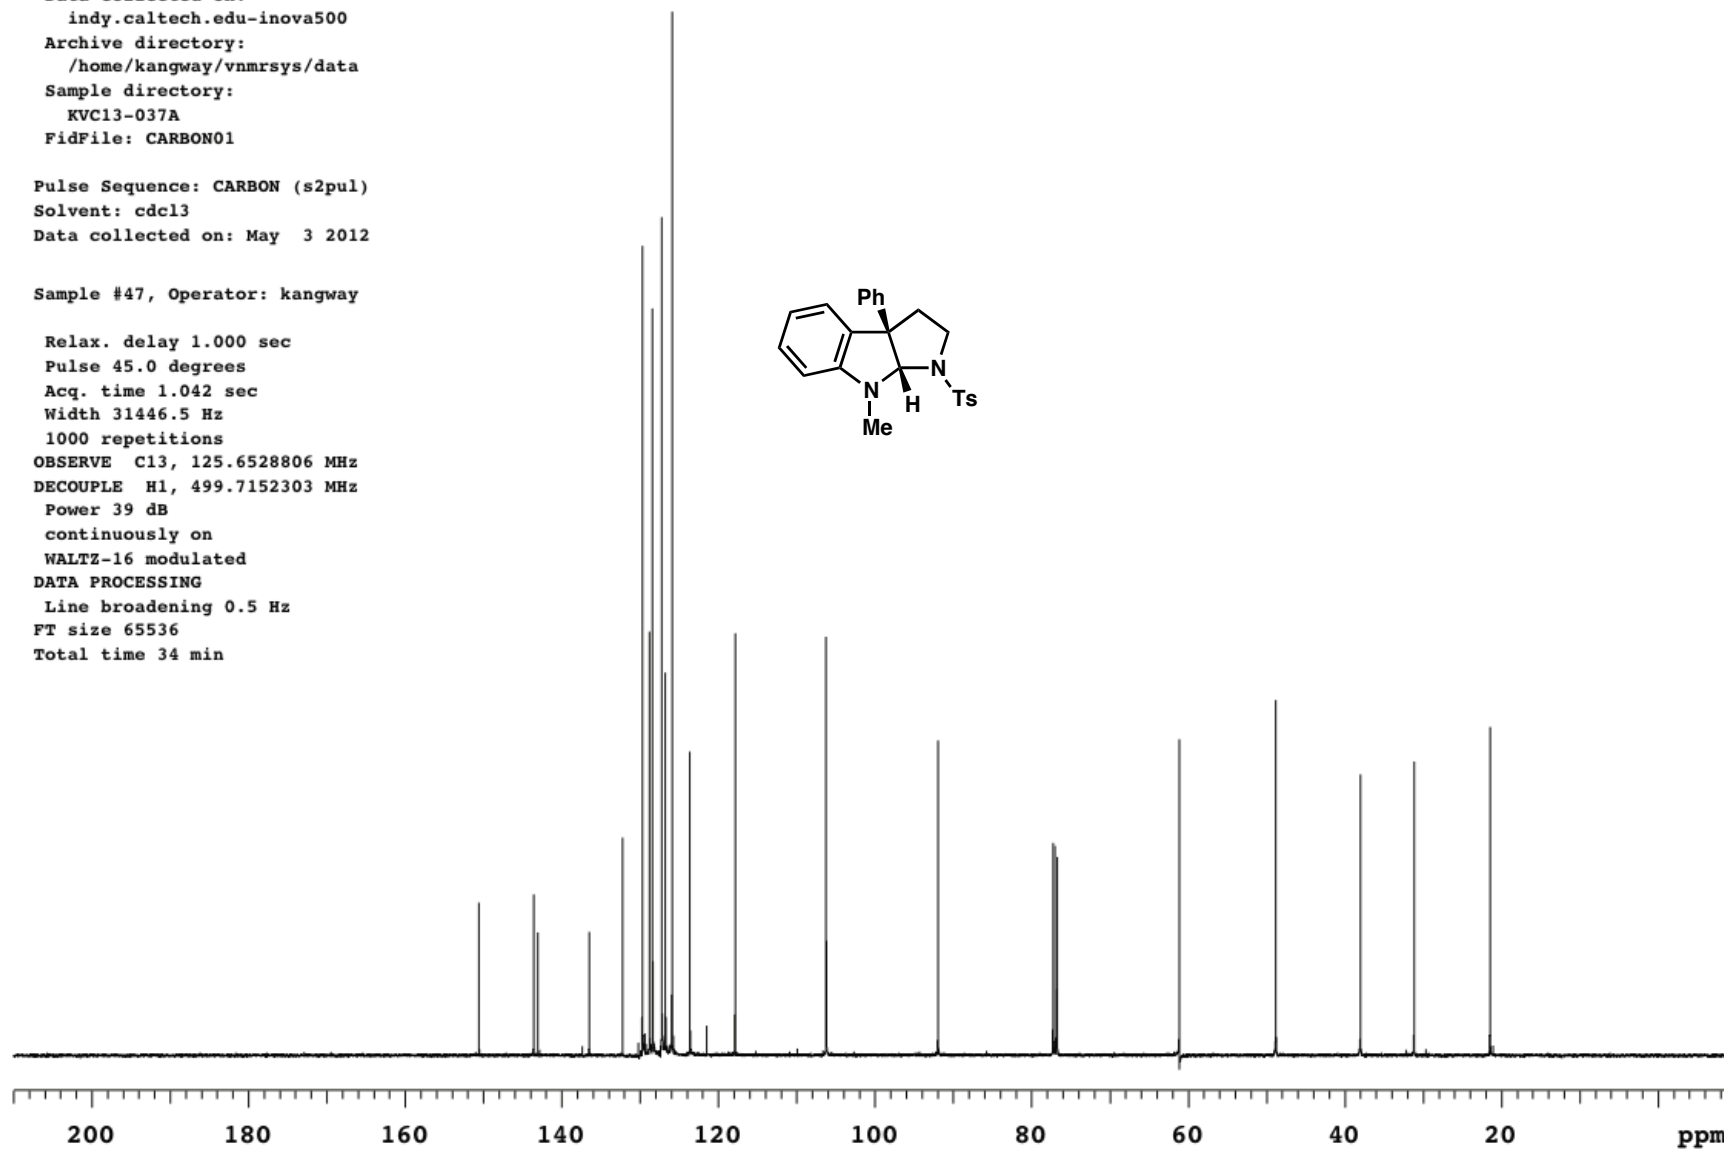

Sample Name:  
MEK4134-C  
Data Collected on:  
indy.caltech.edu-inova500  
Archive directory:  
/home/mkieffer/vnmrsys/data  
Sample directory:  
MEK4134-C  
FidFile: PROTON01

Pulse Sequence: PROTON (s2pul)  
Solvent: cdcl3  
Data collected on: Jun 12 2012

Sample #40, Operator: mkieffer

Relax. delay 5.000 sec  
Pulse 45.0 degrees  
Acq. time 2.500 sec  
Width 8000.0 Hz  
32 repetitions  
OBSERVE H1, 499.7127408 MHz  
DATA PROCESSING  
Line broadening 0.2 Hz  
FT size 65536  
Total time 4 min 0 sec

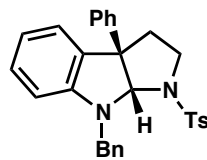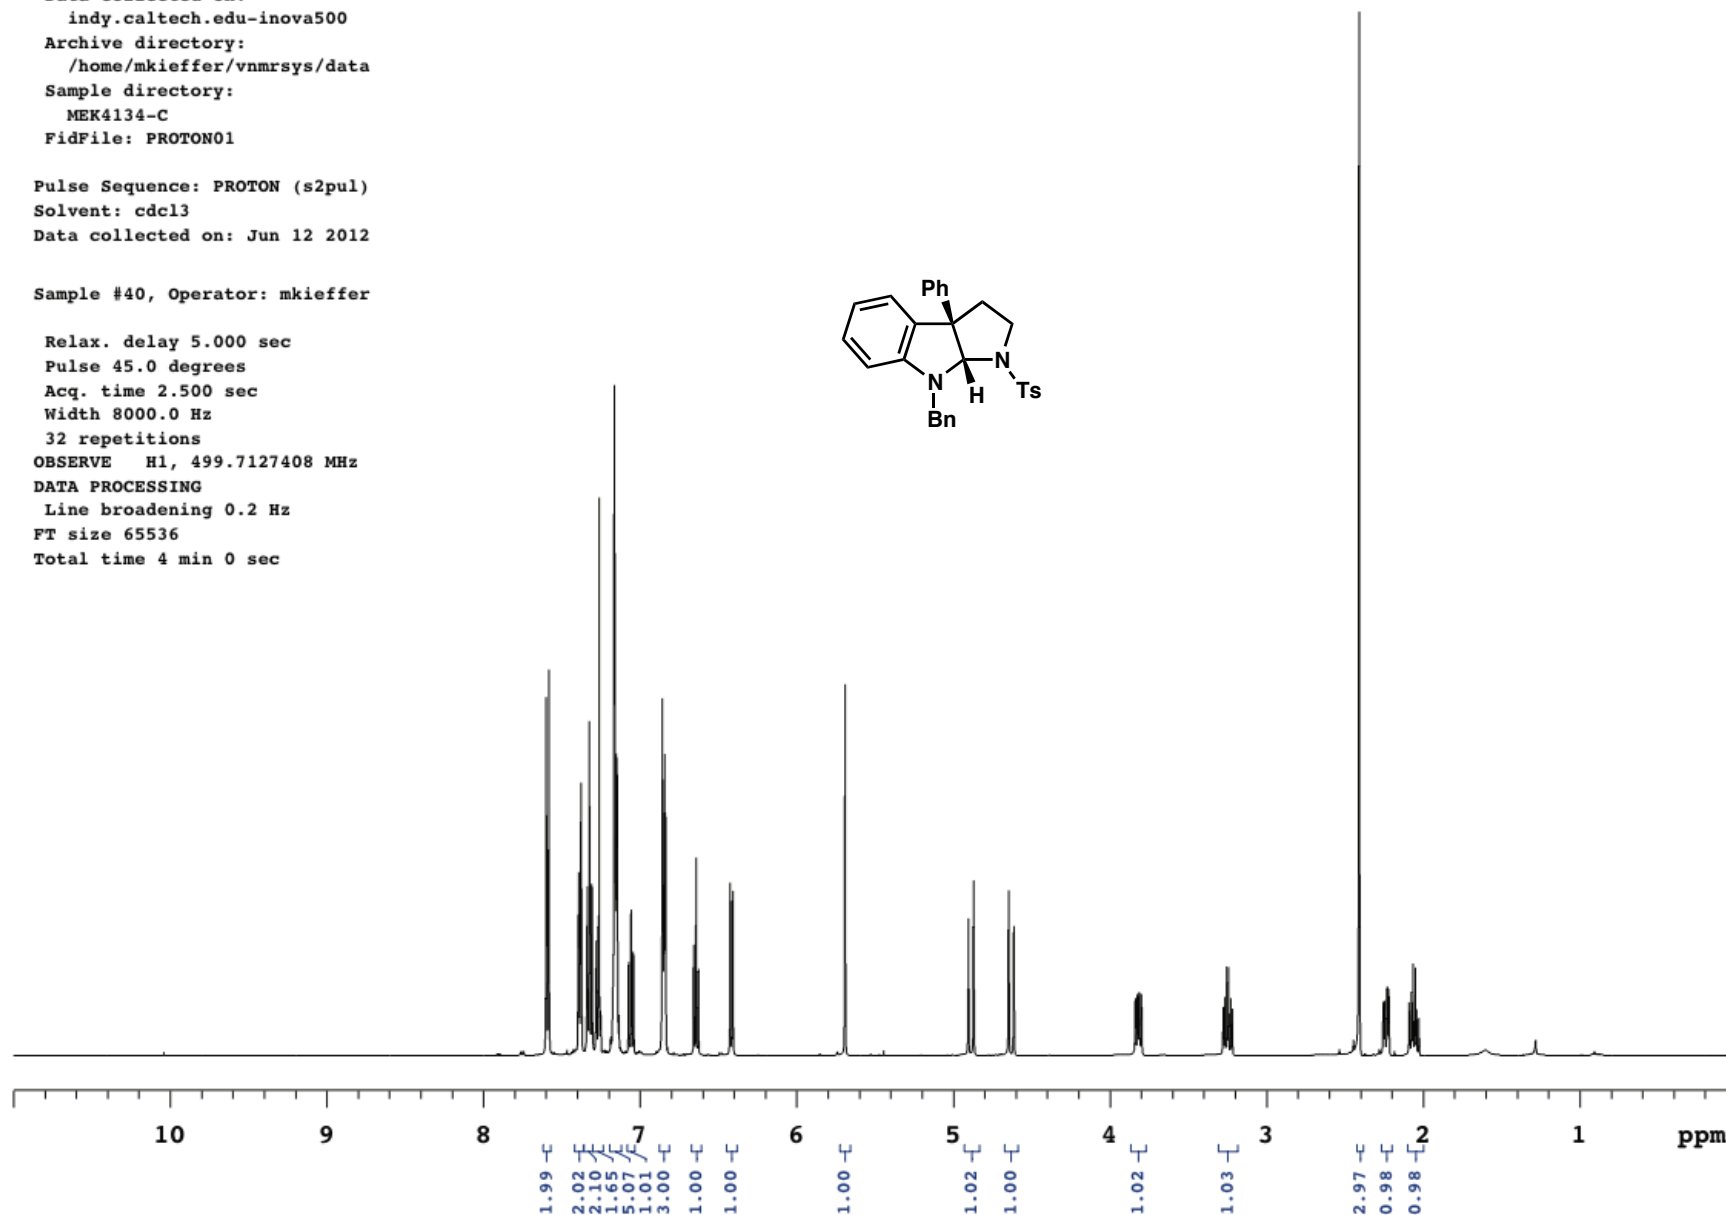

Sample Name:  
MEK4134-C  
Data Collected on:  
indy.caltech.edu-inova500  
Archive directory:  
/home/mkieffer/vnmrsys/data  
Sample directory:  
MEK4134-C  
FidFile: CARBON01

Pulse Sequence: CARBON (s2pul)  
Solvent: cdcl3  
Data collected on: Jun 12 2012

Sample #40, Operator: mkieffer

Relax. delay 1.000 sec  
Pulse 45.0 degrees  
Acq. time 1.042 sec  
Width 31446.5 Hz  
512 repetitions  
OBSERVE C13, 125.6528767 MHz  
DECOUPLE H1, 499.7152303 MHz  
Power 39 dB  
continuously on  
WALTZ-16 modulated  
DATA PROCESSING  
Line broadening 0.5 Hz  
FT size 65536  
Total time 17 min

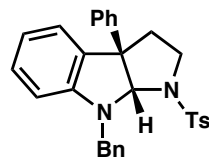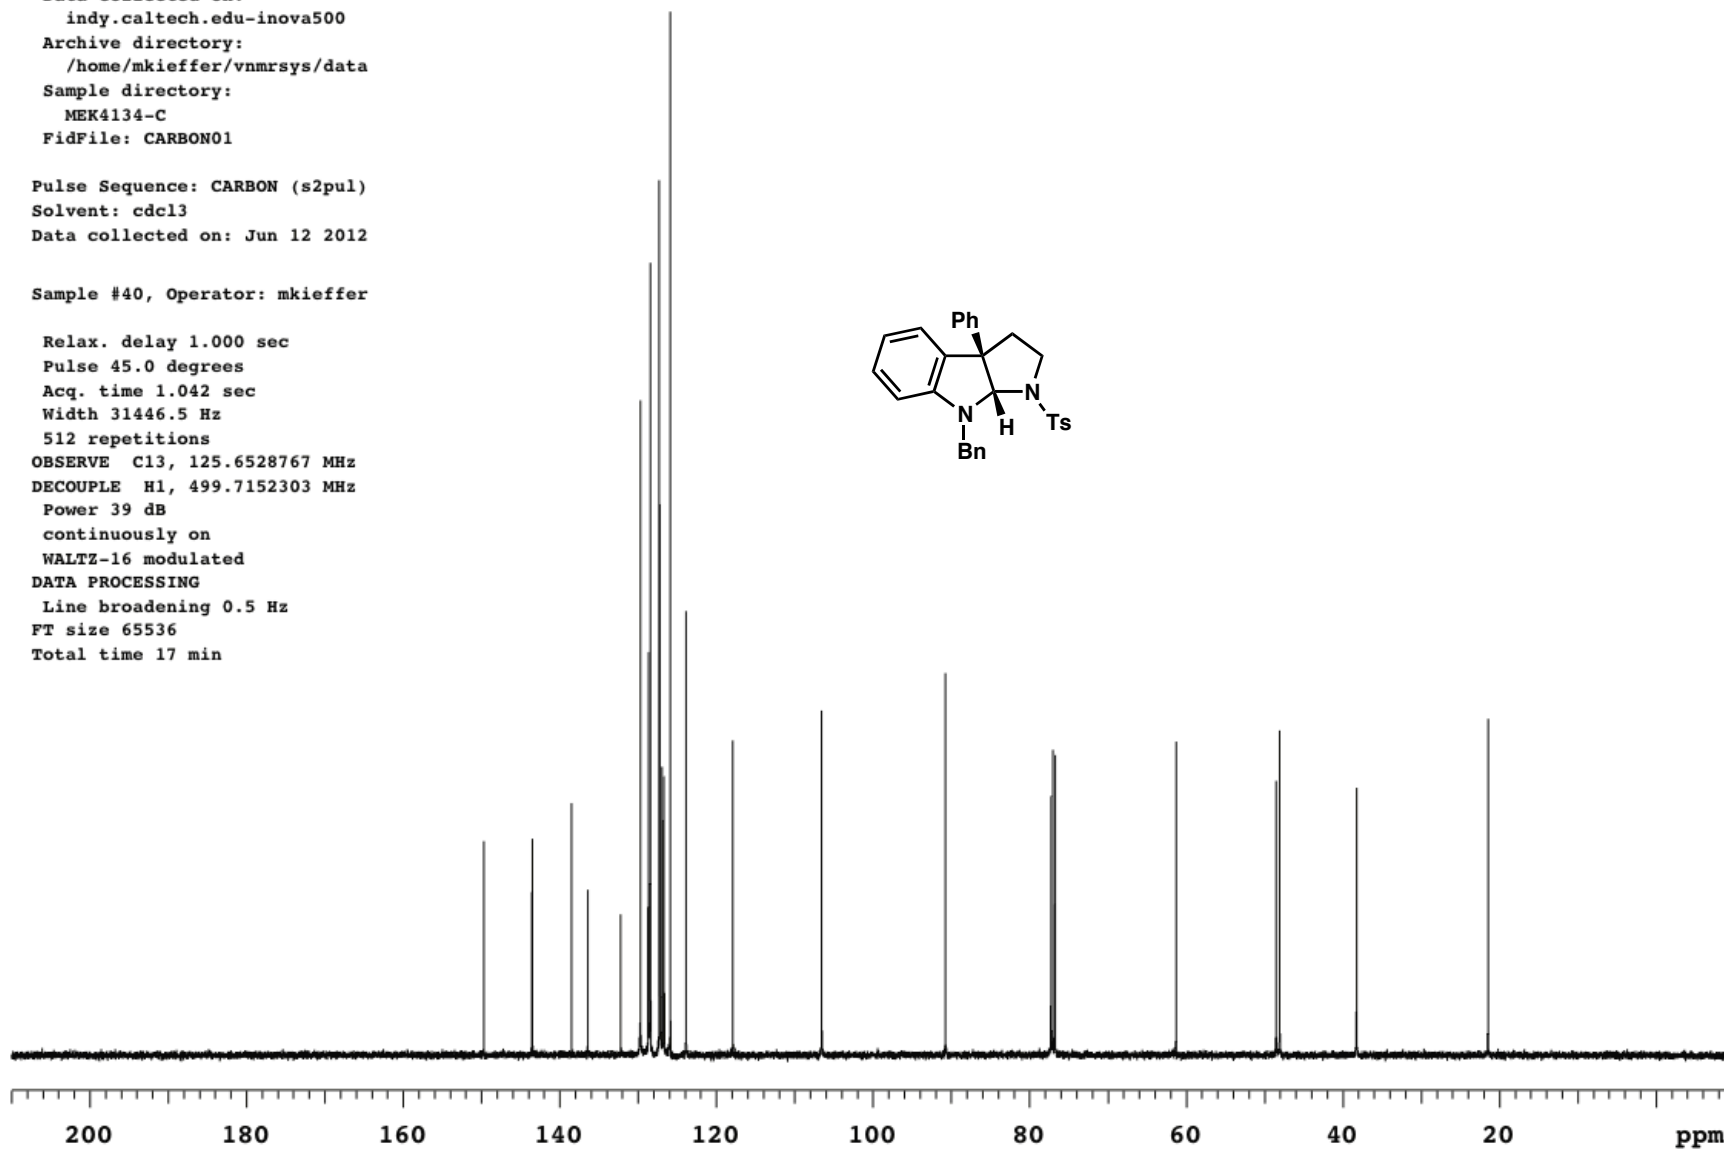

Sample Name:  
MEK4112-B  
Data Collected on:  
indy.caltech.edu-inova500  
Archive directory:  
/home/mkieffer/vnmrsys/data  
Sample directory:  
MEK4112-B  
FidFile: PROTON01

Pulse Sequence: PROTON (s2pul)  
Solvent: cdcl3  
Data collected on: May 25 2012

Sample #11, Operator: mkieffer

Relax. delay 5.000 sec  
Pulse 45.0 degrees  
Acq. time 2.500 sec  
Width 8000.0 Hz  
32 repetitions  
OBSERVE H1, 499.7127408 MHz  
DATA PROCESSING  
Line broadening 0.2 Hz  
FT size 65536  
Total time 4 min 0 sec

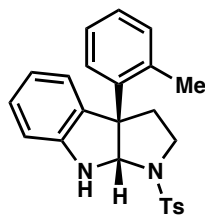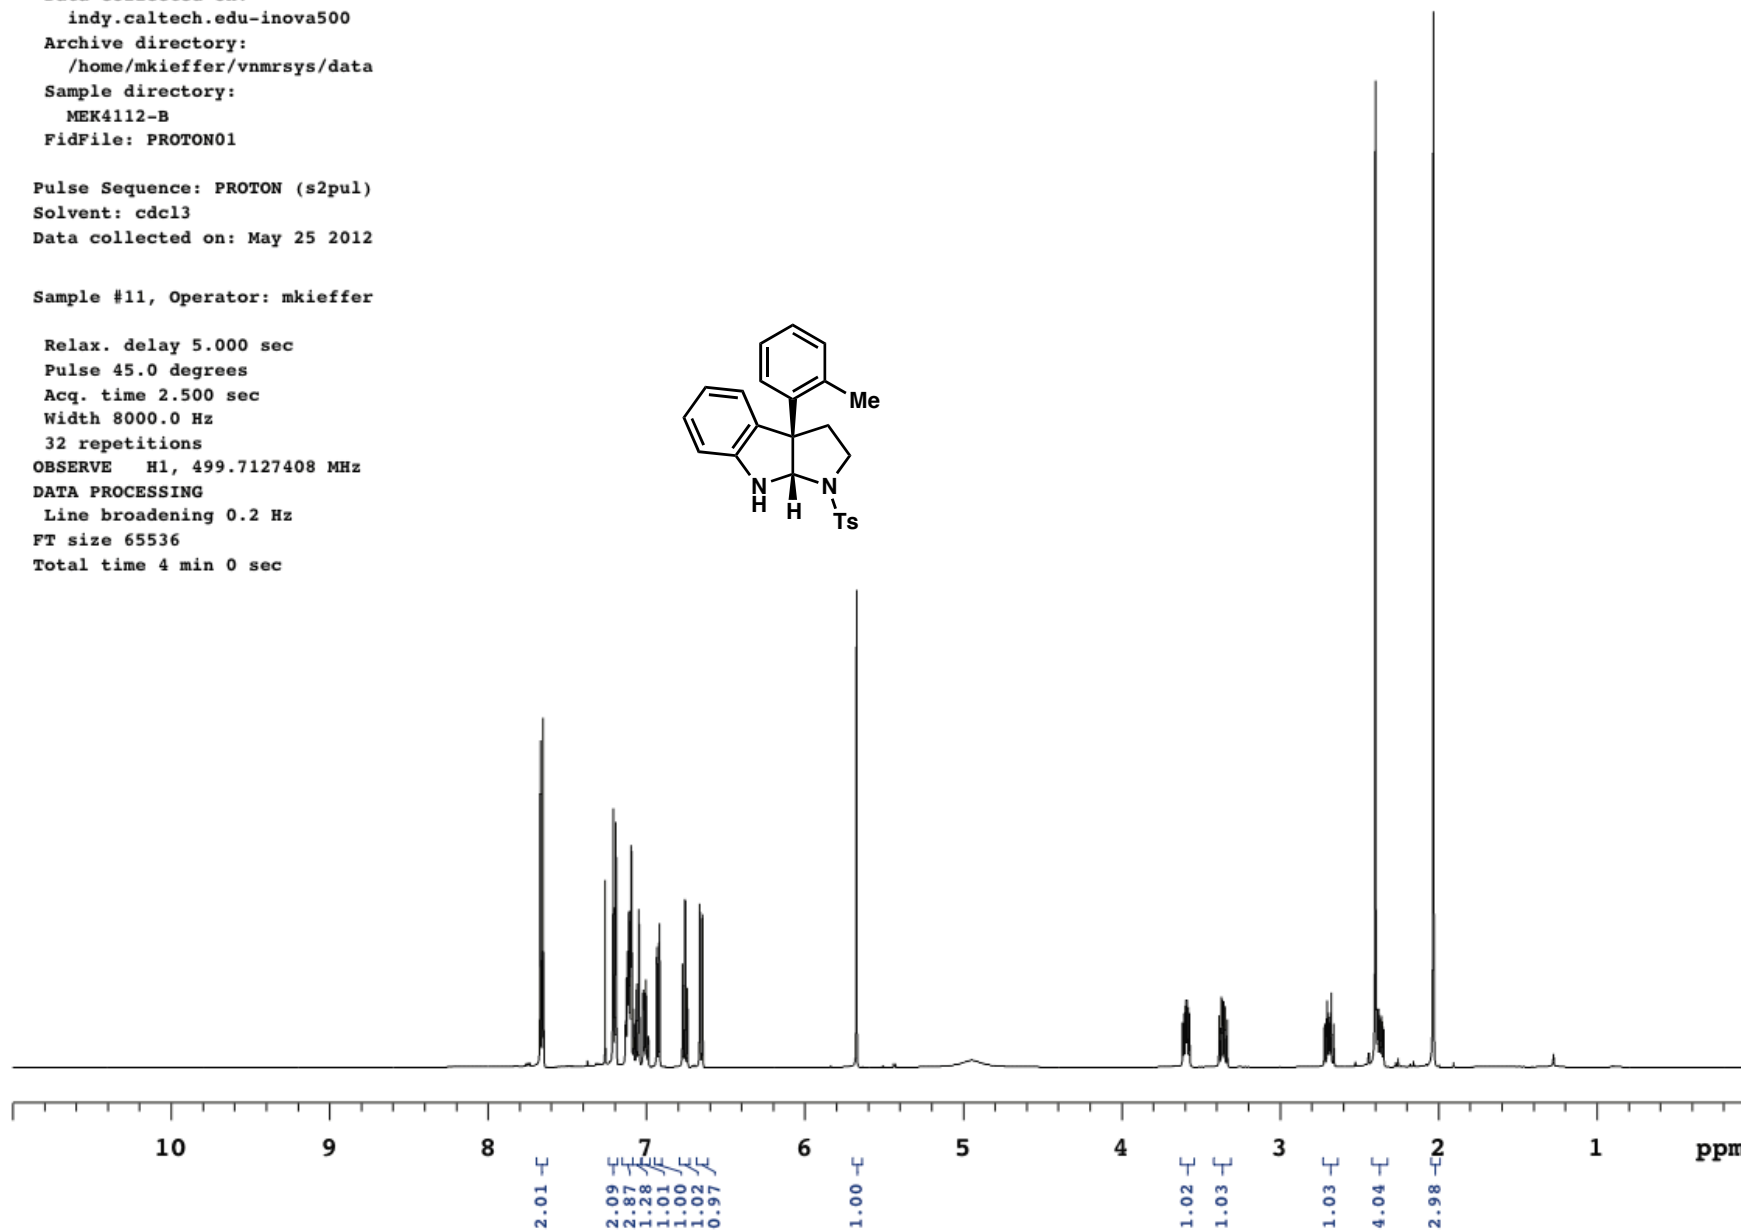

Sample Name:  
MEK4112-B  
Data Collected on:  
indy.caltech.edu-inova500  
Archive directory:  
/home/mkieffer/vnmrsys/data  
Sample directory:  
MEK4112-B  
FidFile: CARBON01

Pulse Sequence: CARBON (s2pul)  
Solvent: cdcl3  
Data collected on: May 25 2012

Sample #11, Operator: mkieffer

Relax. delay 1.000 sec  
Pulse 45.0 degrees  
Acq. time 1.042 sec  
Width 31446.5 Hz  
512 repetitions  
OBSERVE C13, 125.6528787 MHz  
DECOUPLE H1, 499.7152303 MHz  
Power 39 dB  
continuously on  
WALTZ-16 modulated  
DATA PROCESSING  
Line broadening 0.5 Hz  
FT size 65536  
Total time 17 min

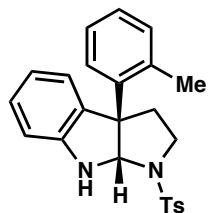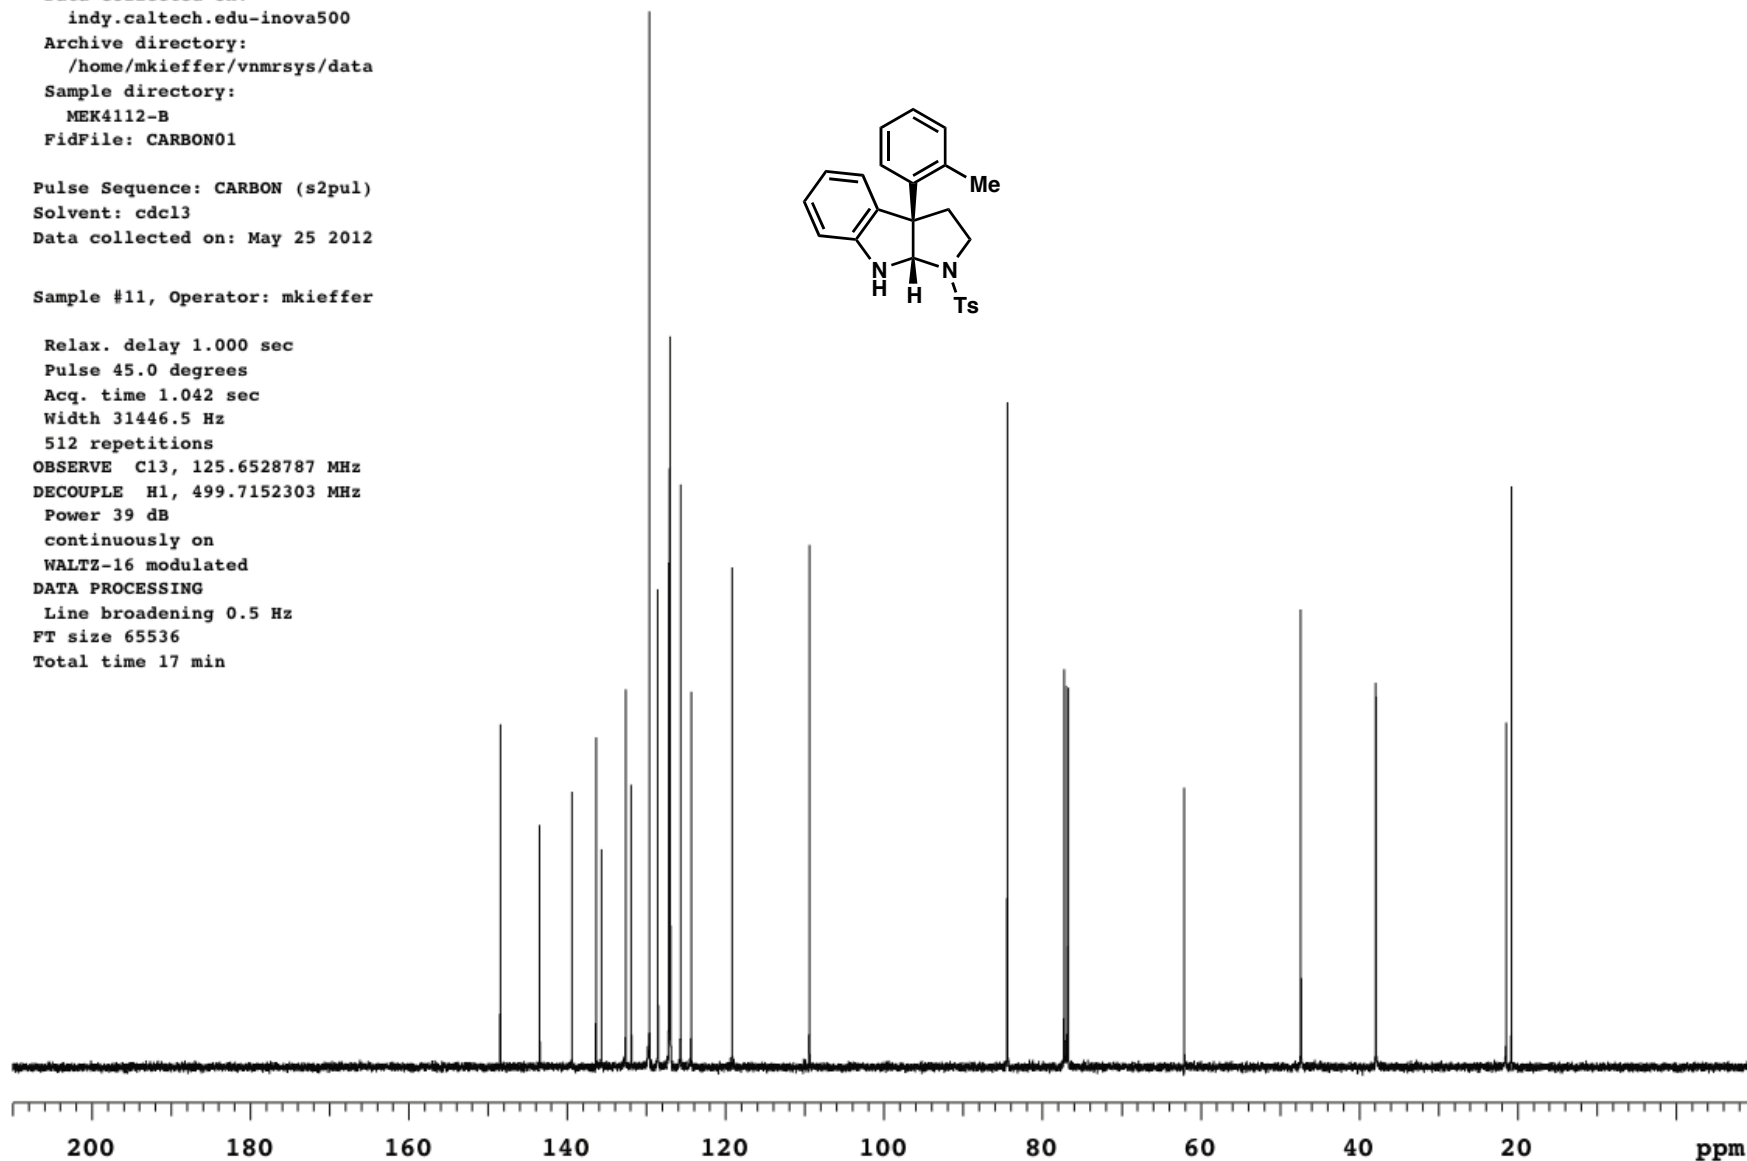

MEK4105A

Sample Name:

MEK4105A

Data Collected on:

indy.caltech.edu-inova500

Archive directory:

/home/mkieffer/vnmrSYS/data

Sample directory:

MEK4105A

FidFile: PROTON01

Pulse Sequence: PROTON (s2pul)

Solvent: cdcl3

Data collected on: Apr 24 2012

Sample #14, Operator: mkieffer

Relax. delay 5.000 sec

Pulse 45.0 degrees

Acq. time 2.500 sec

Width 8000.0 Hz

32 repetitions

OBSERVE H1, 499.7127408 MHz

DATA PROCESSING

Line broadening 0.2 Hz

FT size 65536

Total time 4 min 0 sec

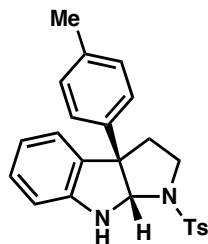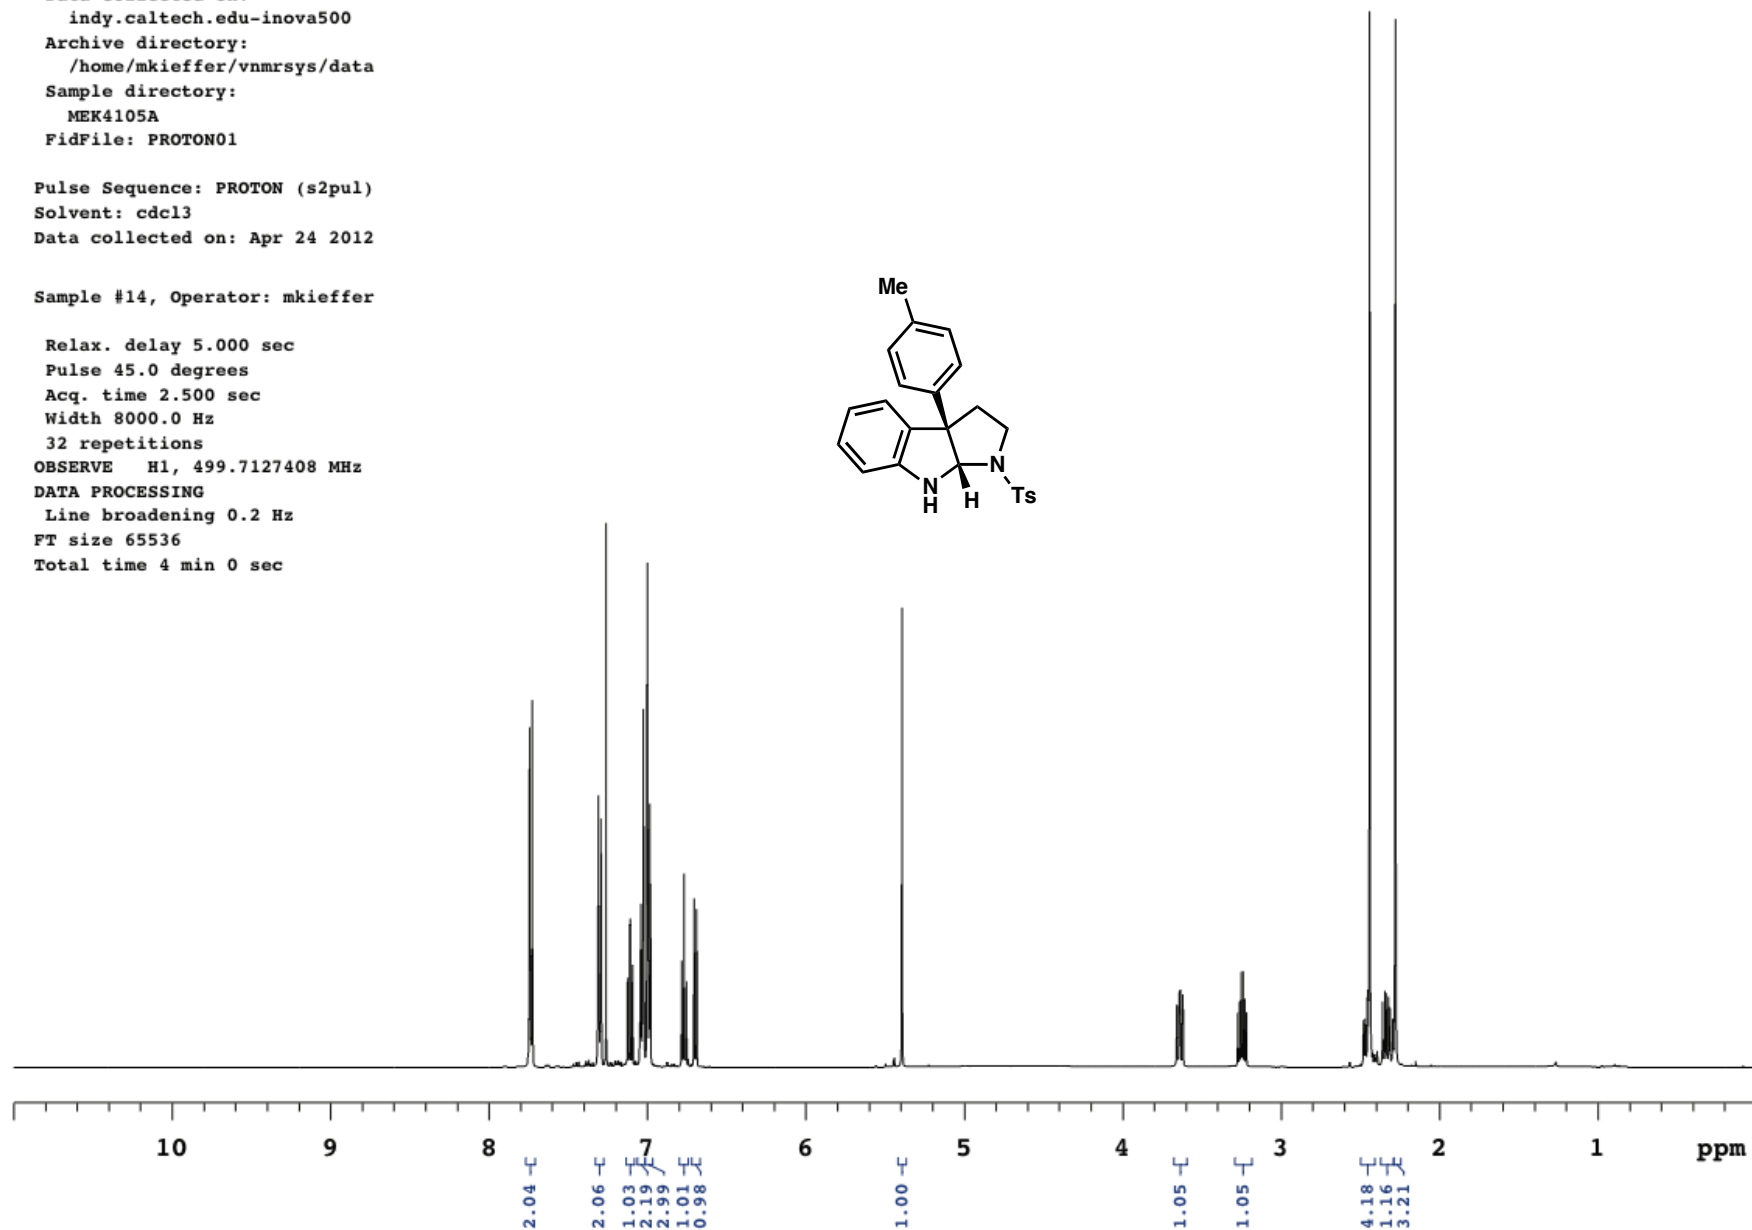

MEK4105A

Sample Name:

MEK4105A

Data Collected on:

indy.caltech.edu-inova500

Archive directory:

/home/mkieffer/vnmrsys/data

Sample directory:

MEK4105A

FidFile: CARBON01

Pulse Sequence: CARBON (s2pul)

Solvent: cdcl3

Data collected on: Apr 24 2012

Sample #14, Operator: mkieffer

Relax. delay 1.000 sec

Pulse 45.0 degrees

Acq. time 1.042 sec

Width 31446.5 Hz

512 repetitions

OBSERVE C13, 125.6528729 MHz

DECOUPLE H1, 499.7152303 MHz

Power 39 dB

continuously on

WALTZ-16 modulated

DATA PROCESSING

Line broadening 0.5 Hz

FT size 65536

Total time 17 min

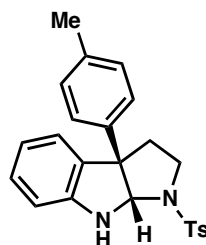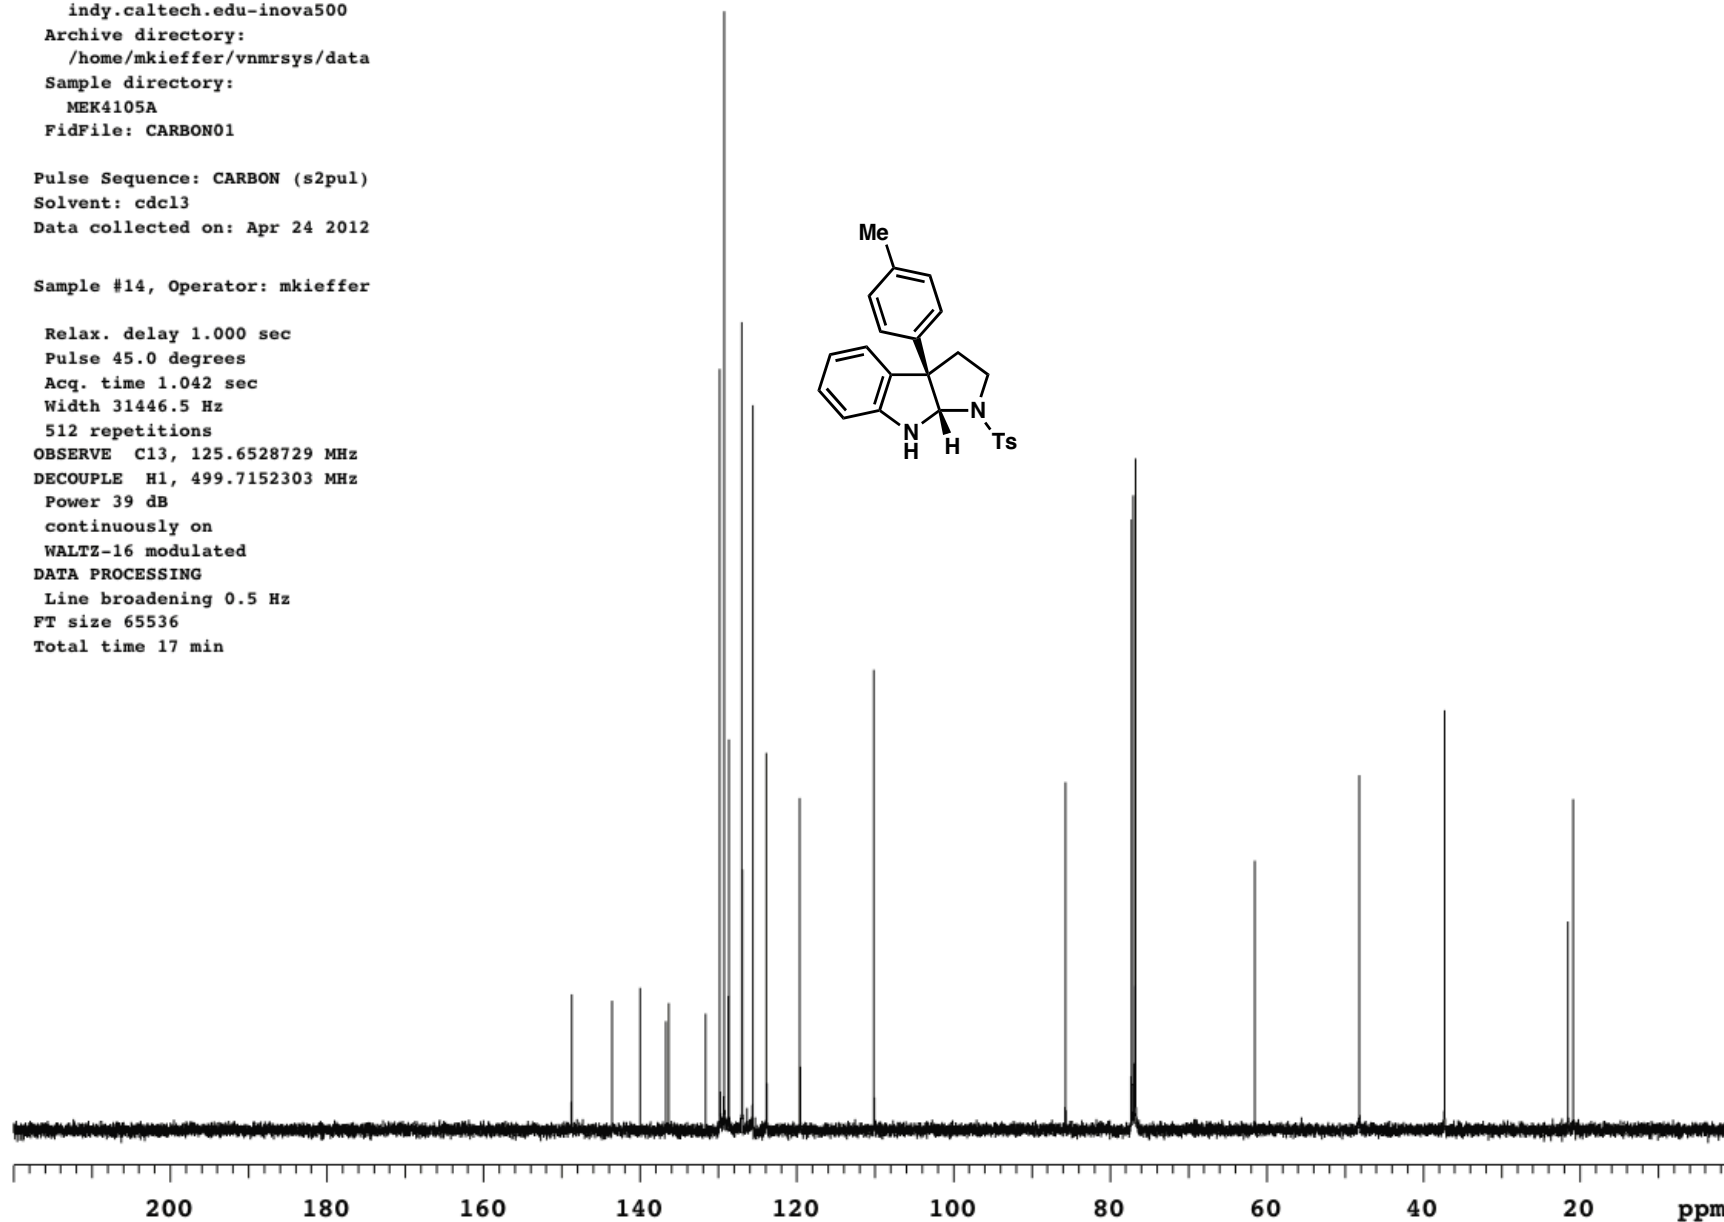



MEK4096

Sample Name:

MEK4096

Data Collected on:

indy.caltech.edu-inova500

Archive directory:

/home/kangway/vnmrsys/data

Sample directory:

MEK4096

FidFile: PROTON01

Pulse Sequence: PROTON (s2pul)

Solvent: cdcl3

Data collected on: Apr 18 2012

Sample #47, Operator: kangway

Relax. delay 5.000 sec

Pulse 45.0 degrees

Acq. time 2.500 sec

Width 8000.0 Hz

32 repetitions

OBSERVE H1, 499.7127394 MHz

DATA PROCESSING

Line broadening 0.2 Hz

FT size 65536

Total time 4 min 0 sec

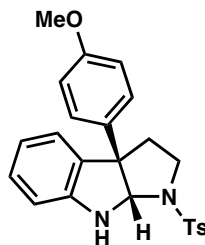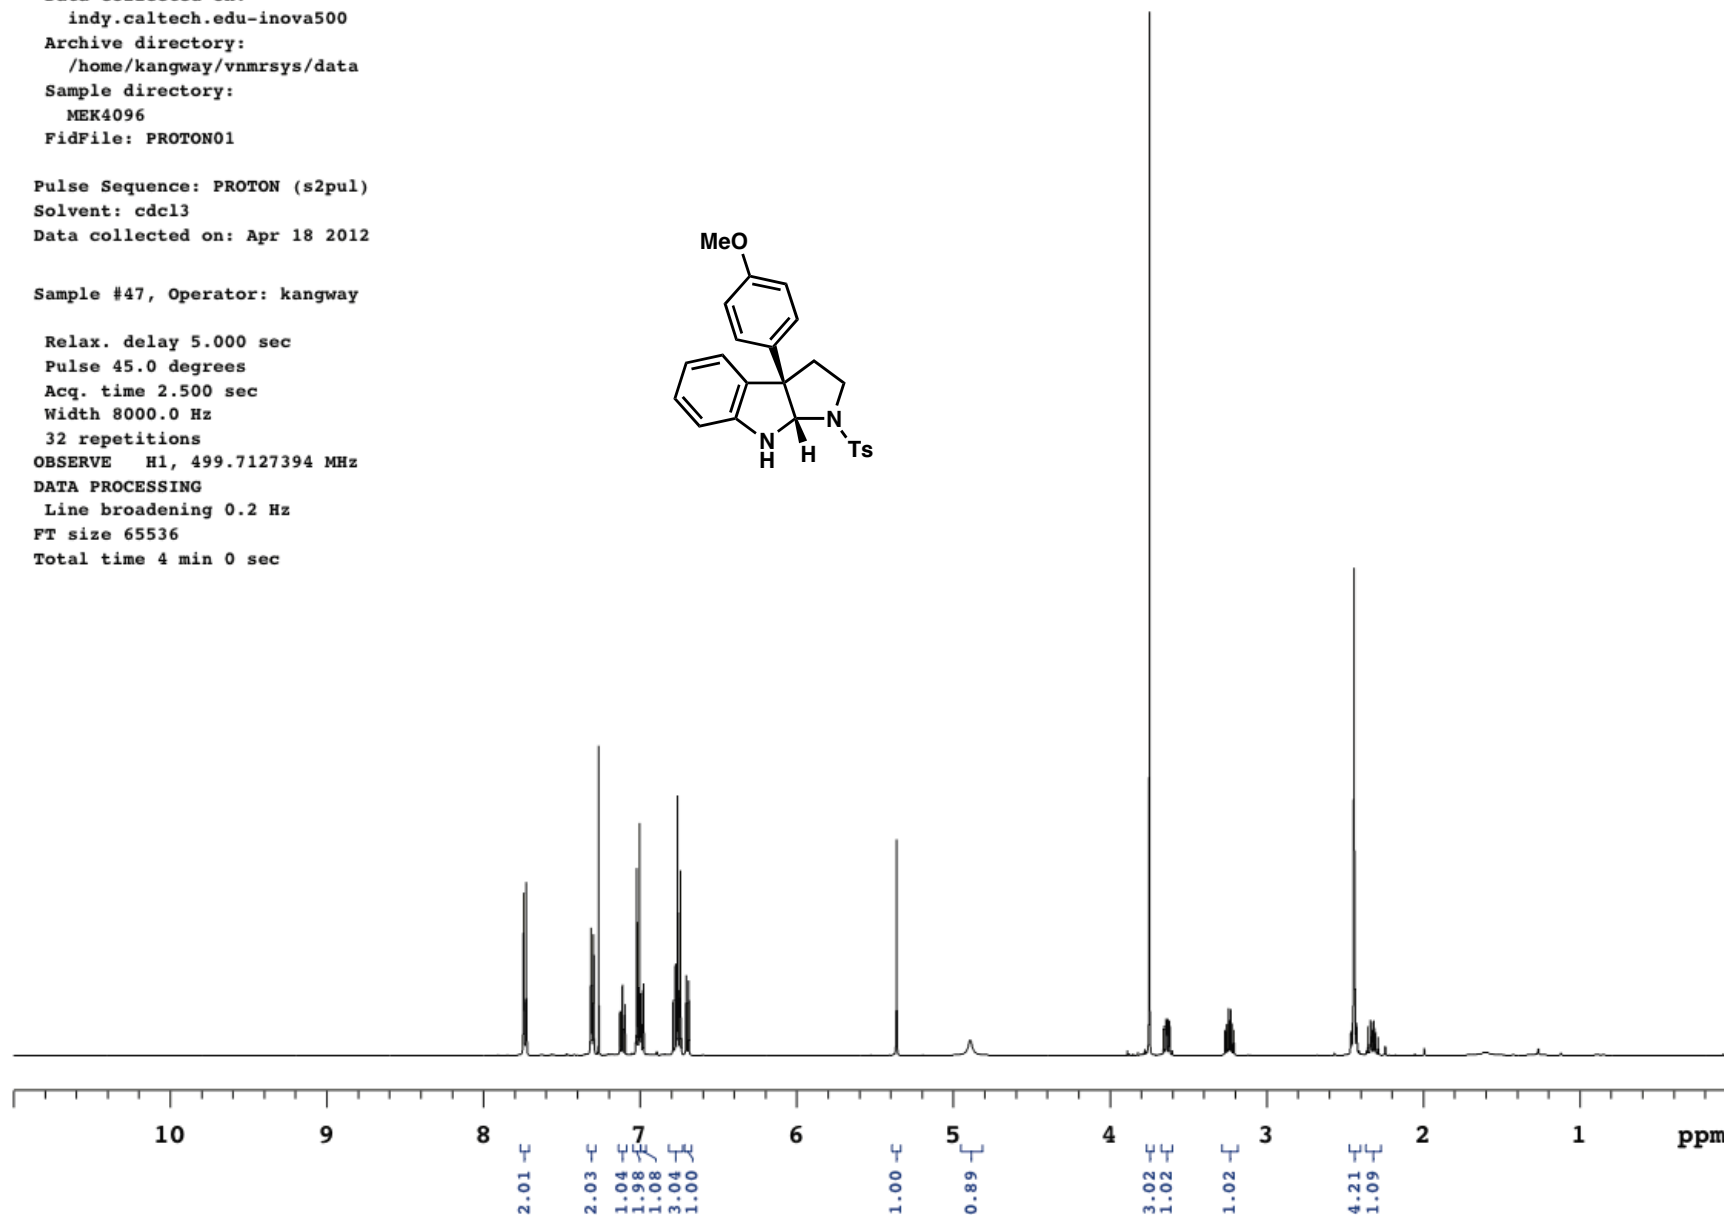

MEK4096

Sample Name:

MEK4096

Data Collected on:

indy.caltech.edu-inova500

Archive directory:

/home/kangway/vnmrsys/data

Sample directory:

MEK4096

FidFile: CARBON01

Pulse Sequence: CARBON (s2pul)

Solvent: cdcl3

Data collected on: Apr 18 2012

Sample #47, Operator: kangway

Relax. delay 1.000 sec

Pulse 45.0 degrees

Acq. time 1.042 sec

Width 31446.5 Hz

512 repetitions

OBSERVE C13, 125.6528729 MHz

DECOUPLE H1, 499.7152303 MHz

Power 39 dB

continuously on

WALTZ-16 modulated

DATA PROCESSING

Line broadening 0.5 Hz

FT size 65536

Total time 17 min

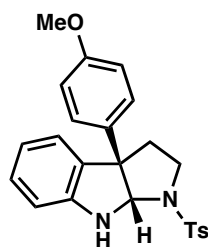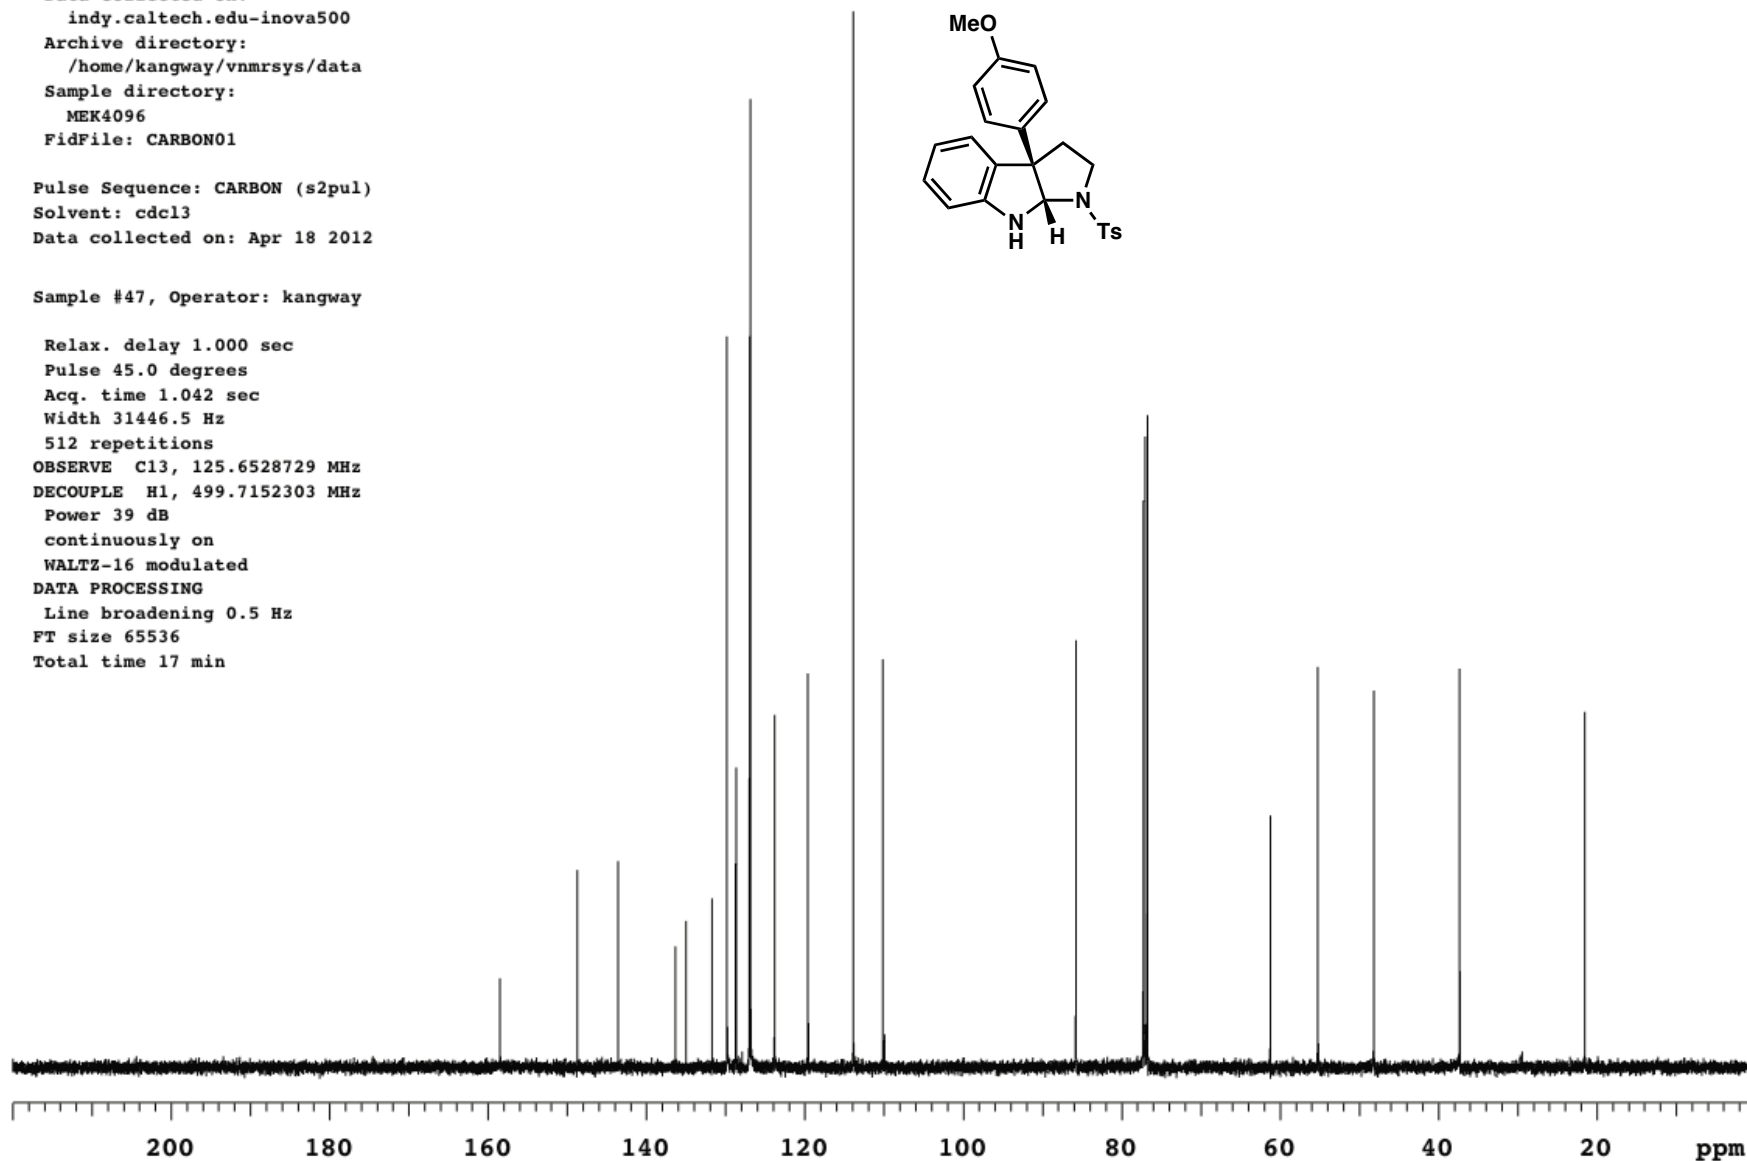

Sample Name:  
 MEK4117-B  
 Data Collected on:  
 indy.caltech.edu-inova500  
 Archive directory:  
 /home/mkieffer/vnmrsys/data  
 Sample directory:  
 MEK4117-B  
 FidFile: PROTON02

Pulse Sequence: PROTON (s2pul)  
 Solvent: cdcl3  
 Data collected on: May 11 2012

Sample #7, Operator: mkieffer

Relax. delay 5.000 sec  
 Pulse 45.0 degrees  
 Acq. time 2.500 sec  
 Width 8000.0 Hz  
 32 repetitions  
 OBSERVE H1, 499.7127410 MHz  
 DATA PROCESSING  
 Line broadening 0.2 Hz  
 FT size 65536  
 Total time 4 min 0 sec

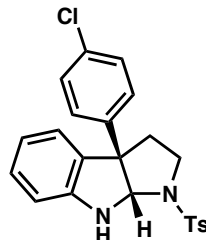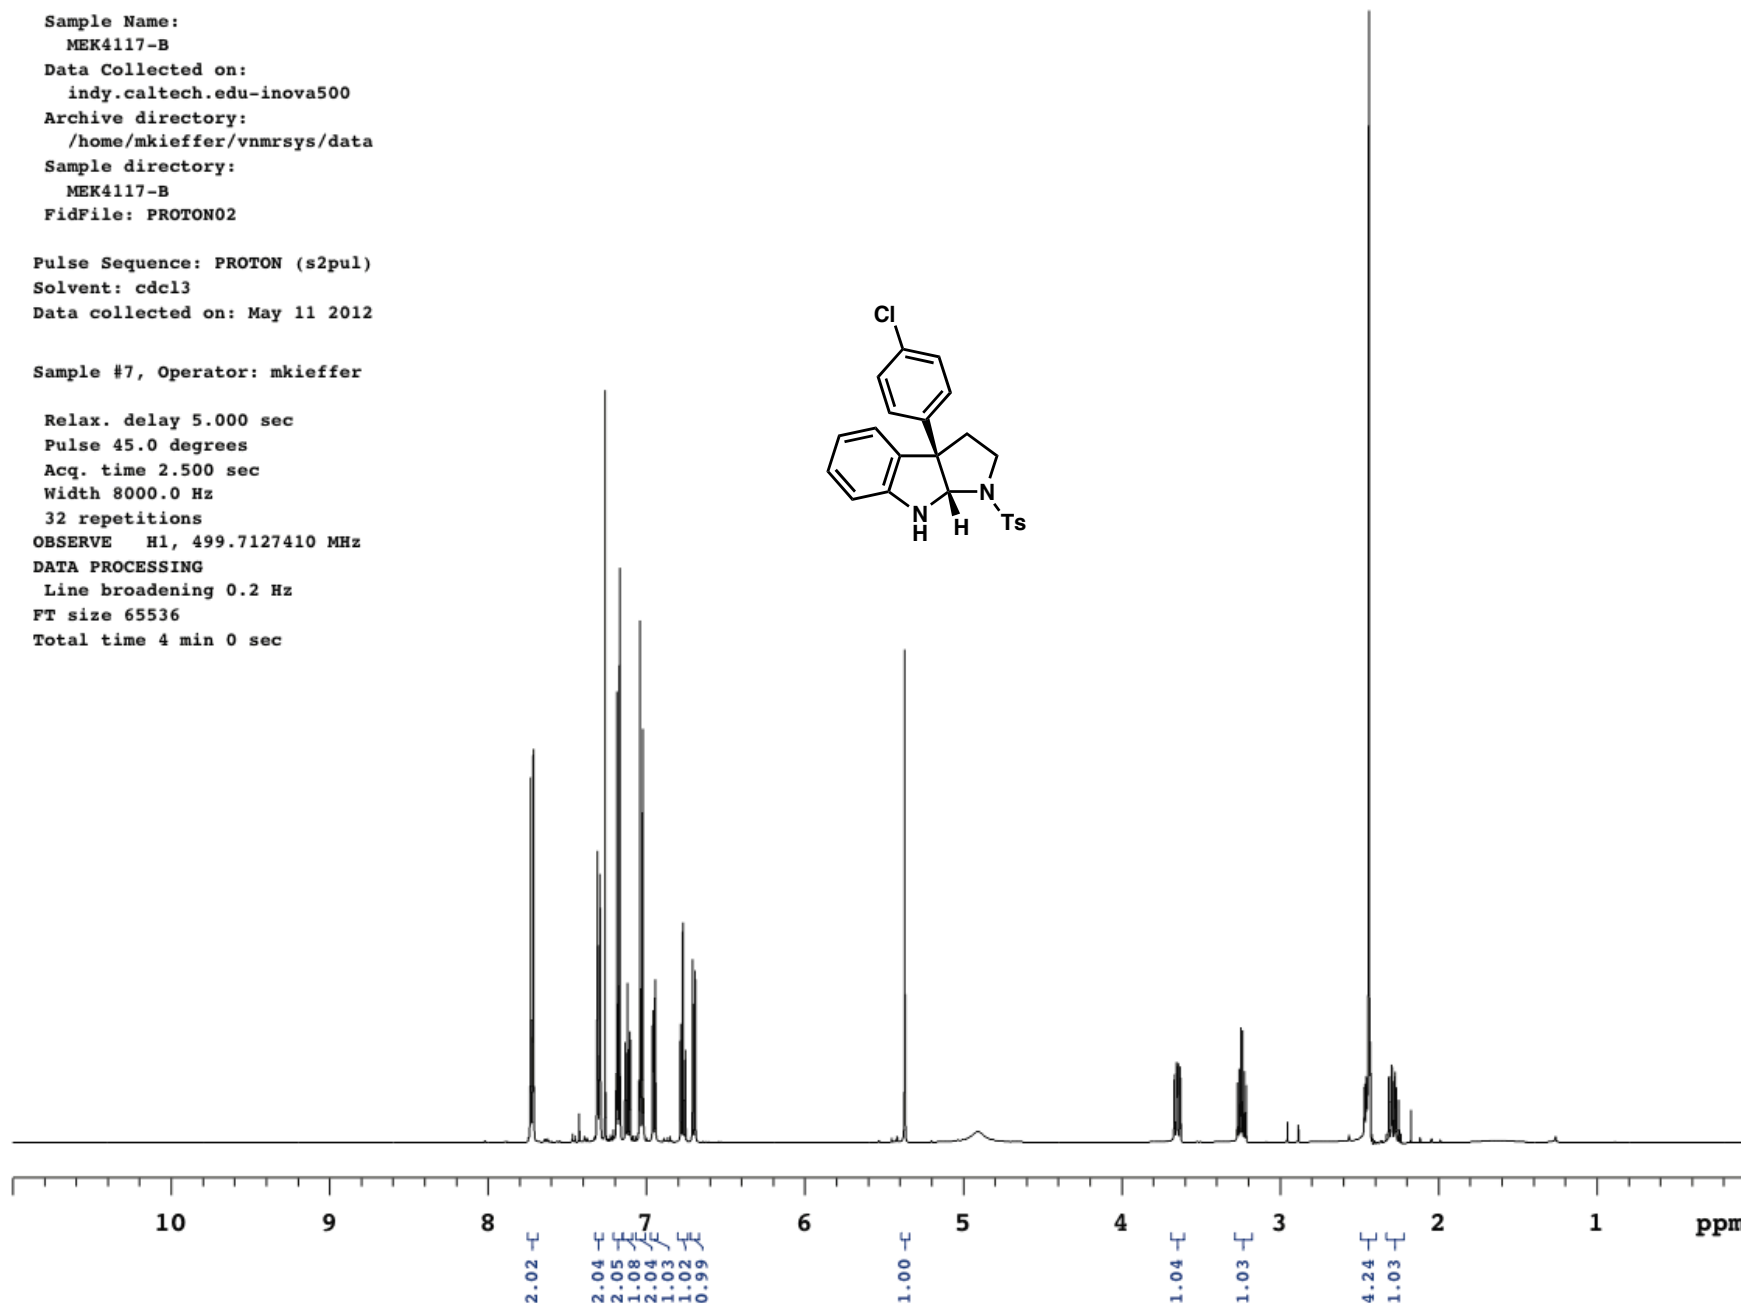

Sample Name:  
MEK4117-B  
Data Collected on:  
indy.caltech.edu-inova500  
Archive directory:  
/home/mkieffer/vnmrsys/data  
Sample directory:  
MEK4117-B  
FidFile: CARBON01

Pulse Sequence: CARBON (s2pul)  
Solvent: cdcl3  
Data collected on: May 11 2012

Sample #7, Operator: mkieffer

Relax. delay 1.000 sec  
Pulse 45.0 degrees  
Acq. time 1.042 sec  
Width 31446.5 Hz  
512 repetitions  
OBSERVE C13, 125.6528739 MHz  
DECOUPLE H1, 499.7152303 MHz  
Power 39 dB  
continuously on  
WALTZ-16 modulated  
DATA PROCESSING  
Line broadening 0.5 Hz  
FT size 65536  
Total time 17 min

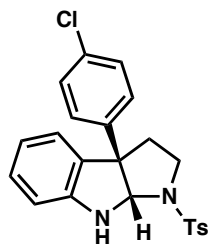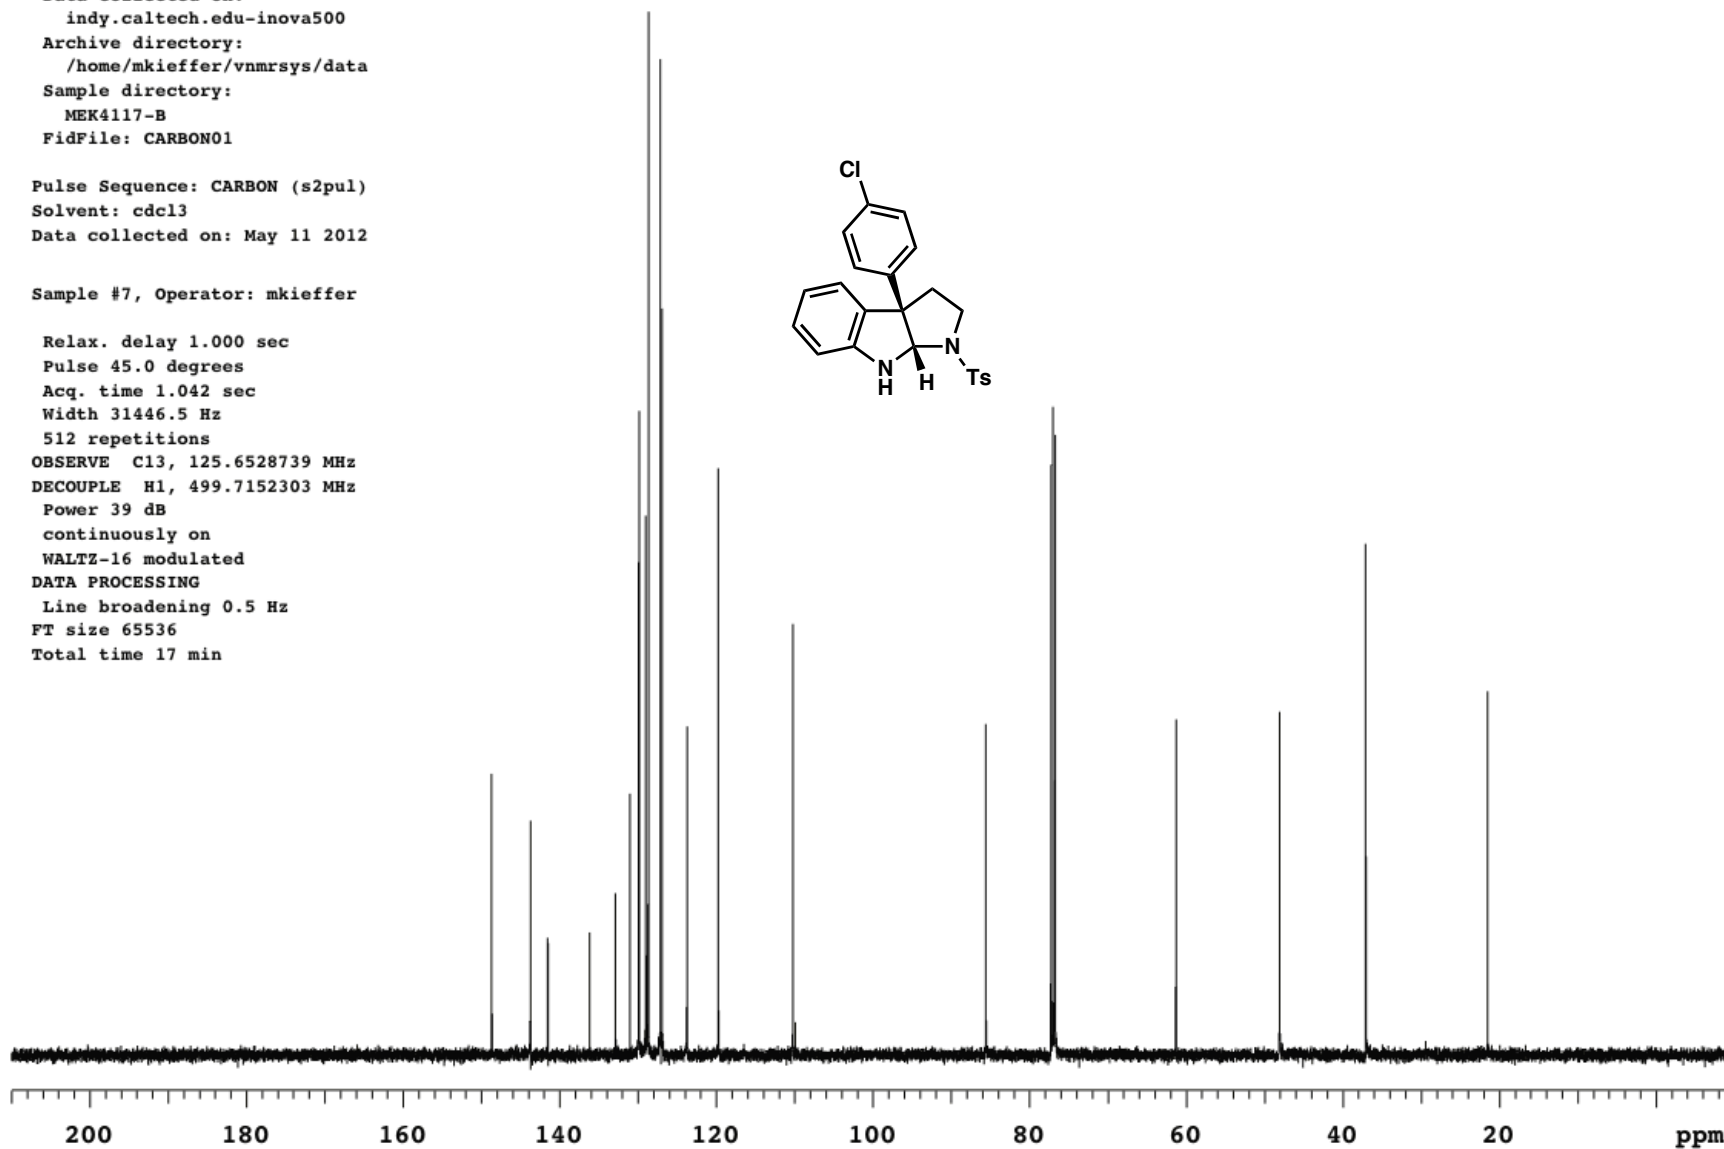

MEK4105B

Sample Name:

MEK4105B

Data Collected on:

indy.caltech.edu-inova500

Archive directory:

/home/mkieffer/vnmrsys/data

Sample directory:

MEK4105B

FidFile: PROTON01

Pulse Sequence: PROTON (s2pul)

Solvent: cdcl3

Data collected on: Apr 25 2012

Sample #16, Operator: mkieffer

Relax. delay 5.000 sec

Pulse 45.0 degrees

Acq. time 2.500 sec

Width 8000.0 Hz

32 repetitions

OBSERVE H1, 499.7127410 MHz

DATA PROCESSING

Line broadening 0.2 Hz

FT size 65536

Total time 4 min 0 sec

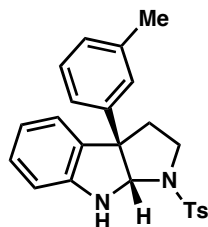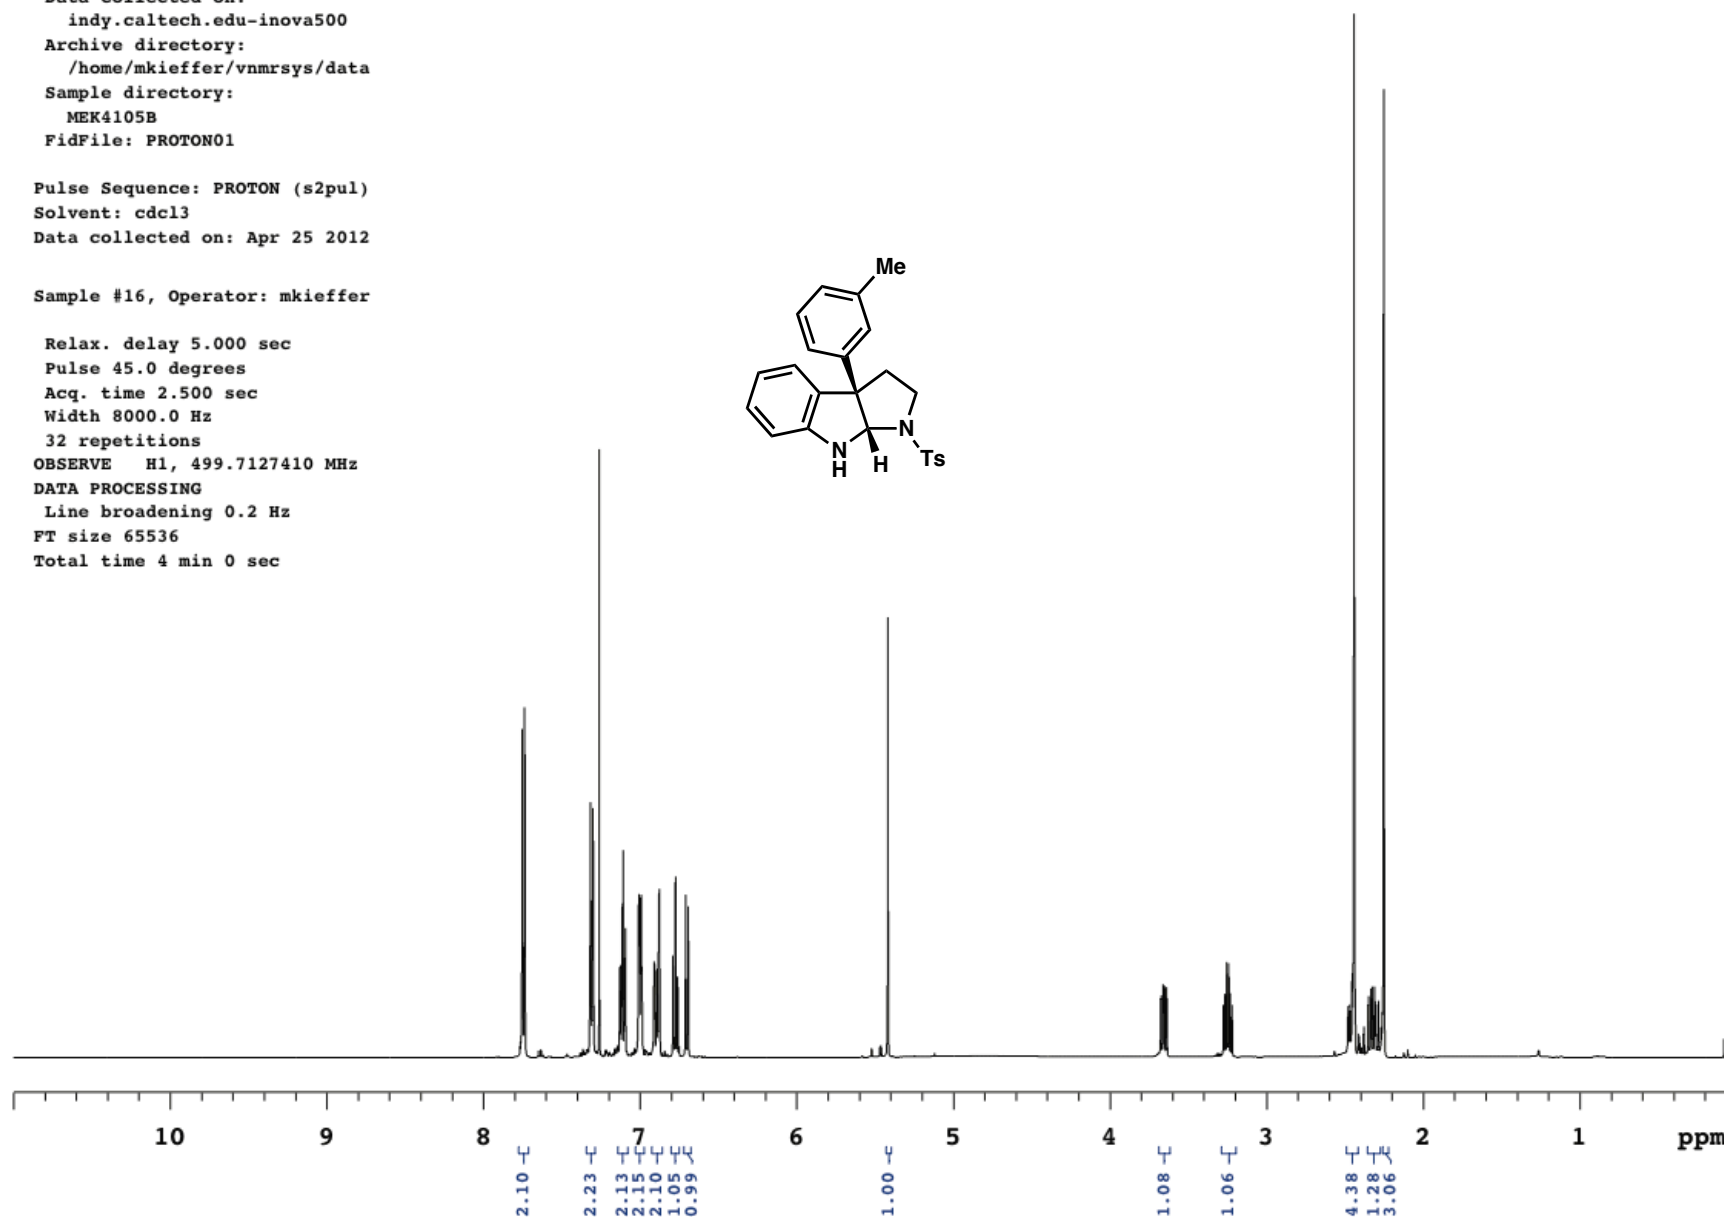

MEK4105B

Sample Name:

MEK4105B

Data Collected on:

indy.caltech.edu-inova500

Archive directory:

/home/mkieffer/vnmrsys/data

Sample directory:

MEK4105B

FidFile: CARBON01

Pulse Sequence: CARBON (s2pul)

Solvent: cdcl3

Data collected on: Apr 25 2012

Sample #16, Operator: mkieffer

Relax. delay 1.000 sec

Pulse 45.0 degrees

Acq. time 1.042 sec

Width 31446.5 Hz

512 repetitions

OBSERVE C13, 125.6528729 MHz

DECOUPLE H1, 499.7152303 MHz

Power 39 dB

continuously on

WALTZ-16 modulated

DATA PROCESSING

Line broadening 0.5 Hz

FT size 65536

Total time 17 min

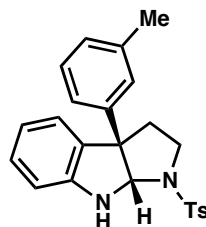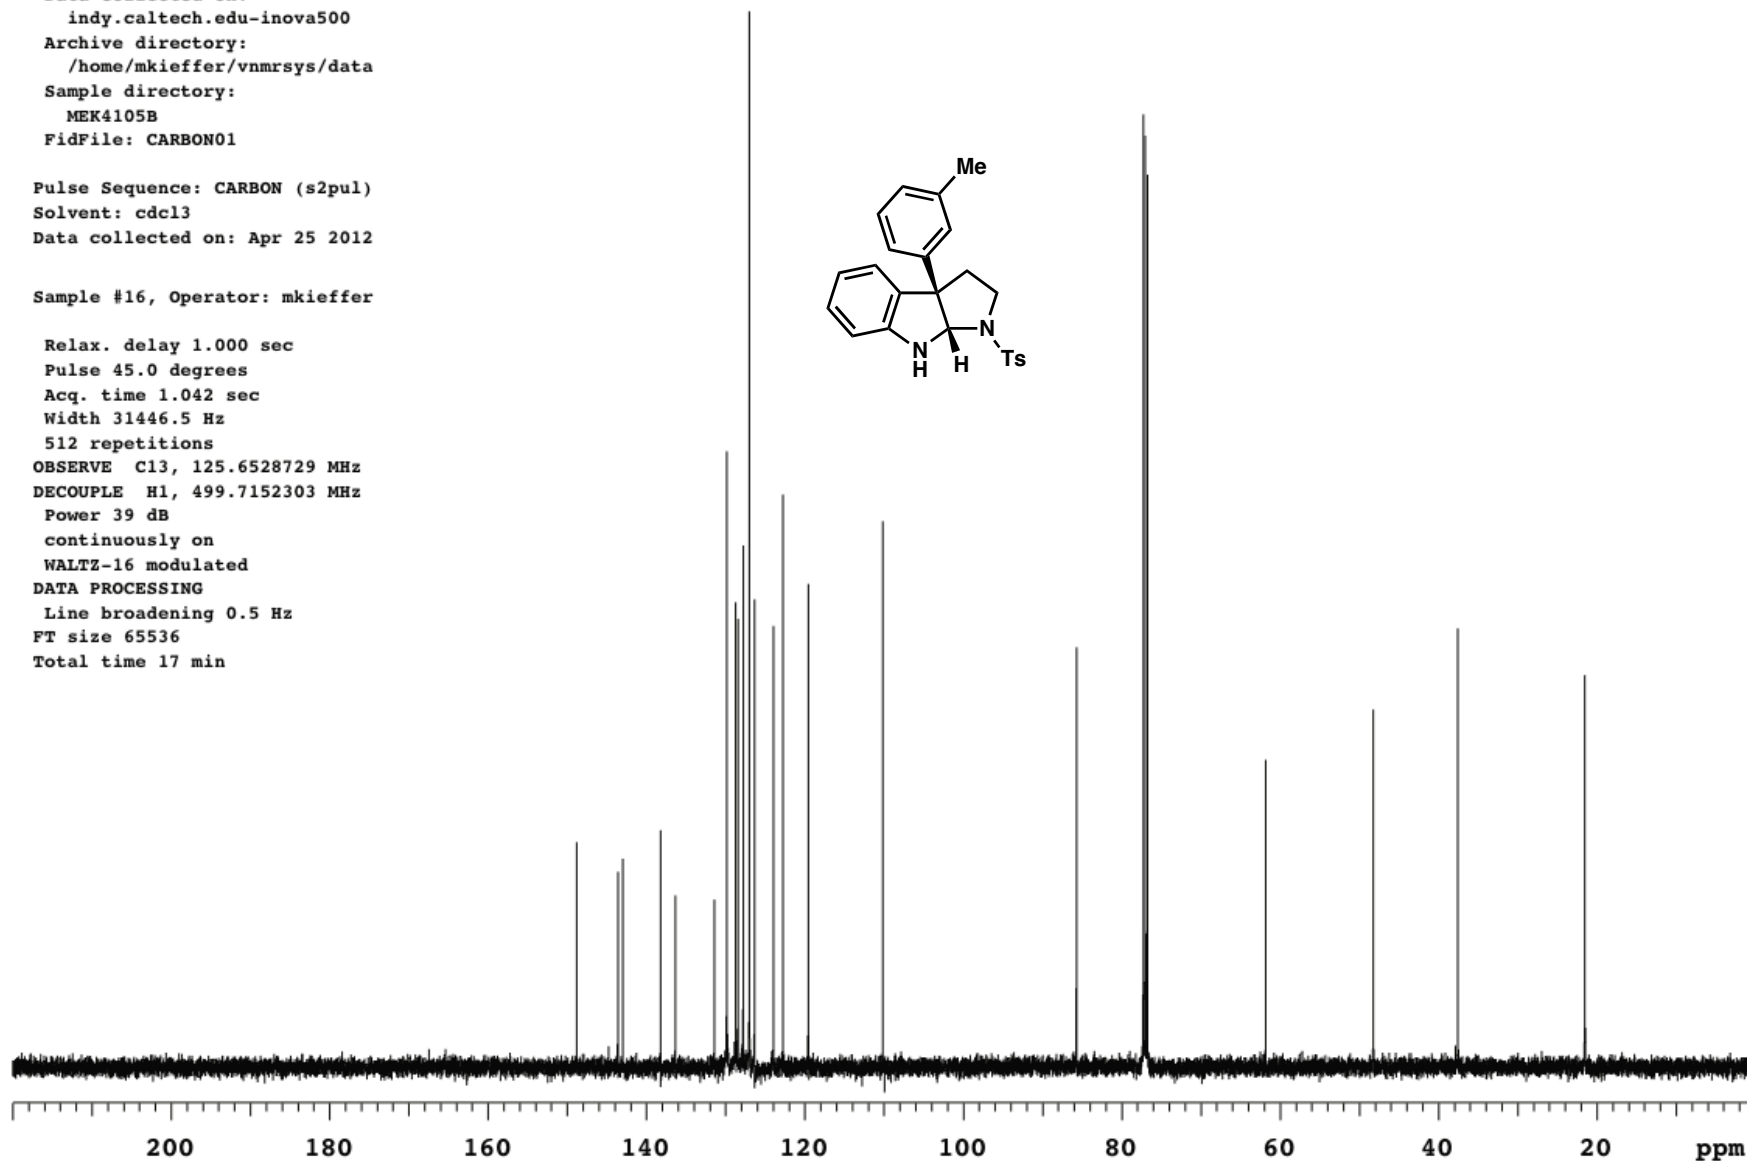

Sample Name:  
MEK4117-D  
Data Collected on:  
indy.caltech.edu-inova500  
Archive directory:  
/home/mkieffer/vnmrsys/data  
Sample directory:  
MEK4117-D  
FidFile: PROTON02

Pulse Sequence: PROTON (s2pul)  
Solvent: cdcl3  
Data collected on: May 11 2012

Sample #9, Operator: mkieffer

Relax. delay 5.000 sec  
Pulse 45.0 degrees  
Acq. time 2.500 sec  
Width 8000.0 Hz  
32 repetitions  
OBSERVE H1, 499.7127408 MHz  
DATA PROCESSING  
Line broadening 0.2 Hz  
FT size 65536  
Total time 4 min 0 sec

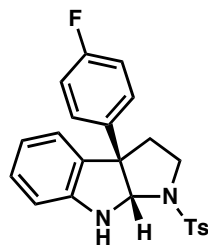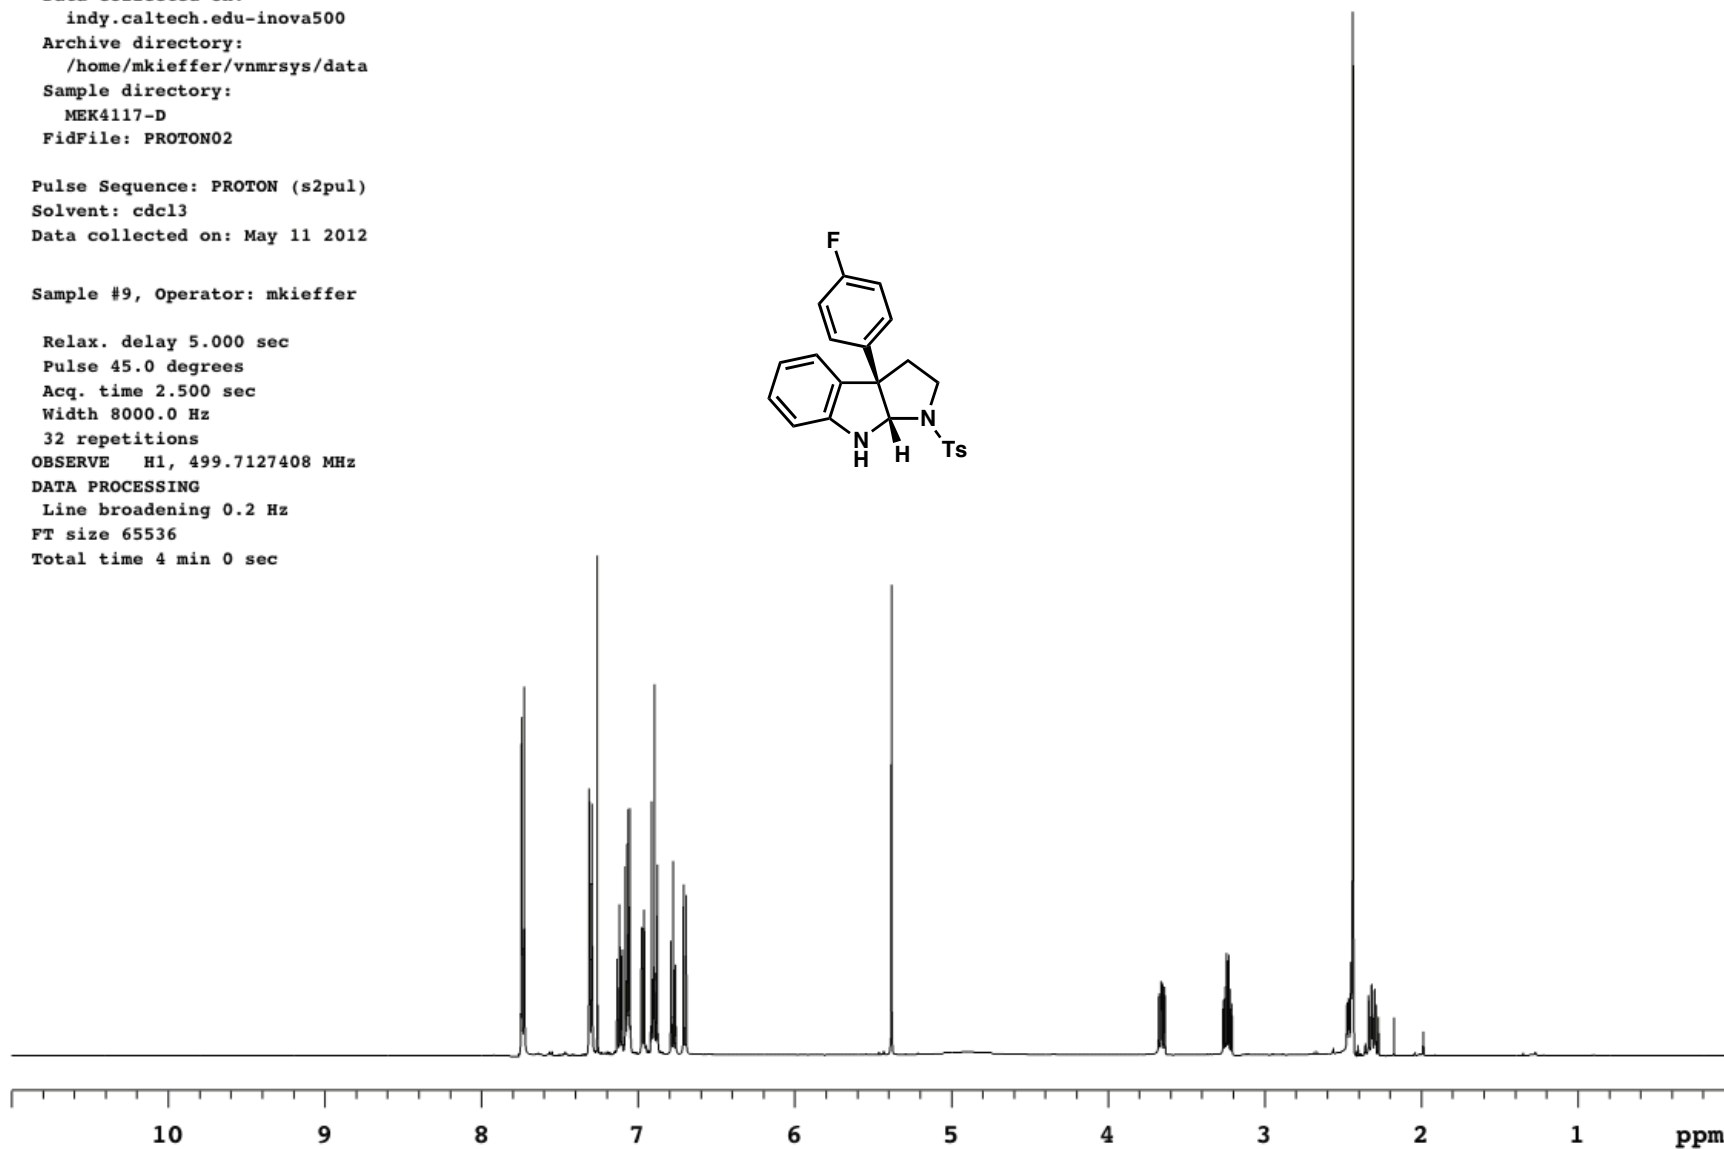

Sample Name:  
MEK4117-D  
Data Collected on:  
indy.caltech.edu-inova500  
Archive directory:  
/home/mkieffer/vnmrsys/data  
Sample directory:  
MEK4117-D  
FidFile: CARBON01

Pulse Sequence: CARBON (s2pul)  
Solvent: cdcl3  
Data collected on: May 11 2012

Sample #9, Operator: mkieffer

Relax. delay 1.000 sec  
Pulse 45.0 degrees  
Acq. time 1.042 sec  
Width 31446.5 Hz  
1000 repetitions  
OBSERVE C13, 125.6528787 MHz  
DECOUPLE H1, 499.7152303 MHz  
Power 39 dB  
continuously on  
WALTZ-16 modulated  
DATA PROCESSING  
Line broadening 0.5 Hz  
FT size 65536  
Total time 34 min

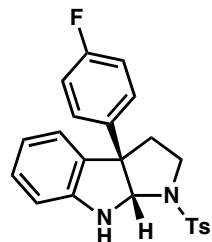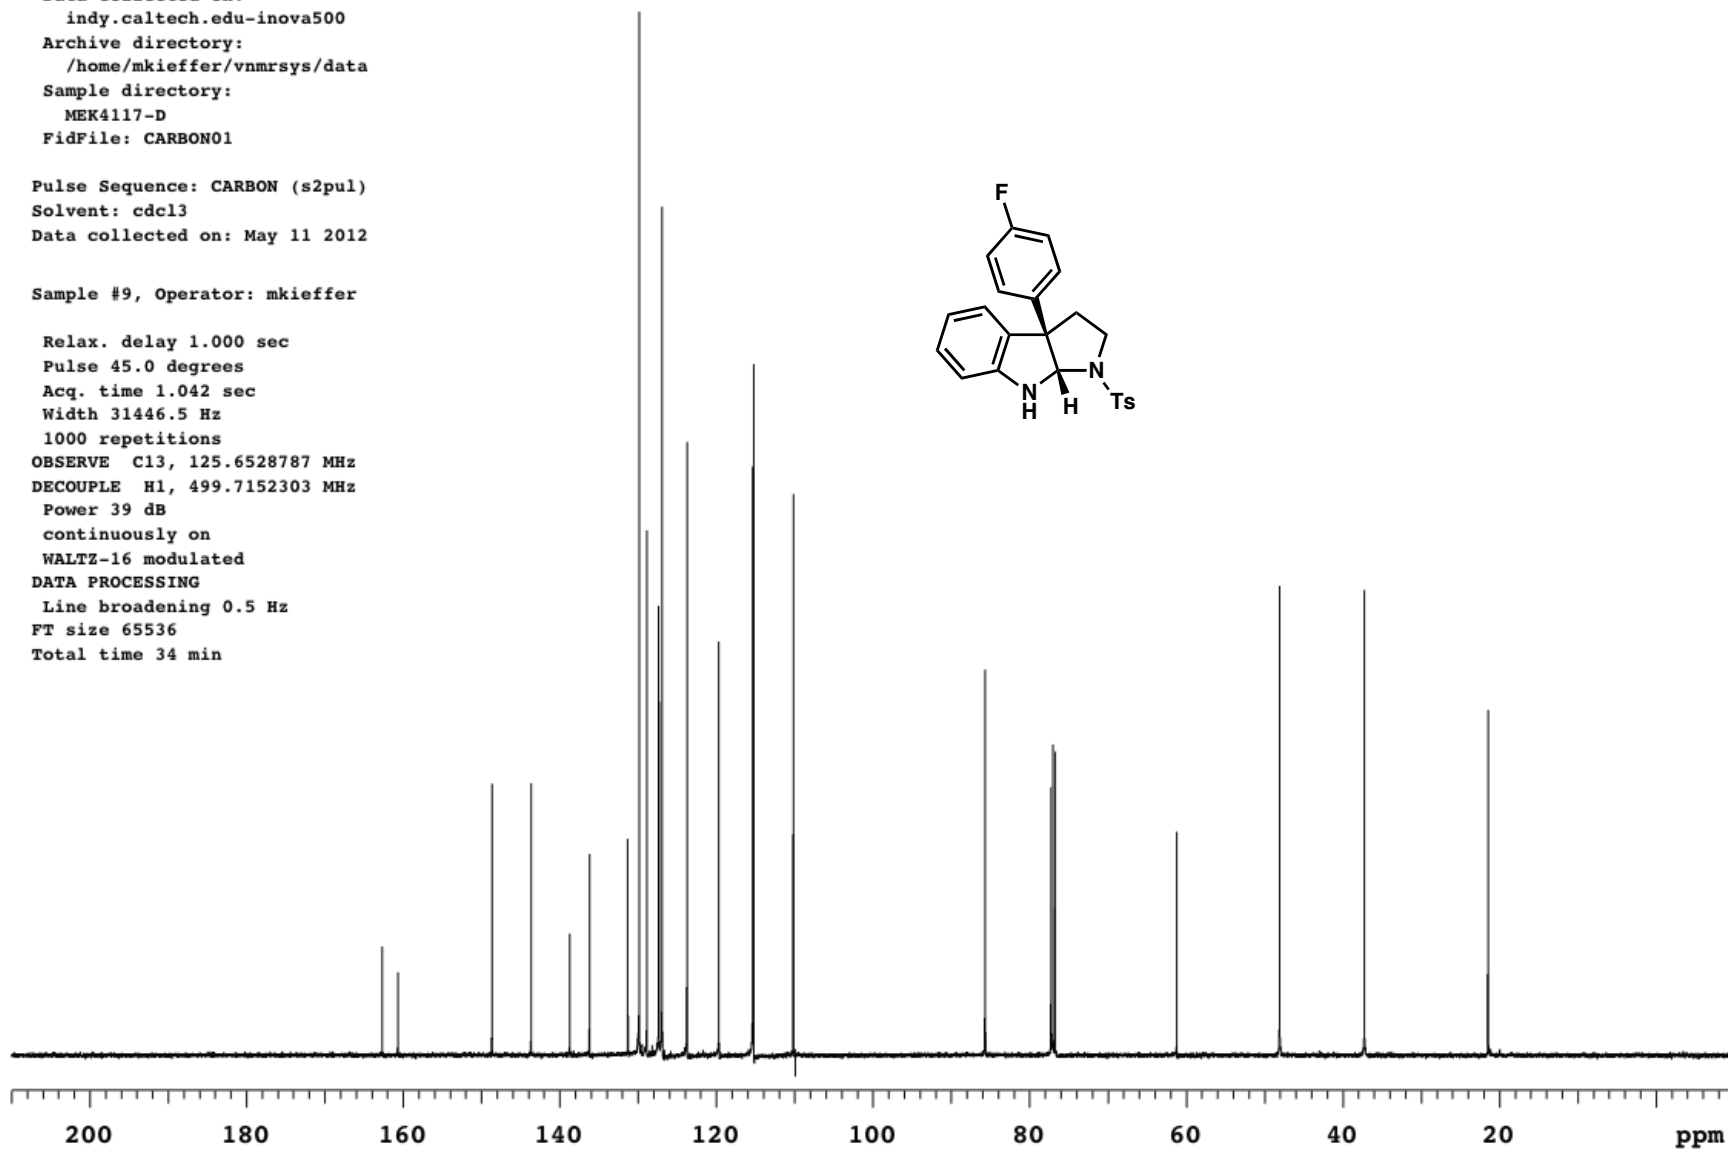



Sample Name:  
MEK4117-C  
Data Collected on:  
indy.caltech.edu-inova500  
Archive directory:  
/home/mkieffer/vnmrsys/data  
Sample directory:  
MEK4117-C  
FidFile: PROTON02

Pulse Sequence: PROTON (s2pul)  
Solvent: cdcl3  
Data collected on: May 11 2012

Sample #8, Operator: mkieffer

Relax. delay 5.000 sec  
Pulse 45.0 degrees  
Acq. time 2.500 sec  
Width 8000.0 Hz  
32 repetitions  
OBSERVE H1, 499.7127408 MHz  
DATA PROCESSING  
Line broadening 0.2 Hz  
FT size 65536  
Total time 4 min 0 sec

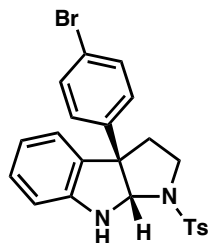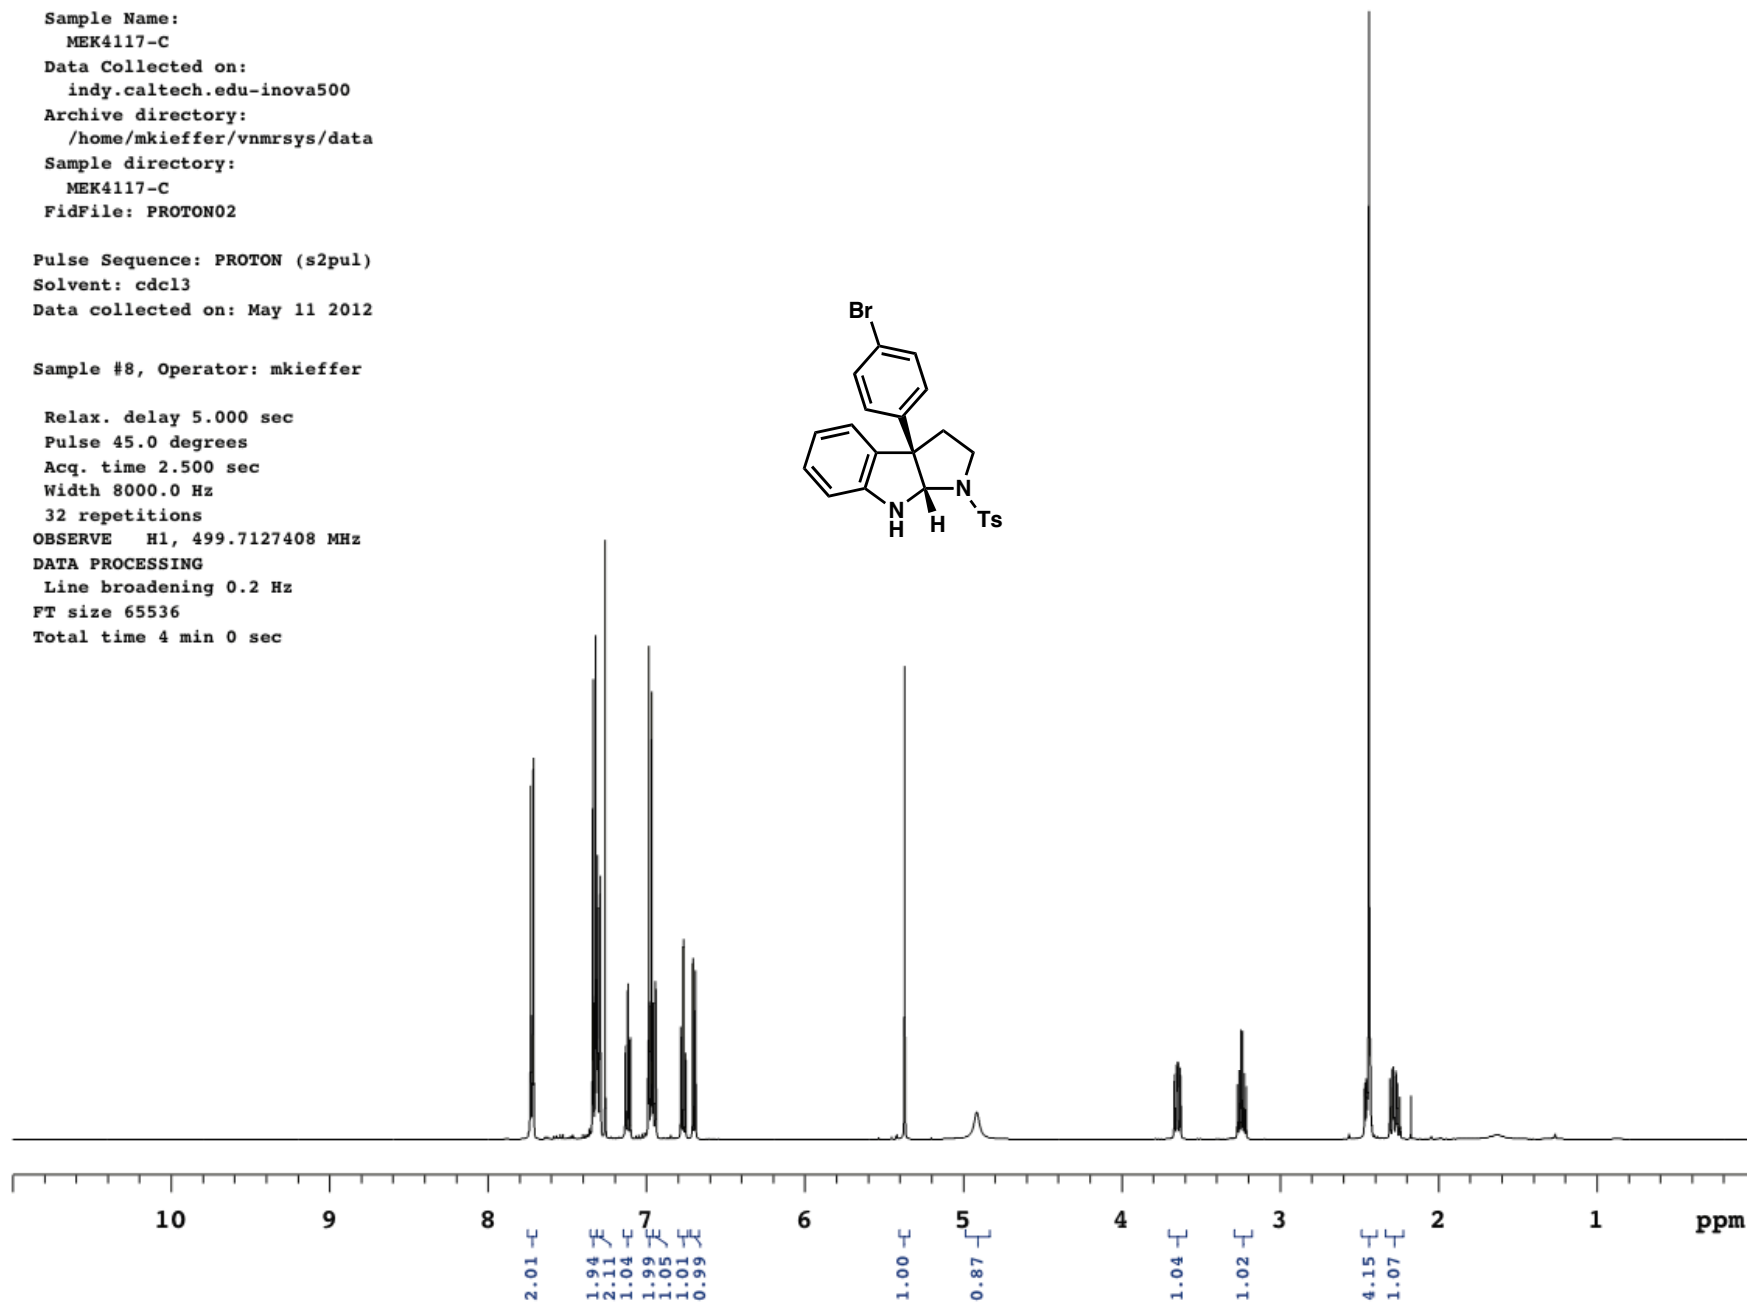

Sample Name:  
MEK4117-C  
Data Collected on:  
indy.caltech.edu-inova500  
Archive directory:  
/home/mkieffer/vnmrsys/data  
Sample directory:  
MEK4117-C  
FidFile: CARBON01

Pulse Sequence: CARBON (s2pul)  
Solvent: cdcl3  
Data collected on: May 11 2012

Sample #8, Operator: mkieffer

Relax. delay 1.000 sec  
Pulse 45.0 degrees  
Acq. time 1.042 sec  
Width 31446.5 Hz  
512 repetitions  
OBSERVE C13, 125.6528758 MHz  
DECOUPLE H1, 499.7152303 MHz  
Power 39 dB  
continuously on  
WALTZ-16 modulated  
DATA PROCESSING  
Line broadening 0.5 Hz  
FT size 65536  
Total time 17 min

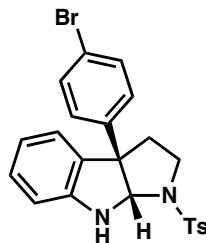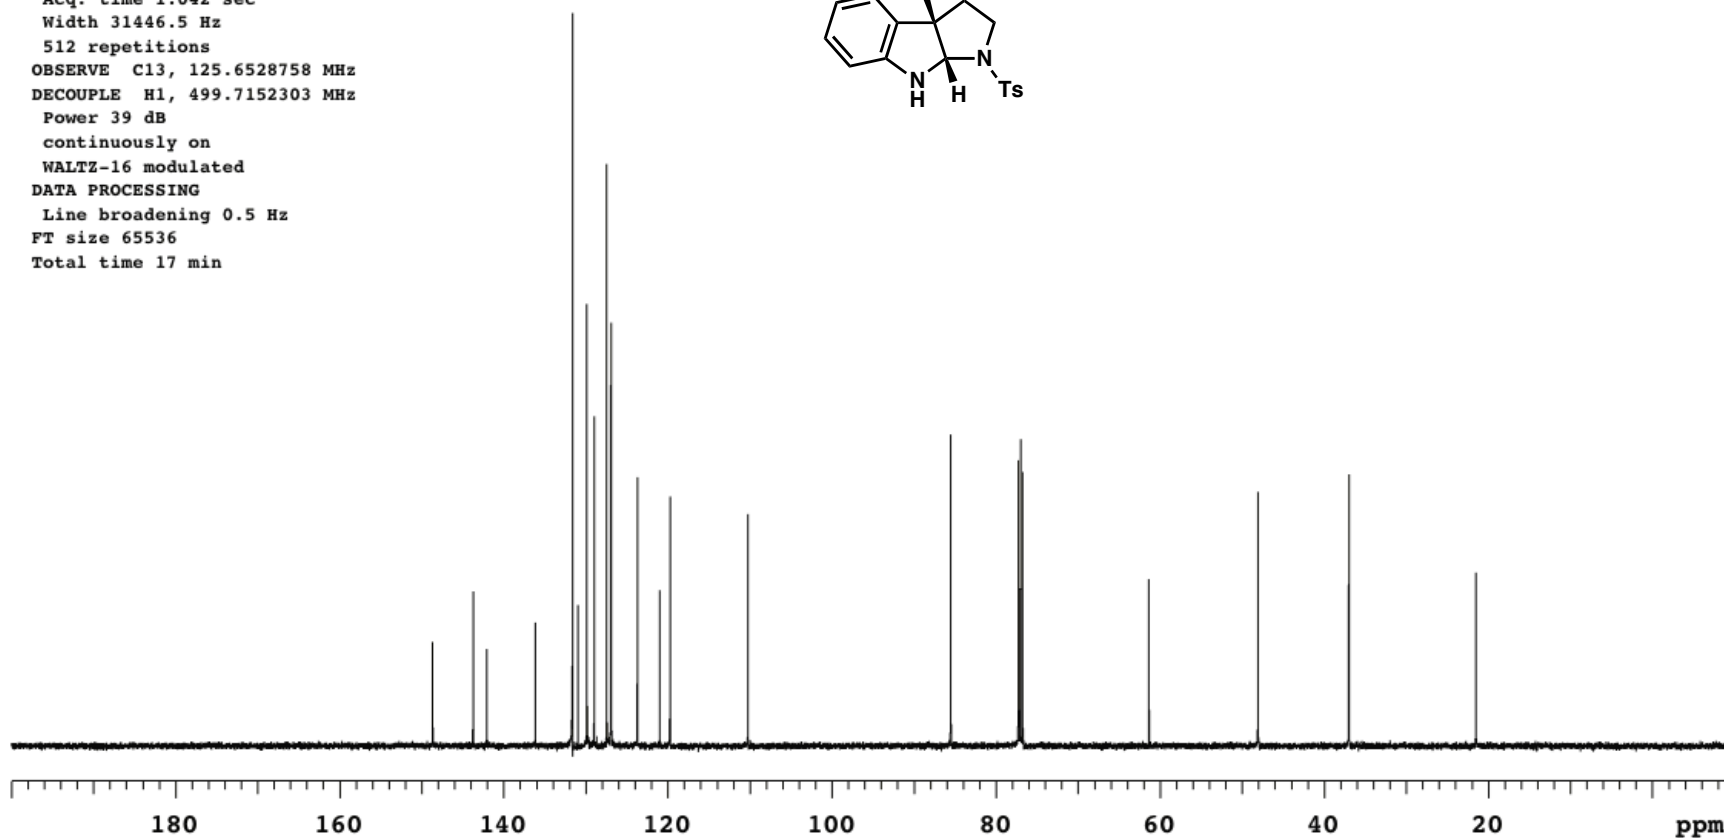

MEK4105D

Sample Name:

MEK4105D

Data Collected on:

indy.caltech.edu-inova500

Archive directory:

/home/mkieffer/vnmrsys/data

Sample directory:

MEK4105D

FidFile: PROTON01

Pulse Sequence: PROTON (s2pul)

Solvent: cdcl3

Data collected on: Apr 25 2012

Sample #18, Operator: mkieffer

Relax. delay 5.000 sec

Pulse 45.0 degrees

Acq. time 2.500 sec

Width 8000.0 Hz

32 repetitions

OBSERVE H1, 499.7127410 MHz

DATA PROCESSING

Line broadening 0.2 Hz

FT size 65536

Total time 4 min 0 sec

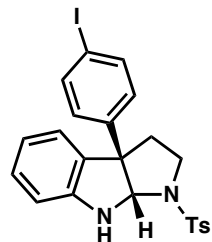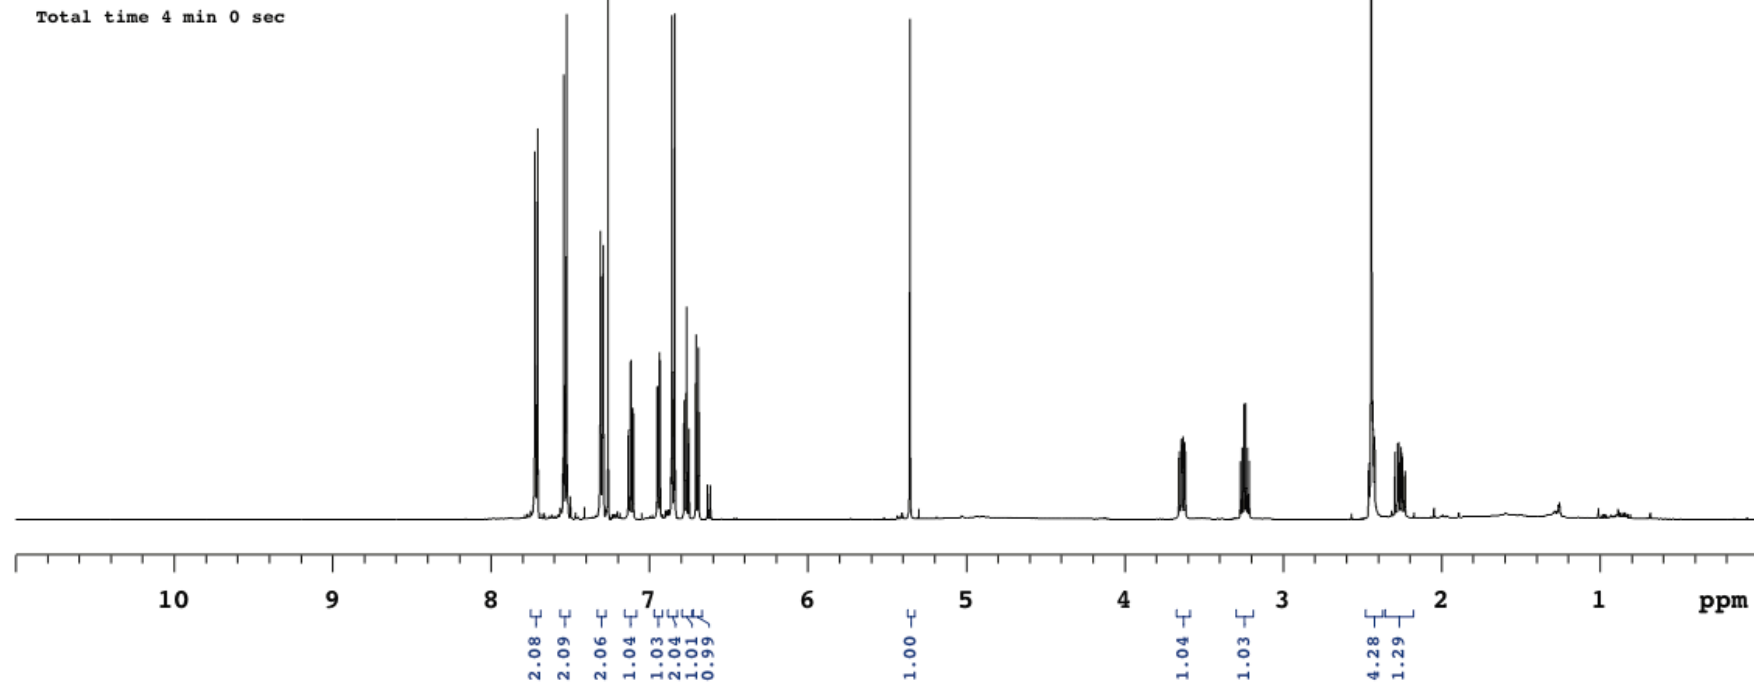

MEK4105D

Sample Name:

MEK4105D

Data Collected on:

indy.caltech.edu-inova500

Archive directory:

/home/mkieffer/vnmrsys/data

Sample directory:

MEK4105D

FidFile: CARBON01

Pulse Sequence: CARBON (s2pul)

Solvent: cdcl3

Data collected on: Apr 25 2012

Sample #18, Operator: mkieffer

Relax. delay 1.000 sec

Pulse 45.0 degrees

Acq. time 1.042 sec

Width 31446.5 Hz

2000 repetitions

OBSERVE C13, 125.6528700 MHz

DECOUPLE H1, 499.7152303 MHz

Power 39 dB

continuously on

WALTZ-16 modulated

DATA PROCESSING

Line broadening 0.5 Hz

FT size 65536

Total time 1 hr, 8 min

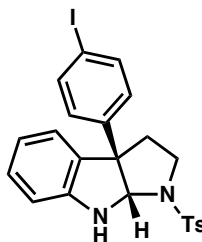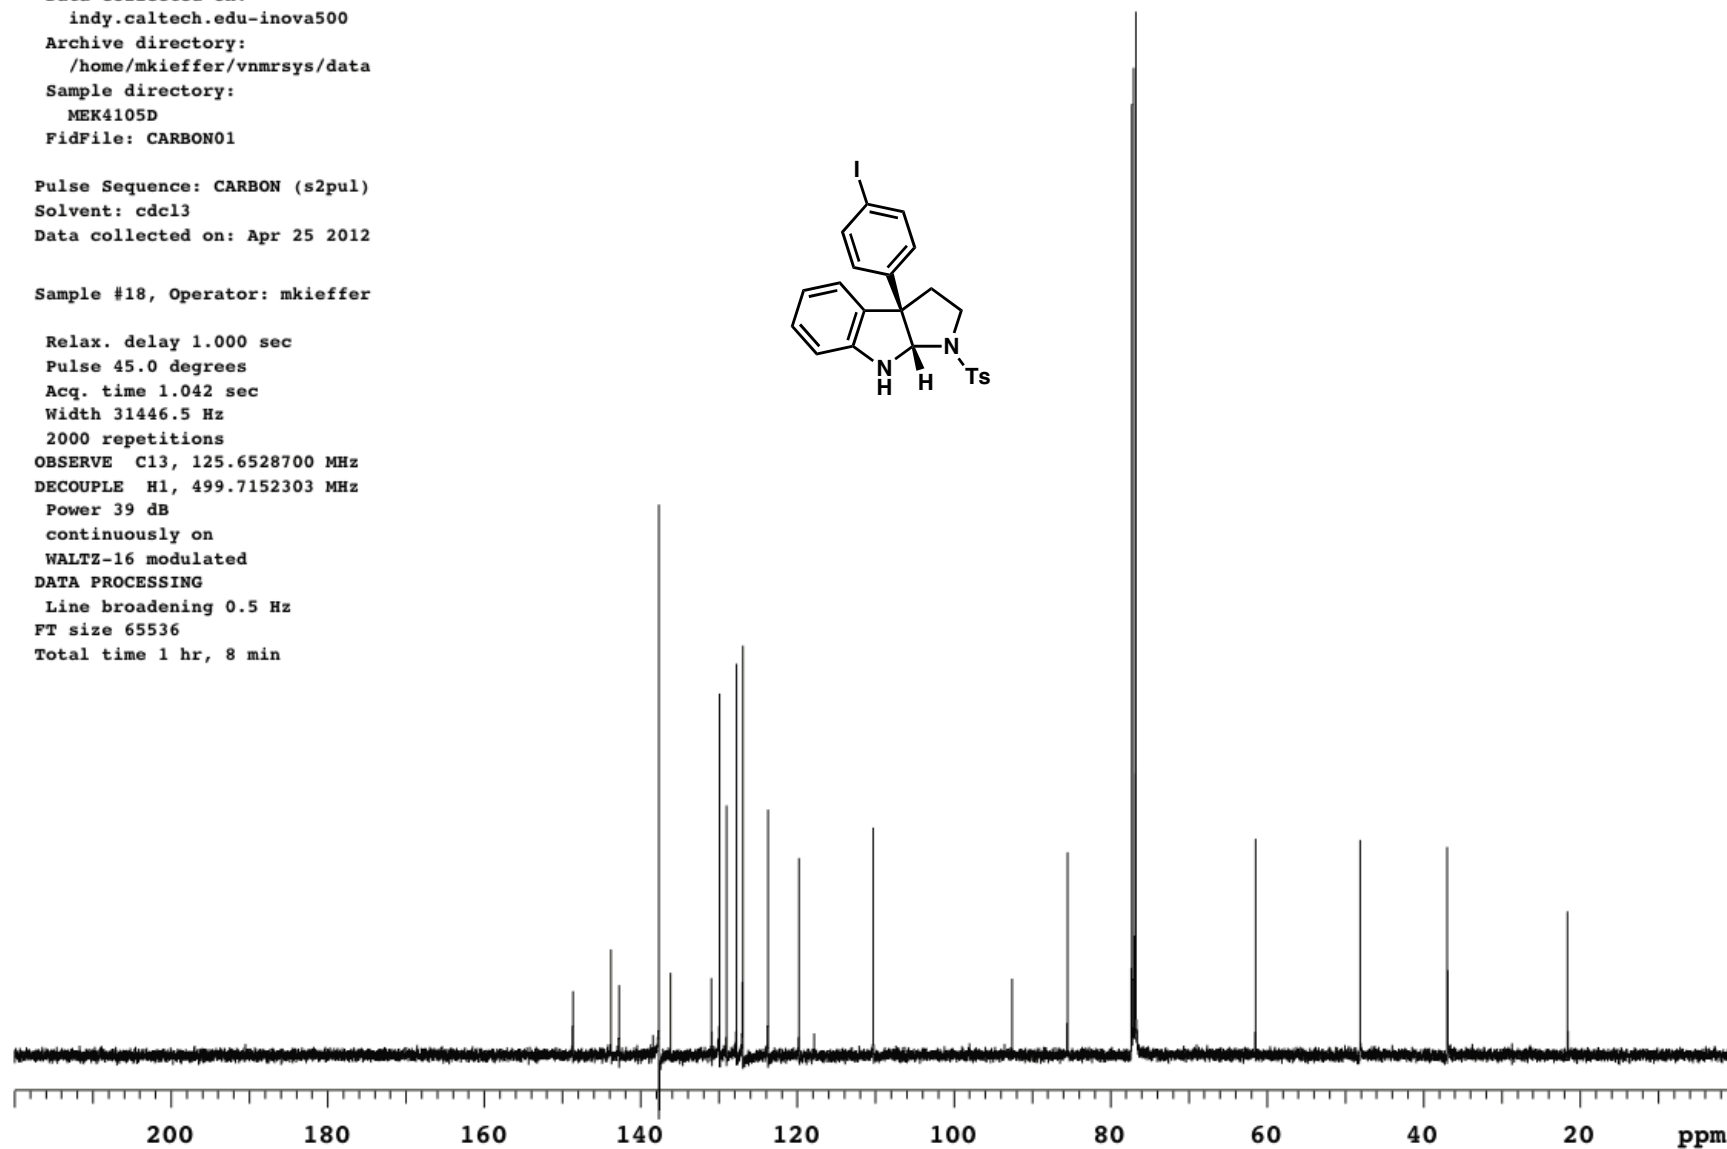

Sample Name:  
MEK4119-B  
Data Collected on:  
indy.caltech.edu-inova500  
Archive directory:  
/home/mkieffer/vnmrsys/data  
Sample directory:  
MEK4119-B  
FidFile: PROTON02

Pulse Sequence: PROTON (s2pul)  
Solvent: cdcl3  
Data collected on: May 25 2012

Sample #10, Operator: mkieffer

Relax. delay 5.000 sec  
Pulse 45.0 degrees  
Acq. time 2.500 sec  
Width 8000.0 Hz  
32 repetitions  
OBSERVE H1, 499.7127410 MHz  
DATA PROCESSING  
Line broadening 0.2 Hz  
FT size 65536  
Total time 4 min 0 sec

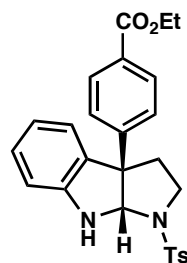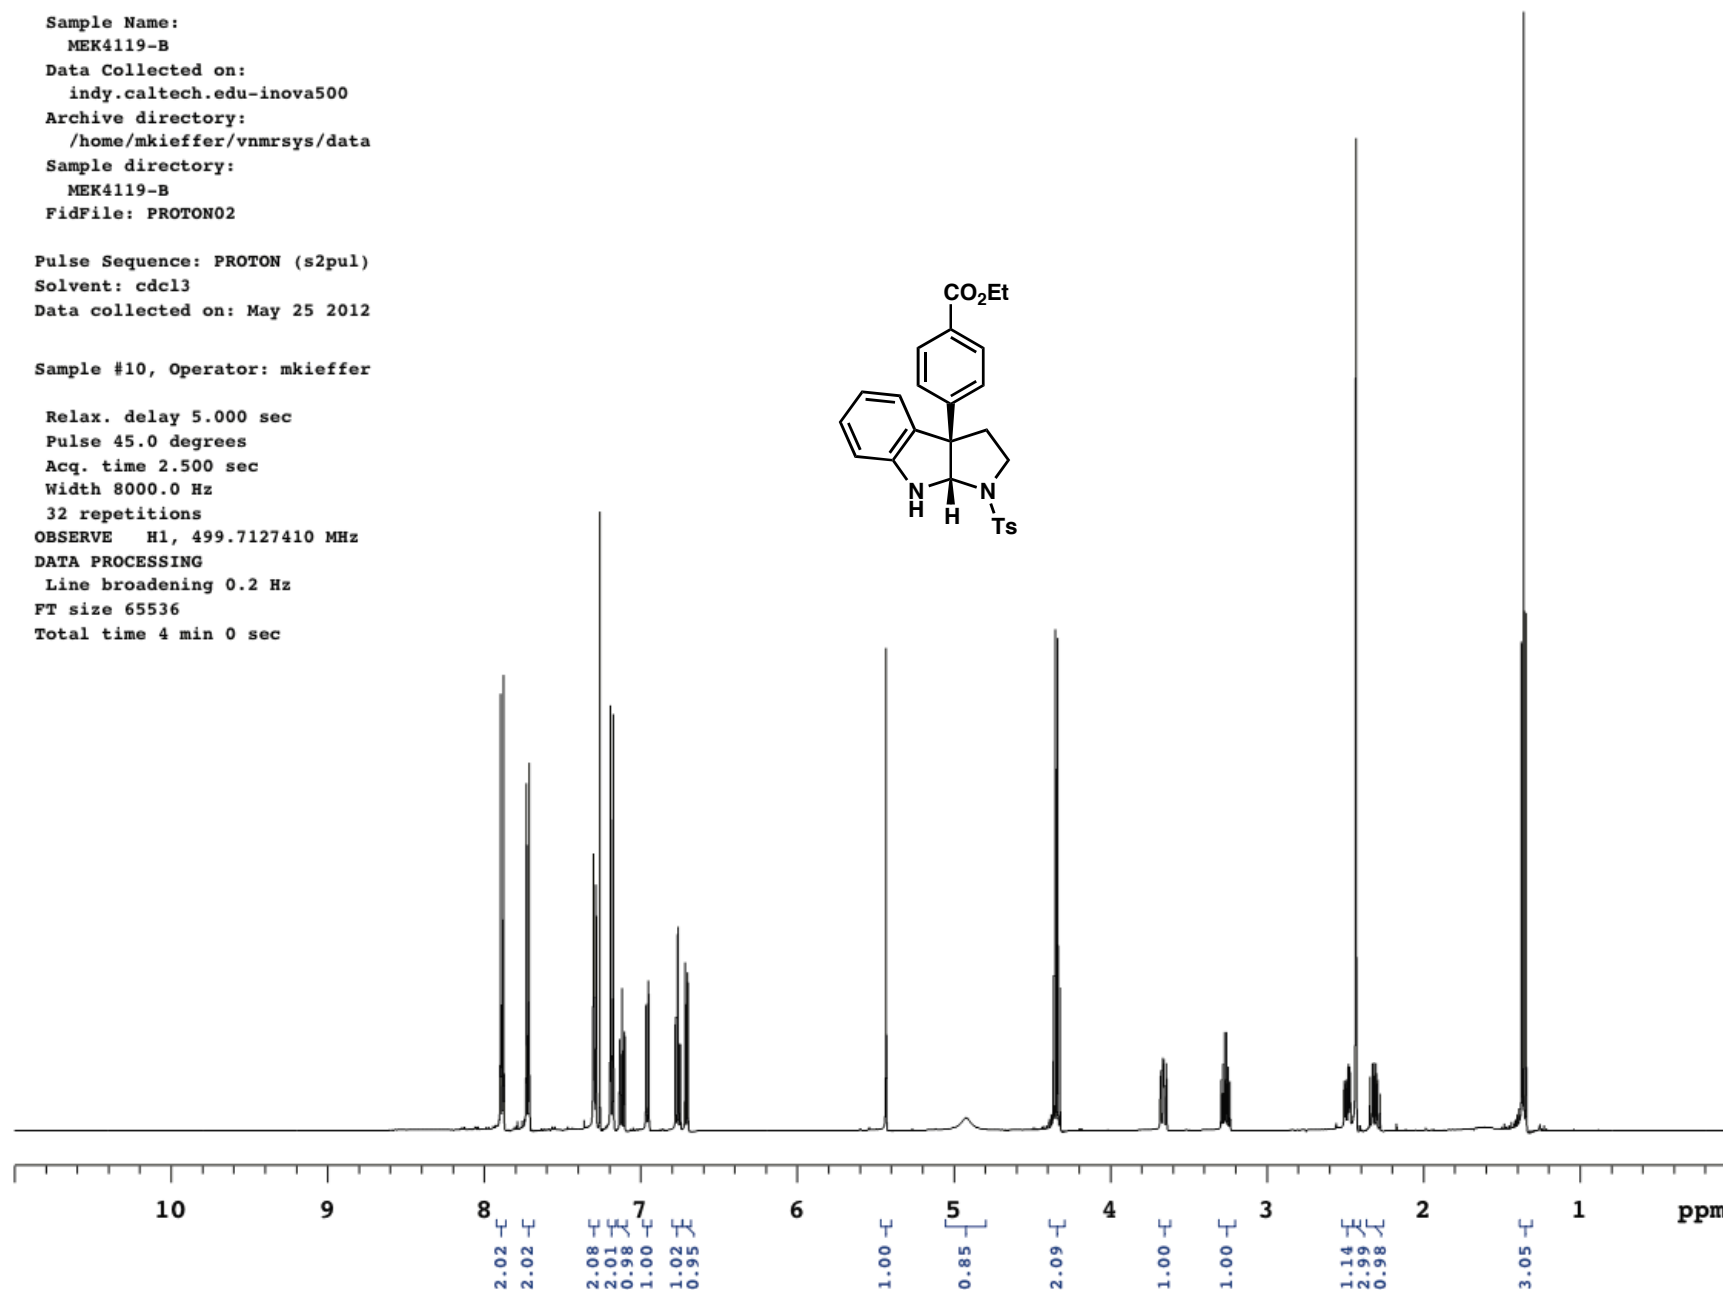

Sample Name:  
MEK4119-B  
Data Collected on:  
indy.caltech.edu-inova500  
Archive directory:  
/home/mkieffer/vnmrsys/data  
Sample directory:  
MEK4119-B  
FidFile: CARBON01

Pulse Sequence: CARBON (s2pul)  
Solvent: cdcl3  
Data collected on: May 25 2012

Sample #10, Operator: mkieffer

Relax. delay 1.000 sec  
Pulse 45.0 degrees  
Acq. time 1.042 sec  
Width 31446.5 Hz  
512 repetitions  
OBSERVE C13, 125.6528719 MHz  
DECOUPLE H1, 499.7152303 MHz  
Power 39 dB  
continuously on  
WALTZ-16 modulated  
DATA PROCESSING  
Line broadening 0.5 Hz  
FT size 65536  
Total time 17 min

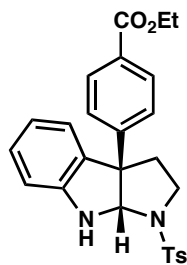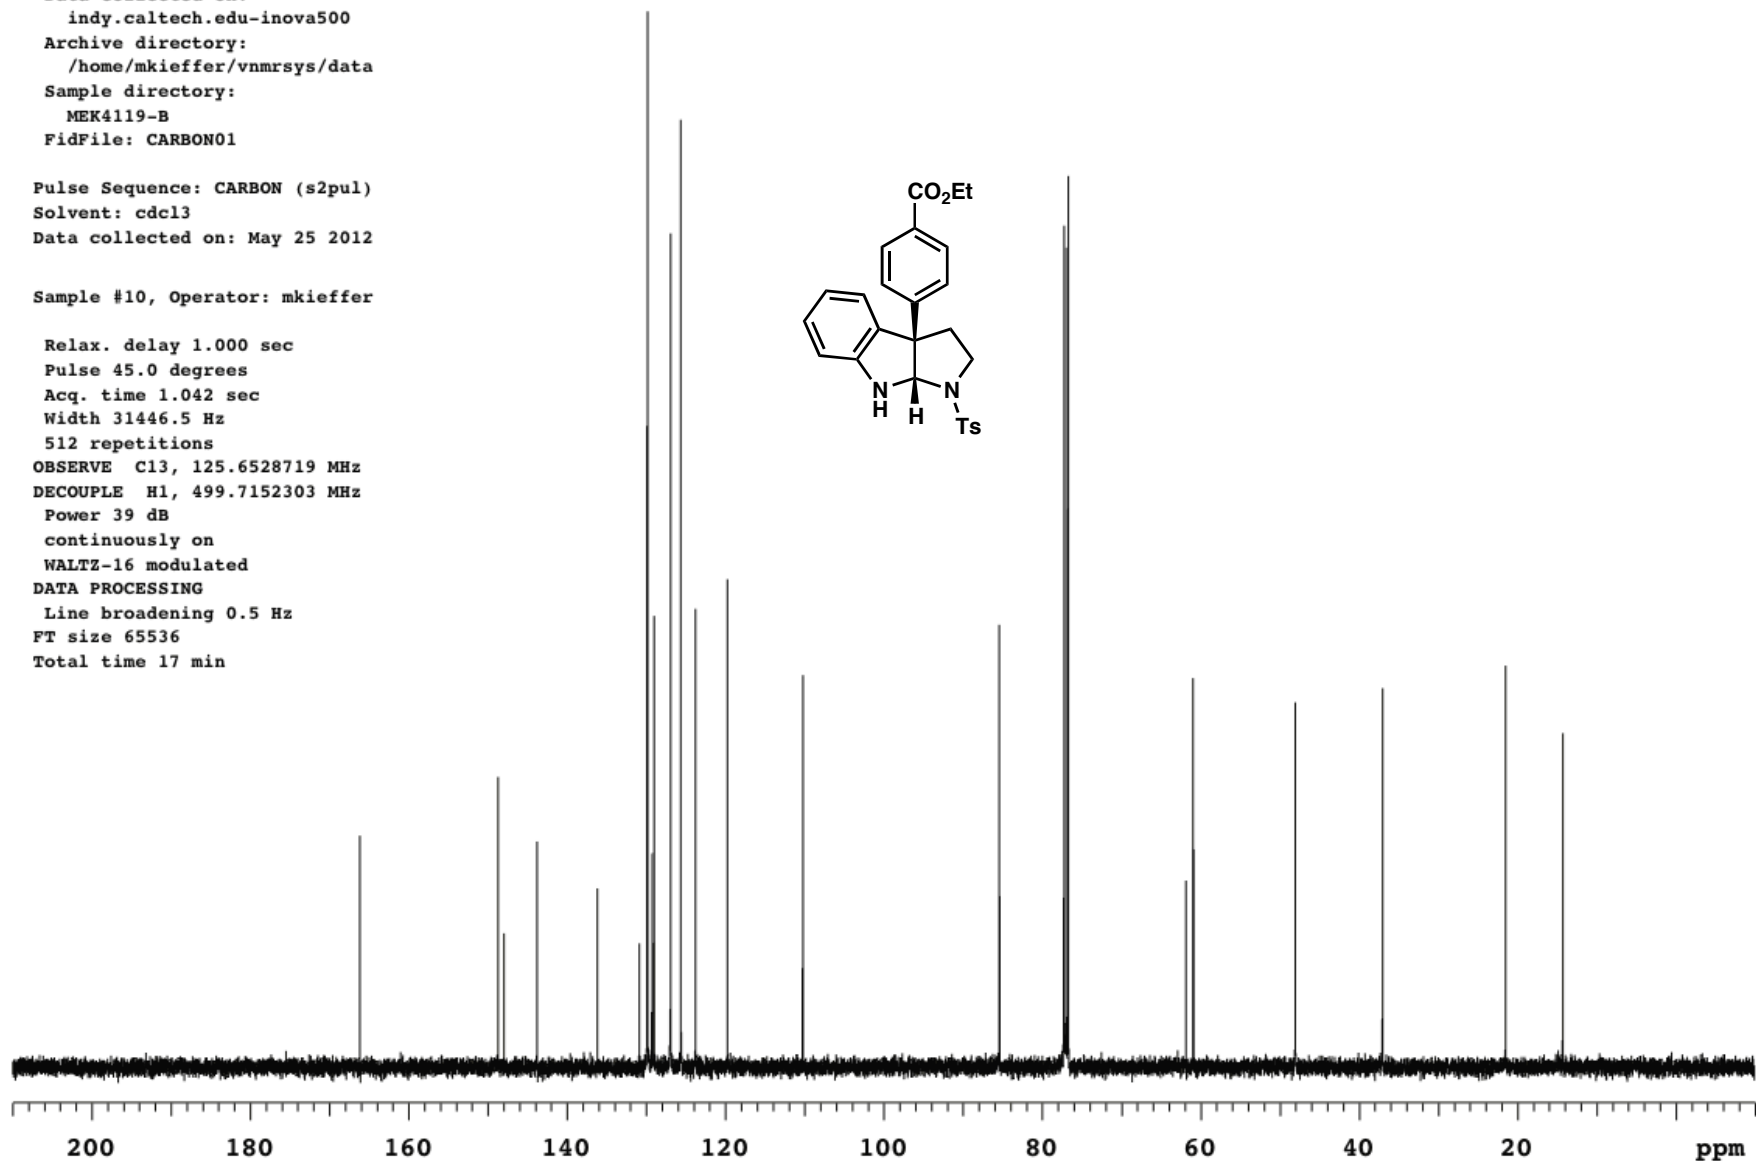

Supplement: c2sc20914d.pdf [file c2sc20914d.pdf]
